# Supplementary material for: Catalytic asymmetric Michael and Nef-type sequential reaction of nitroolefin with azlactone to construct oxazole-fused succinimide
Source: Royal Society of Chemistry journal article supplement (doi:10.1039/d4cc04858j), 2024-01-01

## Supporting Information

### Catalytic asymmetric Michael and Nef-type sequential reaction of nitroolefin with azlactone to construct oxazole-fused succinimide

Rui Weng, Yuqiao Zhou, Yaqin Zhang, Xiaoming Feng and Xiaohua

Liu\*

Key Laboratory of Green Chemistry & Technology, Ministry of Education, College of Chemistry,  
Sichuan University, Chengdu 610064, China

\*e-mail: liuxh@scu.edu.cn

#### contents

|                                                                         |    |
|-------------------------------------------------------------------------|----|
| 1. General information.....                                             | 2  |
| 2. Typical procedure for the preparation of guanidines.....             | 3  |
| 3. General procedure for the catalytic asymmetric reaction .....        | 4  |
| 4. Optimization of the reaction conditions .....                        | 7  |
| 5. Determination of the structure of the Michael addition product ..... | 11 |
| 6. Control experiments.....                                             | 16 |
| 7. X-ray crystallography of ( $\pm$ )-4aa .....                         | 19 |
| 8. Characterization of the products .....                               | 21 |
| 9. Substrate scope limitation.....                                      | 76 |
| 10. References .....                                                    | 77 |
| 11. Copies of NMR spectra.....                                          | 78 |

## 1. General information

<sup>1</sup>H NMR spectra were recorded on Bruker ASCEND™ (400 MHz). Chemical shifts are reported in ppm from the tetramethylsilane with the solvent resonance as internal standard (CDCl<sub>3</sub>, δ = 7.26). Data were reported as follows: chemical shift, multiplicity (s = singlet, d = doublet, t = triplet, m = multiplet), coupling constants (Hz), integration. <sup>13</sup>C{<sup>1</sup>H} NMR data were collected on Bruker ASCEND™ (100 MHz) with complete proton decoupling. <sup>19</sup>F{<sup>1</sup>H} NMR spectra were collected on Bruker ASCEND™ (376 MHz) with complete proton decoupling. Melting points (M.p.) were determined using OptiMelt automated melting point system. High resolution mass spectra (HRMS) analyses were recorded on Thermo Scientific Q Exactive hybrid quadrupole-Orbitrap mass spectrometer (ESI Source) and methanol were used to dissolve the sample. Enantiomeric excesses (ee) were determined by UPC<sup>2</sup> analysis by using the corresponding commercial chiralpak column as stated in the experimental procedures at 35 °C with PDA detector. Optical rotations were measured on a Rudolph Autopol V automatic polarimeter and are reported as follows:  $[\alpha]_{\lambda}^T = (c = \text{g}/100 \text{ mL, in solvent})$ . IR spectra were recorded on Bruker TENSOR II IR spectrophotometer. Unless otherwise indicated, reagents obtained from commercial sources were used without further purification. Chemical reagents were purchased from Alfa, Adamas, Ark, Aladdin, Innochem, TCI, etc. Solvents were dried and distilled prior to use according to the standard methods. The azlactones were prepared according to literature procedure.<sup>1</sup> The nitroolefins were synthesized by following the literature procedure.<sup>2</sup> Unless otherwise indicated, all reactions below were carried out without the protection of inert gas.

## 2. Typical procedure for the preparation of guanidines

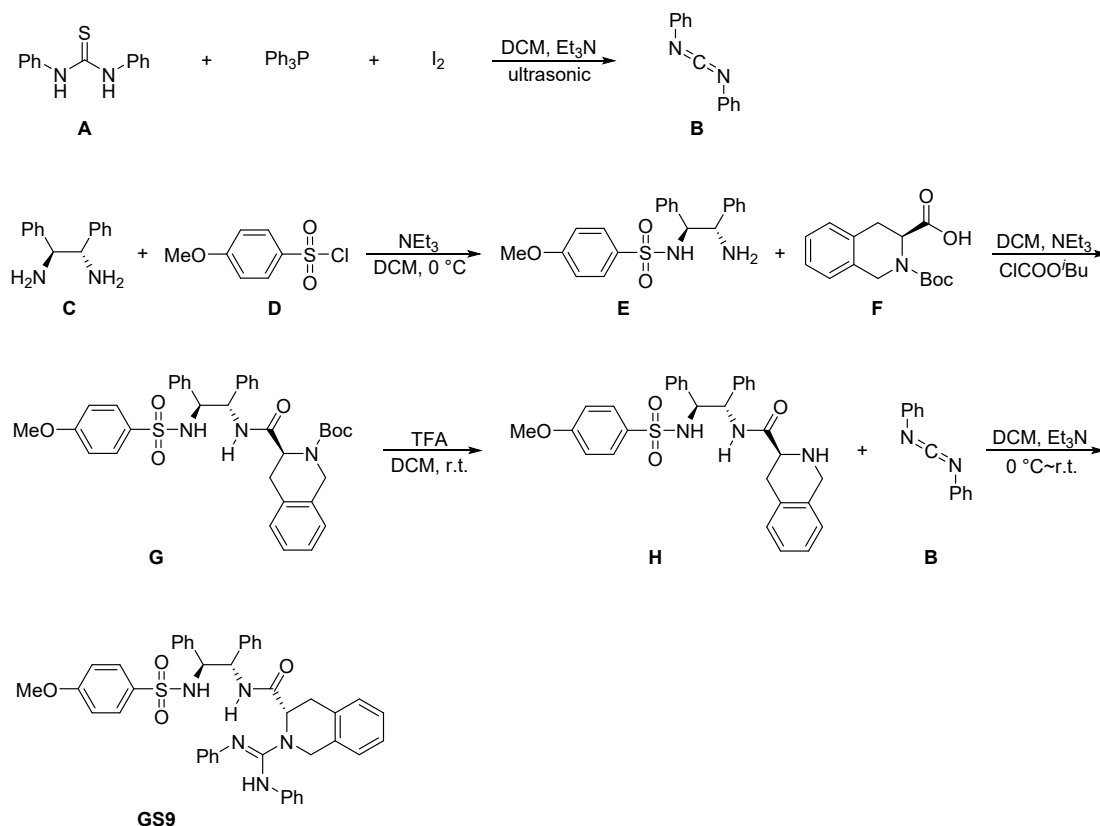

To a solution of iodine (12.0 mmol) and triphenylphosphine (12.0 mmol) in  $\text{DCM}$  (70 mL) was added a solution of thiourea or urea (10.0 mmol) and  $\text{NEt}_3$  (25.0 mmol) in  $\text{DCM}$  (70 mL) under sonication. The reaction mixture was further sonicated until completion of the reaction as indicated by TLC. The crude mixture was concentrated under reduced pressure then purified by flash chromatograph using hexane to give the carbodiimide (75% yield).

A solution of sulfonyl chloride **D** (10.0 mmol) was slowly added to a stirred solution of diamine **C** (10.0 mmol),  $\text{NEt}_3$  (11.0 mmol) in  $\text{DCM}$  (25 mL). The resulting mixture was stirred for another 2 hours, washed twice with water (25 mL) and dried over  $\text{Na}_2\text{SO}_4$ . The solvent was removed *in vacuo* to give a white solid **E**. To a solution of **F** in  $\text{DCM}$  (40 mL) was added  $\text{NEt}_3$  (11.0 mmol), isobutyl carbonochloridate (11.0 mmol) at  $0\text{ }^\circ\text{C}$  under stirring. After 10 min, **E** was added. The reaction was allowed to warm to room temperature for another 2 hours. The mixture was washed with 1 N  $\text{KHSO}_4$  solution, saturated  $\text{NaHCO}_3$  solution, and brine, dried over anhydrous  $\text{Na}_2\text{SO}_4$  and concentrated to get a white solid **G**. Then,  $\text{TFA}$  (10 mL) was added to the  $\text{DCM}$  (10 mL) solution of **G**, and stirred until the reaction finished (1 h). The *pH* value of the mixture was brought into the range of 10–12 by the addition of 2 N  $\text{NaOH}$  solution. The aqueous phase was extracted with  $\text{DCM}$  ( $3 \times 30\text{ mL}$ ). The combined organic phase was washed with brine, dried over anhydrous  $\text{Na}_2\text{SO}_4$  and concentrated and then purified through flash chromatograph to give a white solid **H** (70% yield). To a solution of **H** (3.0 mmol) and **B** (3.6 mmol) in  $\text{DCM}$  (15 mL) was added  $\text{NEt}_3$  (3.0 mmol). The resulting mixture was stirred for another 4 hours at room temperature. The crude mixture was concentrated under reduced pressure then purified by flash chromatograph to give the guanidine (50% yield)

For other catalysts, the synthesis method could be found in the literature.<sup>3</sup>

### 3. General procedure for the catalytic asymmetric reaction

#### 3.1 General procedure for the preparation of the racemic products

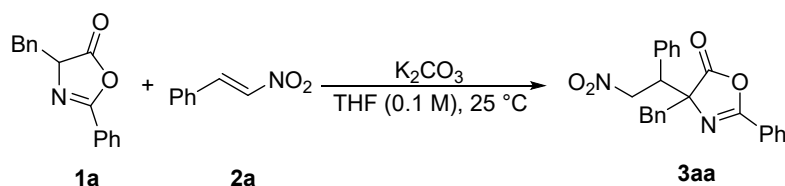

The reaction was conducted with azlactone **1a** (0.10 mmol), nitroolefin **2a** (1.0 equiv, 0.10 mmol), and potassium carbonate (K<sub>2</sub>CO<sub>3</sub>, 20 mol %, 2.8 mg) in THF (1.0 mL) at 25 °C. Upon the completion of this reaction, the mixture was subjected to column chromatography on silica gel (eluent: ethyl acetate/petroleum ether = 1:15) to afford the corresponding product **3aa**.

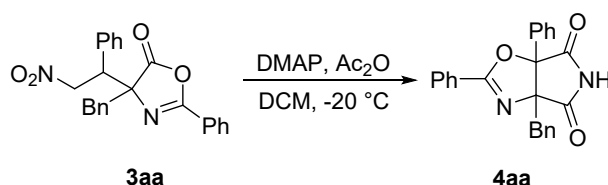

The reaction was conducted with **3aa** (0.10 mmol), 4-dimethylaminopyridine (DMAP, 4.0 equiv, 48.8 mg), and acetic anhydride (Ac<sub>2</sub>O, 4.0 equiv, 37.6 μL) in DCM (1.0 mL) at -20 °C. Upon the completion of this reaction, the solution was dilute with water (1 mL) and then was extracted with DCM (3 x 5 mL) and the organic phase was washed with brine (10 mL), dried (Na<sub>2</sub>SO<sub>4</sub>) and concentrated. The resulting crude product was subjected to column chromatography on silica gel (eluent: ethyl acetate/petroleum ether = 1:4, v/v) to afford the corresponding racemic product **4aa** (>95:5 dr).

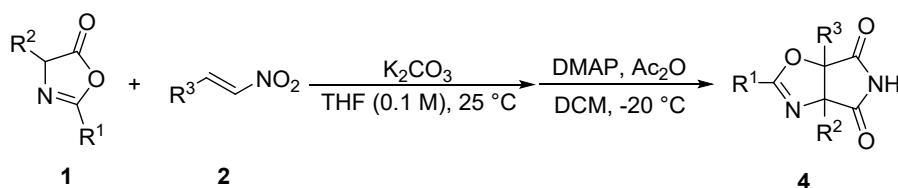

The reaction was conducted with azlactone **1** (0.10 mmol), nitroolefin **2** (1.0 equiv, 0.10 mmol), and potassium carbonate (K<sub>2</sub>CO<sub>3</sub>, 20 mol %, 2.8 mg) in THF (1.0 mL) at 25 °C. Upon the completion of this reaction, the mixture was filtered on Celite and concentrated *in vacuo*. then the residue was dissolved in DCM (1.0 mL), 4-dimethylaminopyridine (DMAP, 4.0 equiv, 48.8 mg), and acetic anhydride (Ac<sub>2</sub>O, 4.0 equiv, 37.6 μL) was added to this solution at -20 °C, Then the mixture was stirred at the same temperature. Upon the completion of this reaction, the solution was dilute with water (1 mL) and then was extracted with DCM (3 x 5 mL) and the organic phase was washed with brine (10 mL), dried (Na<sub>2</sub>SO<sub>4</sub>) and concentrated. The resulting crude product was subjected to column chromatography on silica gel (eluent: ethyl acetate/petroleum ether = 1:5–1:2, v/v) to afford



the corresponding racemic product **4**.

### 3.2 General procedure for the catalytic asymmetric reactions

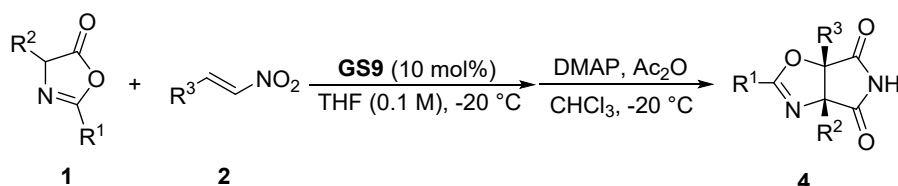

Nitroolefin **2** (1.0 equiv, 0.10 mmol), **GS9** (10 mol%, 7.4 mg) and THF (1.0 mL) were added to an oven-dried reaction tube. After the mixture has been stirred at -20 °C for 10 min, azlactone **1** (0.10 mmol) was added. Then the mixture was stirred at -20 °C for indicated time. Upon the completion of this reaction, the volatile was removed under reduced pressure, then the residue was dissolved in CHCl<sub>3</sub> (1.0 mL), 4-dimethylaminopyridine (DMAP, 3.2 equiv, 39.0 mg), and acetic anhydride (Ac<sub>2</sub>O, 3.2 equiv, 30.1 μL) were added to this solution at -20 °C. Then the mixture was stirred at the same temperature for 72 h. Upon the completion of this reaction, the solution was dilute with water (1 mL) and then was extracted with DCM (3 x 5 mL). The organic phase was washed with brine (10 mL), dried (Na<sub>2</sub>SO<sub>4</sub>) and concentrated. The resulting crude product was subjected to column chromatography on silica gel (eluent: ethyl acetate/petroleum ether = 1:5–1:2, v/v) to afford the corresponding chiral product **4**.

### 3.3 Experimental procedure for the scale-up reaction

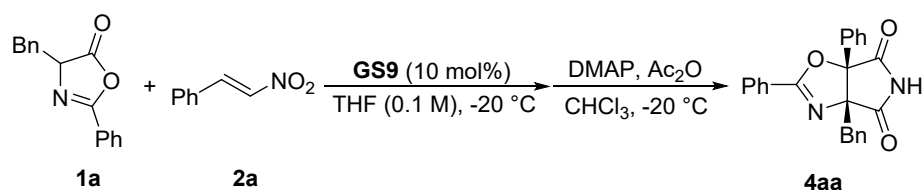

Nitroolefin **2** (4.0 mmol, 0.596 g), **GS9** (10 mol%, 0.294 g) and THF (40 mL) were added to an oven-dried flask. After the mixture has been stirred at -20 °C for 10 min, azlactone **1** (4.0 mmol, 1.00 g) was added in portions. Then the mixture was stirred at -20 °C for 48 h. Upon the completion of this reaction, the volatile was removed under reduced pressure, then the residue was dissolved in CHCl<sub>3</sub> (40 mL), 4-dimethylaminopyridine (DMAP, 12.8 mmol, 1.5616 g), and acetic anhydride (Ac<sub>2</sub>O, 12.8 mmol, 1.2 mL) were added to this solution at -20 °C. Then the mixture was stirred at the same temperature for 72 h. Upon the completion of this reaction, the solution was dilute with water (40 mL) and then was extracted with DCM (3 x 20 mL) and the organic phase was washed with brine, dried (Na<sub>2</sub>SO<sub>4</sub>) and concentrated. The resulting crude product was subjected to column chromatography on silica gel (eluent: ethyl acetate/petroleum ether = 1:4) to afford the corresponding product **4aa** (1.419 g, 93% yield, >95:5 dr, 92% ee).

### 3.4 Experimental procedure for further transformation

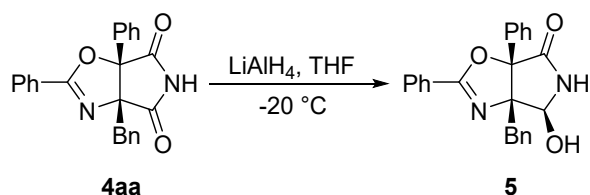

To a suspension of  $\text{LiAlH}_4$  (0.25 mmol) in dry THF (1.25 mL), was added a solution of **4aa** (76.4 mg, 0.2 mmol) in dry THF (40 mL) at  $-20\text{ }^\circ\text{C}$  under a nitrogen atmosphere. Then the mixture was stirred at  $-20\text{ }^\circ\text{C}$  for 3 h. Saturated  $\text{Na}_2\text{SO}_4$  (aq, 0.2 mL) was added to the mixture. After being stirred for 10 min,  $\text{Na}_2\text{SO}_4$  (56.8 mg, 0.4 mmol) was added to the mixture. The resulting mixture was filtered on Celite and concentrated *in vacuo*. The residue was purified by column chromatography on silica gel (eluent: ethyl acetate/petroleum ether = 1:1.5, v/v, then ethyl acetate/dichloromethane = 1:15, v/v) to afford product **5**.

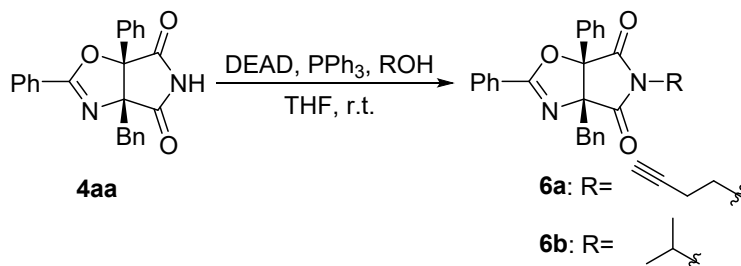

Diethyl azodicarboxylate (DEAD, 1.3 equiv, 0.13 mmol, 20.5  $\mu\text{L}$ ) was added to a stirred solution of **4aa** (0.1 mmol, 38.2 mg), triphenylphosphine ( $\text{PPh}_3$ , 1.3 equiv, 0.13 mmol, 34.1 mg) and alcohol (1.2 equiv, 0.12 mmol) in THF (0.5 mL). After 24 h at room temperature, the reaction mixture was concentrated under reduced pressure, the residue was purified by column chromatography on silica gel (eluent: ethyl acetate/petroleum ether = 1:15, v/v) to afford the product **6**.

## 4. Optimization of the reaction conditions

### 4.1 Optimization of the Michael reaction conditions

#### 4.1.1 Screening of solvents

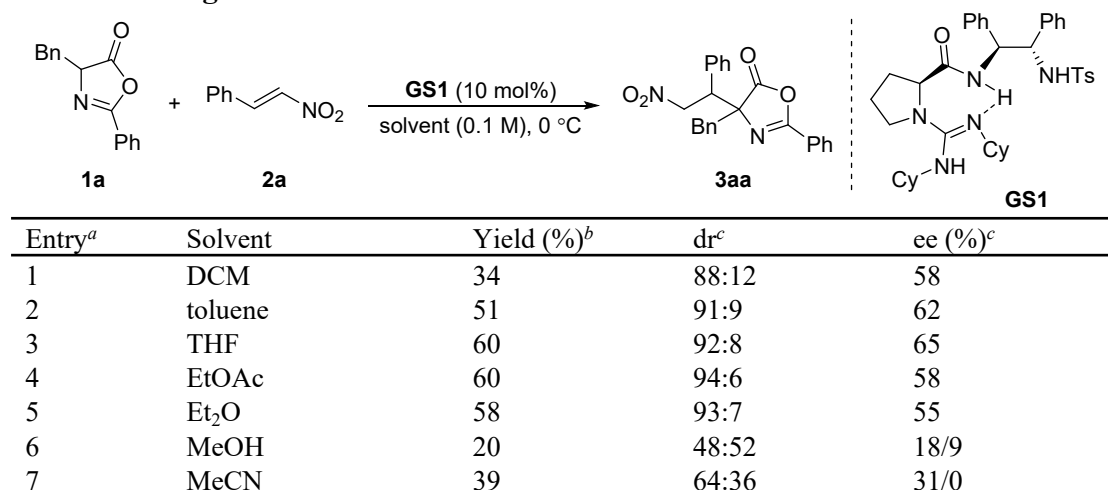

<sup>a</sup>Unless otherwise noted, all reactions were carried out with **1a** (0.12 mmol), **2a** (0.10 mmol), and the catalyst (10 mol%) in solvent (0.1 M) at 0 °C for 18 h. <sup>b</sup>Isolated yield. <sup>c</sup>Determined by UPC<sup>2</sup> analysis on a chiral stationary phase.

#### 4.1.2 Screening of guanidines

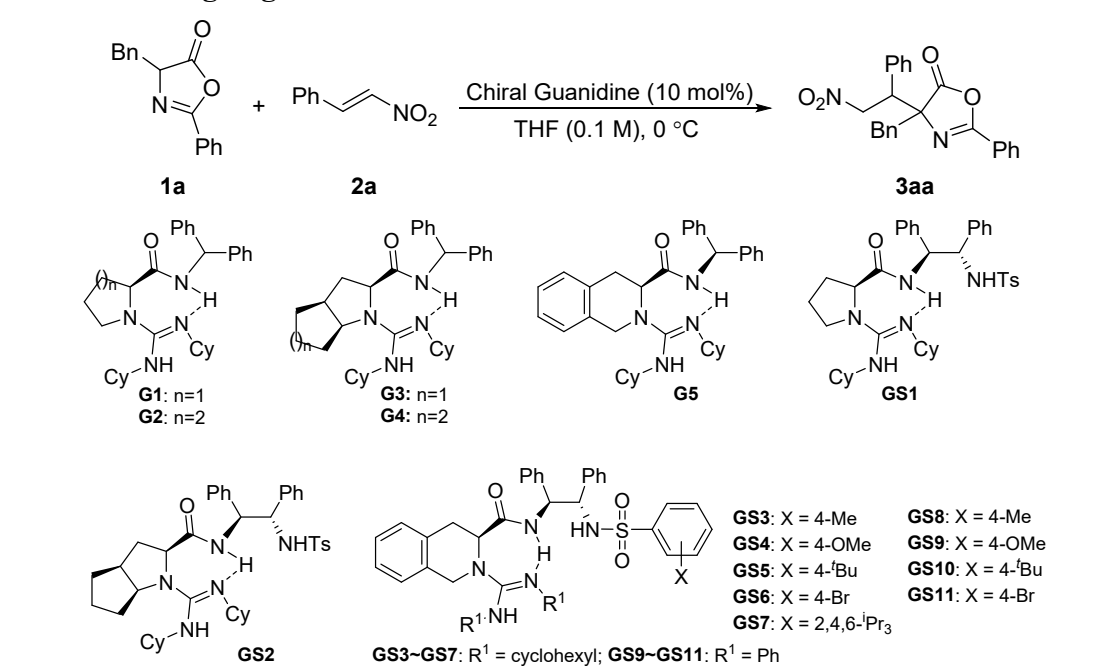

|    |             |    |       |    |
|----|-------------|----|-------|----|
| 8  | <b>GS3</b>  | 82 | >95:5 | 72 |
| 9  | <b>GS4</b>  | 88 | 95:5  | 70 |
| 10 | <b>GS5</b>  | 79 | >95:5 | 77 |
| 11 | <b>GS6</b>  | 90 | 94:6  | 71 |
| 12 | <b>GS7</b>  | 82 | 92:8  | 31 |
| 13 | <b>GS8</b>  | 87 | >95:5 | 86 |
| 14 | <b>GS9</b>  | 99 | >95:5 | 90 |
| 15 | <b>GS10</b> | 97 | >95:5 | 90 |
| 16 | <b>GS11</b> | 93 | >95:5 | 87 |

<sup>a</sup>Unless otherwise noted, all reactions were carried out with **1a** (0.12 mmol), **2a** (0.10 mmol), and the catalyst (10 mol%) in THF (0.1 M) at 0 °C for 18 h. <sup>b</sup>Isolated yield. <sup>c</sup>Determined by UPC<sup>2</sup> analysis on a chiral stationary phase.

### 4.1.3. Screening of temperature

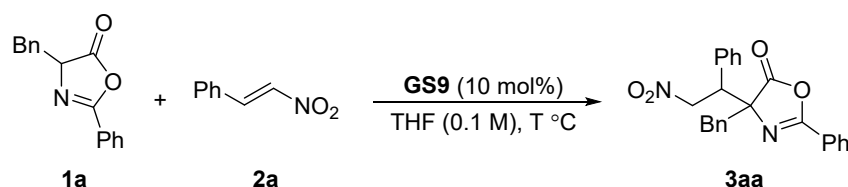

| Entry <sup>a</sup> | T (°C) | Yield (%) <sup>b</sup> | dr <sup>c</sup> | ee (%) <sup>c</sup> |
|--------------------|--------|------------------------|-----------------|---------------------|
| 1                  | 0      | >99                    | 99:1            | 90                  |
| 2                  | -10    | >99                    | >99:1           | 90                  |
| 3                  | -20    | >99                    | >99:1           | 92                  |
| 4                  | -30    | 98                     | >99:1           | 91                  |
| 5                  | -40    | 90                     | 98:2            | 84                  |

<sup>a</sup>Unless otherwise noted, all reactions were carried out with **1a** (0.12 mmol), **2a** (0.10 mmol), and the catalyst (10 mol%) in THF (0.1 M) at 0 °C for 48 h. <sup>b</sup>Isolated yield. <sup>c</sup>Determined by UPC<sup>2</sup> analysis on a chiral stationary phase.

## 4.2 Optimization of the Nef-type reaction conditions

### 4.2.1 Screening of dehydrating agent

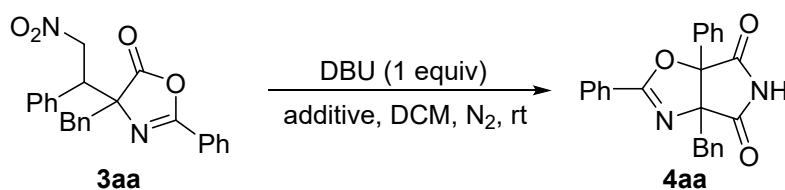

| Entry <sup>a</sup> | dehydrating agent           | Yield (%) <sup>b</sup> | dr <sup>c</sup> |
|--------------------|-----------------------------|------------------------|-----------------|
| 1                  | -                           | 18                     | >95:5           |
| 2                  | DCC (1 equiv)               | 42                     | >95:5           |
| 3                  | HBTU (1.2 equiv)            | complex                | n.d.            |
| 4                  | MsCl (1 equiv)              | trace                  | n.d.            |
| 5                  | SOCl <sub>2</sub> (1 equiv) | complex                | n.d.            |
| 6                  | Tf <sub>2</sub> O (1 equiv) | complex                | n.d.            |
| 7                  | Ac <sub>2</sub> O (1 equiv) | 59                     | >95:5           |
| 8                  | 3Å MS (20 mg)               | 17                     | >95:5           |
| 9                  | 4Å MS (20 mg)               | 15                     | >95:5           |
| 10                 | 5Å MS (20 mg)               | 17                     | >95:5           |

<sup>a</sup>Unless otherwise noted, all reactions were carried out with **3aa** (0.10 mmol), DBU (0.1 mmol) and the dehydrating agent in DCM (1.0 mL) at room temperature for 24 h. <sup>b</sup>Isolated yield. <sup>c</sup>Determined by <sup>1</sup>H NMR.

#### 4.2.2 Screening of base

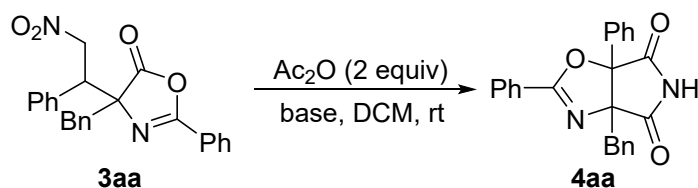

| Entry <sup>a</sup> | base                                        | Yield (%) <sup>b</sup> | dr <sup>c</sup> |
|--------------------|---------------------------------------------|------------------------|-----------------|
| 1                  | -                                           | n.r.                   | n.d.            |
| 2                  | DABCO (2.0 equiv)                           | 35                     | >95:5           |
| 3                  | DBU (3.0 equiv)                             | 63                     | >95:5           |
| 4                  | KO <sup>t</sup> Bu (3.0 equiv)              | 23                     | >95:5           |
| 5                  | Cs <sub>2</sub> CO <sub>3</sub> (3.0 equiv) | 10                     | >95:5           |
| 6                  | DMAP (3.0 equiv)                            | 79                     | >95:5           |
| 7 <sup>d</sup>     | DMAP (4.0 equiv)                            | 91                     | >95:5           |

<sup>a</sup>Unless otherwise noted, all reactions were carried out with **3aa** (0.10 mmol), Ac<sub>2</sub>O (0.2 mmol) and base (2–4 equiv) in DCM (1.0 mL) at room temperature for 24 h. <sup>b</sup>Isolated yield. <sup>c</sup>Determined by <sup>1</sup>H NMR. <sup>d</sup>Ac<sub>2</sub>O (0.4 mmol) was used.

#### 4.2.3. Screening of temperature

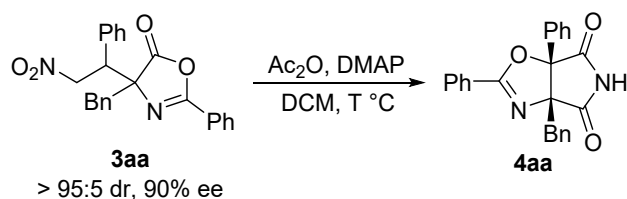

| Entry <sup>a</sup> | T (°C) | Yield (%) <sup>b</sup> | dr <sup>c</sup> | ee (%) <sup>d</sup> |
|--------------------|--------|------------------------|-----------------|---------------------|
| 1                  | 0      | 80                     | >95:5           | 88                  |
| 2                  | -10    | 78                     | >95:5           | 88                  |
| 3                  | -20    | 83                     | >95:5           | 89                  |
| 4                  | -30    | 79                     | >95:5           | 89                  |
| 5                  | -40    | 73                     | >95:5           | 89                  |

<sup>a</sup>Unless otherwise noted, all reactions were carried out with **3aa** (0.1 mmol), DMAP (0.40 mmol) and Ac<sub>2</sub>O (0.4 mmol) in DCM (0.1 M) at T °C for 72 h. <sup>b</sup>Isolated yield. <sup>c</sup>Determined by <sup>1</sup>H NMR. <sup>d</sup>Determined by UPC<sup>2</sup> analysis on a chiral stationary phase.

#### 4.3. Optimization of the sequential reaction conditions

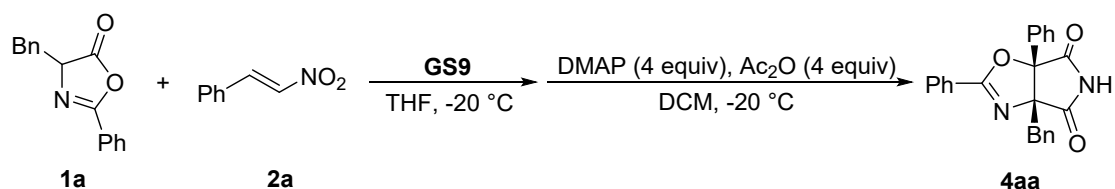

| Entry <sup>a</sup> | Solvent           | Yield (%) <sup>b</sup> | dr <sup>c</sup> | ee (%) <sup>d</sup> |
|--------------------|-------------------|------------------------|-----------------|---------------------|
| 1                  | DCM               | 61                     | >95:5           | 82                  |
| 2                  | Toluene           | 53                     | >95:5           | 88                  |
| 3                  | EtOAc             | 64                     | >95:5           | 84                  |
| 4                  | THF               | 59                     | >95:5           | 80                  |
| 5                  | CHCl <sub>3</sub> | 70                     | >95:5           | 89                  |

|                  |                   |    |       |    |
|------------------|-------------------|----|-------|----|
| 6 <sup>e</sup>   | CHCl <sub>3</sub> | 78 | >95:5 | 90 |
| 7 <sup>f</sup>   | CHCl <sub>3</sub> | 66 | >95:5 | 88 |
| 8 <sup>e,g</sup> | CHCl <sub>3</sub> | 86 | >95:5 | 90 |

<sup>a</sup>Unless otherwise noted, all reactions were carried out with **1a** (0.12 mmol), **2a** (0.10 mmol) and **GS9** (10 mol%) in THF (0.1 M) at –20 °C for 48 h. After removal of solvent, DMAP (0.4 mmol), Ac<sub>2</sub>O (0.4 mmol) in solvent (1.0 mL) were added, and the mixture continued stirring at –20 °C for 72 h. <sup>b</sup>Isolated yield. <sup>c</sup>Determined by <sup>1</sup>H NMR. <sup>d</sup>Determined by UPC2 analysis on a chiral stationary phase. <sup>e</sup>**1a** (0.1 mmol), **2a** (0.10 mmol) were used. <sup>f</sup>**1a** (0.1 mmol), **2a** (0.12 mmol) were used. <sup>g</sup>DMAP (0.32 mmol), Ac<sub>2</sub>O (0.32 mmol) were used.

## 5. Determination of the structure of the Michael addition product

### 5.1 Preparation of Michael addition products

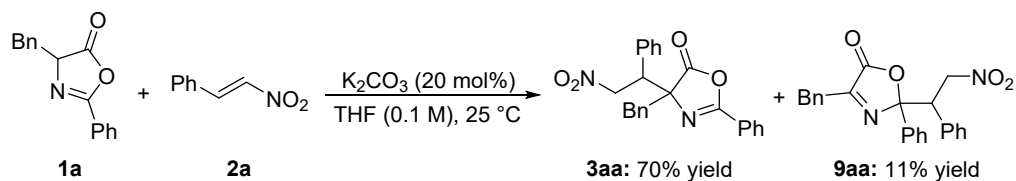

The reaction was conducted with azlactone **1a** (0.10 mmol), nitroolefin **2a** (1.0 equiv, 0.10 mmol), and potassium carbonate ( $K_2CO_3$ , 20 mol %, 2.8 mg) in THF (1.0 mL) at 25 °C. Upon the completion of this reaction, the mixture was subjected to column chromatography on silica gel (eluent: ethyl acetate/petroleum ether = 1:25) to afford the corresponding product **3aa** and **9aa**.

When the Michael addition reaction was catalyzed by potassium carbonate, C4 adduct (**3aa**) and C2 adduct (**9aa**) could be obtained at the same time. Additionally, the pair of diastereoisomers of **3aa** could be isolated by silica gel column chromatography. When the Michael addition reaction was catalyzed by chiral guanidine-sulfonamide, the formation of C2 adduct would be repressed obviously and no **9aa** was observed.

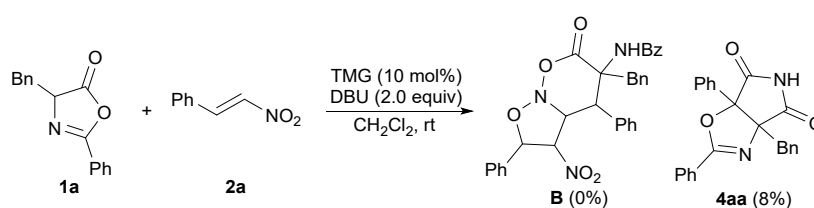

To our surprise when azlactone **1a** and nitroolefin **2a** were treated with TMG and excessive DBU, a fused succinimide oxazoline **4aa** was isolated in trace amount, which intrigued us for sequential transformation.

## 5.2 Transformation of Michael addition products

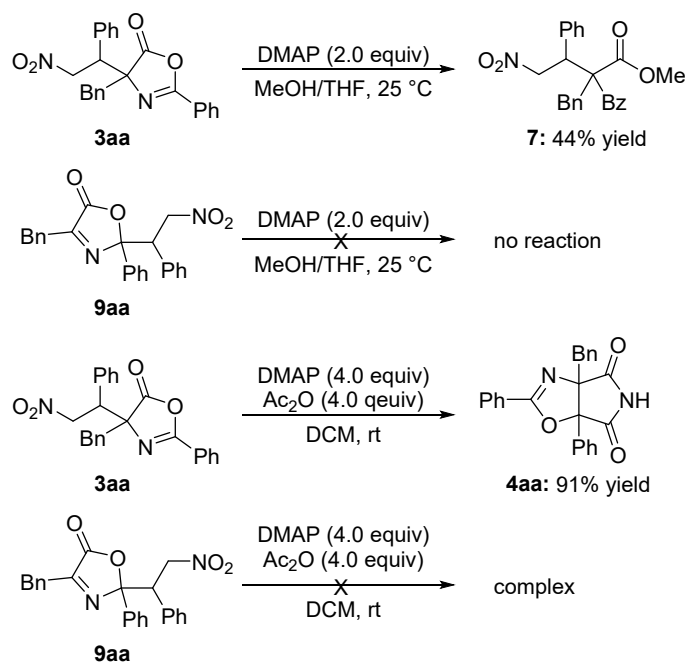

In order to confirm the structure of the Michael addition products, the following transformation experiments were designed. The ring-opening reaction of **3aa** in methanol could be readily carried out to yield the lactonization product **7**, whereas **9aa** fails to react under the same conditions. The Nef-type reaction of **3aa** could also be readily carried out under standard conditions to yield **4aa**, whereas **9aa** will decompose under the same conditions. These results indicate that **3aa** is the C4 adduct and **9aa** might be the C2 adduct.



## 5.3 Copies of NMR spectra

### 3aa

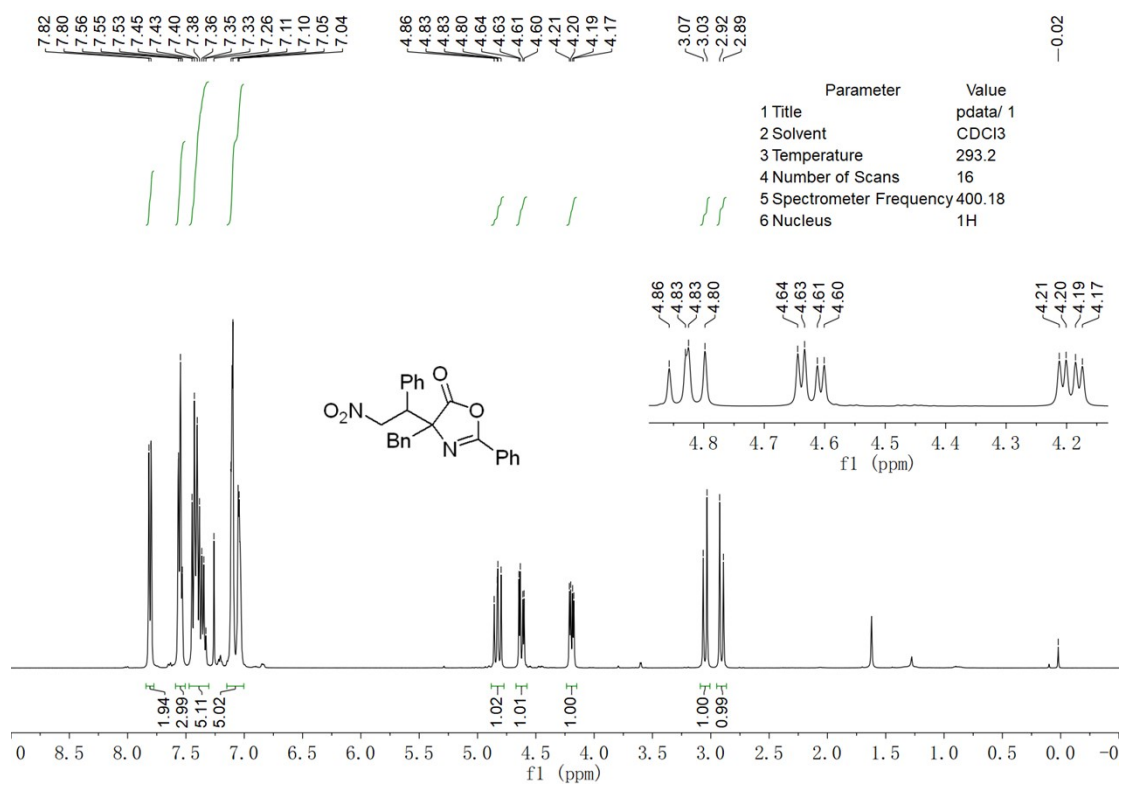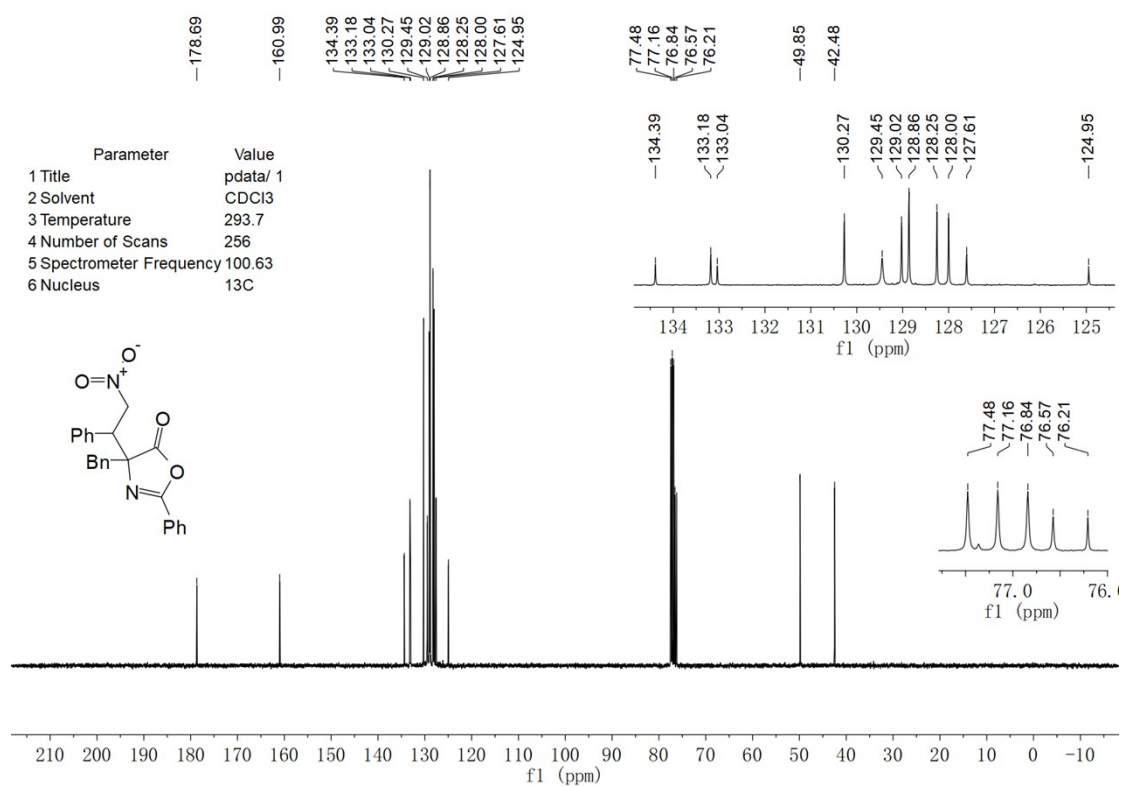

The diastereoisomer of **3aa**

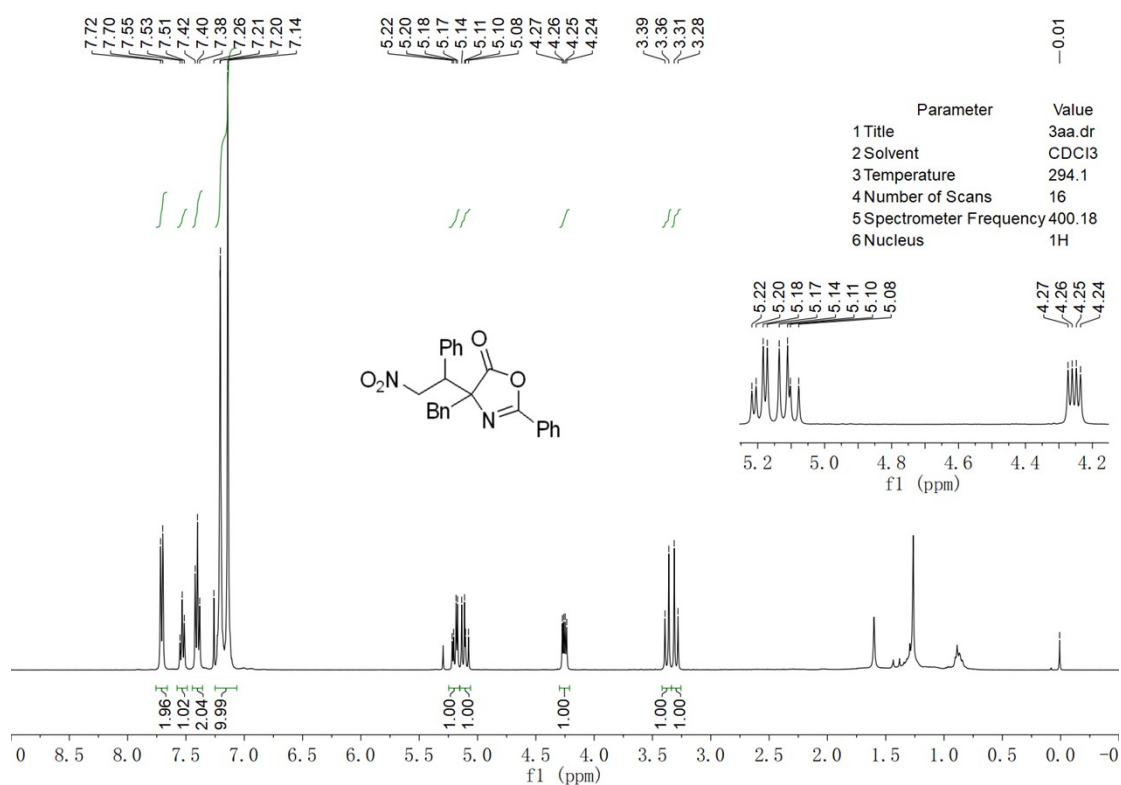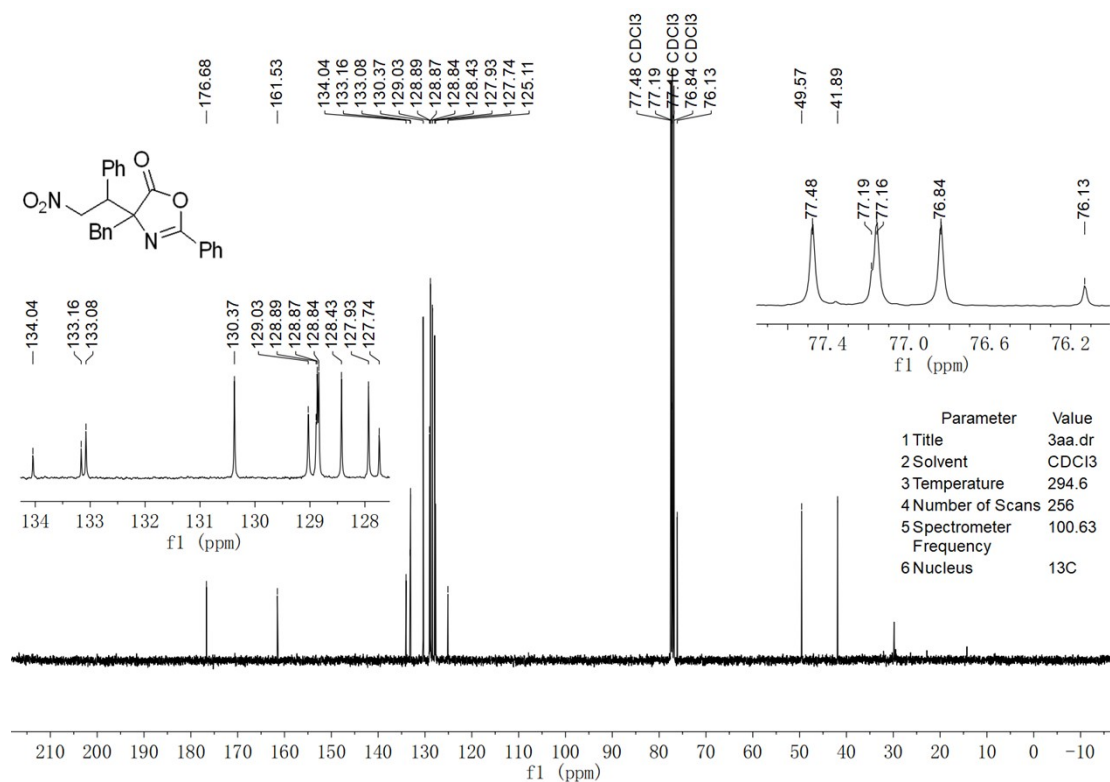

**9aa (C2 adduct)**

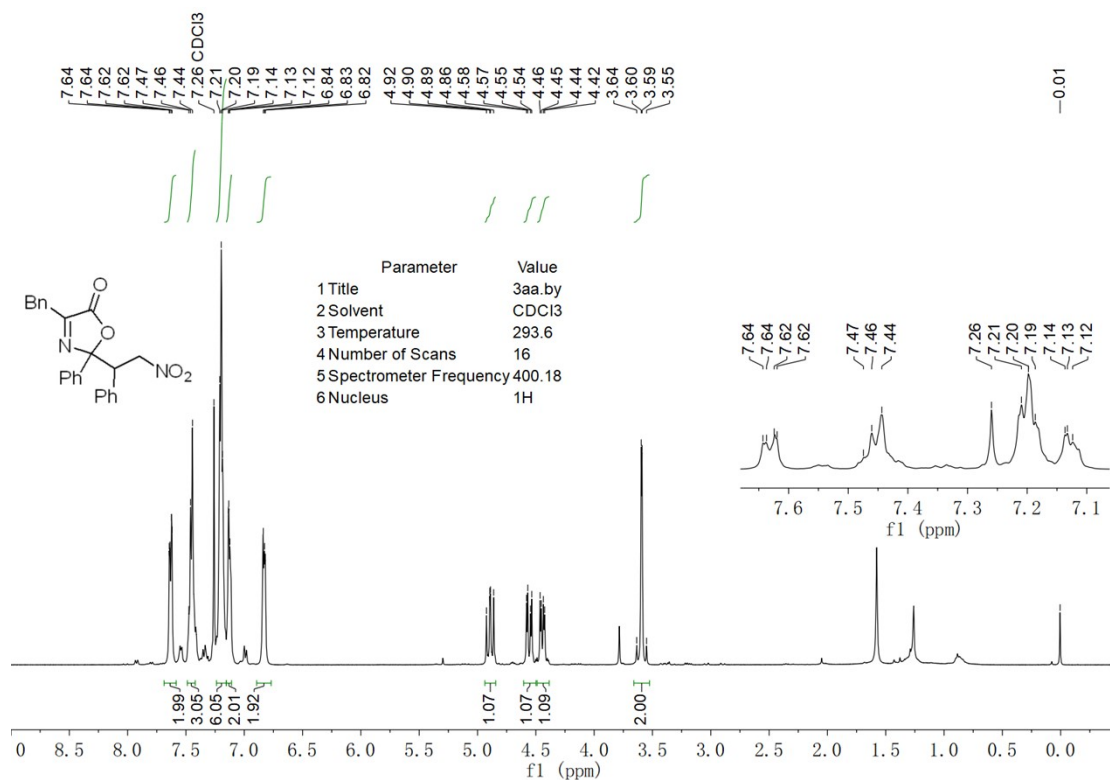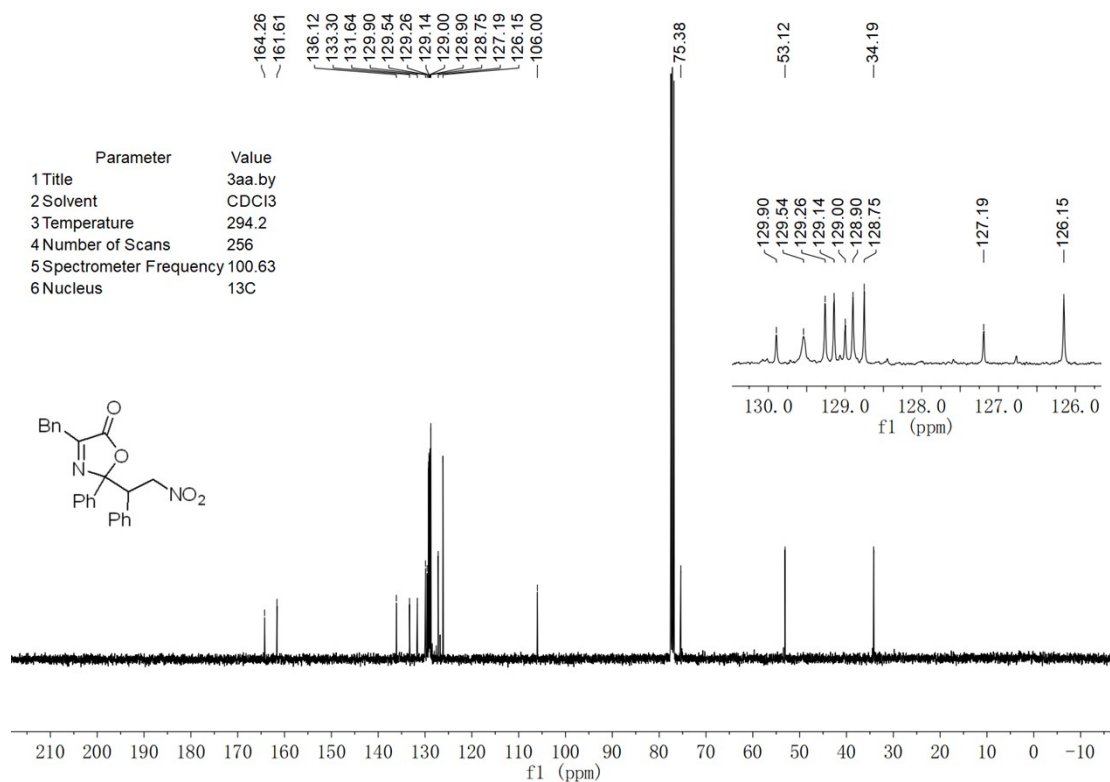

## 6. Control experiments

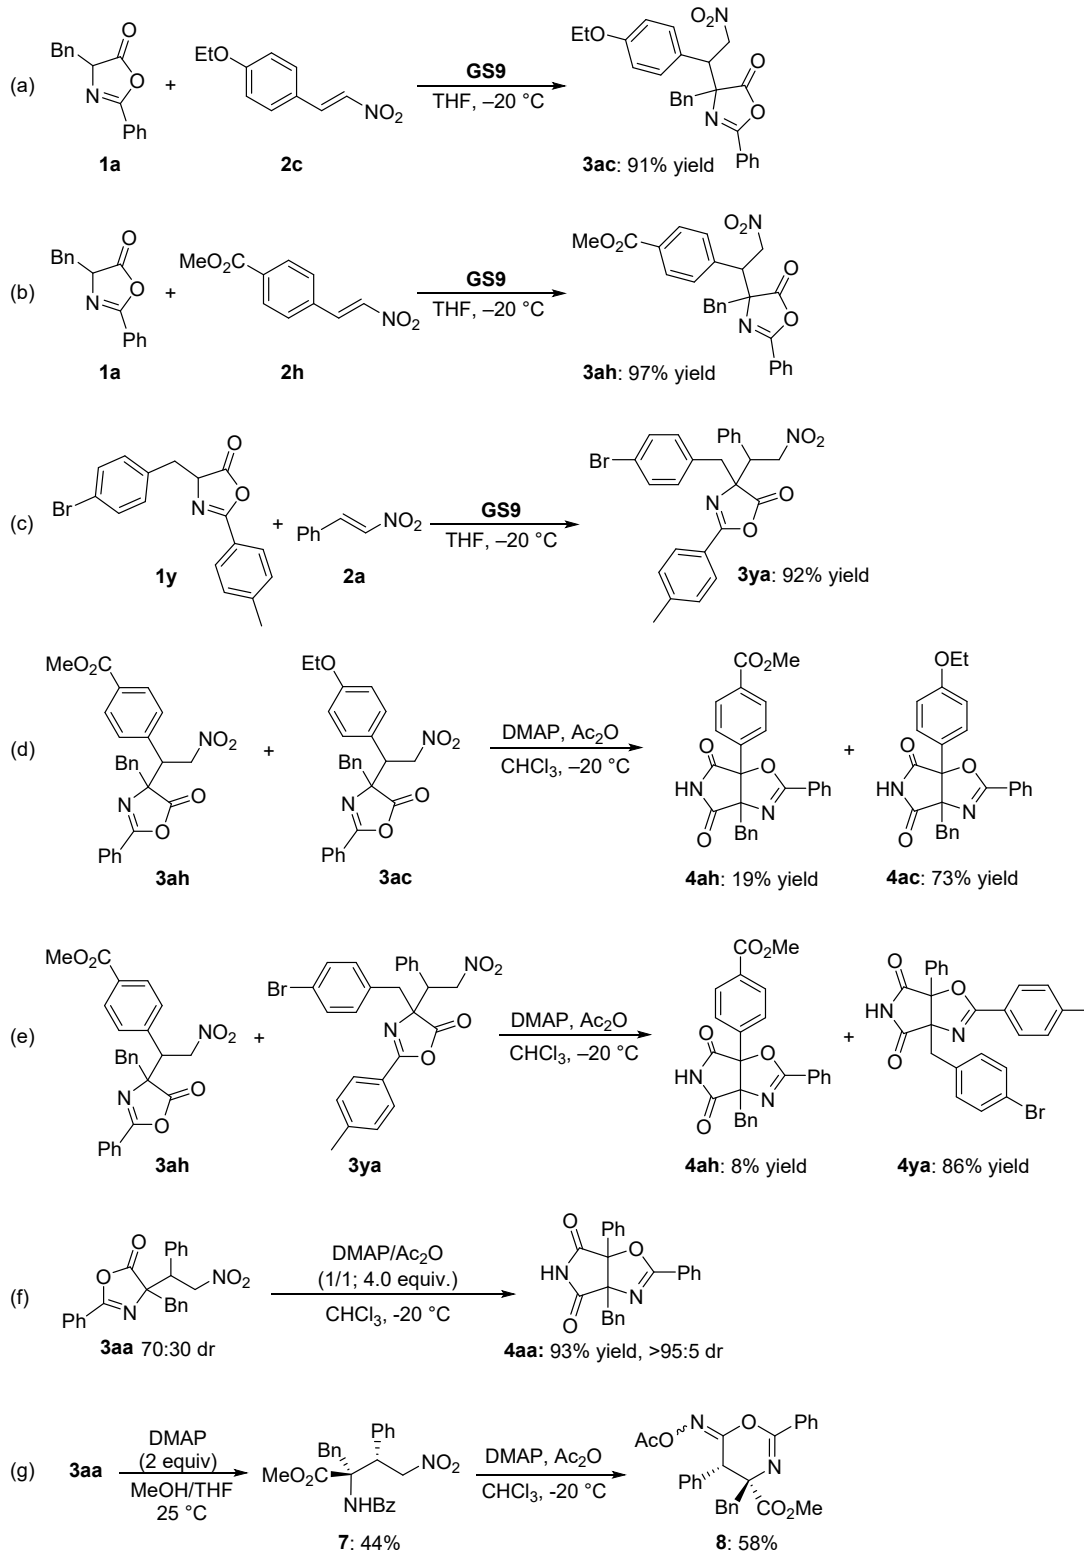

### Procedure:

(a) Nitroolefin **2c** (0.10 mmol, 19.3 mg), **GS9** (10 mol %, 7.4 mg) and THF (1.0 mL) were added to an oven-dried reaction tube. After the mixture has been stirred at  $-20\text{ }^{\circ}\text{C}$  for 10 min, azlactone **1a** (0.10 mmol, 25.1 mg) was added. Then the mixture was stirred at  $-20\text{ }^{\circ}\text{C}$  for 48 h. Upon the

completion of this reaction, the resulting crude product was subjected to column chromatography on silica gel (eluent: ethyl acetate/petroleum ether = 1:10, v/v) to afford the corresponding product **3ac**.

- (b) Nitroolefin **2h** (0.10 mmol, 20.7 mg), **GS9** (10 mol %, 7.4 mg) and THF (1.0 mL) were added to an oven-dried reaction tube. After the mixture has been stirred at  $-20\text{ }^{\circ}\text{C}$  for 10 min, azlactone **1a** (0.10 mmol, 25.1 mg) was added. Then the mixture was stirred at  $-20\text{ }^{\circ}\text{C}$  for 48 h. Upon the completion of this reaction, the resulting crude product was subjected to column chromatography on silica gel (eluent: ethyl acetate/petroleum ether = 1:10, v/v) to afford the corresponding product **3ah**.
- (c) Nitroolefin **2a** (0.10 mmol, 14.9 mg), **GS9** (10 mol %, 7.4 mg) and THF (1.0 mL) were added to an oven-dried reaction tube. After the mixture has been stirred at  $-20\text{ }^{\circ}\text{C}$  for 10 min, azlactone **1y** (0.10 mmol, 34.4 mg) was added. Then the mixture was stirred at  $-20\text{ }^{\circ}\text{C}$  for 48 h. Upon the completion of this reaction, the resulting crude product was subjected to column chromatography on silica gel (eluent: ethyl acetate/petroleum ether = 1:15, v/v) to afford the corresponding product **3ya**.
- (d) **3ah** (0.09 mmol, 41.2 mg), **3ac** (0.09 mmol, 40.0 mg) and  $\text{CHCl}_3$  (2.0 mL) were added to an oven-dried reaction tube, 4-dimethylaminopyridine (DMAP, 0.72 mmol, 87.8 g), and acetic anhydride ( $\text{Ac}_2\text{O}$ , 0.72 mmol, 67.7  $\mu\text{L}$ ) was added to this solution at  $-20\text{ }^{\circ}\text{C}$ , then the mixture was stirred at the same temperature for 72 h. Upon the completion of this reaction, the solution was dilute with water (1 mL) and then was extracted with DCM (3 x 5 mL) and the organic phase was washed with brine (10 mL), dried ( $\text{Na}_2\text{SO}_4$ ) and concentrated. The resulting crude product was subjected to column chromatography on silica gel (eluent: ethyl acetate/petroleum ether = 1:5–1:2, v/v) to afford the corresponding product **4ah** and **4ac**.
- (e) **3ah** (0.09 mmol, 41.2 mg), **3ya** (0.09 mmol, 44.4 mg) and  $\text{CHCl}_3$  (2.0 mL) were added to an oven-dried reaction tube, 4-dimethylaminopyridine (DMAP, 0.72 mmol, 87.8 g), and acetic anhydride ( $\text{Ac}_2\text{O}$ , 0.72 mmol, 67.7  $\mu\text{L}$ ) was added to this solution at  $-20\text{ }^{\circ}\text{C}$ , then the mixture was stirred at the same temperature for 72 h. Upon the completion of this reaction, the solution was dilute with water (1 mL) and then was extracted with DCM (3 x 5 mL) and the organic phase was washed with brine (10 mL), dried ( $\text{Na}_2\text{SO}_4$ ) and concentrated. The resulting crude product was subjected to column chromatography on silica gel (eluent: ethyl acetate/petroleum ether = 1:5–1:2, v/v) to afford the corresponding product **4ah** and **4ya**.
- (f) **3aa** (0.10 mmol, 40.0 mg) and  $\text{CHCl}_3$  (1.0 mL) were added to an oven-dried reaction tube, 4-dimethylaminopyridine (DMAP, 0.40 mmol, 48.8 g), and acetic anhydride ( $\text{Ac}_2\text{O}$ , 0.40 mmol, 37.6  $\mu\text{L}$ ) were added to this solution at  $-20\text{ }^{\circ}\text{C}$ , then the mixture was stirred at the same temperature for 72 h. Upon the completion of this reaction, the solution was dilute with water (1 mL) and then was extracted with DCM (3 x 5 mL) and the organic phase was washed with brine (10 mL), dried ( $\text{Na}_2\text{SO}_4$ ) and concentrated. The resulting crude product was subjected to column chromatography on silica gel (eluent: ethyl acetate/petroleum ether = 1:4, v/v) to afford the corresponding product **4aa**.
- (g) **3aa** (0.30 mmol, 12.0 mg), 4-dimethylaminopyridine (DMAP, 0.60 mmol, 73.2 g), MeOH (0.6 mL) and THF (2.4 mL) were added to an oven-dried reaction tube, then the mixture was stirred at the room temperature for 72 h. The mixture was subjected to column chromatography on silica gel (eluent: ethyl acetate/petroleum ether = 1:6) to afford the corresponding product **7**. Then, **7** (0.10 mmol, 43.2 mg) and  $\text{CHCl}_3$  (1.0 mL) were added to an oven-dried reaction tube,

4-dimethylaminopyridine (DMAP, 0.40 mmol, 48.8 g), and acetic anhydride ( $\text{Ac}_2\text{O}$ , 0.40 mmol, 37.6  $\mu\text{L}$ ) were added to this solution at  $-20\text{ }^\circ\text{C}$ , then the mixture was stirred at the same temperature for 72 h. Upon the completion of this reaction, the solution was dilute with water (1 mL) and then was extracted with DCM (3 x 5 mL) and the organic phase was washed with brine (10 mL), dried ( $\text{Na}_2\text{SO}_4$ ) and concentrated. The resulting crude product was subjected to column chromatography on silica gel (eluent: ethyl acetate/petroleum ether = 1:5, v/v) to afford the corresponding product **8**.

## 7. X-ray crystallography of ( $\pm$ )-4aa

The colourless crystal in block-shape, with approximate dimensions of  $0.138 \times 0.300 \times 0.500 \text{ mm}^3$ , was selected and mounted for the single-crystal X-ray diffraction. The data set was collected by Bruker D8 Venture Photon II diffractometer at 173(2)K equipped with micro-focus Cu radiation source ( $K_{\alpha} = 1.54178\text{\AA}$ ). Applied with face-indexed numerical absorption correction, the structure solution was solved and refinement was processed by SHELXTL (version 6.14) and OLEX 2.3 program package<sup>a, b, c, d</sup>. The relatively large standard uncertainty indicates that the structural data alone should not be used to confirm absolute stereochemistry, but should be used in conjunction with the established stereochemistry of the precursor compound. The structure was analyzed by ADDSYM routine implemented in PLATON suite and no higher symmetry was suggested<sup>e</sup>. CCDC 2336953 contains the supplementary crystallographic data which can be obtained free of charge from The Cambridge Crystallographic Data Center via <https://www.ccdc.cam.ac.uk/structures/>.

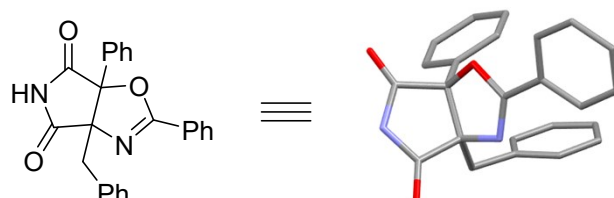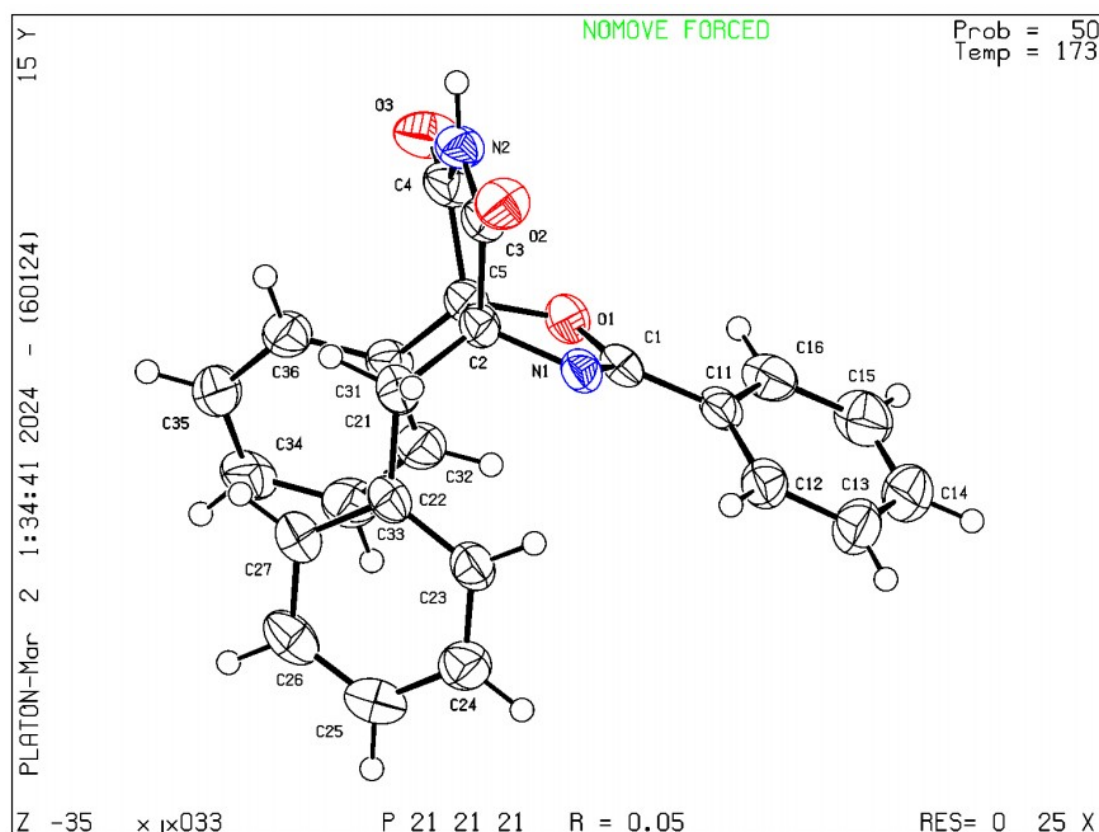

**Figure 1.** The thermal ellipsoid figure of **4aa** with 50% probabilities.

The crystal of product **4aa** was obtained in the solvents of toluene and hexane by diffusion. CCDC: 2336953.

Crystallographic Data for C<sub>24</sub> H<sub>18</sub> N<sub>2</sub> O<sub>3</sub>.

|                                                   |                                                               |
|---------------------------------------------------|---------------------------------------------------------------|
| Formula                                           | C <sub>24</sub> H <sub>18</sub> N <sub>2</sub> O <sub>3</sub> |
| Formula mass (amu)                                | 382.40                                                        |
| Space group                                       | <i>P</i> 2 <sub>1</sub> 2 <sub>1</sub> 2 <sub>1</sub>         |
| <i>a</i> (Å)                                      | 8.6718(3)                                                     |
| <i>b</i> (Å)                                      | 9.0165(3)                                                     |
| <i>c</i> (Å)                                      | 24.3506(9)                                                    |
| $\alpha$ (deg)                                    | 90                                                            |
| $\beta$ (deg)                                     | 90                                                            |
| $\gamma$ (deg)                                    | 90                                                            |
| <i>V</i> (Å <sup>3</sup> )                        | 1903.96(12)                                                   |
| <i>Z</i>                                          | 4                                                             |
| $\lambda$ (Å)                                     | 1.54178                                                       |
| <i>T</i> (K)                                      | 173(2) K                                                      |
| $\rho_{\text{calcd}}$ (g cm <sup>-3</sup> )       | 1.334                                                         |
| $\mu$ (mm <sup>-1</sup> )                         | 0.720                                                         |
| Transmission factors                              | 0.587–1.000                                                   |
| $\theta_{\text{max}}$ (deg)                       | 79.911                                                        |
| No. of unique data, including $F_o^2 < 0$         | 4015                                                          |
| No. of unique data, with $F_o^2 > 2\sigma(F_o^2)$ | 3719                                                          |
| No. of variables                                  | 266                                                           |
| $R(F)$ for $F_o^2 > 2\sigma(F_o^2)$ <sup>a</sup>  | 0.0533                                                        |
| $R_w(F_o^2)$ <sup>b</sup>                         | 0.1429                                                        |
| Goodness of fit                                   | 1.068                                                         |

$$^a R(F) = \sum ||F_o| - |F_c|| / \sum |F_o|.$$

$$^b R_w(F_o^2) = [\sum [w(F_o^2 - F_c^2)^2] / \sum wF_o^4]^{1/2}; w^{-1} = [\sigma^2(F_o^2) + (Ap)^2 + Bp], \text{ where } p = [\max(F_o^2, 0) + 2F_c^2] / 3.$$

References:

<sup>a</sup> Sheldrick, G. M. *Acta Cryst.* **2008**, *A64*, 112–122.

<sup>b</sup> Sheldrick, G. M. *Acta Cryst.* **2015**, *A71*, 3–8.

<sup>c</sup> Sheldrick, G. M. *Acta Cryst.* **2015**, *C71*, 3–8.

<sup>d</sup> Dolomanov, O.V.; Bourhis, L.J.; Gildea, R.J.; Howard, J. A. K.; Puschmann, H. *J. Appl. Cryst.* **2009**, *42*, 339–341.

<sup>e</sup> Spek, A. L. *J. Appl. Cryst.* **2003**, *36*, 7–13.



## 8. Characterization of the products

### 3a-Benzyl-2,6a-diphenyl-3a,6a-dihydro-4*H*-pyrrolo[3,4-*d*]oxazole-4,6(5*H*)-dione (4aa)

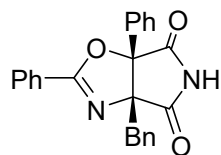

White solid, **M.p.** 88 – 89 °C; 32.9 mg, 86% yield, >95:5 dr, 92% ee.  $[\alpha]_D^{25} = +24.3$  ( $c = 0.61$ , in  $\text{CH}_2\text{Cl}_2$ ).

Dissolved in MeOH for UPC<sup>2</sup>; UPC<sup>2</sup> (Daicel CHIRALPAK **OJ-3**,  $\text{CO}_2/\text{MeOH} = 90/10$ , flow rate = 1.5 mL/min,  $\lambda = 254$  nm) retention time: 6.8 min, 10.0 min. dr >95:5 determined by <sup>1</sup>H NMR.

<sup>1</sup>H NMR (400 MHz, Chloroform-*d*)  $\delta = 9.31$  (s, 1H), 8.10 – 8.08 (m, 2H), 7.58 – 7.55 (m, 1H), 7.48 – 7.44 (m, 2H), 7.41 – 7.38 (m, 1H), 7.34 – 7.30 (m, 2H), 7.11 – 7.10 (m, 2H), 7.02 – 6.98 (m, 1H), 6.91 – 6.87 (m, 2H), 6.50 – 6.48 (m, 2H), 3.45 (d,  $J = 14.6$  Hz, 1H), 2.98 (d,  $J = 14.6$  Hz, 1H) ppm.

<sup>13</sup>C{<sup>1</sup>H} NMR (100 MHz, Chloroform-*d*)  $\delta = 175.4, 174.1, 164.1, 133.6, 132.9, 131.9, 130.5, 129.4, 129.1, 128.8, 127.6, 126.5, 126.2, 125.7, 91.4, 83.2, 36.6$  ppm.

**IR** (neat):  $\nu(\text{cm}^{-1})$  3213, 3064, 3033, 2761, 2351, 1792, 1733, 1642, 1603, 1580, 1496, 1451, 1330, 1215, 1093, 1066, 1027, 975, 761, 696, 641, 501.

**HRMS** (ESI-FT) calcd for  $\text{C}_{24}\text{H}_{19}\text{N}_2\text{O}_3^+$  ( $[\text{M}] + \text{H}^+$ ) = 383.1390, found 383.1394.

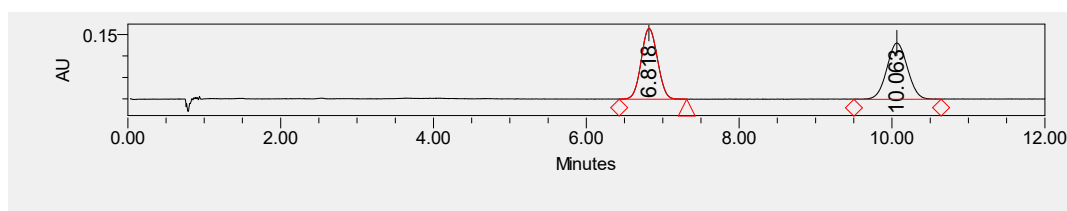

|   | Retention Time | % Area |
|---|----------------|--------|
| 1 | 6.818          | 49.81  |
| 2 | 10.063         | 50.19  |

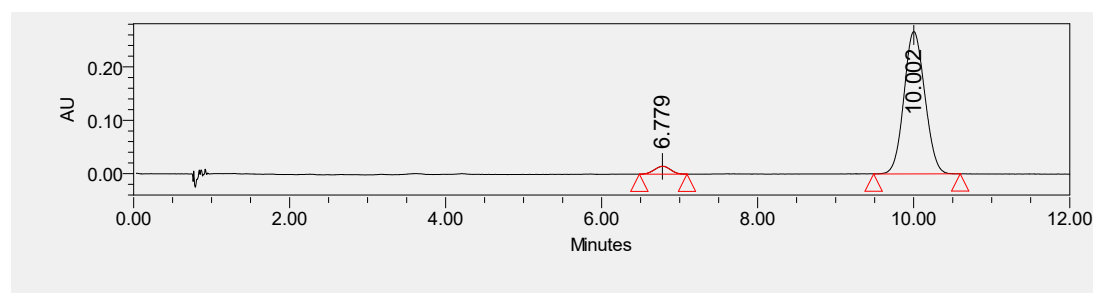

|   | Retention Time | % Area |
|---|----------------|--------|
| 1 | 6.779          | 4.06   |
| 2 | 10.002         | 95.94  |

**3a-Benzyl-2-phenyl-6a-(*p*-tolyl)-3a,6a-dihydro-4*H*-pyrrolo[3,4-*d*]oxazole-4,6(5*H*)-dione (4ab)**

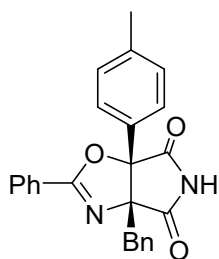

White solid, **M.p.** 98 – 99 °C; 29.6 mg, 75% yield, >95:5 dr, 83% ee.  $[\alpha]_D^{25} = +39.1$  ( $c = 0.58$ , in  $\text{CH}_2\text{Cl}_2$ ).

Dissolved in MeOH for UPC<sup>2</sup>; UPC<sup>2</sup> (Daicel CHIRALPAK OJ-3,  $\text{CO}_2/\text{MeOH} = 90/10$ , flow rate = 1.5 mL/min,  $\lambda = 254$  nm) retention time: 6.9 min, 12.8 min. dr > 95:5 determined by <sup>1</sup>H NMR.

<sup>1</sup>H NMR (400 MHz, Chloroform-*d*)  $\delta = 9.30$  (s, 1H), 8.12 – 8.03 (m, 2H), 7.58 – 7.54 (m, 1H), 7.47 – 7.44 (m, 2H), 7.13 – 7.11 (m, 2H), 7.03 – 6.96 (m, 3H), 6.92 – 6.88 (m, 2H), 6.53 – 6.52 (m, 2H), 3.40 (d,  $J = 14.6$  Hz, 1H), 2.97 (d,  $J = 14.6$  Hz, 1H), 2.39 (s, 3H) ppm.

<sup>13</sup>C{<sup>1</sup>H} NMR (100 MHz, Chloroform-*d*)  $\delta = 175.5, 174.2, 164.1, 139.4, 133.7, 132.8, 130.5, 129.4, 129.1, 128.9, 128.8, 127.5, 126.5, 126.1, 125.8, 91.4, 83.1, 36.7, 21.4$  ppm.

**IR** (neat):  $\nu(\text{cm}^{-1})$  3212, 3063, 3031, 2924, 2761, 1793, 1732, 1642, 1580, 1517, 1496, 1452, 1331, 1215, 1187, 1092, 1066, 1030, 976, 812, 782, 734, 697, 649, 608, 584, 504.

**HRMS** (ESI-FT) calcd for  $\text{C}_{25}\text{H}_{21}\text{N}_2\text{O}_3^+$  ( $[\text{M}] + \text{H}^+$ ) = 397.1547, found 397.1553.

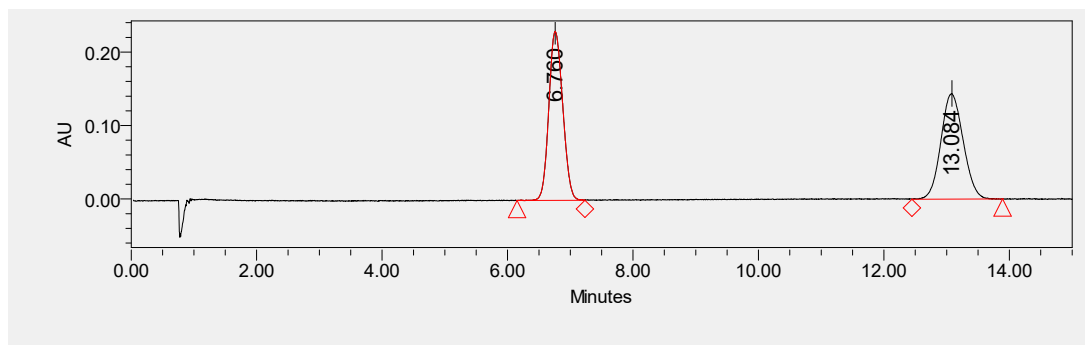

|   | Retention Time | % Area |
|---|----------------|--------|
| 1 | 6.760          | 49.97  |
| 2 | 13.084         | 50.03  |

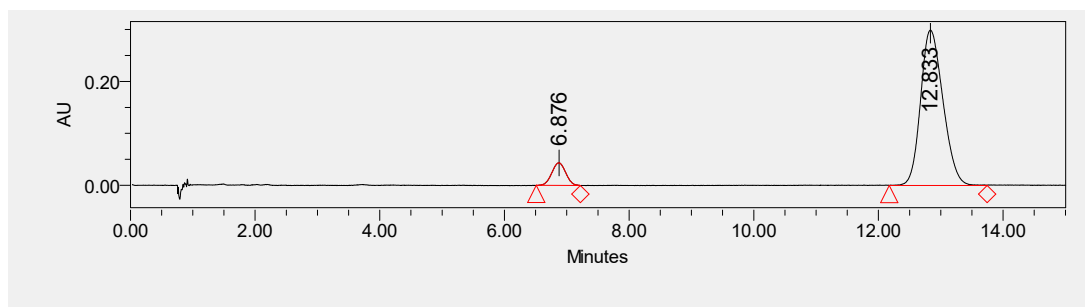

|   | Retention Time | % Area |
|---|----------------|--------|
| 1 | 6.876          | 8.26   |
| 2 | 12.833         | 91.74  |

**3a-Benzyl-6a-(4-ethoxyphenyl)-2-phenyl-3a,6a-dihydro-4H-pyrrolo[3,4-d]oxazole-4,6(5H)-dione (4ac)**

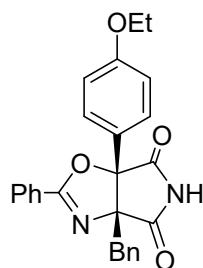

Yellow solid, **M.p.** 96 – 97 °C; 33.2 mg, 78% yield, >95:5 dr, 88% ee.  $[\alpha]^{25}_D = +49.0$  ( $c = 0.73$ , in  $\text{CH}_2\text{Cl}_2$ ).

Dissolved in MeOH for UPC<sup>2</sup>; UPC<sup>2</sup> (Daicel CHIRALPAK **OJ-3**,  $\text{CO}_2/\text{MeOH} = 80/20$ , flow rate = 1.5 mL/min,  $\lambda = 254$  nm) retention time: 3.1 min, 6.9 min. dr > 95:5 determined by <sup>1</sup>H NMR.

<sup>1</sup>H NMR (400 MHz, Chloroform-*d*)  $\delta = 9.33$  (s, 1H), 8.08 – 8.07 (m, 2H), 7.57 – 7.53 (m, 1H), 7.47 – 7.43 (m, 2H), 7.03 – 6.98 (m, 3H), 6.95 – 6.91 (m, 2H), 6.83 – 6.81 (m, 2H), 6.57 – 6.55 (m, 2H), 4.06 (q,  $J = 7.0$  Hz, 2H), 3.39 (d,  $J = 14.6$  Hz, 1H), 3.01 (d,  $J = 14.6$  Hz, 1H), 1.45 (t,  $J = 7.0$  Hz, 3H) ppm.

<sup>13</sup>C{<sup>1</sup>H} NMR (100 MHz, Chloroform-*d*)  $\delta = 175.5, 174.3, 164.1, 159.8, 133.8, 132.8, 130.5, 129.1, 128.8, 127.6, 127.5, 126.5, 125.8, 123.6, 114.7, 91.3, 83.1, 63.8, 36.8, 14.9$  ppm.

**IR** (neat):  $\nu(\text{cm}^{-1})$  3199, 3063, 2981, 2930, 2762, 1792, 1729, 1641, 1614, 1580, 1515, 1496, 1478, 1452, 1392, 1306, 1249, 1217, 1181, 1091, 1066, 1047, 1029, 975, 923, 827, 782, 735, 697, 624, 571, 523, 500, 432.

**HRMS** (ESI-FT) calcd for  $\text{C}_{26}\text{H}_{23}\text{N}_2\text{O}_4^+$  ( $[\text{M}]+\text{H}^+$ ) = 427.1652, found 427.1657.

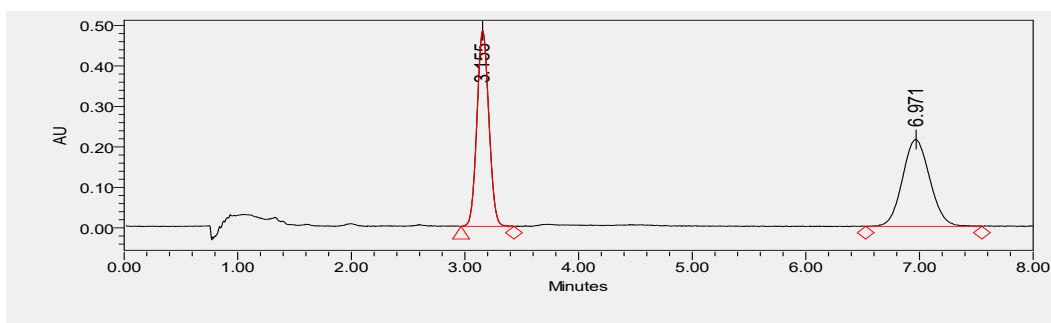

|   | Retention Time | % Area |
|---|----------------|--------|
| 1 | 3.155          | 49.54  |
| 2 | 6.971          | 50.46  |

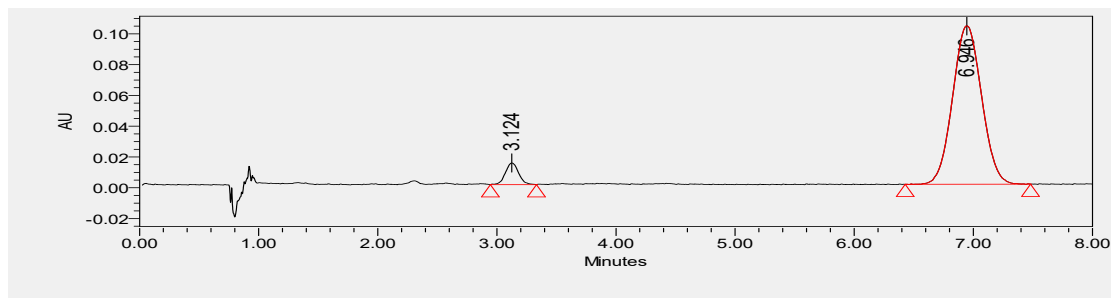

|   | Retention Time | % Area |
|---|----------------|--------|
| 2 | 6.946          | 94.11  |
| 1 | 3.124          | 5.89   |



**6a-([1,1'-biphenyl]-4-yl)-3a-Benzyl-2-phenyl-3a,6a-dihydro-4H-pyrrolo[3,4-d]oxazole-4,6(5H)-dione (4ad)**

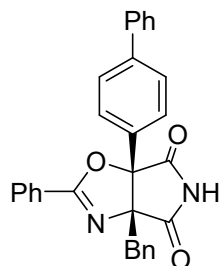

White solid, **M.p.** 116 – 117 °C; 38.5 mg, 84% yield, >95:5 dr, 90% ee.  $[\alpha]^{25}_D = +94.3$  ( $c = 0.57$ , in  $\text{CH}_2\text{Cl}_2$ ).

Dissolved in MeOH for UPC<sup>2</sup>; **UPC<sup>2</sup>** (Daicel CHIRALPAK **OD-3**,  $\text{CO}_2/\text{MeOH} = 80/20$ , flow rate = 1.5 mL/min,  $\lambda = 254$  nm) retention time: 7.6 min, 8.5, min. dr > 95:5 determined by <sup>1</sup>H NMR.

<sup>1</sup>H NMR (400 MHz, Chloroform-*d*)  $\delta = 9.25$  (s, 1H), 8.13 – 8.11 (m, 2H), 7.61 – 7.56 (m, 3H), 7.52 – 7.46 (m, 6H), 7.43 – 7.39 (m, 1H), 7.16 – 7.14 (m, 2H), 7.03 – 7.00 (m, 1H), 6.91 – 6.87 (m, 2H), 6.57 – 6.55 (m, 2H), 3.47 (d,  $J = 14.8$  Hz, 1H), 3.06 (d,  $J = 14.8$  Hz, 1H) ppm.

<sup>13</sup>C{<sup>1</sup>H} NMR (100 MHz, Chloroform-*d*)  $\delta = 175.4, 174.0, 164.2, 142.4, 140.4, 133.7, 132.9, 130.8, 130.3, 129.1, 129.0, 128.8, 128.0, 127.6, 127.4, 127.3, 126.6, 126.5, 125.7, 91.3, 83.5, 36.8$  ppm.

**IR** (neat):  $\nu(\text{cm}^{-1})$  3193, 3061, 3031, 2760, 1792, 1729, 1641, 1602, 1580, 1521, 1491, 1451, 1430, 1405, 1329, 1264, 1215, 1160, 1091, 1066, 1029, 1007, 977, 954, 901, 834, 762, 733, 695, 652, 634, 591, 575, 546, 502, 475, 440.

**HRMS** (ESI-FT) calcd for  $\text{C}_{30}\text{H}_{22}\text{N}_2\text{O}_3\text{K}^+$  ( $[\text{M}] + \text{K}^+$ ) = 497.1262, found 497.1265.

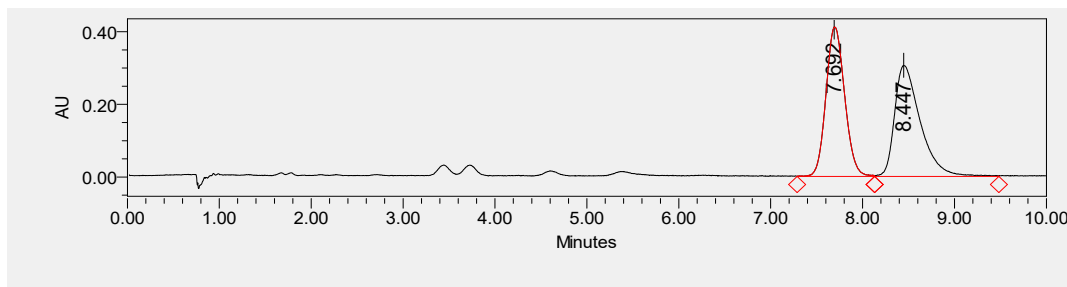

|   | Retention Time | % Area |
|---|----------------|--------|
| 1 | 7.692          | 49.48  |
| 2 | 8.447          | 50.52  |

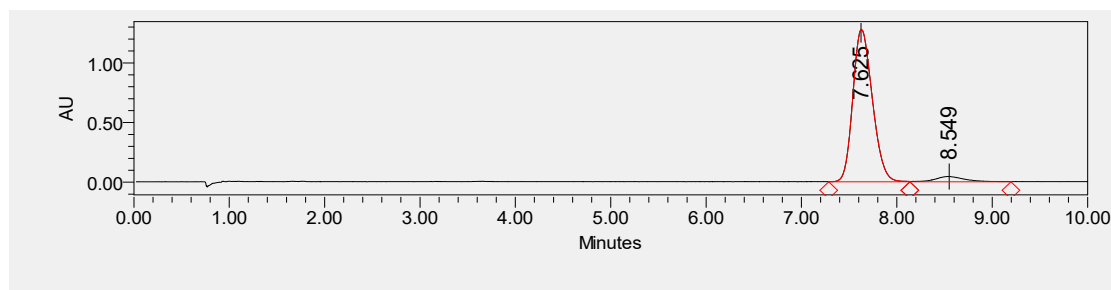

|   | Retention Time | % Area |
|---|----------------|--------|
| 1 | 7.625          | 95.09  |
| 2 | 8.549          | 4.91   |

**3a-Benzyl-6a-(4-chlorophenyl)-2-phenyl-3a,6a-dihydro-4H-pyrrolo[3,4-d]oxazole-4,6(5H)-dione (4ae)**

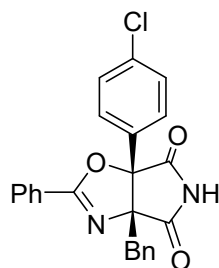

White solid, **M.p.** 90 – 91 °C; 28.1 mg, 67% yield, >95:5 dr, 85% ee.  $[\alpha]_D^{25} = +44.5$  ( $c = 0.53$ , in  $\text{CH}_2\text{Cl}_2$ ).

Dissolved in MeOH for UPC<sup>2</sup>; UPC<sup>2</sup> (Daicel CHIRALPAK **OJ-3**,  $\text{CO}_2/\text{MeOH} = 90/10$ , flow rate = 1.5 mL/min,  $\lambda = 254$  nm) retention time: 8.4 min, 9.2 min. dr > 95:5 determined by <sup>1</sup>H NMR.

<sup>1</sup>H NMR (400 MHz, Chloroform-*d*)  $\delta = 9.34$  (s, 1H), 8.08 – 8.07 (m, 2H), 7.59 – 7.56 (m, 1H), 7.49 – 7.45 (m, 2H), 7.26 – 7.24 (m, 2H), 7.04 – 6.98 (m, 3H), 6.95 – 6.91 (m, 2H), 6.55 – 6.53 (m, 2H), 3.43 (d,  $J = 14.8$  Hz, 1H), 2.98 (d,  $J = 14.8$  Hz, 1H) ppm.

<sup>13</sup>C{<sup>1</sup>H} NMR (100 MHz, Chloroform-*d*)  $\delta = 175.2, 173.6, 164.1, 135.5, 133.5, 133.0, 130.6, 130.1, 129.1, 128.9, 128.9, 127.8, 127.6, 126.7, 125.5, 90.9, 83.4, 36.77$  ppm.

**IR** (neat):  $\nu(\text{cm}^{-1})$  3212, 3063, 2926, 2762, 1793, 1729, 1642, 1601, 1580, 1494, 1452, 1430, 1403, 1330, 1214, 1091, 1066, 1029, 1012, 978, 954, 901, 821, 782, 757, 738, 696, 647, 622, 590, 504, 484, 448.

**HRMS** (ESI-FT) calcd for  $\text{C}_{24}\text{H}_{18}^{34.9659}\text{ClN}_2\text{O}_3^+$  ( $[\text{M}] + \text{H}^+$ ) = 417.1000, found 417.1001.

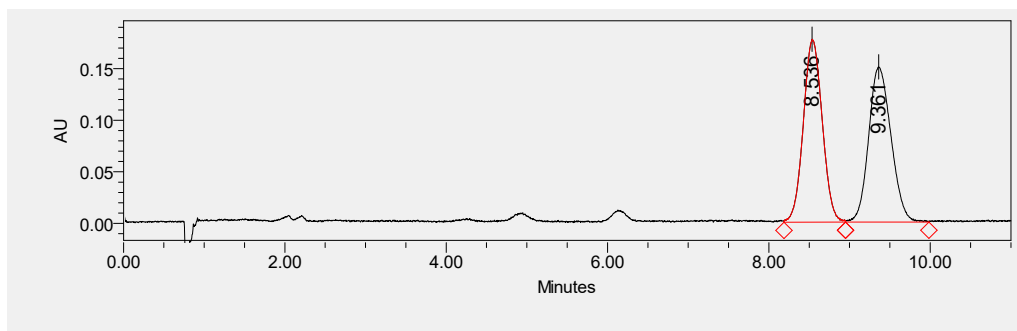

|   | Retention Time | % Area |
|---|----------------|--------|
| 1 | 8.536          | 49.84  |
| 2 | 9.361          | 50.16  |

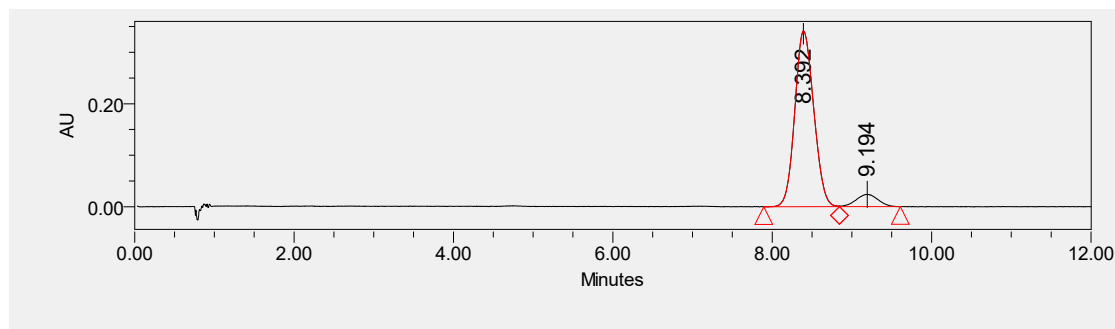

|   | Retention Time | % Area |
|---|----------------|--------|
| 1 | 8.392          | 92.43  |
| 2 | 9.194          | 7.57   |

**3a-Benzyl-6a-(4-iodophenyl)-2-phenyl-3a,6a-dihydro-4H-pyrrolo[3,4-d]oxazole-4,6(5H)-dione (4af)**

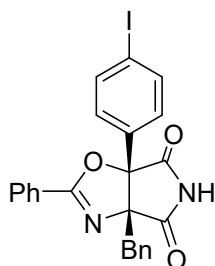

White solid, **M.p.** 113 – 114 °C; 40.2 mg, 79% yield, >95:5 dr, 88% ee.  $[\alpha]_D^{25} = +58.4$  ( $c = 0.78$ , in  $\text{CH}_2\text{Cl}_2$ ).

Dissolved in MeOH for UPC<sup>2</sup>; UPC<sup>2</sup> (Daicel CHIRALPAK **OJ-3**,  $\text{CO}_2/\text{MeOH} = 90/10$ , flow rate = 1.5 mL/min,  $\lambda = 254$  nm) retention time: 14.2 min, 16.5 min. dr > 95:5 determined by <sup>1</sup>H NMR.

<sup>1</sup>H NMR (400 MHz, Chloroform-*d*)  $\delta = 9.38$  (s, 1H), 8.08 – 8.06 (m, 2H), 7.61 – 7.57 (m, 3H), 7.49 – 7.45 (m, 2H), 7.05 – 7.01 (m, 1H), 6.95 – 6.91 (m, 2H), 6.79 – 6.77 (m, 2H), 6.54 – 6.52 (m, 2H), 3.42 (d,  $J = 14.8$  Hz, 1H), 2.98 (d,  $J = 14.8$  Hz, 1H) ppm.

<sup>13</sup>C{<sup>1</sup>H} NMR (100 MHz, Chloroform-*d*)  $\delta = 175.2, 173.5, 164.1, 137.8, 133.5, 133.0, 131.8, 130.1, 129.1, 128.9, 127.9, 127.8, 126.7, 125.5, 95.2, 90.1, 83.4, 36.76$  ppm.

**IR** (neat):  $\nu(\text{cm}^{-1})$  3194, 3062, 2920, 2851, 2761, 1793, 1725, 1641, 1602, 1580, 1489, 1451, 1430, 1394, 1264, 1214, 1161, 1090, 1065, 1028, 1004, 978, 951, 900, 814, 781, 734, 694, 646, 622, 589, 571, 502, 474, 436.

**HRMS** (ESI-FT) calcd for  $\text{C}_{24}\text{H}_{18}\text{IN}_2\text{O}_3^+$  ( $[\text{M}] + \text{H}^+$ ) = 509.0357, found 509.0363.

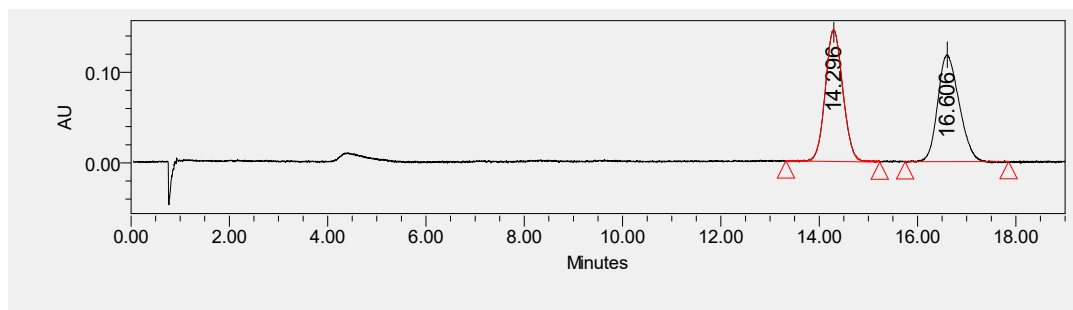

|   | Retention Time | % Area |
|---|----------------|--------|
| 1 | 14.296         | 50.20  |
| 2 | 16.606         | 49.80  |

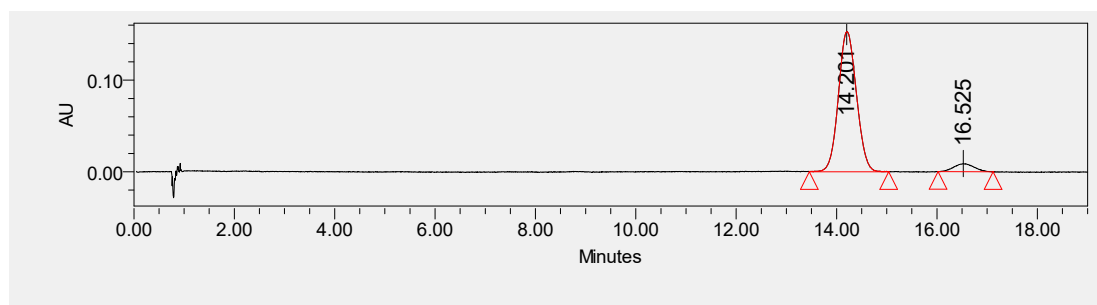

|   | Retention Time | % Area |
|---|----------------|--------|
| 1 | 14.201         | 94.03  |
| 2 | 16.525         | 5.97   |

**3a-Benzyl-2-phenyl-6a-(4-(trifluoromethyl)phenyl)-3a,6a-dihydro-4H-pyrrolo[3,4-d]oxazole-4,6(5H)-dione (4ag)**

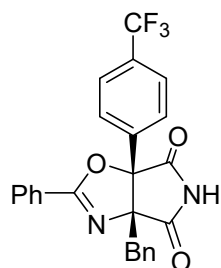

White solid, **M.p.** 93 – 94 °C; 20.3 mg, 45% yield, >95:5 dr, 88% ee.  $[\alpha]_D^{25} = +19.7$  ( $c = 0.30$ , in  $\text{CH}_2\text{Cl}_2$ ).

Dissolved in MeOH for UPC<sup>2</sup>; UPC<sup>2</sup> (Daicel CHIRALPAK OJ-3,  $\text{CO}_2/\text{MeOH} = 95/5$ , flow rate = 1.5 mL/min,  $\lambda = 254$  nm) retention time: 6.9 min, 10.0 min. dr > 95:5 determined by <sup>1</sup>H NMR.

<sup>1</sup>H NMR (400 MHz, Chloroform-*d*)  $\delta = 9.03$  (s, 1H), 8.11 – 8.09 (m, 2H), 7.62 – 7.58 (m, 1H), 7.52 – 7.47 (m, 4H), 7.17 – 7.15 (m, 2H), 7.02 – 6.99 (m, 1H), 6.89 – 6.85 (m, 2H), 6.48 – 6.46 (m, 2H), 3.46 (d,  $J = 15.0$  Hz, 1H), 3.00 (d,  $J = 15.0$  Hz, 1H) ppm.

<sup>13</sup>C{<sup>1</sup>H} NMR (100 MHz, Chloroform-*d*)  $\delta = 174.8, 173.1, 164.1, 136.0, 133.4, 133.2, 129.9, 129.2, 129.0, 127.9, 126.7, 126.6, 125.6$  (q,  $J = 3.7$  Hz), 125.4, 125.1, 122.4, 90.8, 83.8, 36.8 ppm.

<sup>19</sup>F{<sup>1</sup>H} NMR (376 MHz, Chloroform-*d*)  $\delta = -62.82$  ppm.

**IR** (neat):  $\nu(\text{cm}^{-1})$  3221, 3066, 2927, 2764, 1795, 1734, 1644, 1581, 1496, 1452, 1414, 1326, 1215, 1170, 1125, 1092, 1070, 1029, 1015, 980, 835, 781, 753, 695, 647, 607, 503, 441.

**HRMS** (ESI-FT) calcd for  $\text{C}_{25}\text{H}_{18}\text{F}_3\text{N}_2\text{O}_3^+$  ( $[\text{M}] + \text{H}^+$ ) = 451.1264, found 451.1260.

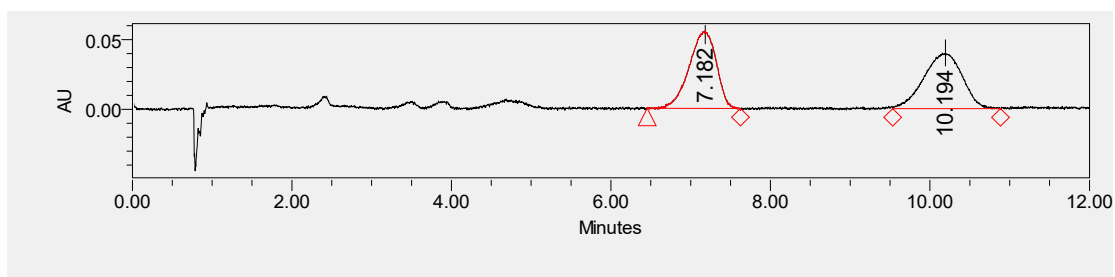

|   | Retention Time | % Area |
|---|----------------|--------|
| 1 | 7.182          | 49.60  |
| 2 | 10.194         | 50.40  |

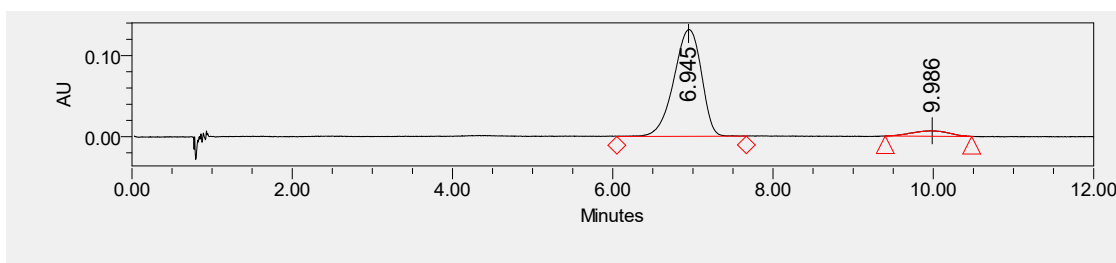

|   | Retention Time | % Area |
|---|----------------|--------|
| 2 | 9.986          | 6.25   |
| 1 | 6.945          | 93.75  |



**Methyl 4-(3a-benzyl-4,6-dioxo-2-phenyl-3a,4,5,6-tetrahydro-6aH-pyrrolo[3,4-d]oxazol-6a-yl)benzoate (4ah)**

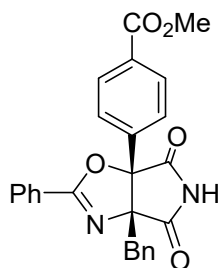

White solid, **M.p.** 102 – 103 °C; 24.9 mg, 57% yield, >95:5 dr, 87% ee.  $[\alpha]_D^{25} = +64.6$  ( $c = 0.40$ , in  $\text{CH}_2\text{Cl}_2$ ).

Dissolved in MeOH for UPC<sup>2</sup>; UPC<sup>2</sup> (Daicel CHIRALPAK **OJ-3**,  $\text{CO}_2/\text{MeOH} = 90/10$ , flow rate = 1.5 mL/min,  $\lambda = 254$  nm) retention time: 11.6 min, 15.5 min. dr > 95:5 determined by <sup>1</sup>H NMR.

<sup>1</sup>H NMR (400 MHz, Chloroform-*d*)  $\delta = 9.27$  (s, 1H), 8.09 – 8.08 (m, 2H), 7.97 – 7.95 (m, 2H), 7.60 – 7.56 (m, 1H), 7.49 – 7.46 (m, 2H), 7.17 – 7.15 (m, 2H), 7.02 – 6.98 (m, 1H), 6.88 – 6.84 (m, 2H), 6.48 – 6.46 (m, 2H), 3.97 (s, 3H), 3.47 (d,  $J = 14.8$  Hz, 1H), 2.96 (d,  $J = 14.8$  Hz, 1H) ppm.

<sup>13</sup>C{<sup>1</sup>H} NMR (100 MHz, Chloroform-*d*)  $\delta = 175.0, 173.4, 164.1, 136.9, 133.3, 133.1, 131.0, 130.2, 129.9, 129.1, 128.9, 127.7, 126.7, 126.4, 125.5, 91.1, 83.6, 52.6, 36.6$  ppm.

**IR** (neat):  $\nu(\text{cm}^{-1})$  3199, 3064, 2953, 2762, 1794, 1726, 1643, 1580, 1495, 1452, 1436, 1410, 1329, 1282, 1215, 1195, 1112, 1091, 1066, 1030, 1015, 957, 902, 852, 827, 772, 733, 697, 647, 591, 504, 439.

**HRMS** (ESI-FT) calcd for  $\text{C}_{26}\text{H}_{21}\text{N}_2\text{O}_5^+$  ( $[\text{M}] + \text{H}^+$ ) = 441.1445, found 441.1447.

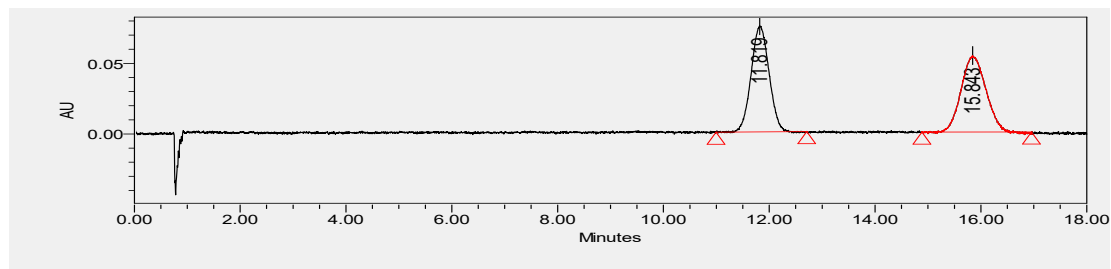

|   | Retention Time | % Area |
|---|----------------|--------|
| 1 | 11.819         | 50.18  |
| 2 | 15.843         | 49.82  |

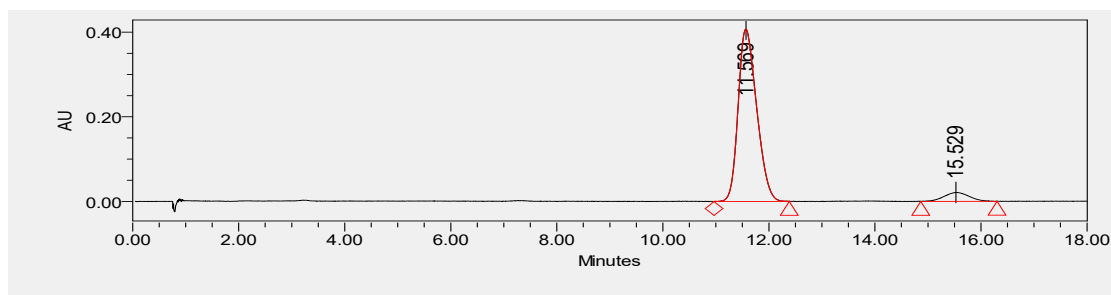

|   | Retention Time | % Area |
|---|----------------|--------|
| 1 | 11.569         | 93.42  |
| 2 | 15.529         | 6.58   |

**3a-Benzyl-2-phenyl-6a-(*o*-tolyl)-3a,6a-dihydro-4*H*-pyrrolo[3,4-*d*]oxazole-4,6(5*H*)-dione (4ai)**

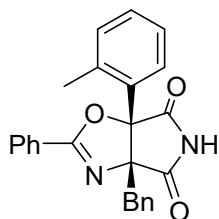

White solid, **M.p.** 88 – 89 °C; 34.6 mg, 87% yield, >95:5 dr, 88% ee.  $[\alpha]_D^{25} = +22.8$  ( $c = 0.69$ , in  $\text{CH}_2\text{Cl}_2$ ).

Dissolved in MeOH for UPC<sup>2</sup>; UPC<sup>2</sup> (Daicel CHIRALPAK **OD-3**,  $\text{CO}_2/\text{MeOH} = 90/10$ , flow rate = 1.5 mL/min,  $\lambda = 254$  nm) retention time: 7.2 min, 8.8 min. dr > 95:5 determined by <sup>1</sup>H NMR.

<sup>1</sup>H NMR (400 MHz, Chloroform-*d*)  $\delta$ =9.33 (s, 1H), 8.10 – 8.08 (m, 2H), 7.58 – 7.55 (m, 1H), 7.49 – 7.45 (m, 2H), 7.24 – 7.18 (m, 2H), 7.02 – 6.98 (m, 1H), 6.95 – 6.88 (m, 3H), 6.81 (s, 1H), 6.49 – 6.48 (m, 2H), 3.45 (d,  $J = 14.6$  Hz, 1H), 2.97 (d,  $J = 14.6$  Hz, 1H), 2.26 (s, 3H) ppm.

<sup>13</sup>C{<sup>1</sup>H} NMR (100 MHz, Chloroform-*d*)  $\delta$ = 175.5, 174.3, 164.1, 138.6, 133.6, 132.8, 131.7, 130.5, 130.1, 129.1, 128.8, 128.7, 127.4, 127.1, 126.5, 125.8, 123.1, 91.4, 83.1, 36.6, 21.5 ppm.

**IR** (neat):  $\nu(\text{cm}^{-1})$  3195, 3062, 2921, 2759, 1792, 1729, 1641, 1607, 1580, 1494, 1451, 1330, 1269, 1222, 1179, 1091, 1067, 1029, 1000, 976, 836, 782, 735, 696, 642, 623, 577, 526, 497, 472, 437.

**HRMS** (ESI-FT) calcd for  $\text{C}_{25}\text{H}_{21}\text{N}_2\text{O}_3^+$  ( $[\text{M}]+\text{H}^+$ ) = 397.1547, found 397.1549.

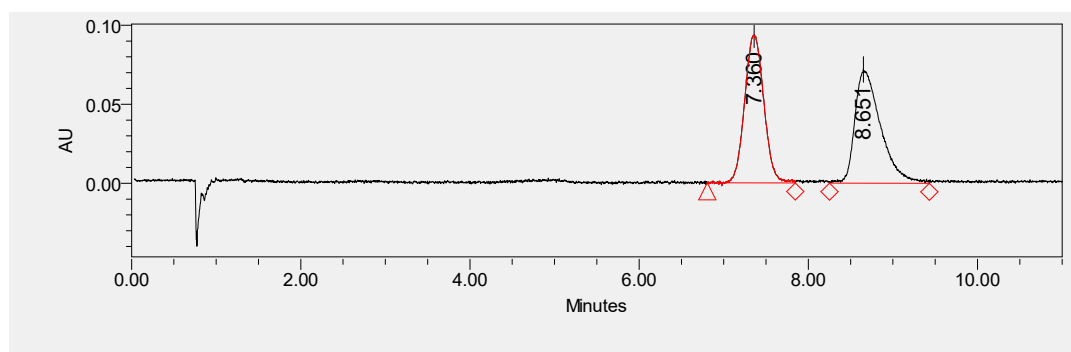

|   | Retention Time | % Area |
|---|----------------|--------|
| 1 | 7.360          | 49.42  |
| 2 | 8.651          | 50.58  |

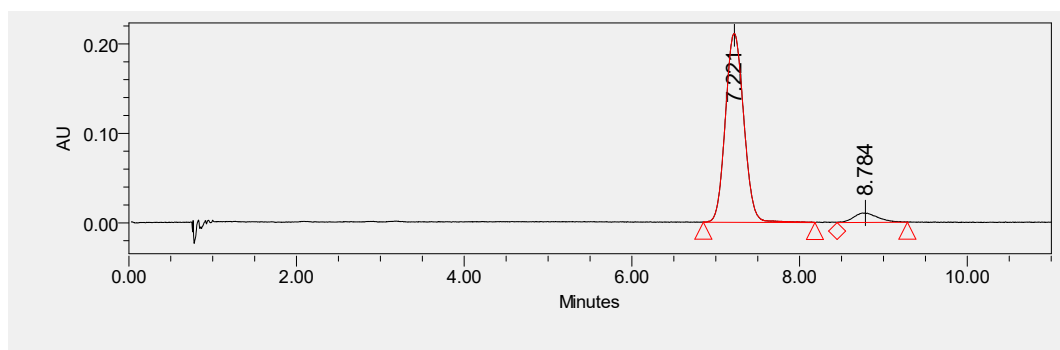

|   | Retention Time | % Area |
|---|----------------|--------|
| 1 | 7.221          | 93.78  |
| 2 | 8.784          | 6.22   |

**3a-Benzyl-6a-(2-methoxyphenyl)-2-phenyl-3a,6a-dihydro-4H-pyrrolo[3,4-d]oxazole-4,6(5H)-dione (4aj)**

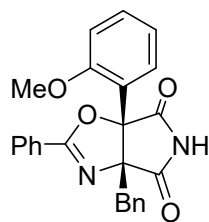

White solid, **M.p.** 108 – 109 °C; 36.3 mg, 88% yield, >95:5 dr, 92% ee.  $[\alpha]_D^{25} = +98.1$  ( $c = 0.75$ , in  $\text{CH}_2\text{Cl}_2$ ).

Dissolved in MeOH for UPC<sup>2</sup>; UPC<sup>2</sup> (Daicel CHIRALPAK **OJ-3**,  $\text{CO}_2/\text{MeOH} = 90/10$ , flow rate = 1.5 mL/min,  $\lambda = 254$  nm) retention time: 3.9 min, 4.7 min. dr > 95:5 determined by <sup>1</sup>H NMR.

<sup>1</sup>H NMR (400 MHz, Chloroform-*d*)  $\delta = 8.85$  (s, 1H), 8.06 – 8.05 (m, 2H), 7.56 – 7.52 (m, 1H), 7.46 – 7.38 (m, 3H), 7.12 – 7.09 (m, 1H), 7.00 – 6.93 (m, 2H), 6.87 – 6.83 (m, 3H), 6.49 – 6.47 (m, 2H), 3.85 (s, 3H), 3.70 (d,  $J = 14.6$  Hz, 1H), 2.75 (d,  $J = 14.6$  Hz, 1H) ppm.

<sup>13</sup>C{<sup>1</sup>H} NMR (100 MHz, Chloroform-*d*)  $\delta = 175.6, 174.5, 163.2, 155.0, 134.2, 132.6, 130.7, 129.0, 128.7, 128.2, 127.2, 126.2, 126.0, 121.7, 121.6, 111.1, 90.2, 82.5, 55.6, 35.9$  ppm.

**IR** (neat):  $\nu(\text{cm}^{-1})$  3213, 3062, 2940, 2841, 2765, 1793, 1724, 1645, 1603, 1582, 1493, 1452, 1331, 1293, 1256, 1215, 1182, 1163, 1124, 1091, 1067, 1023, 976, 954, 753, 737, 696, 638, 596, 572, 509, 477, 456, 430.

**HRMS** (ESI-FT) calcd for  $\text{C}_{25}\text{H}_{21}\text{N}_2\text{O}_4^+$  ( $[\text{M}] + \text{H}^+$ ) = 413.1496, found 413.1501.

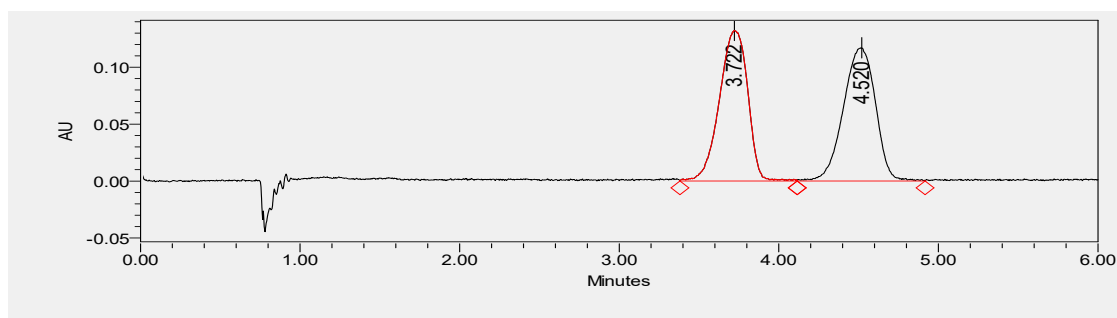

|   | Retention Time | % Area |
|---|----------------|--------|
| 1 | 3.722          | 49.91  |
| 2 | 4.520          | 50.09  |

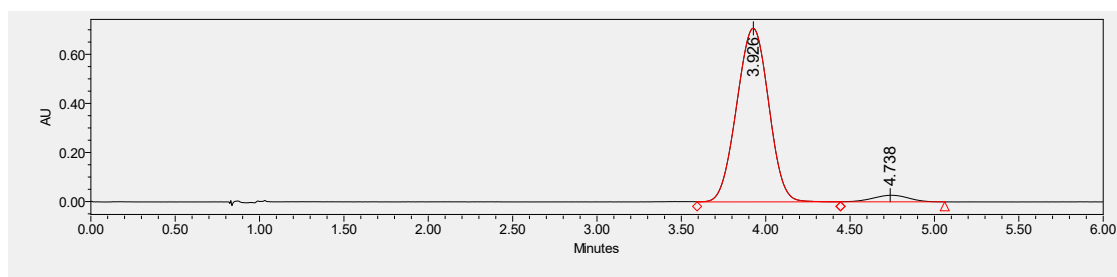

|   | Retention Time | % Area |
|---|----------------|--------|
| 1 | 3.926          | 95.91  |
| 2 | 4.738          | 4.09   |

**3a-Benzyl-6a-(2-fluorophenyl)-2-phenyl-3a,6a-dihydro-4H-pyrrolo[3,4-d]oxazole-4,6(5H)-dione (4ak)**

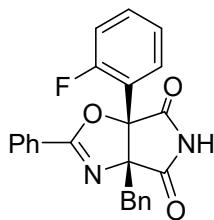

White solid, **M.p.** 88 – 89 °C; 26.9 mg, 67% yield, >95:5 dr, 79% ee.  $[\alpha]_D^{25} = +40.1$  ( $c = 0.30$ , in  $\text{CH}_2\text{Cl}_2$ ).

Dissolved in MeOH for UPC<sup>2</sup>; UPC<sup>2</sup> (Daicel CHIRALPAK OJ-3,  $\text{CO}_2/\text{MeOH} = 90/10$ , flow rate = 1.5 mL/min,  $\lambda = 254$  nm) retention time: 4.7 min, 5.8 min. dr > 95:5 determined by <sup>1</sup>H NMR.

<sup>1</sup>H NMR (400 MHz, Chloroform-*d*)  $\delta = 8.75$  (s, 1H), 8.08 – 8.02 (m, 2H), 7.59 – 7.55 (m, 1H), 7.49 – 7.45 (m, 2H), 7.43 – 7.39 (m, 1H), 7.21 – 7.17 (m, 1H), 7.13 – 7.09 (m, 1H), 7.03 – 6.95 (m, 2H), 6.88 – 6.84 (m, 2H), 6.54 – 6.52 (m, 2H), 3.76 (d,  $J = 15.0$  Hz, 1H), 2.82 (d,  $J = 15.0$  Hz, 1H) ppm.

<sup>13</sup>C{<sup>1</sup>H} NMR (100 MHz, Chloroform-*d*)  $\delta = 174.6, 172.9, 163.3, 133.7, 132.9, 131.4, 131.3, 129.1, 128.9$  (d,  $J = 286.0$  Hz), 128.8, 126.5, 125.6, 124.9, 124.8, 120.8, 120.6, 115.7 (d,  $J = 20.1$  Hz), 88.9, 83.0, 36.1 ppm.

<sup>19</sup>F{<sup>1</sup>H} NMR (376 MHz, Chloroform-*d*)  $\delta = -111.18$  ppm.

**IR** (neat):  $\nu(\text{cm}^{-1})$  3213, 3064, 2763, 1796, 1730, 1645, 1603, 1582, 1491, 1454, 1329, 1288, 1221, 1198, 1160, 1089, 1066, 1027, 977, 953, 815, 759, 735, 695, 655, 635, 575, 541, 497, 456.

**HRMS** (ESI-FT) calcd for  $\text{C}_{24}\text{H}_{18}\text{FN}_2\text{O}_3^+$  ( $[\text{M}] + \text{H}^+$ ) = 439.1264, found 439.1263.

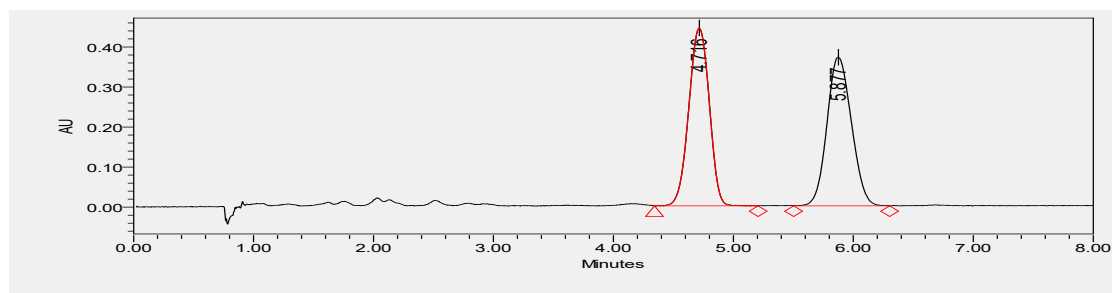

|   | Retention Time | % Area |
|---|----------------|--------|
| 1 | 4.716          | 50.02  |
| 2 | 5.877          | 49.98  |

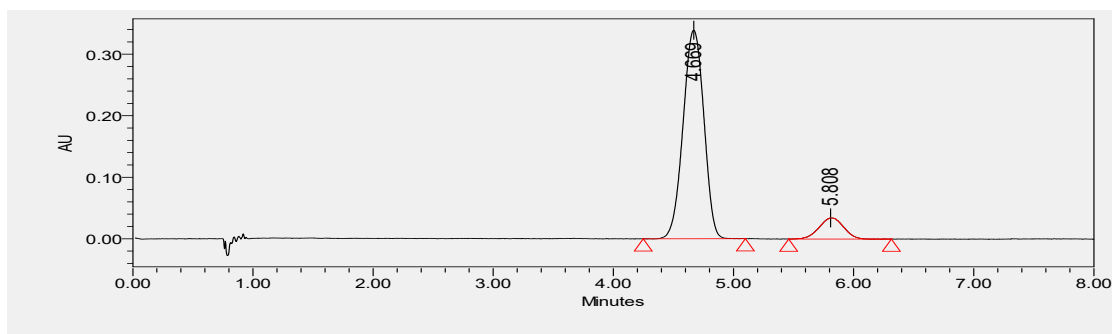

|   | Retention Time | % Area |
|---|----------------|--------|
| 1 | 4.669          | 89.28  |
| 2 | 5.808          | 10.72  |

**3a-Benzyl-6a-(3-bromophenyl)-2-phenyl-3a,6a-dihydro-4H-pyrrolo[3,4-d]oxazole-4,6(5H)-dione (4a)**

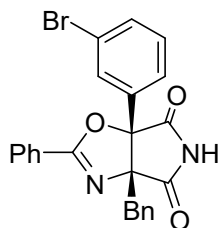

White solid, **M.p.** 109 – 110 °C; 23.4 mg, 51% yield, >95:5 dr, 86% ee.  $[\alpha]_D^{25} = +20.9$  ( $c = 1.21$ , in  $\text{CH}_2\text{Cl}_2$ ).

Dissolved in MeOH for UPC<sup>2</sup>; UPC<sup>2</sup> (Daicel CHIRALPAK **OJ-3**,  $\text{CO}_2/\text{MeOH} = 90/10$ , flow rate = 1.5 mL/min,  $\lambda = 254$  nm) retention time: 6.8 min, 8.6 min. dr > 95:5 determined by <sup>1</sup>H NMR.

<sup>1</sup>H NMR (400 MHz, Chloroform-*d*)  $\delta = 9.58$  (s, 1H), 8.09 – 8.07 (m, 2H), 7.59 – 7.56 (m, 1H), 7.53– 7.45 (m, 3H), 7.22 – 7.18 (m, 1H), 7.14 (s, 1H), 7.05 – 7.03 (m, 2H), 6.96 – 6.92 (m, 2H), 6.52 – 6.50 (m, 2H), 3.50 (d,  $J = 14.8$  Hz, 1H), 2.96 (d,  $J = 14.8$  Hz, 1H) ppm.

<sup>13</sup>C{<sup>1</sup>H} NMR (100 MHz, Chloroform-*d*)  $\delta = 175.3, 173.6, 164.1, 134.1, 133.2, 133.0, 132.5, 130.2, 130.1, 129.7, 129.1, 128.9, 127.7, 126.8, 125.4, 124.6, 123.2, 90.6, 83.3, 36.6$  ppm.

**IR** (neat):  $\nu(\text{cm}^{-1})$  3120, 3063, 2760, 1793, 1725, 1641, 1600, 1578, 1495, 1476, 1452, 1428, 1329, 1264, 1214, 1090, 1067, 1028, 999, 977, 879, 783, 759, 737, 695, 639, 622, 576, 498, 472, 434.

**HRMS** (ESI-FT) calcd for  $\text{C}_{24}\text{H}_{18}^{78,9183}\text{BrN}_2\text{O}_3^+$  ( $[\text{M}]+\text{H}^+$ ) = 461.0495, found 461.0497,  $\text{C}_{24}\text{H}_{18}^{80,9163}\text{BrN}_2\text{O}_3^+$  ( $[\text{M}]+\text{H}^+$ ) = 463.0475, found 463.0474.

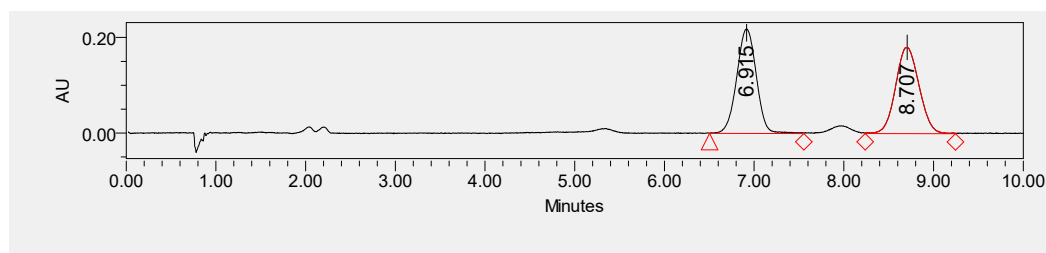

|   | Retention Time | % Area |
|---|----------------|--------|
| 1 | 6.915          | 50.24  |
| 2 | 8.707          | 49.76  |

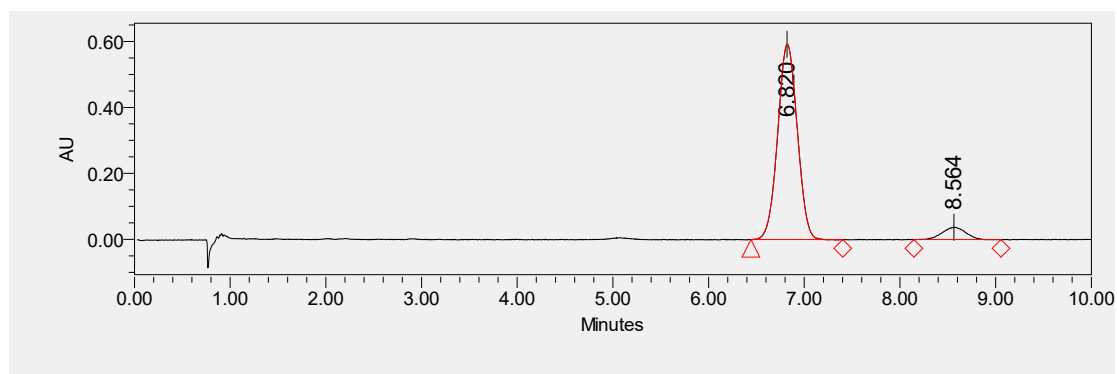

|   | Retention Time | % Area |
|---|----------------|--------|
| 1 | 6.820          | 92.86  |
| 2 | 8.564          | 7.14   |

**6a-(Benzo[*d*][1,3]dioxol-5-yl)-3a-benzyl-2-phenyl-3a,6a-dihydro-4*H*-pyrrolo[3,4-*d*]oxazole-4,6(5*H*)-dione (4am)**

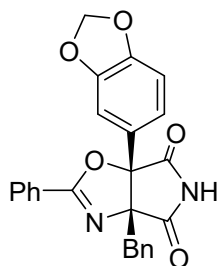

White solid, **M.p.** 105 – 106 °C; 33.9 mg, 80% yield, >95:5 dr, 88% ee.  $[\alpha]_D^{25} = +41.2$  ( $c = 0.79$ , in  $\text{CH}_2\text{Cl}_2$ ).

Dissolved in MeOH for UPC<sup>2</sup>; **UPC<sup>2</sup>** (Daicel CHIRALPAK **OJ-3**,  $\text{CO}_2/\text{MeOH} = 90/10$ , flow rate = 1.5 mL/min,  $\lambda = 254$  nm) retention time: 11.2 min, 12.8 min. dr > 95:5 determined by <sup>1</sup>H NMR.

**<sup>1</sup>H NMR** (400 MHz, Chloroform-*d*)  $\delta = 9.36$  (s, 1H), 8.08 – 8.06 (m, 2H), 7.58 – 7.54 (m, 1H), 7.48 – 7.44 (m, 2H), 7.05 – 7.02 (m, 1H), 6.98 – 6.95 (m, 2H), 6.76 – 6.74 (m, 1H), 6.65 – 6.63 (m, 2H), 6.60 – 6.57 (m, 1H), 6.49 – 6.48 (m, 1H), 5.99 – 5.98 (m, 2H), 3.43 (d,  $J = 14.8$  Hz, 1H), 3.02 (d,  $J = 14.8$  Hz, 1H) ppm.

**<sup>13</sup>C{<sup>1</sup>H} NMR** (100 MHz, Chloroform-*d*)  $\delta = 175.4, 174.1, 164.0, 148.5, 148.2, 133.9, 132.9, 130.3, 129.1, 128.8, 127.6, 126.6, 125.6, 125.6, 120.0, 108.5, 107.2, 101.6, 91.2, 83.3, 36.8$  ppm.

**IR** (neat):  $\nu(\text{cm}^{-1})$  3196, 3063, 2771, 1792, 1731, 1642, 1580, 1493, 1449, 1330, 1284, 1250, 1146, 1108, 1091, 977, 933, 871, 812, 782, 734, 696, 644, 621, 573, 499, 472, 422.

**HRMS** (ESI-FT) calcd for  $\text{C}_{25}\text{H}_{19}\text{N}_2\text{O}_5^+$  ( $[\text{M}] + \text{H}^+$ ) = 427.1288, found 427.1287.

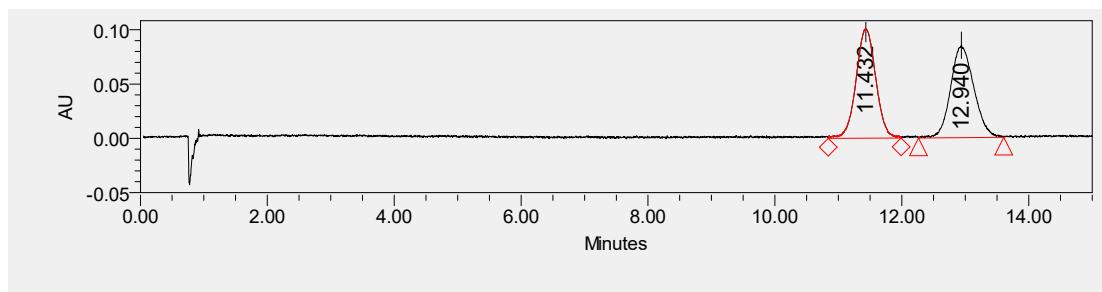

|   | Retention Time | % Area |
|---|----------------|--------|
| 1 | 11.432         | 50.26  |
| 2 | 12.940         | 49.74  |

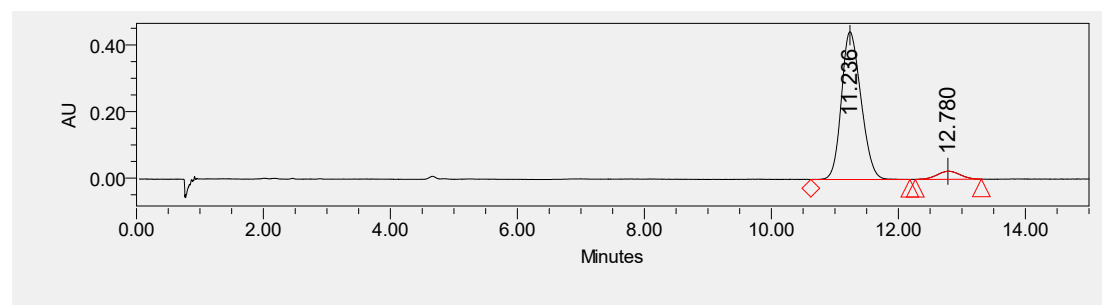

|   | Retention Time | % Area |
|---|----------------|--------|
| 1 | 11.236         | 93.92  |
| 2 | 12.780         | 6.08   |

**3a-Benzyl-6a-(naphthalen-1-yl)-2-phenyl-3a,6a-dihydro-4H-pyrrolo[3,4-d]oxazole-4,6(5H)-dione (4an)**

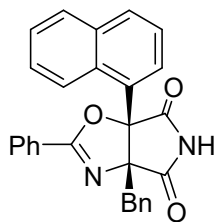

White solid, **M.p.** 114 – 115 °C; 16.7 mg, 39% yield, >95:5 dr, 88% ee.  $[\alpha]_D^{25} = +172.7$  ( $c = 0.26$ , in  $\text{CH}_2\text{Cl}_2$ ).

Dissolved in MeOH for UPC<sup>2</sup>; UPC<sup>2</sup> (Daicel CHIRALPAK **OJ-3**,  $\text{CO}_2/\text{MeOH} = 90/10$ , flow rate = 1.5 mL/min,  $\lambda = 254$  nm) retention time: 9.3 min, 14.1 min. dr > 95:5 determined by <sup>1</sup>H NMR.

**<sup>1</sup>H NMR** (400 MHz, Chloroform-*d*)  $\delta = 8.99$  (s, 1H), 8.16 – 8.15 (m, 2H), 8.00 – 7.98 (m, 1H), 7.90 – 7.88 (m, 1H), 7.62 – 7.58 (m, 4H), 7.52 – 7.48 (m, 2H), 7.39 – 7.37 (m, 1H), 7.25 – 7.21 (m, 1H), 6.89 – 6.85 (m, 1H), 6.74 – 6.70 (m, 2H), 6.13 – 6.11 (m, 2H), 3.73 (d,  $J = 14.8$  Hz, 1H), 2.78 (d,  $J = 14.8$  Hz, 1H) ppm.

**<sup>13</sup>C{<sup>1</sup>H} NMR** (100 MHz, Chloroform-*d*)  $\delta = 175.0, 173.3, 163.1, 134.3, 133.9, 132.9, 130.5, 130.1, 130.0, 129.5, 129.1, 128.9, 128.0, 127.4, 127.2, 127.0, 126.2, 126.0, 125.8, 125.4, 122.8, 91.4, 83.5, 35.9$  ppm.

**IR** (neat):  $\nu(\text{cm}^{-1})$  3193, 3061, 2758, 1792, 1733, 1646, 1601, 1580, 1513, 1496, 1452, 1329, 1216, 1178, 1109, 1093, 1073, 1028, 984, 931, 857, 798, 775, 754, 734, 696, 641, 622, 528, 489, 417.

**HRMS** (ESI-FT) calcd for  $\text{C}_{28}\text{H}_{21}\text{N}_2\text{O}_3^+$  ( $[\text{M}+\text{H}^+]$ ) = 433.1547, found 433.1547.

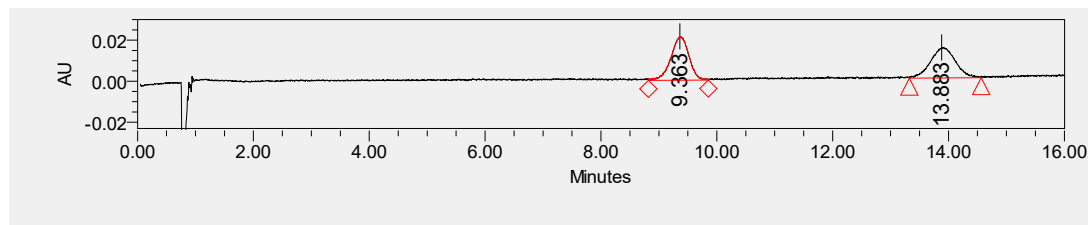

|   | Retention Time | % Area |
|---|----------------|--------|
| 1 | 9.363          | 50.81  |
| 2 | 13.883         | 49.19  |

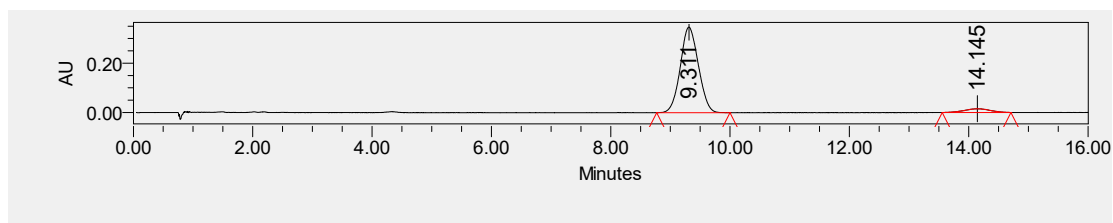

|   | Retention Time | % Area |
|---|----------------|--------|
| 1 | 9.311          | 94.07  |
| 2 | 14.145         | 5.93   |

**3a-Benzyl-6a-(naphthalen-2-yl)-2-phenyl-3a,6a-dihydro-4H-pyrrolo[3,4-*d*]oxazole-4,6(5H)-dione (4a)**

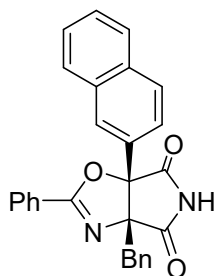

White solid, **M.p.** 128 – 129 °C; 32.2 mg, 75% yield, >95:5 dr, 85% ee.  $[\alpha]_D^{25} = +93.4$  ( $c = 0.47$ , in  $\text{CH}_2\text{Cl}_2$ ).

Dissolved in MeOH for UPC<sup>2</sup>; UPC<sup>2</sup> (Daicel CHIRALPAK **OJ-3**,  $\text{CO}_2/\text{MeOH} = 80/20$ , flow rate = 1.5 mL/min,  $\lambda = 254$  nm) retention time: 5.2 min, 7.4 min. dr > 95:5 determined by <sup>1</sup>H NMR.

<sup>1</sup>H NMR (400 MHz, Chloroform-*d*)  $\delta = 9.28$  (s, 1H), 8.16 – 8.13 (m, 2H), 7.88 – 7.82 (m, 2H), 7.69 – 7.67 (m, 1H), 7.61 – 7.48 (m, 6H), 7.20 – 7.18 (m, 1H), 6.90 – 6.86 (m, 1H), 6.68 – 6.64 (m, 2H), 6.36 – 6.34 (m, 2H), 3.46 (d,  $J = 14.6$  Hz, 1H), 3.02 (d,  $J = 14.6$  Hz, 1H) ppm.

<sup>13</sup>C{<sup>1</sup>H} NMR (100 MHz, Chloroform-*d*)  $\delta = 175.4, 174.0, 164.2, 133.4, 133.3, 133.0, 132.9, 130.3, 129.2, 128.9, 128.8, 128.7, 128.5, 127.8, 127.4, 127.2, 127.0, 126.6, 126.5, 125.8, 122.8, 91.6, 83.1, 36.8$  ppm.

**IR** (neat):  $\nu(\text{cm}^{-1})$  3217, 3061, 2760, 1793, 1731, 1642, 1602, 1580, 1495, 1452, 1431, 1330, 1273, 1215, 1186, 1131, 1092, 1067, 1029, 978, 935, 905, 858, 816, 781, 743, 696, 647, 624, 495, 476.

**HRMS** (ESI-FT) calcd for  $\text{C}_{28}\text{H}_{21}\text{N}_2\text{O}_3^+$  ( $[\text{M}+\text{H}^+]$ ) = 433.1547, found 433.1549.

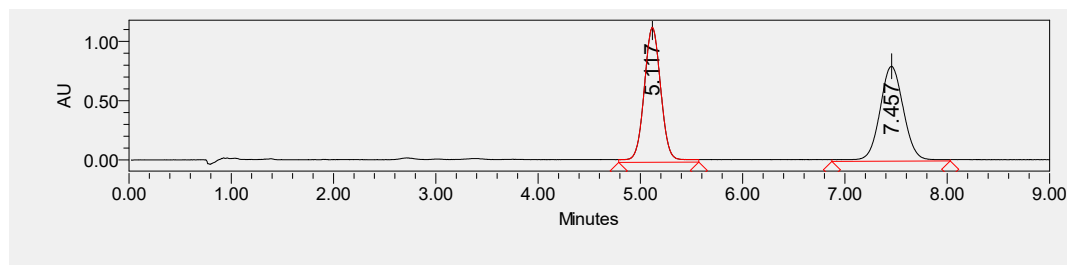

|   | Retention Time | % Area |
|---|----------------|--------|
| 1 | 5.117          | 50.16  |
| 2 | 7.457          | 49.84  |

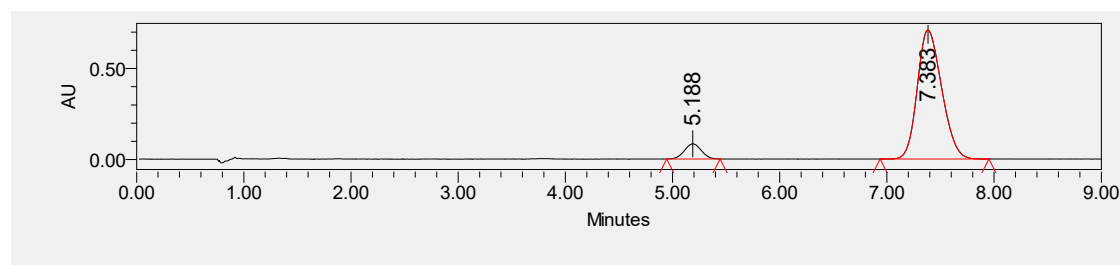

|   | Retention Time | % Area |
|---|----------------|--------|
| 1 | 5.188          | 7.59   |
| 2 | 7.383          | 92.41  |



**3a-Benzyl-6a-(furan-2-yl)-2-phenyl-3a,6a-dihydro-4H-pyrrolo[3,4-d]oxazole-4,6(5H)-dione (4ap)**

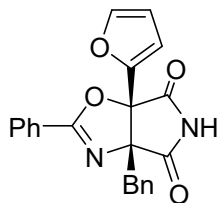

White solid, **M.p.** 82 – 83 °C; 18.6 mg, 50% yield, >95:5 dr, 86% ee.  $[\alpha]_{436}^{25} = -37.1$  ( $c = 0.55$ , in  $\text{CH}_2\text{Cl}_2$ ).

Dissolved in MeOH for UPC<sup>2</sup>; UPC<sup>2</sup> (Daicel CHIRALPAK **OJ-3**,  $\text{CO}_2/\text{MeOH} = 90/10$ , flow rate = 1.5 mL/min,  $\lambda = 254$  nm) retention time: 4.9 min, 6.9 min. dr > 95:5 determined by <sup>1</sup>H NMR.

<sup>1</sup>H NMR (400 MHz, Chloroform-*d*)  $\delta$ =9.05 (s, 1H), 8.04 – 8.02 (m, 2H), 7.57 – 7.51 (m, 2H), 7.46 – 7.42 (m, 2H), 7.10 – 7.00 (m, 3H), 6.76 – 6.74 (m, 2H), 6.39 – 6.38 (m, 1H), 6.35 – 6.34 (m, 1H), 3.43 (m, 2H) ppm.

<sup>13</sup>C{<sup>1</sup>H} NMR (100 MHz, Chloroform-*d*)  $\delta$ = 174.7, 171.1, 163.7, 144.3, 144.0, 133.8, 132.9, 129.8, 129.1, 128.7, 127.9, 127.0, 125.6, 112.5, 111.3, 86.4, 83.6, 37.2 ppm.

**IR** (neat):  $\nu(\text{cm}^{-1})$  3200, 3064, 2763, 1794, 1732, 1643, 1603, 1580, 1496, 1452, 1329, 1294, 1267, 1235, 1216, 1154, 1094, 1066, 1030, 1005, 961, 886, 819, 782, 741, 696, 640, 594, 501, 431.

**HRMS** (ESI-FT) calcd for  $\text{C}_{22}\text{H}_{17}\text{N}_2\text{O}_4^+$  ( $[\text{M}+\text{H}^+]$ ) = 373.1183, found 373.1183.

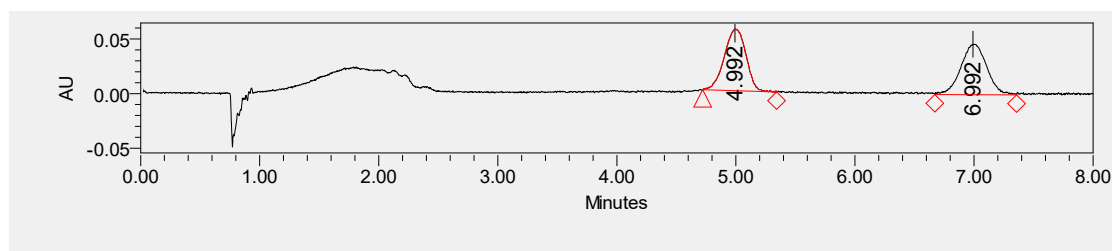

|   | Retention Time | % Area |
|---|----------------|--------|
| 1 | 4.992          | 50.33  |
| 2 | 6.992          | 49.67  |

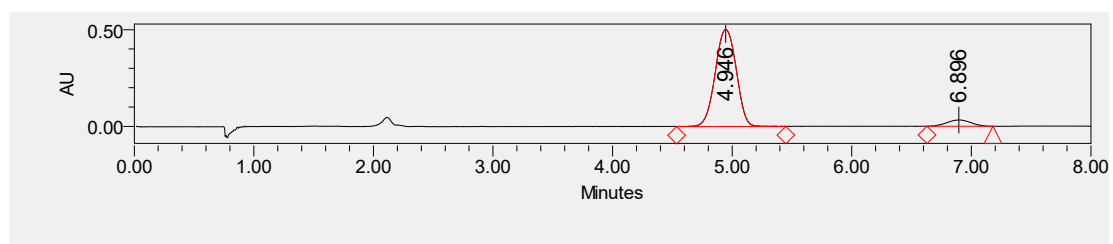

|   | Retention Time | % Area |
|---|----------------|--------|
| 1 | 4.946          | 92.99  |
| 2 | 6.896          | 7.01   |

**3a-Benzyl-6a-(furan-3-yl)-2-phenyl-3a,6a-dihydro-4H-pyrrolo[3,4-d]oxazole-4,6(5H)-dione (4aq)**

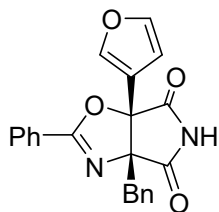

White solid, **M.p.** 76 – 77 °C; 16.9 mg, 45% yield, >95:5 dr, 87% ee.  $[\alpha]_{436}^{25} = -25.4$  ( $c = 0.98$ , in  $\text{CH}_2\text{Cl}_2$ ).

Dissolved in MeOH for UPC<sup>2</sup>; UPC<sup>2</sup> (Daicel CHIRALPAK **OD-3**,  $\text{CO}_2/\text{MeOH} = 90/10$ , flow rate = 1.5 mL/min,  $\lambda = 254$  nm) retention time: 6.7 min, 8.3 min. dr > 95:5 determined by <sup>1</sup>H NMR.

<sup>1</sup>H NMR (400 MHz, Chloroform-*d*)  $\delta = 9.20$  (s, 1H), 8.04 – 8.02 (m, 2H), 7.56 – 7.52 (m, 1H), 7.50 – 7.49 (m, 1H), 7.46 – 7.42 (m, 2H), 7.18 (m, 1H), 7.11 – 7.03 (m, 3H), 6.81 – 6.80 (m, 2H), 6.30 – 6.29 (m, 1H), 3.34 (d,  $J = 14.6$  Hz, 1H), 3.28 (d,  $J = 14.6$  Hz, 1H) ppm.

<sup>13</sup>C{<sup>1</sup>H} NMR (100 MHz, Chloroform-*d*)  $\delta = 175.0, 172.7, 164.0, 144.0, 142.0, 133.7, 132.8, 130.1, 129.0, 128.7, 127.8, 126.9, 125.5, 117.0, 108.7, 87.1, 82.4, 37.2$  ppm.

**IR** (neat):  $\nu(\text{cm}^{-1})$  3152, 3064, 2761, 1793, 1729, 1641, 1602, 1580, 1497, 1452, 1432, 1330, 1295, 1265, 1219, 1163, 1092, 1065, 1029, 968, 893, 875, 799, 784, 735, 696, 640, 600, 502, 474, 434.

**HRMS** (ESI-FT) calcd for  $\text{C}_{22}\text{H}_{17}\text{N}_2\text{O}_4^+$  ( $[\text{M}] + \text{H}^+$ ) = 373.1183, found 373.1189.

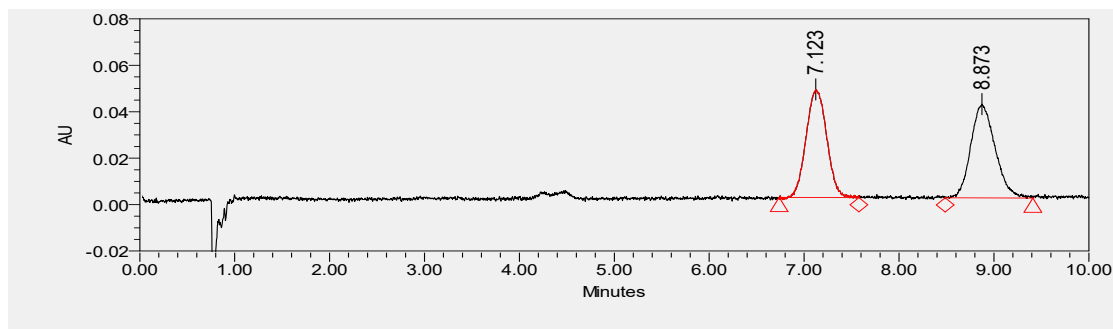

|   | Retention Time | % Area |
|---|----------------|--------|
| 1 | 7.123          | 49.41  |
| 2 | 8.873          | 50.59  |

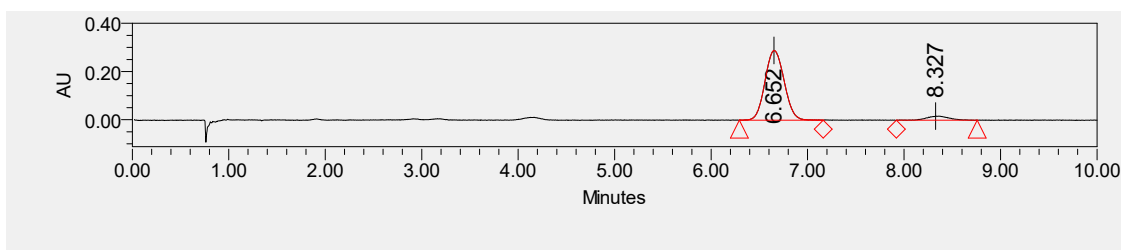

|   | Retention Time | % Area |
|---|----------------|--------|
| 1 | 6.652          | 93.72  |
| 2 | 8.327          | 6.28   |

**3a-Benzyl-2-phenyl-6a-(thiophen-2-yl)-3a,6a-dihydro-4H-pyrrolo[3,4-d]oxazole-4,6(5H)-dione (4ar)**

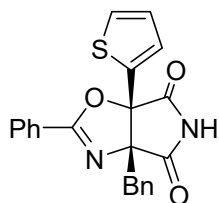

Yellow solid, **M.p.** 189 – 190 °C; 23.7 mg, 61% yield, >95:5 dr, 88% ee.  $[\alpha]_{436}^{25} = -25.7$  ( $c = 0.41$ , in  $\text{CH}_2\text{Cl}_2$ ).

Dissolved in MeOH for UPC<sup>2</sup>; UPC<sup>2</sup> (Daicel CHIRALPAK **OJ-3**,  $\text{CO}_2/\text{MeOH} = 90/10$ , flow rate = 1.5 mL/min,  $\lambda = 254$  nm) retention time: 9.8 min, 10.6 min. dr > 95:5 determined by <sup>1</sup>H NMR.

<sup>1</sup>H NMR (400 MHz, Chloroform-*d*)  $\delta = 9.11$  (s, 1H), 8.06 – 8.04 (m, 2H), 7.58 – 7.54 (m, 1H), 7.47 – 7.43 (m, 2H), 7.39 – 7.37 (m, 1H), 7.08 – 6.97 (m, 4H), 6.84 – 6.83 (m, 1H), 6.67 – 6.66 (m, 2H), 3.39 (d,  $J = 14.6$  Hz, 1H), 3.29 (d,  $J = 14.6$  Hz, 1H) ppm.

<sup>13</sup>C{<sup>1</sup>H} NMR (100 MHz, Chloroform-*d*)  $\delta = 174.6$  172.4, 163.7, 134.3, 133.8, 132.9, 130.1, 129.2, 128.8, 127.9, 127.5, 127.3, 127.2, 126.7, 125.5, 89.4, 83.7, 37.2 ppm.

**IR** (neat):  $\nu(\text{cm}^{-1})$  3211, 3065, 2762, 1794, 1733, 1643, 1603, 1580, 1495, 1452, 1432, 1328, 1245, 1197, 1091, 1066, 1028, 968, 913, 850, 782, 736, 696, 640, 499, 428.

**HRMS** (ESI-FT) calcd for  $\text{C}_{22}\text{H}_{16}\text{N}_2\text{O}_3\text{SNa}^+$  ( $[\text{M}] + \text{Na}^+$ ) = 411.0774, found 411.0762.

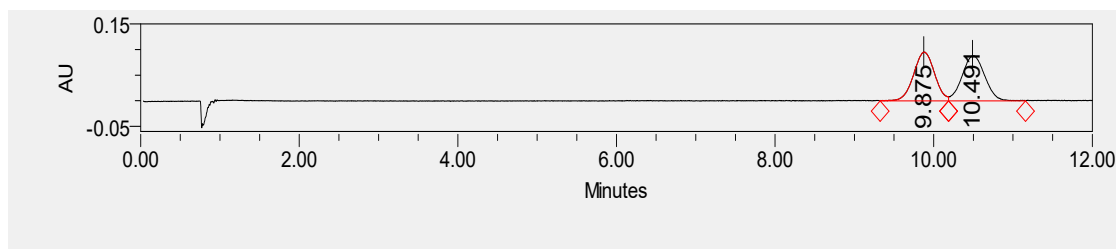

|   | Retention Time | % Area |
|---|----------------|--------|
| 1 | 9.875          | 50.04  |
| 2 | 10.491         | 49.96  |

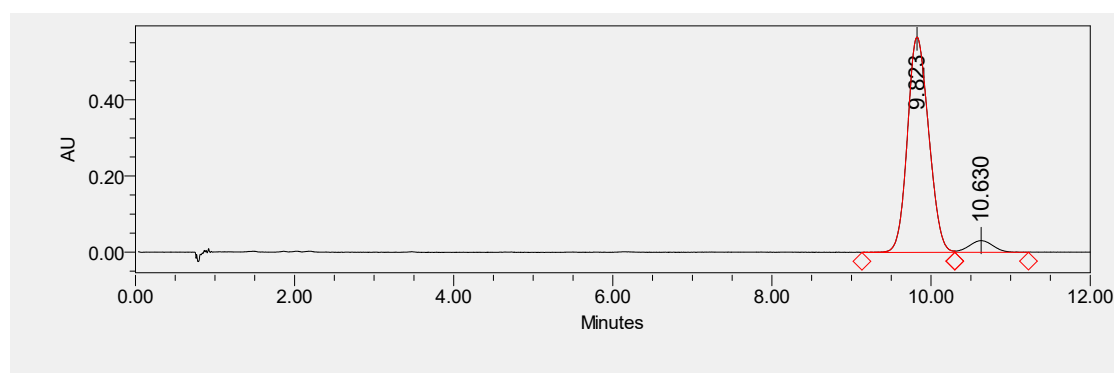

|   | Retention Time | % Area |
|---|----------------|--------|
| 1 | 9.823          | 94.20  |
| 2 | 10.630         | 5.80   |

**3a-Benzyl-2-phenyl-6a-((E)-prop-1-en-1-yl)-3a,6a-dihydro-4H-pyrrolo[3,4-d]oxazole-4,6(5H)-dione (4as)**

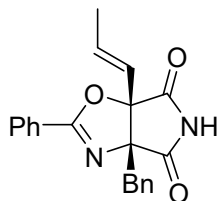

White solid, **M.p.** 100 – 101 °C; 12.2 mg, 35% yield, >95:5 dr, 81% ee.  $[\alpha]_D^{25} = -36.9$  ( $c = 0.16$ , in  $\text{CH}_2\text{Cl}_2$ ).

Dissolved in MeOH for UPC<sup>2</sup>; UPC<sup>2</sup> (Daicel CHIRALPAK **OD-3**,  $\text{CO}_2/\text{MeOH} = 90/10$ , flow rate = 1.5 mL/min,  $\lambda = 254$  nm) retention time: 5.3 min, 6.1 min. dr > 95:5 determined by <sup>1</sup>H NMR.

<sup>1</sup>H NMR (400 MHz, Chloroform-*d*)  $\delta = 8.83$  (s, 1H), 8.00 – 7.99 (m, 2H), 7.54 – 7.51 (m, 1H), 7.44 – 7.40 (m, 2H), 7.26 – 7.17 (m, 5H), 5.97 – 5.88 (m, 1H), 5.36 (dd,  $J = 16.0, 1.2$  Hz, 1H), 3.43 (d,  $J = 14.8$  Hz, 1H), 3.31 (d,  $J = 14.8$  Hz, 1H), 1.78 – 1.76 (m, 3H) ppm.

<sup>13</sup>C{<sup>1</sup>H} NMR (100 MHz, Chloroform-*d*)  $\delta = 175.1, 173.3, 164.0, 134.6, 132.7, 132.4, 131.1, 129.0, 128.7, 128.1, 127.1, 125.9, 121.6, 89.8, 83.0, 37.4, 18.3$  ppm.

**IR** (neat):  $\nu(\text{cm}^{-1})$  3212, 3063, 2922, 2854, 2761, 1792, 1730, 1672, 1640, 1602, 1580, 1496, 1451, 1332, 1296, 1224, 1159, 1090, 1068, 1028, 965, 934, 781, 735, 696, 625, 501, 432.

**HRMS** (ESI-FT) calcd for  $\text{C}_{21}\text{H}_{18}\text{N}_2\text{O}_3\text{Na}^+$  ( $[\text{M}] + \text{Na}^+$ ) = 369.1210, found 369.1212.

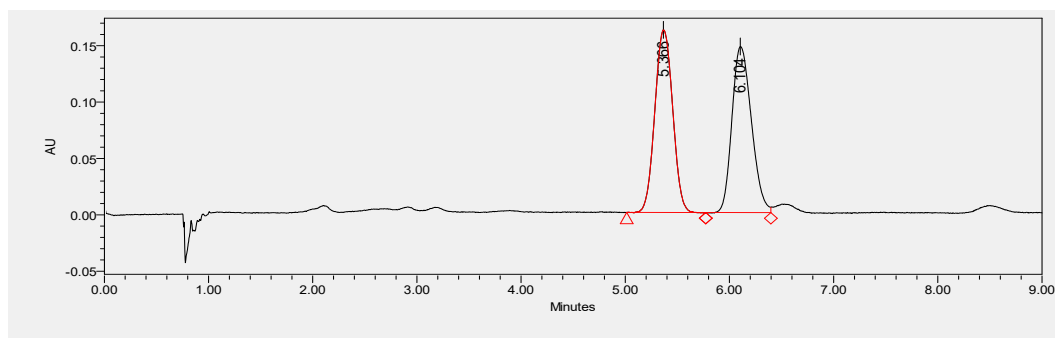

|   | Retention Time | % Area |
|---|----------------|--------|
| 1 | 5.366          | 50.17  |
| 2 | 6.104          | 49.83  |

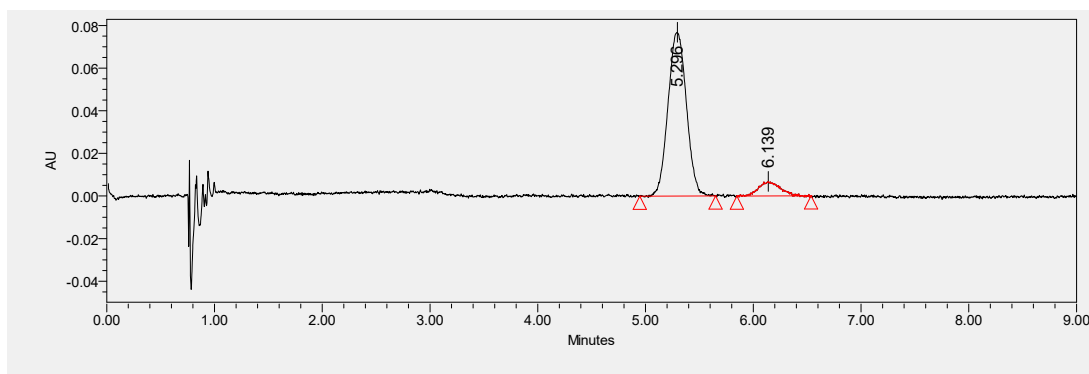

|   | Retention Time | % Area |
|---|----------------|--------|
| 1 | 5.296          | 90.58  |
| 2 | 6.139          | 9.42   |

**3a-Benzyl-2-phenyl-6a-((E)-styryl)-3a,6a-dihydro-4H-pyrrolo[3,4-d]oxazole-4,6(5H)-dione (4at)**

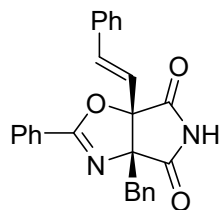

White solid, **M.p.** 83 – 84 °C; 17.3 mg, 42% yield, >95:5 dr, 67% ee.  $[\alpha]_D^{25} = +45.0$  ( $c = 0.26$ , in  $\text{CH}_2\text{Cl}_2$ ).

Dissolved in MeOH for UPC<sup>2</sup>; UPC<sup>2</sup> (Daicel CHIRALPAK OJ-3,  $\text{CO}_2/\text{MeOH} = 90/10$ , flow rate = 1.5 mL/min,  $\lambda = 254$  nm) retention time: 4.1 min, 7.1 min. dr > 95:5 determined by <sup>1</sup>H NMR.

<sup>1</sup>H NMR (400 MHz, Chloroform-*d*)  $\delta = 8.70$  (s, 1H), 8.07 – 8.06 (m, 2H), 7.58 – 7.55 (m, 1H), 7.48 – 7.44 (m, 2H), 7.39 – 7.30 (m, 5H), 7.21 – 7.12 (m, 5H), 6.77 (d,  $J = 16.2$  Hz, 1H), 5.93 (d,  $J = 16.2$  Hz, 1H), 3.44 (d,  $J = 14.8$  Hz, 1H), 3.40 (d,  $J = 14.8$  Hz, 1H) ppm.

<sup>13</sup>C{<sup>1</sup>H} NMR (100 MHz, Chloroform-*d*)  $\delta = 174.8, 172.8, 164.1, 134.9, 134.5, 134.4, 132.9, 131.1, 129.1, 129.0, 128.9, 128.8, 128.3, 127.3, 127.2, 125.8, 119.2, 90.2, 84.1, 37.5$  ppm.

**IR** (neat):  $\nu(\text{cm}^{-1})$  3216, 3062, 3030, 2925, 2761, 1792, 1733, 1640, 1602, 1580, 1496, 1451, 1330, 1216, 1155, 1091, 1067, 1029, 965, 782, 738, 695, 645, 567, 546, 492.

**HRMS** (ESI-FT) calcd for  $\text{C}_{26}\text{H}_{20}\text{N}_2\text{O}_3\text{K}^+$  ( $[\text{M}] + \text{K}^+$ ) = 447.1106, found 447.1106.

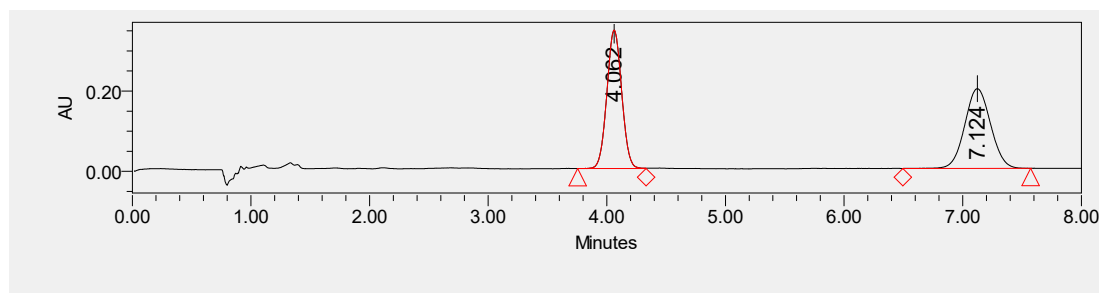

|   | Retention Time | % Area |
|---|----------------|--------|
| 1 | 4.062          | 49.77  |
| 2 | 7.124          | 50.23  |

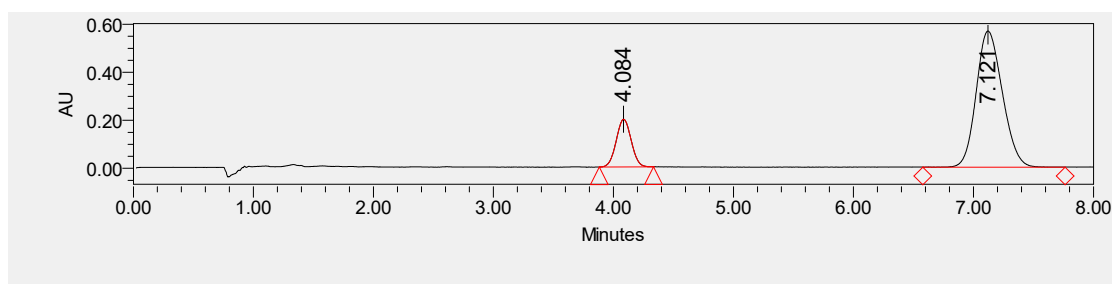

|   | Retention Time | % Area |
|---|----------------|--------|
| 1 | 4.084          | 16.64  |
| 2 | 7.121          | 83.36  |

**3a-Benzyl-6a-phenyl-2-(*p*-tolyl)-3a,6a-dihydro-4*H*-pyrrolo[3,4-*d*]oxazole-4,6(5*H*)-dione (4ba)**

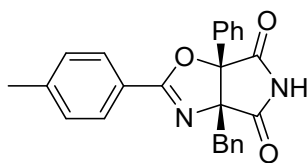

White solid, **M.p.** 86 – 87 °C; 35.9 mg, 91% yield, >95:5 dr, 89% ee.  $[\alpha]^{25}_D = +12.4$  ( $c = 0.71$ , in  $\text{CH}_2\text{Cl}_2$ ).

Dissolved in MeOH for UPC<sup>2</sup>; UPC<sup>2</sup> (Daicel CHIRALPAK **OJ-3**,  $\text{CO}_2/\text{MeOH} = 90/10$ , flow rate = 1.5 mL/min,  $\lambda = 254$  nm) retention time: 5.5 min, 7.3 min. dr > 95:5 determined by <sup>1</sup>H NMR.

**<sup>1</sup>H NMR** (400 MHz, Chloroform-*d*)  $\delta = 9.40$  (s, 1H), 7.98 – 7.96 (m, 2H), 7.40 – 7.37 (m, 1H), 7.33 – 7.25 (m, 4H), 7.10 – 7.09 (m, 2H), 7.01 – 6.97 (m, 1H), 6.90 – 6.86 (m, 2H), 6.49 – 6.47 (m, 2H), 3.44 (d,  $J = 14.6$  Hz, 1H), 2.96 (d,  $J = 14.6$  Hz, 1H), 2.42 (s, 3H) ppm.

**<sup>13</sup>C{<sup>1</sup>H} NMR** (100 MHz, Chloroform-*d*)  $\delta = 175.6, 174.3, 164.2, 143.6, 133.6, 132.0, 130.5, 129.5, 129.3, 129.1, 128.7, 127.5, 126.4, 126.2, 122.9, 91.3, 83.1, 36.6, 21.8$  ppm.

**IR** (neat):  $\nu(\text{cm}^{-1})$  3195, 3063, 3033, 2924, 2760, 1792, 1730, 1640, 1573, 1498, 1452, 1430, 1411, 1328, 1264, 1215, 1182, 1160, 1092, 1049, 1019, 975, 917, 829, 762, 729, 699, 644, 476.

**HRMS** (ESI-FT) calcd for  $\text{C}_{25}\text{H}_{21}\text{N}_2\text{O}_3^+$  ( $[\text{M}]+\text{H}^+$ ) = 397.1547, found 397.1550.

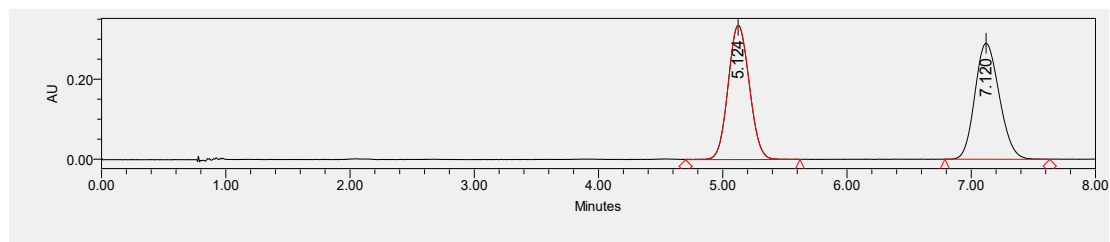

|   | Retention Time | % Area |
|---|----------------|--------|
| 1 | 5.124          | 50.07  |
| 2 | 7.120          | 49.93  |

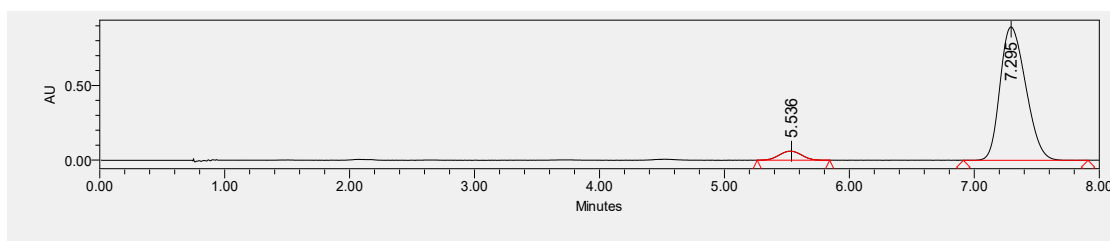

|   | Retention Time | % Area |
|---|----------------|--------|
| 1 | 5.536          | 5.60   |
| 2 | 7.295          | 94.40  |

**3a-Benzyl-2-(4-(*tert*-butyl)phenyl)-6a-phenyl-3a,6a-dihydro-4*H*-pyrrolo[3,4-*d*]oxazole-4,6(5*H*)-dione (4ca)**

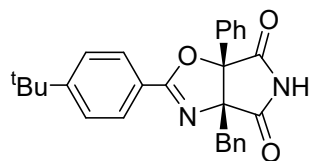

White solid, **M.p.** 113 – 114 °C; 41.8 mg, 95% yield, >95:5 dr, 91% ee.  $[\alpha]_D^{25} = +10.3$  ( $c = 0.80$ , in  $\text{CH}_2\text{Cl}_2$ ).

Dissolved in MeOH for UPC<sup>2</sup>; UPC<sup>2</sup> (Daicel CHIRALPAK OJ-3,  $\text{CO}_2/\text{MeOH} = 80/20$ , flow rate = 1.5 mL/min,  $\lambda = 254$  nm) retention time: 2.6 min, 7.2 min. dr > 95:5 determined by <sup>1</sup>H NMR.

<sup>1</sup>H NMR (400 MHz, Chloroform-*d*)  $\delta = 9.42$  (s, 1H), 8.04 – 8.02 (m, 2H), 7.50 – 7.47 (m, 2H), 7.40 – 7.37 (m, 1H), 7.32 – 7.29 (m, 2H), 7.11 – 7.09 (m, 2H), 7.01 – 6.98 (m, 1H), 6.91 – 6.87 (m, 2H), 6.50 – 6.49 (m, 2H), 3.45 (d,  $J = 14.8$  Hz, 1H), 2.96 (d,  $J = 14.8$  Hz, 1H), 1.35 (s, 9H) ppm.

<sup>13</sup>C{<sup>1</sup>H} NMR (100 MHz, Chloroform-*d*)  $\delta = 175.6, 174.3, 164.2, 156.6, 133.7, 132.0, 130.5, 129.3, 129.0, 128.7, 127.6, 126.4, 126.3, 125.8, 122.9, 91.2, 83.1, 36.7, 35.3, 31.2$  ppm.

**IR** (neat):  $\nu(\text{cm}^{-1})$  3201, 3063, 3033, 2963, 2870, 2760, 1793, 1732, 1641, 1568, 1499, 1453, 1411, 1364, 1329, 1267, 1215, 1160, 1114, 1089, 1050, 1018, 975, 918, 847, 755, 735, 698, 646, 552, 494.

**HRMS** (ESI-FT) calcd for  $\text{C}_{28}\text{H}_{27}\text{N}_2\text{O}_3^+$  ( $[\text{M}] + \text{H}^+$ ) = 439.2016, found 439.2015.

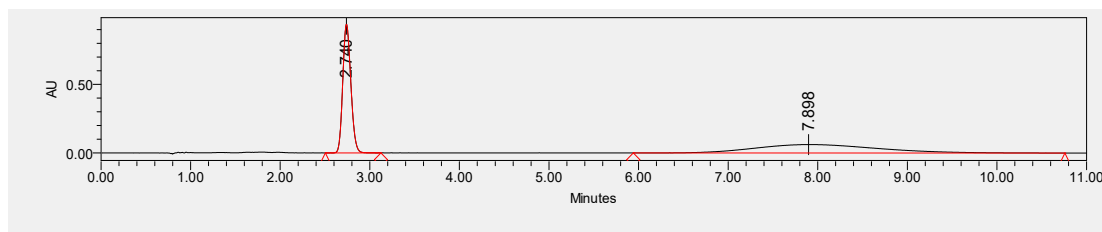

|   | Retention Time | % Area |
|---|----------------|--------|
| 1 | 2.740          | 50.10  |
| 2 | 7.898          | 49.90  |

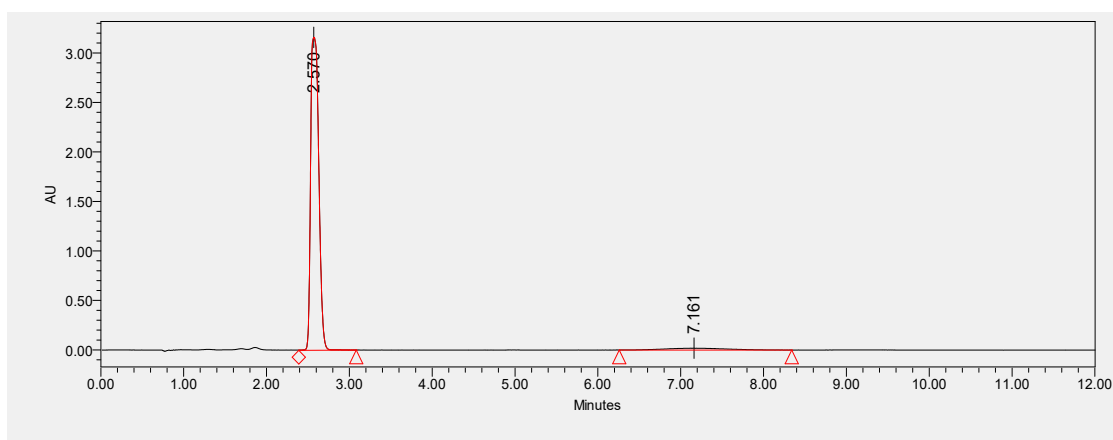

|   | Retention Time | % Area |
|---|----------------|--------|
| 1 | 2.570          | 95.67  |
| 2 | 7.161          | 4.33   |





**3a-Benzyl-2-(4-fluorophenyl)-6a-phenyl-3a,6a-dihydro-4H-pyrrolo[3,4-d]oxazole-4,6(5H)-dione (4da)**

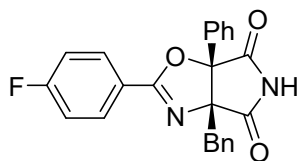

White solid, **M.p.** 93 – 94 °C; 32.4 mg, 81% yield, >95:5 dr, 92% ee.  $[\alpha]_D^{25} = +19.3$  ( $c = 0.70$ , in  $\text{CH}_2\text{Cl}_2$ ).

Dissolved in MeOH for UPC<sup>2</sup>; UPC<sup>2</sup> (Daicel CHIRALPAK **OJ-3**,  $\text{CO}_2/\text{MeOH} = 90/10$ , flow rate = 1.5 mL/min,  $\lambda = 254$  nm) retention time: 5.7 min, 6.3 min. dr > 95:5 determined by <sup>1</sup>H NMR.

<sup>1</sup>H NMR (400 MHz, Chloroform-*d*)  $\delta = 9.36$  (s, 1H), 8.10 – 8.07 (m, 2H), 7.42 – 7.38 (m, 1H), 7.34 – 7.30 (m, 2H), 7.16 – 7.08 (m, 4H), 7.02 – 6.98 (m, 1H), 6.91 – 6.87 (m, 2H), 6.47 – 6.46 (m, 2H), 3.43 (d,  $J = 14.6$  Hz, 1H), 2.96 (d,  $J = 14.6$  Hz, 1H) ppm.

<sup>13</sup>C{<sup>1</sup>H} NMR (100 MHz, Chloroform-*d*)  $\delta = 175.4$ , 174.1, 165.6 (d,  $J = 253.6$  Hz), 163.2, 133.4, 131.7, 131.5 (d,  $J = 9.1$  Hz), 130.4, 129.4, 128.8, 127.6, 126.6, 126.2, 121.9 (d,  $J = 3.1$  Hz), 116.1 (d,  $J = 22.0$  Hz), 91.5, 83.1, 36.6 ppm.

<sup>19</sup>F{<sup>1</sup>H} NMR (376 MHz, Chloroform-*d*)  $\delta = -105.27$  ppm.

**IR** (neat):  $\nu(\text{cm}^{-1})$  3195, 3065, 2762, 1793, 1733, 1644, 1604, 1509, 1452, 1414, 1328, 1297, 1234, 1157, 1090, 1049, 1016, 974, 848, 814, 762, 699, 643, 597, 487.

**HRMS** (ESI-FT) calcd for  $\text{C}_{24}\text{H}_{18}\text{FN}_2\text{O}_3^+$  ( $[\text{M}+\text{H}^+]$ ) = 401.1296, found 401.1299.

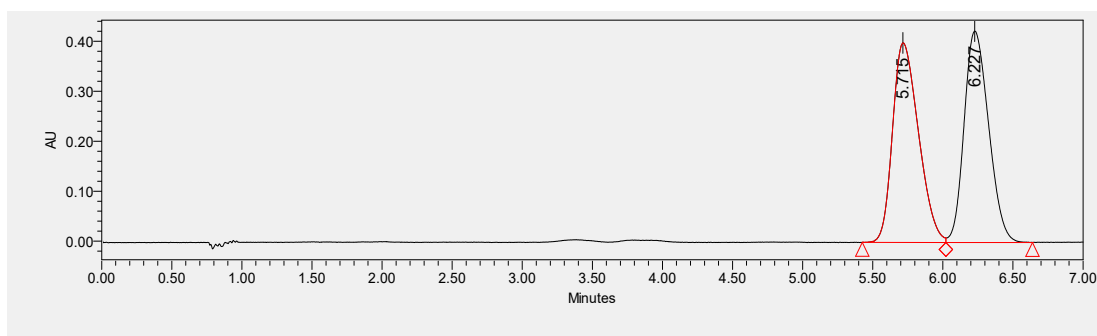

|   | Retention Time | % Area |
|---|----------------|--------|
| 1 | 5.715          | 49.94  |
| 2 | 6.227          | 50.06  |

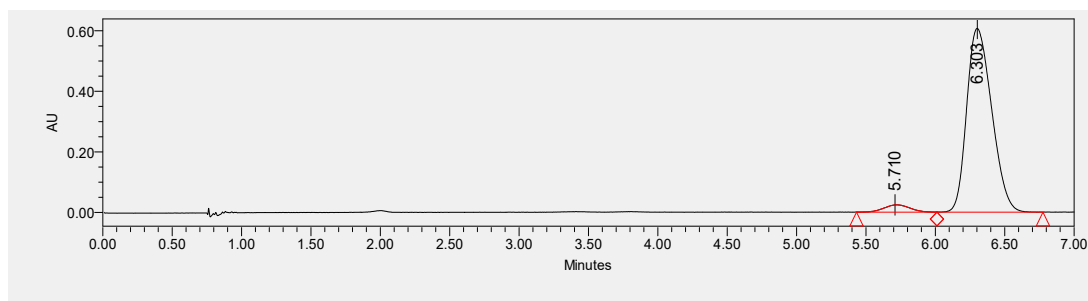

|   | Retention Time | % Area |
|---|----------------|--------|
| 1 | 5.710          | 3.95   |
| 2 | 6.303          | 96.05  |



**3a-Benzyl-2-(4-chlorophenyl)-6a-phenyl-3a,6a-dihydro-4H-pyrrolo[3,4-d]oxazole-4,6(5H)-dione (4ea)**

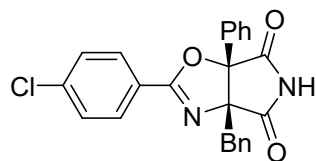

White solid, **M.p.** 98 – 99 °C; 41.3 mg, 98% yield, >95:5 dr, 91% ee.  $[\alpha]_D^{25} = +6.7$  ( $c = 0.68$ , in  $\text{CH}_2\text{Cl}_2$ ).

Dissolved in MeOH for UPC<sup>2</sup>; **UPC<sup>2</sup>** (Daicel CHIRALPAK **IB-3**,  $\text{CO}_2/\text{MeOH} = 90/10$ , flow rate = 1.5 mL/min,  $\lambda = 254$  nm) retention time: 8.5 min, 9.6 min. dr > 95:5 determined by <sup>1</sup>H NMR.

**<sup>1</sup>H NMR** (400 MHz, Chloroform-*d*)  $\delta = 9.37$  (s, 1H), 8.03 – 7.99 (m, 2H), 7.45 – 7.43 (m, 2H), 7.42 – 7.40 (m, 1H), 7.34 – 7.31 (m, 2H), 7.09 – 7.07 (m, 2H), 7.02 – 6.98 (m, 1H), 6.91 – 6.87 (m, 2H), 6.46 – 6.45 (m, 2H), 3.44 (d,  $J = 14.8$  Hz, 1H), 2.96 (d,  $J = 14.8$  Hz, 1H) ppm.

**<sup>13</sup>C{<sup>1</sup>H} NMR** (100 MHz, Chloroform-*d*)  $\delta = 175.3, 174.0, 163.2, 139.3, 133.4, 131.7, 130.4, 130.3, 129.5, 129.2, 128.8, 127.6, 126.6, 126.2, 124.2, 91.6, 83.2, 36.6$  ppm.

**IR** (neat):  $\nu(\text{cm}^{-1})$  3207, 3064, 3033, 2765, 1793, 1734, 1644, 1597, 1492, 1452, 1430, 1404, 1327, 1264, 1216, 1093, 1049, 1015, 974, 917, 841, 756, 731, 699, 678, 642, 589, 510, 475, 451.

**HRMS** (ESI-FT) calcd for  $\text{C}_{24}\text{H}_{18}^{34.9659}\text{ClN}_2\text{O}_3^+$  ( $[\text{M}]+\text{H}^+$ ) = 417.1000, found 417.1004,  $\text{C}_{24}\text{H}_{18}^{36.9659}\text{ClN}_2\text{O}_3^+$  ( $[\text{M}]+\text{H}^+$ ) = 419.0971, found 419.0970.

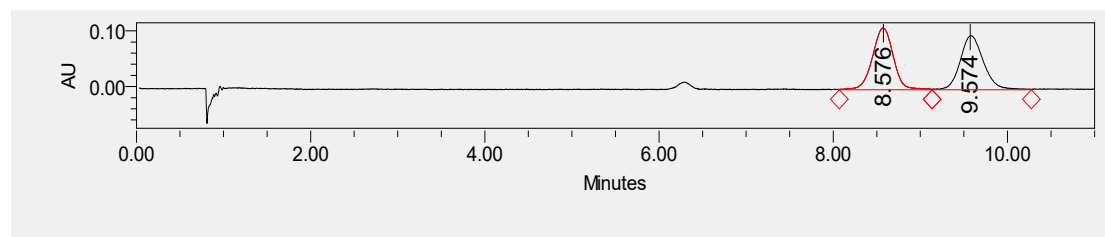

|   | Retention Time | % Area |
|---|----------------|--------|
| 1 | 8.576          | 50.82  |
| 2 | 9.574          | 49.18  |

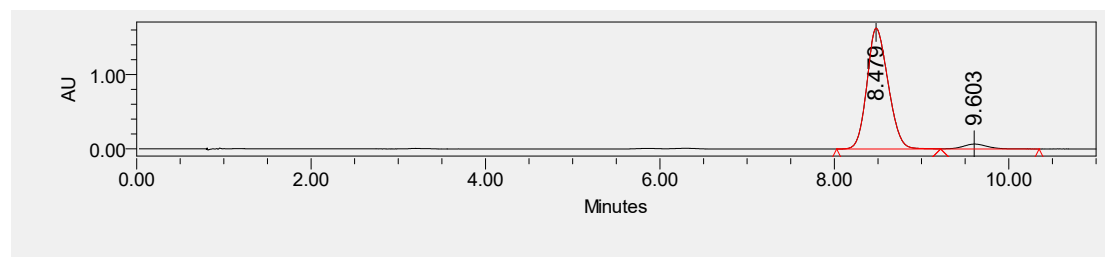

|   | Retention Time | % Area |
|---|----------------|--------|
| 1 | 8.479          | 95.56  |
| 2 | 9.603          | 4.44   |

**3a-Benzyl-2-(2-bromophenyl)-6a-phenyl-3a,6a-dihydro-4H-pyrrolo[3,4-d]oxazole-4,6(5H)-dione (4fa)**

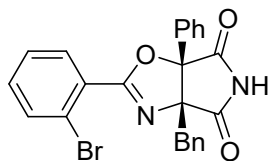

White solid, **M.p.** 104 – 106 °C; 45.1 mg, 98% yield, >95:5 dr, 90% ee.  $[\alpha]_D^{25} = +74.3$  ( $c = 0.60$ , in  $\text{CH}_2\text{Cl}_2$ ).

Dissolved in MeOH for UPC<sup>2</sup>; UPC<sup>2</sup> (Daicel CHIRALPAK **OJ-3**,  $\text{CO}_2/\text{MeOH} = 80/20$ , flow rate = 1.5 mL/min,  $\lambda = 254$  nm) retention time: 2.8 min, 3.7 min. dr > 95:5 determined by <sup>1</sup>H NMR.

<sup>1</sup>H NMR (400 MHz, Chloroform-*d*)  $\delta = 9.30$  (s, 1H), 7.71 – 7.65 (m, 2H), 7.44 – 7.34 (m, 5H), 7.19 – 7.17 (m, 2H), 7.08 – 7.04 (m, 1H), 6.98 – 6.94 (m, 2H), 6.52 – 6.50 (m, 2H), 3.52 (d,  $J = 14.4$  Hz, 1H), 2.99 (d,  $J = 14.4$  Hz, 1H) ppm.

<sup>13</sup>C{<sup>1</sup>H} NMR (100 MHz, Chloroform-*d*)  $\delta = 175.0, 173.6, 163.9, 134.2, 133.3, 132.9, 132.0, 131.7, 130.8, 129.5, 128.9, 127.6, 127.4, 126.7, 126.3, 122.3, 91.7, 83.0, 36.1$  ppm.

**IR** (neat):  $\nu(\text{cm}^{-1})$  3201, 3063, 2760, 1794, 1729, 1642, 1588, 1497, 1473, 1451, 1432, 1326, 1262, 1214, 1160, 1106, 1031, 972, 918, 732, 700, 676, 639, 491.

**HRMS** (ESI-FT) calcd for  $\text{C}_{24}\text{H}_{18}^{78,9183}\text{BrN}_2\text{O}_3^+$  ( $[\text{M}]+\text{H}^+$ ) = 461.0495, found 461.0490,  $\text{C}_{24}\text{H}_{18}^{80,9163}\text{BrN}_2\text{O}_3^+$  ( $[\text{M}]+\text{H}^+$ ) = 463.0475, found 463.0472.

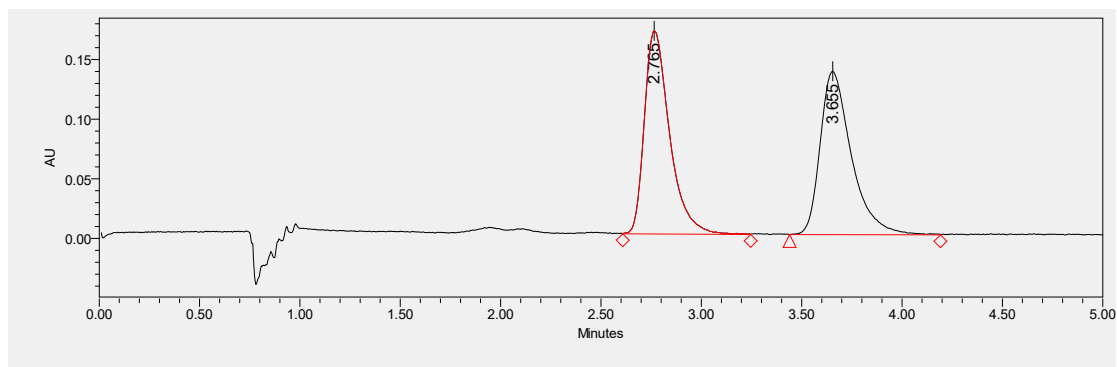

|   | Retention Time | % Area |
|---|----------------|--------|
| 1 | 2.765          | 50.13  |
| 2 | 3.655          | 49.87  |

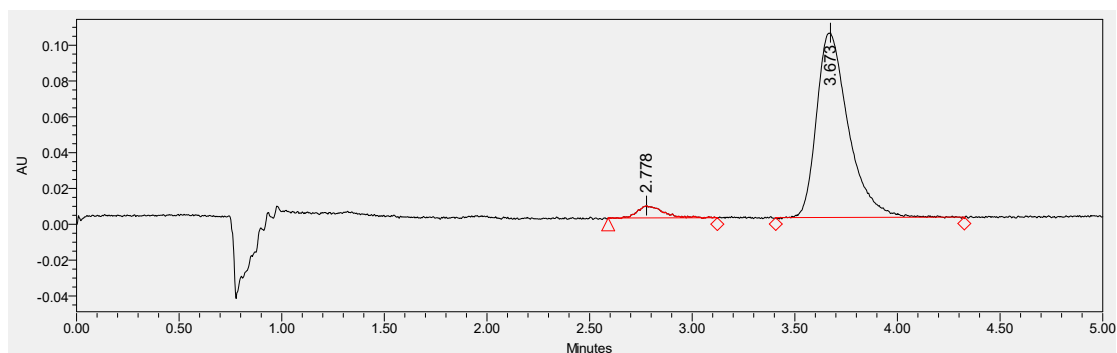

|   | Retention Time | % Area |
|---|----------------|--------|
| 1 | 2.778          | 5.10   |
| 2 | 3.673          | 94.90  |



**3a-Benzyl-6a-phenyl-2-(*m*-tolyl)-3a,6a-dihydro-4*H*-pyrrolo[3,4-*d*]oxazole-4,6(5*H*)-dione (4ga)**

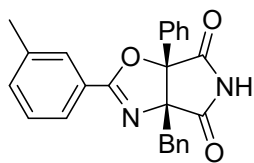

White solid, **M.p.** 86 – 87 °C; 33.1 mg, 84% yield, >95:5 dr, 88% ee.  $[\alpha]^{25}_D = +21.6$  ( $c = 0.56$ , in  $\text{CH}_2\text{Cl}_2$ ).

Dissolved in MeOH for UPC<sup>2</sup>; UPC<sup>2</sup> (Daicel CHIRALPAK **OJ-3**,  $\text{CO}_2/\text{MeOH} = 90/10$ , flow rate = 1.5 mL/min,  $\lambda = 254$  nm) retention time: 5.7 min, 8.9 min. dr > 95:5 determined by <sup>1</sup>H NMR.

**<sup>1</sup>H NMR** (400 MHz, Chloroform-*d*)  $\delta = 9.34$  (s, 1H), 7.91 – 7.88 (m, 2H), 7.41 – 7.35 (m, 3H), 7.33 – 7.29 (m, 2H), 7.11 – 7.09 (m, 2H), 7.02 – 6.98 (m, 1H), 6.91 – 6.87 (m, 2H), 6.50 – 6.48 (m, 2H), 3.43 (d,  $J = 14.6$  Hz, 1H), 2.98 (d,  $J = 14.6$  Hz, 1H), 2.41 (s, 3H) ppm.

**<sup>13</sup>C{<sup>1</sup>H} NMR** (100 MHz, Chloroform-*d*)  $\delta = 175.5, 174.2, 164.3, 138.7, 133.7, 133.6, 131.9, 130.4, 129.6, 129.3, 128.8, 128.7, 127.6, 126.5, 126.3, 125.6, 91.3, 83.2, 36.7, 21.4$  ppm.

**IR** (neat):  $\nu(\text{cm}^{-1})$  3206, 3063, 3032, 2924, 2760, 1793, 1733, 1642, 1603, 1586, 1496, 1452, 1431, 1328, 1265, 1202, 1098, 1049, 1019, 1049, 1019, 976, 925, 830, 800, 762, 738, 700, 641, 623, 573, 481, 425.

**HRMS** (ESI-FT) calcd for  $\text{C}_{25}\text{H}_{21}\text{N}_2\text{O}_3^+$  ( $[\text{M}] + \text{H}^+$ ) = 397.1547, found 397.1550.

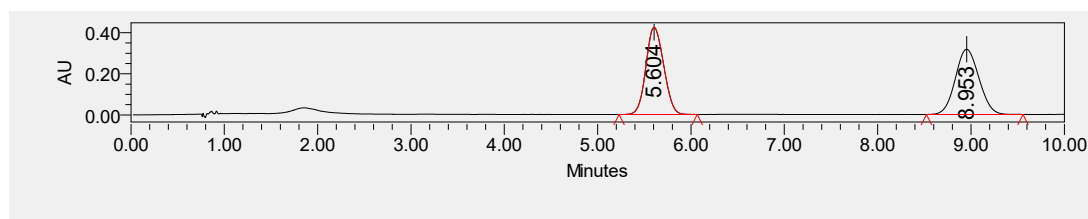

|   | Retention Time | % Area |
|---|----------------|--------|
| 1 | 5.604          | 50.09  |
| 2 | 8.953          | 49.91  |

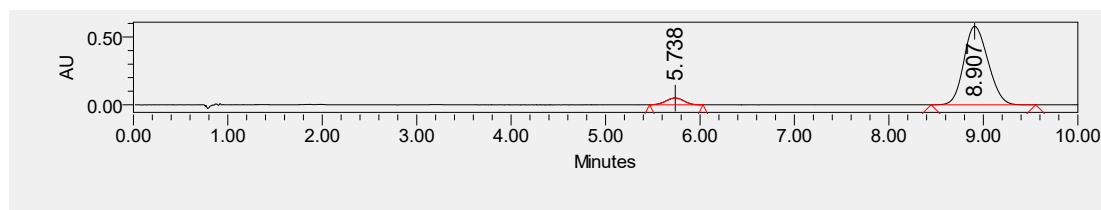

|   | Retention Time | % Area |
|---|----------------|--------|
| 1 | 5.738          | 6.00   |
| 2 | 8.907          | 94.00  |

**3a-Benzyl-2-(3,5-dimethylphenyl)-6a-phenyl-3a,6a-dihydro-4H-pyrrolo[3,4-d]oxazole-4,6(5H)-dione (4ha)**

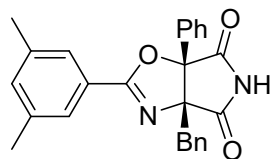

White solid, **M.p.** 95 – 96 °C; 36.6 mg, 89% yield, >95:5 dr, 77% ee.  $[\alpha]_D^{25} = +17.2$  ( $c = 0.65$ , in  $\text{CH}_2\text{Cl}_2$ ).

Dissolved in MeOH for UPC<sup>2</sup>; UPC<sup>2</sup> (Daicel CHIRALPAK **OJ-3**,  $\text{CO}_2/\text{MeOH} = 90/10$ , flow rate = 1.5 mL/min,  $\lambda = 254$  nm) retention time: 4.6 min, 8.0 min. dr > 95:5 determined by <sup>1</sup>H NMR.

<sup>1</sup>H NMR (400 MHz, Chloroform-*d*)  $\delta = 9.32$  (s, 1H), 7.72 – 7.71 (m, 2H), 7.41 – 7.37 (m, 1H), 7.33 – 7.29 (m, 2H), 7.19 (s, 1H), 7.10 – 7.09 (m, 2H), 7.02 – 6.98 (m, 1H), 6.91 – 6.87 (m, 2H), 6.50 – 6.48 (m, 2H), 3.42 (d,  $J = 14.8$  Hz, 1H), 2.99 (d,  $J = 14.8$  Hz, 1H), 2.36 (s, 6H) ppm.

<sup>13</sup>C{<sup>1</sup>H} NMR (100 MHz, Chloroform-*d*)  $\delta = 175.5, 174.2, 164.5, 138.5, 134.6, 133.6, 132.0, 130.4, 129.3, 128.7, 127.6, 126.8, 126.5, 126.3, 125.5, 91.2, 83.1, 36.7, 21.2$  ppm.

**IR** (neat):  $\nu(\text{cm}^{-1})$  3213, 3063, 3032, 2921, 2759, 1793, 1734, 1641, 1599, 1497, 1452, 1381, 1338, 1222, 1159, 1111, 1085, 1021, 975, 929, 863, 815, 761, 726, 700, 678, 642, 623, 574, 523, 478, 450.

**HRMS** (ESI-FT) calcd for  $\text{C}_{26}\text{H}_{23}\text{N}_2\text{O}_3^+$  ( $[\text{M}+\text{H}^+]$ ) = 411.1703, found 411.1702.

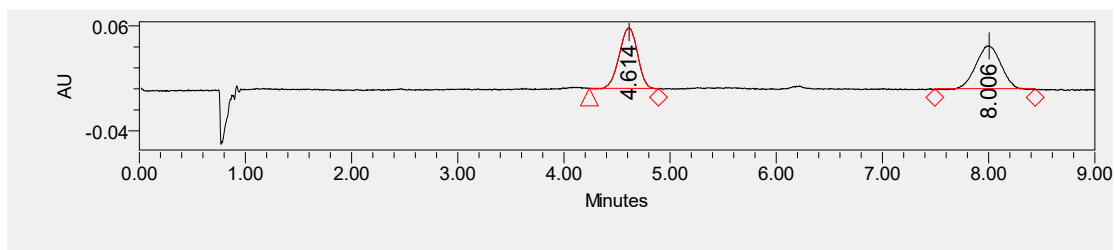

|   | Retention Time | % Area |
|---|----------------|--------|
| 1 | 4.614          | 50.53  |
| 2 | 8.006          | 49.47  |

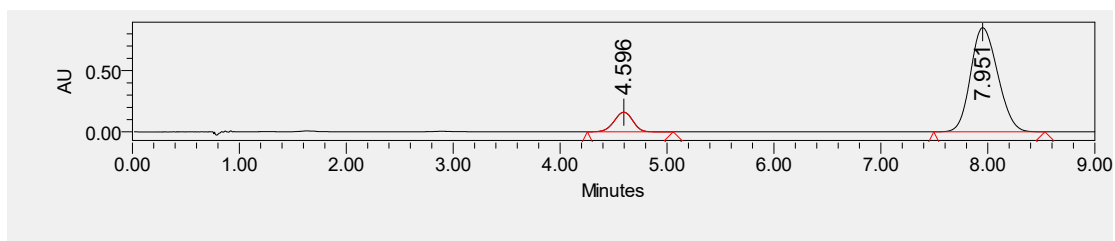

|   | Retention Time | % Area |
|---|----------------|--------|
| 1 | 4.596          | 11.42  |
| 2 | 7.951          | 88.58  |

**3a-Benzyl-2-(2-(diphenylphosphaneyl)phenyl)-6a-phenyl-3a,6a-dihydro-4H-pyrrolo[3,4-d]oxazole-4,6(5H)-dione (4ia)**

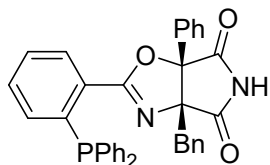

White solid, **M.p.** 112 – 113 °C; 39.2 mg, 69% yield, >95:5 dr, 94% ee.  $[\alpha]_D^{25} = +96.5$  ( $c = 0.45$ , in  $\text{CH}_2\text{Cl}_2$ ).

Dissolved in MeOH for UPC<sup>2</sup>; UPC<sup>2</sup> (Daicel CHIRALPAK IA-3,  $\text{CO}_2/\text{MeOH} = 80/20$ , flow rate = 1.5 mL/min,  $\lambda = 254$  nm) retention time: 8.3 min, 9.6 min. dr > 95:5 determined by <sup>1</sup>H NMR.

<sup>1</sup>H NMR (400 MHz, Chloroform-*d*)  $\delta = 11.13$  (s, 1H), 7.74 – 7.58 (m, 6H), 7.52 – 7.39 (m, 7H), 7.30 – 7.25 (m, 2H), 7.19 – 7.15 (m, 2H), 6.99 – 6.97 (m, 1H), 6.88 – 6.81 (m, 4H), 6.32 – 6.30 (m, 2H), 3.32 (d,  $J = 14.8$  Hz, 1H), 2.81 (d,  $J = 14.8$  Hz, 1H) ppm.

<sup>13</sup>C{<sup>1</sup>H} NMR (100 MHz, Chloroform-*d*)  $\delta = 175.1$ , 173.5, 163.5 (d,  $J = 3.2$  Hz), 134.3, 134.0 (d,  $J = 11.2$  Hz), 133.4, 133.0, 132.4 (d,  $J = 17.1$  Hz), 132.3 (d,  $J = 2.9$  Hz), 131.9 (d,  $J = 5.1$  Hz), 131.8, 131.2 (d,  $J = 8.7$  Hz), 130.7, 130.3 (d,  $J = 12.1$  Hz), 128.6 (d,  $J = 19.3$  Hz), 128.5 (d,  $J = 12.6$  Hz), 128.3, 128.3, 127.2, 126.4, 126.1, 91.6, 83.0, 36.3 ppm.

<sup>31</sup>P{<sup>1</sup>H} NMR (162 MHz, Chloroform-*d*)  $\delta = 32.26$  ppm.

**IR** (neat):  $\nu(\text{cm}^{-1})$  3059, 2924, 2751, 1791, 1736, 1664, 1588, 1496, 1437, 1376, 1323, 1260, 1218, 1174, 1116, 1064, 971, 803, 755, 723, 697, 624, 573, 545, 517, 493.

**HRMS** (ESI-FT) calcd for  $\text{C}_{36}\text{H}_{27}\text{N}_2\text{O}_3\text{PNa}^+$  ( $[\text{M}] + \text{Na}^+$ ) = 589.1652, found 589.1633.

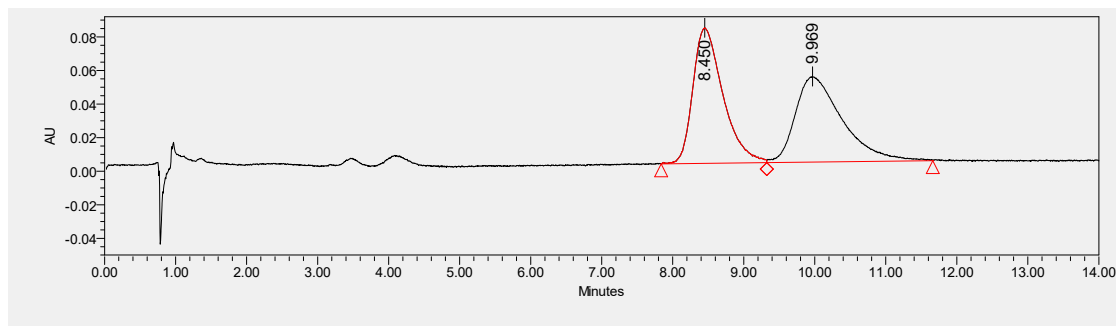

|   | Retention Time | % Area |
|---|----------------|--------|
| 1 | 8.450          | 50.37  |
| 2 | 9.969          | 49.63  |

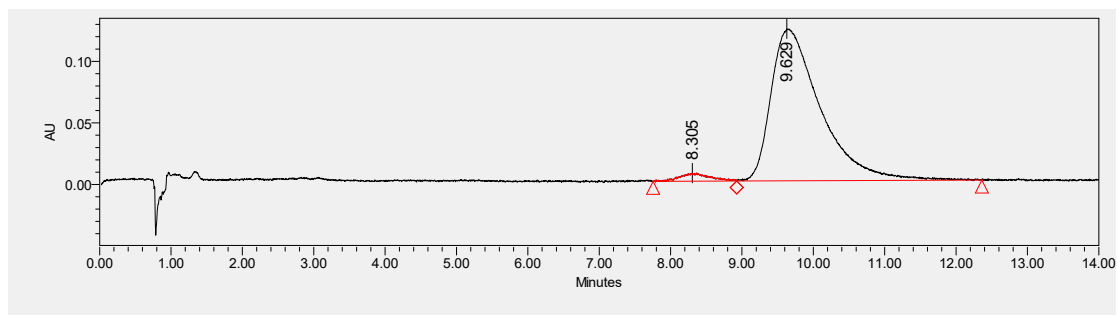

|   | Retention Time | % Area |
|---|----------------|--------|
| 1 | 8.305          | 3.09   |
| 2 | 9.629          | 96.91  |





**3a-Benzyl-2-(naphthalen-1-yl)-6a-phenyl-3a,6a-dihydro-4H-pyrrolo[3,4-d]oxazole-4,6(5H)-dione (4ja)**

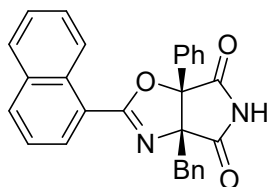

White solid, **M.p.** 96 – 98 °C; 36.7 mg, 85% yield, >95:5 dr, 91% ee.  $[\alpha]_D^{25} = +26.8$  ( $c = 0.75$ , in  $\text{CH}_2\text{Cl}_2$ ).

Dissolved in MeOH for UPC<sup>2</sup>; UPC<sup>2</sup> (Daicel CHIRALPAK **OJ-3**,  $\text{CO}_2/\text{MeOH} = 80/20$ , flow rate = 1.5 mL/min,  $\lambda = 254$  nm) retention time: 4.5 min, 11.0 min. dr > 95:5 determined by <sup>1</sup>H NMR.

<sup>1</sup>H NMR (400 MHz, Chloroform-*d*)  $\delta = 9.22$  (d,  $J = 8.6$  Hz, 1H), 8.26 – 8.24 (m, 1H), 8.04 – 8.02 (m, 1H), 7.91 – 7.89 (m, 1H), 7.67 – 7.63 (m, 1H), 7.58 – 7.55 (m, 1H), 7.52 – 7.48 (m, 1H), 7.44 – 7.40 (m, 1H), 7.37 – 7.33 (m, 2H), 7.19 – 7.18 (m, 2H), 7.03 – 6.99 (m, 1H), 6.92 – 6.89 (m, 2H), 6.57 – 6.55 (m, 2H), 3.52 (d,  $J = 14.6$  Hz, 1H), 3.08 (d,  $J = 14.6$  Hz, 1H) ppm.

<sup>13</sup>C{<sup>1</sup>H} NMR (100 MHz, Chloroform-*d*)  $\delta = 175.3, 174.1, 164.0, 133.9, 133.8, 133.7, 132.0, 131.2, 130.7, 130.6, 129.4, 128.9, 128.8, 128.3, 127.7, 126.6, 126.5, 126.3, 124.7, 122.0, 90.2, 84.0, 36.8$  ppm.

**IR** (neat):  $\nu(\text{cm}^{-1})$  3203, 3062, 2760, 1793, 1729, 1636, 1616, 1589, 1512, 1497, 1452, 1327, 1300, 1251, 1214, 1130, 1085, 1051, 1019, 968, 916, 809, 777, 642, 574, 528, 485.

**HRMS** (ESI-FT) calcd for  $\text{C}_{28}\text{H}_{21}\text{N}_2\text{O}_3^+$  ( $[\text{M}+\text{H}^+]$ ) = 433.1547, found 433.1548.

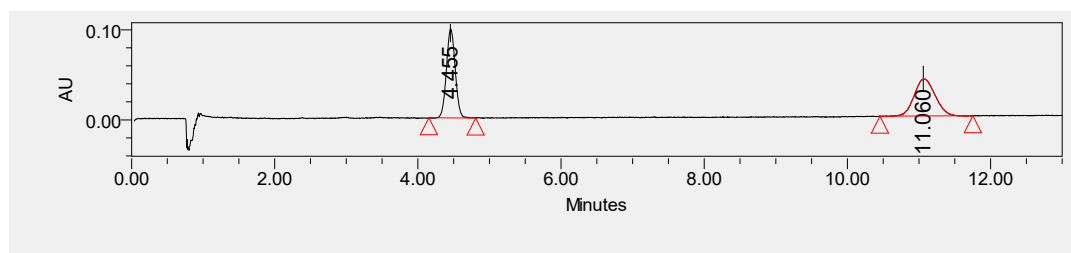

|   | Retention Time | % Area |
|---|----------------|--------|
| 1 | 4.455          | 50.13  |
| 2 | 11.060         | 49.87  |

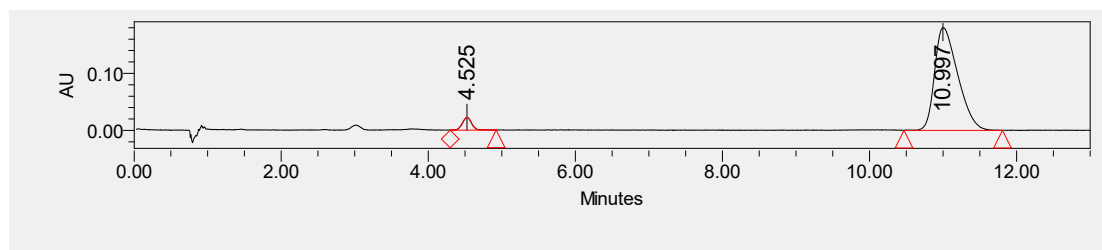

|   | Retention Time | % Area |
|---|----------------|--------|
| 1 | 4.525          | 4.75   |
| 2 | 10.997         | 95.25  |

**3a-Benzyl-2-(furan-2-yl)-6a-phenyl-3a,6a-dihydro-4H-pyrrolo[3,4-d]oxazole-4,6(5H)-dione (4ka)**

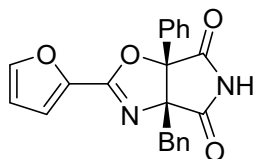

White solid, **M.p.** 112 – 113 °C; 27.7 mg, 74% yield, >95:5 dr, 92% ee.  $[\alpha]_D^{25} = +7.5$  ( $c = 0.21$ , in  $\text{CH}_2\text{Cl}_2$ ).

Dissolved in MeOH for UPC<sup>2</sup>; UPC<sup>2</sup> (Daicel CHIRALPAK **OJ-3**,  $\text{CO}_2/\text{MeOH} = 80/20$ , flow rate = 1.5 mL/min,  $\lambda = 254$  nm) retention time: 2.9 min, 4.4 min. dr > 95:5 determined by <sup>1</sup>H NMR.

<sup>1</sup>H NMR (400 MHz, Chloroform-*d*)  $\delta = 8.94$  (s, 1H), 7.78 – 7.77 (m, 1H), 7.59 – 7.58 (m, 1H), 7.42 – 7.39 (m, 1H), 7.34 – 7.30 (m, 2H), 7.14 – 7.08 (m, 3H), 7.03 – 6.99 (m, 1H), 6.92 – 6.88 (m, 2H), 6.48 – 6.46 (m, 2H), 3.42 (d,  $J = 14.6$  Hz, 1H), 2.97 (d,  $J = 14.6$  Hz, 1H) ppm.

<sup>13</sup>C{<sup>1</sup>H} NMR (100 MHz, Chloroform-*d*)  $\delta = 174.9, 173.6, 159.9, 133.4, 132.7, 132.3, 131.7, 130.5, 129.5, 128.8, 128.1, 127.9, 127.6, 126.5, 126.2, 91.6, 83.2, 36.6$  ppm.

**IR** (neat):  $\nu(\text{cm}^{-1})$  3206, 3091, 2758, 1793, 1734, 1639, 1518, 1498, 1451, 1427, 1370, 1326, 1216, 1159, 1088, 1066, 1032, 1006, 971, 855, 762, 723, 701, 650, 629, 578, 498, 452.

**HRMS** (ESI-FT) calcd for  $\text{C}_{22}\text{H}_{16}\text{N}_2\text{O}_4\text{K}^+$  ( $[\text{M}] + \text{K}^+$ ) = 411.0742, found 411.0746.

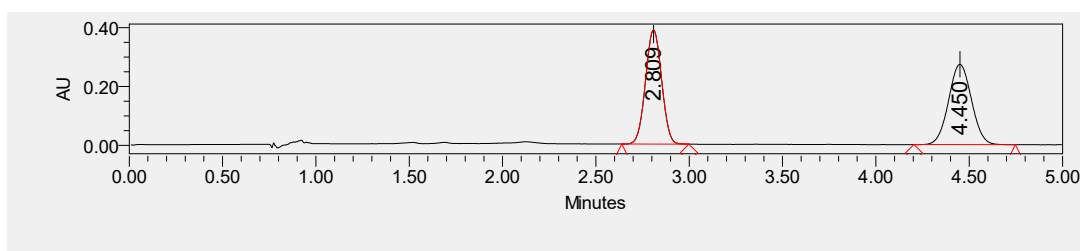

|   | Retention Time | % Area |
|---|----------------|--------|
| 1 | 2.809          | 50.04  |
| 2 | 4.450          | 49.96  |

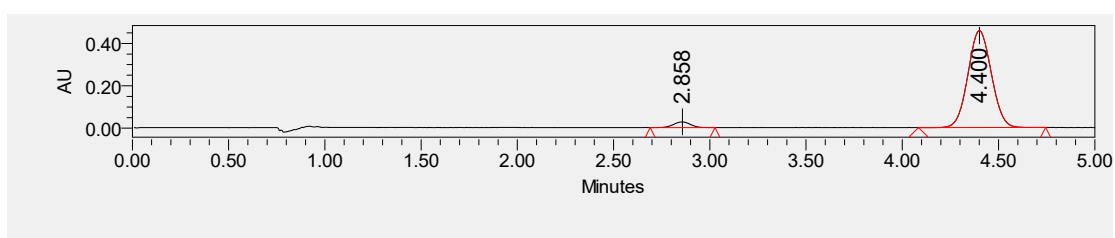

|   | Retention Time | % Area |
|---|----------------|--------|
| 1 | 2.858          | 4.08   |
| 2 | 4.400          | 95.92  |

**(3a*R*,6a*S*)-3a-Butyl-2,6a-diphenyl-3a,6a-dihydro-4*H*-pyrrolo[3,4-*d*]oxazole-4,6(5*H*)-dione (41a)**

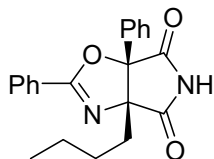

White solid, **M.p.** 174 – 176 °C; 25.0 mg, 72% yield, >95:5 dr, 88% ee.  $[\alpha]_D^{25} = +66.6$  ( $c = 0.50$ , in  $\text{CH}_2\text{Cl}_2$ ). Reference report:  $[\alpha]_D^{23} = +86.8$  ( $c = 0.191$ ,  $\text{CH}_2\text{Cl}_2$ , sample with ee = 94%), see *Angew. Chem., Int. Ed.*, **2013**, 52, 13223.

Dissolved in MeOH for UPC<sup>2</sup>; UPC<sup>2</sup> (Daicel CHIRALPAK **OJ-3**,  $\text{CO}_2/\text{MeOH} = 90/10$ , flow rate = 1.5 mL/min,  $\lambda = 254$  nm) retention time: 2.9 min, 9.3 min. dr > 95:5 determined by <sup>1</sup>H NMR.

<sup>1</sup>H NMR (400 MHz, Chloroform-*d*)  $\delta = 9.23$  (s, 1H), 8.18 – 8.05 (m, 2H), 7.59 – 7.55 (m, 1H), 7.49 – 7.36 (m, 7H), 1.95 – 1.88 (m, 1H), 1.61 – 1.53 (m, 1H), 1.11 – 1.03 (m, 1H), 1.01 – 0.78 (m, 3H), 0.55 (t,  $J = 7.2$  Hz, 3H) ppm.

<sup>13</sup>C{<sup>1</sup>H} NMR (100 MHz, Chloroform-*d*)  $\delta = 175.7, 174.1, 163.9, 132.8, 132.2, 129.5, 129.1, 128.8, 128.8, 126.0, 125.8, 91.5, 83.3, 31.2, 24.6, 22.7, 13.5$  ppm.

**IR** (neat):  $\nu(\text{cm}^{-1})$  3201, 3066, 2958, 2870, 2759, 1792, 1732, 1643, 1580, 1496, 1451, 1329, 1214, 1179, 1115, 1090, 1067, 1025, 771, 696, 639, 515.

**HRMS** (ESI-FT) calcd for  $\text{C}_{21}\text{H}_{21}\text{N}_2\text{O}_3^+$  ( $[\text{M}] + \text{H}^+$ ) = 349.1547, found 349.1547.

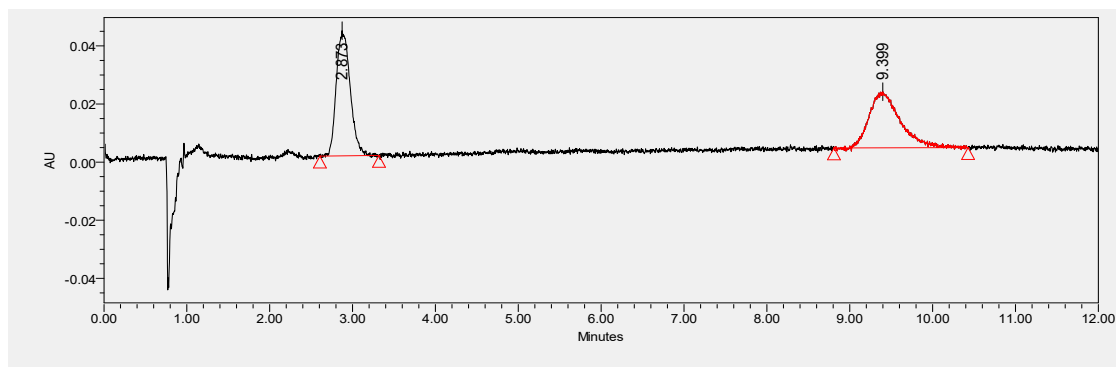

|   | Retention Time | % Area |
|---|----------------|--------|
| 1 | 2.873          | 50.10  |
| 2 | 9.399          | 49.90  |

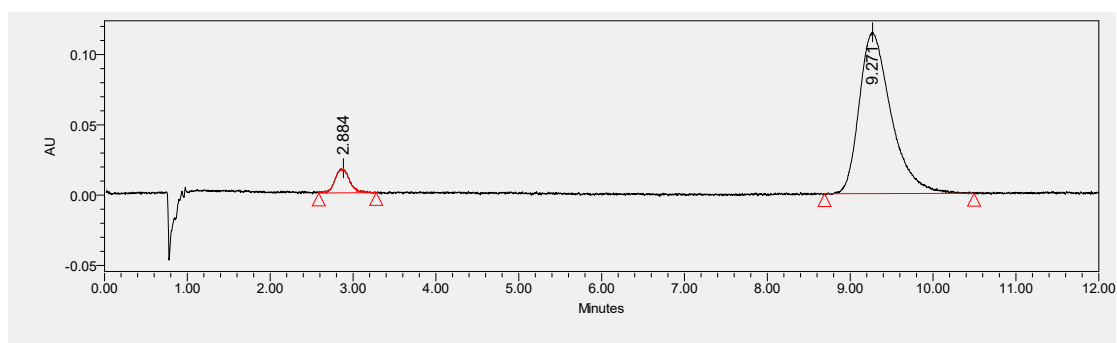

|   | Retention Time | % Area |
|---|----------------|--------|
| 1 | 2.884          | 6.05   |
| 2 | 9.271          | 93.95  |



## 2,6a-Diphenyl-3a-propyl-3a,6a-dihydro-4H-pyrrolo[3,4-d]oxazole-4,6(5H)-dione (4ma)

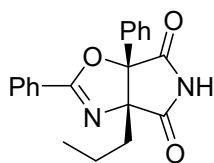

White solid, **M.p.** 180 – 182 °C; 19.6 mg, 59% yield, >95:5 dr, 84% ee.  $[\alpha]^{25}_D = +66.6$  ( $c = 0.36$ , in  $\text{CH}_2\text{Cl}_2$ ).

Dissolved in MeOH for UPC<sup>2</sup>; UPC<sup>2</sup> (Daicel CHIRALPAK **OJ-3**,  $\text{CO}_2/\text{MeOH} = 80/20$ , flow rate = 1.5 mL/min,  $\lambda = 254$  nm) retention time: 1.7 min, 6.8 min. dr > 95:5 determined by <sup>1</sup>H NMR.

**<sup>1</sup>H NMR** (400 MHz, Chloroform-*d*)  $\delta = 9.04$  (s, 1H), 8.12 – 8.10 (m, 2H), 7.59 – 7.55 (m, 1H), 7.49 – 7.41 (m, 5H), 7.38 – 7.35 (m, 2H), 1.92 – 1.84 (m, 1H), 1.55 – 1.48 (m, 1H), 1.21 – 1.11 (m, 1H), 0.95 – 0.85 (m, 1H), 0.57 (t,  $J = 7.2$  Hz, 3H) ppm.

**<sup>13</sup>C{<sup>1</sup>H} NMR** (100 MHz, Chloroform-*d*)  $\delta = 175.5, 174.0, 164.0, 132.8, 132.2, 129.5, 129.1, 128.8, 128.8, 126.0, 125.8, 91.5, 83.4, 33.7, 16.2, 14.3$  ppm.

**IR** (neat):  $\nu(\text{cm}^{-1})$  3211, 3066, 2964, 2874, 2761, 1792, 1732, 1643, 1580, 1496, 1451, 1330, 1217, 1179, 1118, 1090, 1067, 1048, 1026, 1002, 773, 696, 641, 515.

**HRMS** (ESI-FT) calcd for  $\text{C}_{20}\text{H}_{19}\text{N}_2\text{O}_3^+$  ( $[\text{M}] + \text{H}^+$ ) = 335.1390, found 335.1393.

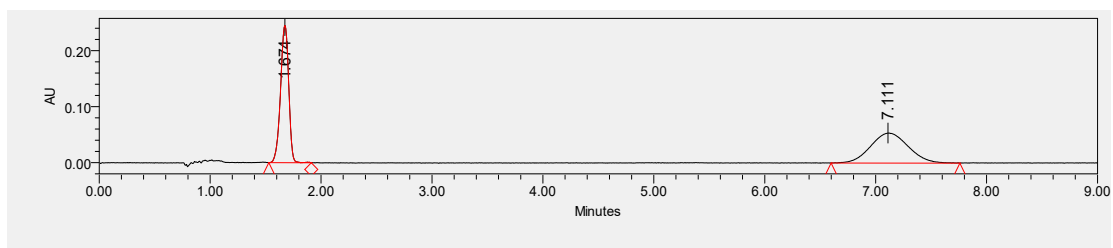

|   | Retention Time | % Area |
|---|----------------|--------|
| 1 | 1.674          | 49.69  |
| 2 | 7.111          | 50.31  |

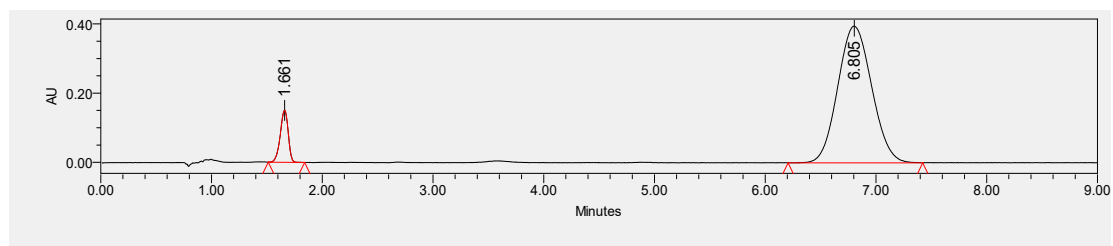

|   | Retention Time | % Area |
|---|----------------|--------|
| 1 | 1.661          | 8.18   |
| 2 | 6.805          | 91.82  |

**3a-Methyl-2,6a-diphenyl-3a,6a-dihydro-4H-pyrrolo[3,4-d]oxazole-4,6(5H)-dione (4na)**

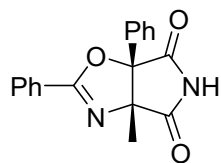

White solid, **M.p.** 93 – 95 °C; 18.0 mg, 59% yield, >95:5 dr, 84% ee.  $[\alpha]^{25}_D = +66.3$  ( $c = 0.32$ , in  $\text{CH}_2\text{Cl}_2$ ).

Dissolved in MeOH for UPC<sup>2</sup>; UPC<sup>2</sup> (Daicel CHIRALPAK **OJ-3**,  $\text{CO}_2/\text{MeOH} = 80/20$ , flow rate = 1.5 mL/min,  $\lambda = 254$  nm) retention time: 1.8 min, 12.7 min. dr > 95:5 determined by <sup>1</sup>H NMR.

<sup>1</sup>H NMR (400 MHz, Chloroform-*d*)  $\delta = 8.11 - 8.09$  (m, 2H), 7.58 – 7.55 (m, 1H), 7.48 – 7.41 (m, 5H), 7.32 – 7.30 (m, 2H), 5.43 (s, 1H), 1.17 (s, 3H) ppm.

<sup>13</sup>C{<sup>1</sup>H} NMR (100 MHz, Chloroform-*d*)  $\delta = 176.6, 174.6, 164.0, 132.9, 132.5, 129.5, 129.1, 129.0, 128.8, 125.8, 91.8, 80.9, 18.8$  ppm.

**IR** (neat):  $\nu(\text{cm}^{-1})$  3191, 3065, 2931, 2760, 1793, 1733, 1642, 1602, 1580, 1496, 1451, 1377, 1328, 1229, 1179, 1146, 1120, 1087, 1068, 1031, 1003, 970, 771, 696, 627, 604, 500, 432.

**HRMS** (ESI-FT) calcd for  $\text{C}_{18}\text{H}_{14}\text{N}_2\text{O}_3\text{Na}^+$  ( $[\text{M}] + \text{Na}^+$ ) = 329.0897, found 329.0894.

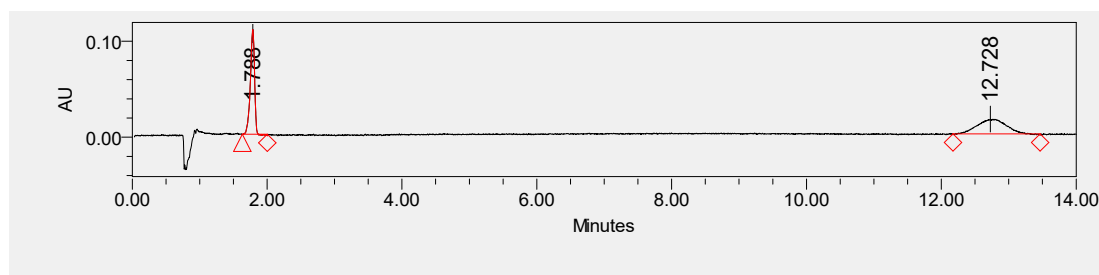

|   | Retention Time | % Area |
|---|----------------|--------|
| 1 | 1.788          | 50.84  |
| 2 | 12.728         | 49.16  |

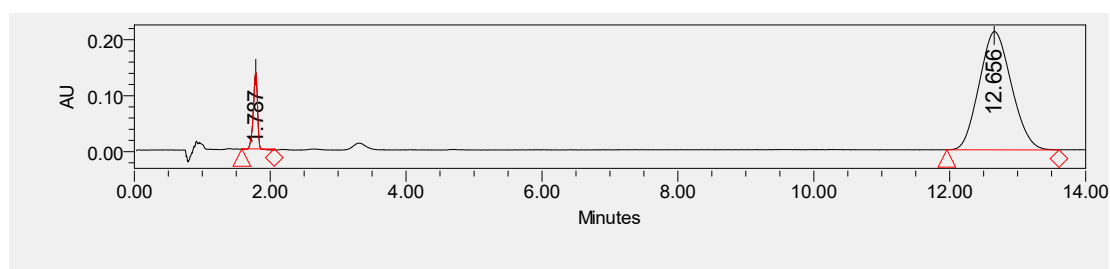

|   | Retention Time | % Area |
|---|----------------|--------|
| 1 | 1.787          | 7.95   |
| 2 | 12.656         | 92.05  |

**3a-Allyl-2,6a-diphenyl-3a,6a-dihydro-4H-pyrrolo[3,4-d]oxazole-4,6(5H)-dione (40a)**

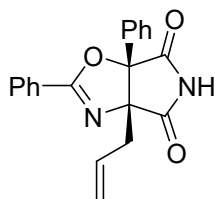

White solid, **M.p.** 183 – 185 °C; 27.9 mg, 84% yield, >95:5 dr, 92% ee.  $[\alpha]_D^{25} = +55.3$  ( $c = 0.55$ , in  $\text{CH}_2\text{Cl}_2$ ).

Dissolved in MeOH for UPC<sup>2</sup>; UPC<sup>2</sup> (Daicel CHIRALPAK **OJ-3**,  $\text{CO}_2/\text{MeOH} = 80/20$ , flow rate = 1.5 mL/min,  $\lambda = 254$  nm) retention time: 1.6 min, 5.7 min. dr > 95:5 determined by <sup>1</sup>H NMR.

<sup>1</sup>H NMR (400 MHz, Chloroform-*d*)  $\delta = 9.38$  (s, 1H), 8.12 – 8.10 (m, 2H), 7.59 – 7.55 (m, 1H), 7.49 – 7.45 (m, 2H), 7.41 – 7.40 (m, 3H), 7.35 – 7.32 (m, 2H), 5.32 – 5.21 (m, 1H), 4.76 (dd,  $J = 10.2, 1.8$  Hz, 1H), 4.56 (dd,  $J = 17.2, 1.8$  Hz, 1H), 2.67 (dd,  $J = 14.8, 6.8$  Hz, 1H), 2.44 (dd,  $J = 14.8, 7.2$  Hz, 1H) ppm.

<sup>13</sup>C{<sup>1</sup>H} NMR (100 MHz, Chloroform-*d*)  $\delta = 175.1, 174.0, 164.3, 132.9, 131.9, 129.7, 129.6, 129.2, 128.8, 128.7, 126.4, 125.7, 120.0, 91.3, 82.7, 35.9$  ppm.

IR (neat):  $\nu(\text{cm}^{-1})$  3214, 3073, 2760, 1793, 1735, 1642, 1580, 1495, 1451, 1431, 1330, 1215, 1160, 1093, 1067, 1027, 999, 925, 770, 696, 652, 625, 564, 505.

HRMS (ESI-FT) calcd for  $\text{C}_{20}\text{H}_{17}\text{N}_2\text{O}_3^+$  ( $[\text{M}] + \text{H}^+$ ) = 333.1234, found 333.1234.

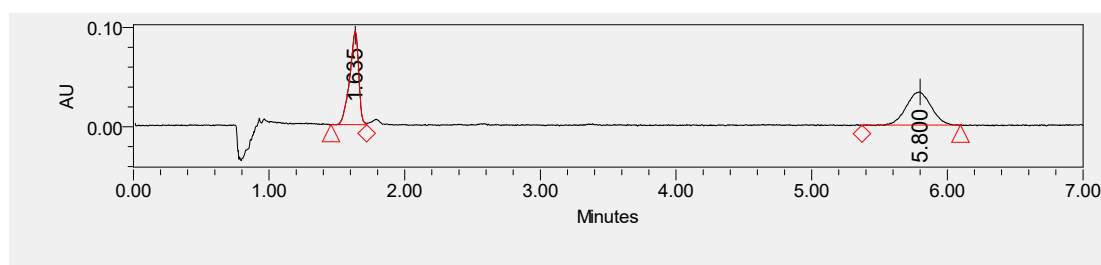

|   | Retention Time | % Area |
|---|----------------|--------|
| 1 | 1.635          | 50.28  |
| 2 | 5.800          | 49.72  |

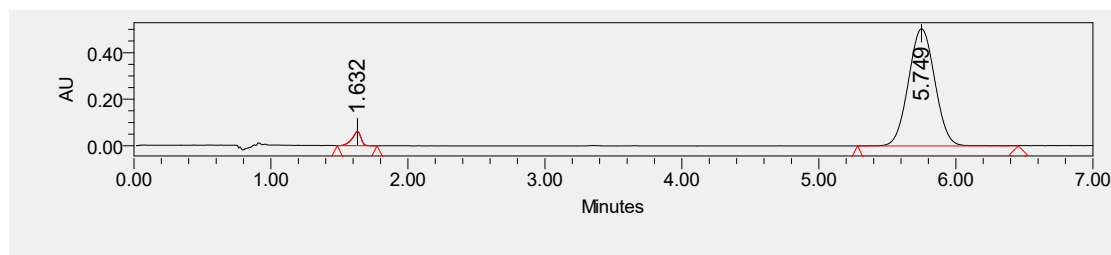

|   | Retention Time | % Area |
|---|----------------|--------|
| 1 | 1.632          | 3.87   |
| 2 | 5.749          | 96.13  |



### 3a-Phenethyl-2,6a-diphenyl-3a,6a-dihydro-4*H*-pyrrolo[3,4-*d*]oxazole-4,6(5*H*)-dione (4pa)

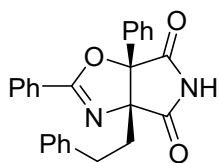

White solid, **M.p.** 94 – 96 °C; 21.9 mg, 55% yield, >95:5 dr, 60% ee.  $[\alpha]_D^{25} = +28.3$  ( $c = 0.27$ , in  $\text{CH}_2\text{Cl}_2$ ).

Dissolved in MeOH for UPC<sup>2</sup>; UPC<sup>2</sup> (Daicel CHIRALPAK **OJ-3**,  $\text{CO}_2/\text{MeOH} = 80/20$ , flow rate = 1.5 mL/min,  $\lambda = 254$  nm) retention time: 3.2 min, 6.8 min. dr > 95:5 determined by <sup>1</sup>H NMR.

<sup>1</sup>H NMR (400 MHz, Chloroform-*d*)  $\delta = 8.96$  (s, 1H), 8.17 – 8.15 (m, 2H), 7.61 – 7.57 (m, 1H), 7.51 – 7.44 (m, 7H), 7.14 – 7.05 (m, 3H), 6.65 – 6.64 (m, 2H), 2.47 (td,  $J = 12.8, 4.8$  Hz, 1H), 2.31 (td,  $J = 13.2, 4.8$  Hz, 1H), 2.12 (m, 1H), 1.80 (m, 1H) ppm.

<sup>13</sup>C{<sup>1</sup>H} NMR (100 MHz, Chloroform-*d*)  $\delta = 175.1, 173.7, 164.3, 141.0, 133.0, 132.2, 129.8, 129.2, 129.1, 128.9, 128.4, 128.3, 126.1, 125.7, 91.5, 83.0, 33.8, 29.2$  ppm.

IR (neat):  $\nu(\text{cm}^{-1})$  3196, 3064, 3028, 2920, 2850, 2763, 1792, 1737, 1642, 1603, 1581, 1496, 1451, 1330, 1218, 1095, 1068, 1029, 997, 751, 696, 627, 560, 498.

HRMS (ESI-FT) calcd for  $\text{C}_{25}\text{H}_{21}\text{N}_2\text{O}_3^+$  ( $[\text{M}] + \text{H}^+$ ) = 397.1547, found 397.1549.

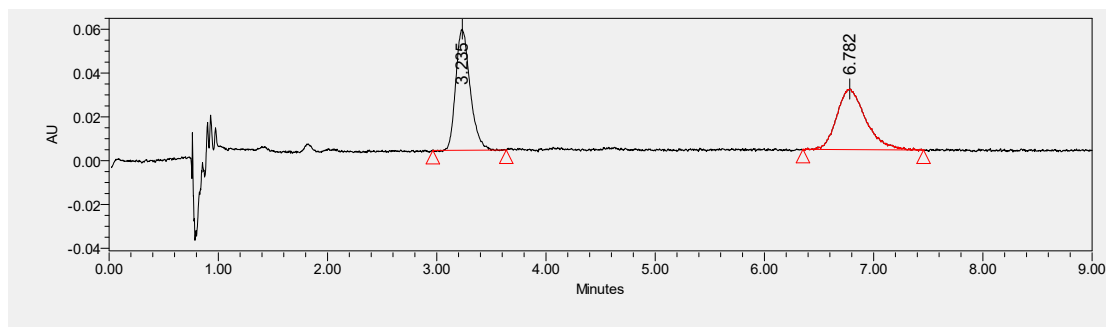

|   | Retention Time | % Area |
|---|----------------|--------|
| 1 | 3.235          | 49.90  |
| 2 | 6.782          | 50.10  |

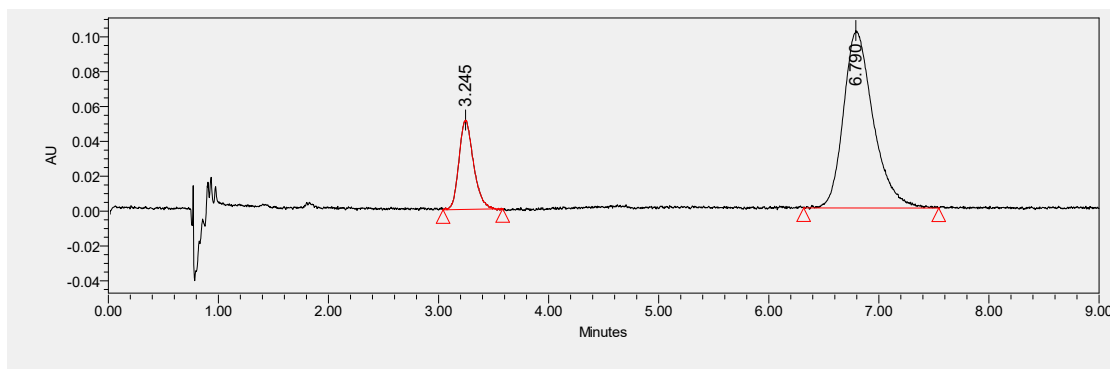

|   | Retention Time | % Area |
|---|----------------|--------|
| 1 | 3.245          | 19.83  |
| 2 | 6.790          | 80.17  |

**3a-(Naphthalen-2-ylmethyl)-2,6a-diphenyl-3a,6a-dihydro-4H-pyrrolo[3,4-d]oxazole-4,6(5H)-dione (4qa)**

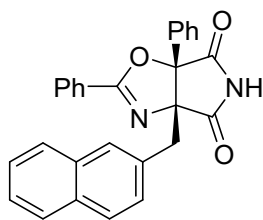

White solid, **M.p.** 98 – 100 °C; 43.0 mg, 99% yield, >95:5 dr, 94% ee.  $[\alpha]_{436}^{25} = -42.8$  ( $c = 0.59$ , in  $\text{CH}_2\text{Cl}_2$ ).

Dissolved in MeOH for UPC<sup>2</sup>; UPC<sup>2</sup> (Daicel CHIRALPAK **OJ-3**,  $\text{CO}_2/\text{MeOH} = 80/20$ , flow rate = 1.5 mL/min,  $\lambda = 254$  nm) retention time: 17.3 min, 22.6 min. dr > 95:5 determined by <sup>1</sup>H NMR.

<sup>1</sup>H NMR (400 MHz, Chloroform-*d*)  $\delta = 9.34$  (s, 1H), 8.09 – 8.07 (m, 2H), 7.66 – 7.64 (m, 1H), 7.56 – 7.53 (m, 1H), 7.47 – 7.42 (m, 4H), 7.37 – 7.29 (m, 5H), 7.11 – 7.09 (m, 2H), 6.95 – 6.93 (m, 1H), 6.52 – 6.51 (m, 1H), 3.68 (d,  $J = 14.6$  Hz, 1H), 3.14 (d,  $J = 14.6$  Hz, 1H) ppm.

<sup>13</sup>C{<sup>1</sup>H} NMR (100 MHz, Chloroform-*d*)  $\delta = 175.4, 174.1, 164.2, 132.9, 132.7, 132.1, 131.9, 130.9, 129.7, 129.5, 129.1, 128.9, 128.8, 127.9, 127.4, 126.8, 126.4, 125.6, 125.6, 91.4, 83.0, 36.6$  ppm.

**IR** (neat):  $\nu(\text{cm}^{-1})$  3211, 3060, 2760, 1793, 1731, 1641, 1602, 1580, 1497, 1450, 1429, 1329, 1265, 1215, 1160, 1092, 1067, 1024, 977, 899, 859, 821, 763, 736, 696, 653, 627, 587, 539, 479, 455, 436.

**HRMS** (ESI-FT) calcd for  $\text{C}_{28}\text{H}_{21}\text{N}_2\text{O}_3^+$  ( $[\text{M}] + \text{H}^+$ ) = 433.1547, found 433.1554.

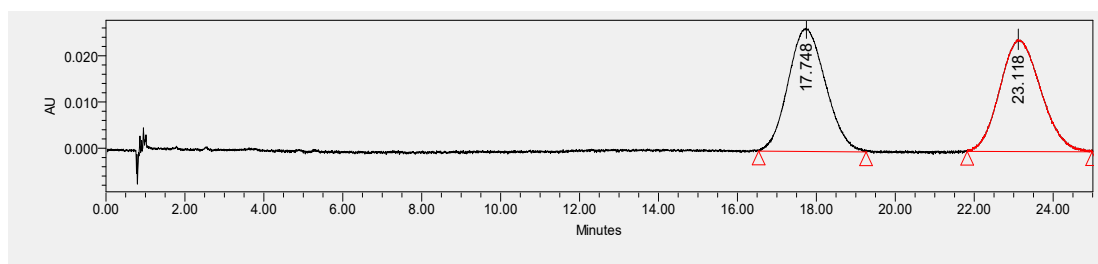

|   | Retention Time | % Area |
|---|----------------|--------|
| 1 | 17.748         | 50.17  |
| 2 | 23.118         | 49.83  |

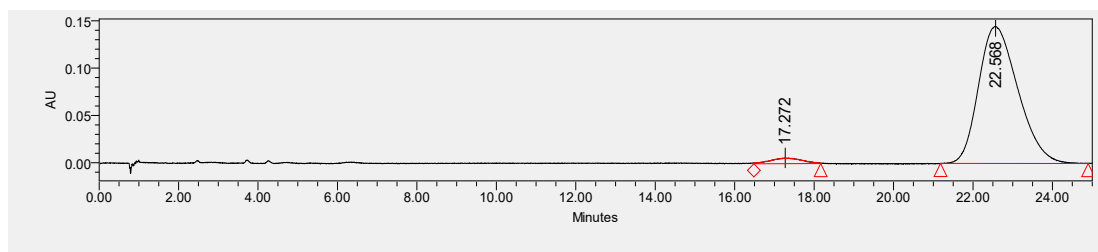

|   | Retention Time | % Area |
|---|----------------|--------|
| 1 | 17.272         | 3.16   |
| 2 | 22.568         | 96.84  |

**3a-(Naphthalen-1-ylmethyl)-6a-phenyl-2-(*p*-tolyl)-3a,6a-dihydro-4*H*-pyrrolo[3,4-*d*]oxazole-4,6(5*H*)-dione (4ra)**

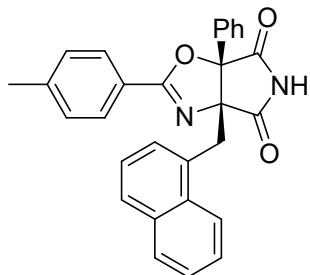

White solid, **M.p.** 99 – 101 °C; 44.6 mg, 99% yield, >95:5 dr, 91% ee.  $[\alpha]^{25}_D = +57.6$  ( $c = 0.82$ , in  $\text{CH}_2\text{Cl}_2$ ).

Dissolved in MeOH for UPC<sup>2</sup>; UPC<sup>2</sup> (Daicel CHIRALPAK **OJ-3**,  $\text{CO}_2/\text{MeOH} = 80/20$ , flow rate = 1.5 mL/min,  $\lambda = 254$  nm) retention time: 4.1 min, 6.7 min. dr > 95:5 determined by <sup>1</sup>H NMR.

<sup>1</sup>H NMR (400 MHz, Chloroform-*d*)  $\delta = 9.39$  (s, 1H), 7.99 – 7.97 (m, 1H), 7.67 – 7.64 (m, 3H), 7.58 – 7.56 (m, 1H), 7.39 – 7.34 (m, 2H), 7.30 – 7.28 (m, 3H), 7.24 – 7.22 (m, 2H), 7.12 – 7.10 (m, 2H), 7.07 – 7.04 (m, 1H), 6.54 – 6.52 (m, 1H), 3.94 (d,  $J = 15.2$  Hz, 1H), 3.22 (d,  $J = 15.2$  Hz, 1H) ppm.

<sup>13</sup>C{<sup>1</sup>H} NMR (100 MHz, Chloroform-*d*)  $\delta = 175.6, 174.3, 164.0, 143.3, 133.6, 133.2, 132.0, 130.5, 129.4, 129.3, 129.0, 128.9, 128.7, 128.2, 127.8, 126.1, 125.4, 125.3, 125.1, 124.7, 122.8, 92.1, 83.1, 32.9, 21.8$  ppm.

**IR** (neat):  $\nu(\text{cm}^{-1})$  3207, 3063, 2926, 2759, 1792, 1729, 1640, 1573, 1512, 1450, 1398, 1328, 1265, 1214, 1182, 1092, 972, 915, 829, 780, 729, 698, 661, 630, 588, 536, 512, 462, 417.

**HRMS** (ESI-FT) calcd for  $\text{C}_{29}\text{H}_{23}\text{N}_2\text{O}_3^+$  ( $[\text{M}] + \text{H}^+$ ) = 447.1703, found 447.1708.

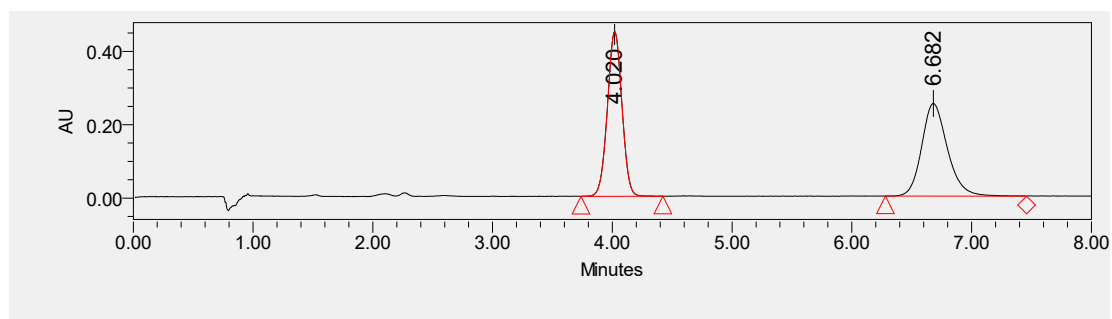

|   | Retention Time | % Area |
|---|----------------|--------|
| 1 | 4.020          | 50.08  |
| 2 | 6.682          | 49.92  |

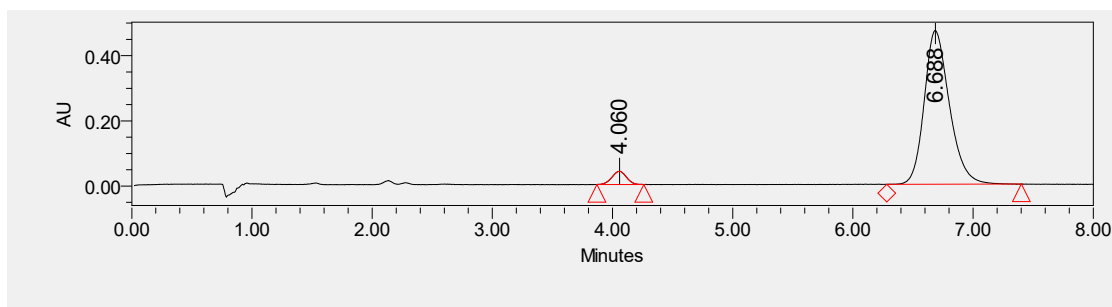

|   | Retention Time | % Area |
|---|----------------|--------|
| 1 | 4.060          | 4.73   |
| 2 | 6.688          | 95.27  |

**2,6a-Diphenyl-3a-(thiophen-2-ylmethyl)-3a,6a-dihydro-4H-pyrrolo[3,4-d]oxazole-4,6(5H)-dione (4sa)**

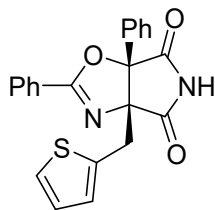

White solid, **M.p.** 116 – 118 °C; 37.4 mg, 96% yield, >95:5 dr, 93% ee.  $[\alpha]_D^{25} = +21.2$  ( $c = 0.59$ , in  $\text{CH}_2\text{Cl}_2$ ).

Dissolved in MeOH for UPC<sup>2</sup>; UPC<sup>2</sup> (Daicel CHIRALPAK **OJ-3**,  $\text{CO}_2/\text{MeOH} = 80/20$ , flow rate = 1.5 mL/min,  $\lambda = 254$  nm) retention time: 2.8 min, 5.2 min. dr > 95:5 determined by <sup>1</sup>H NMR.

<sup>1</sup>H NMR (400 MHz, Chloroform-*d*)  $\delta = 9.43$  (s, 1H), 8.14 – 8.13 (m, 2H), 7.60 – 7.56 (m, 1H), 7.50 – 7.46 (m, 2H), 7.34 – 7.31 (m, 1H), 7.28 – 7.24 (m, 2H), 7.09 – 7.07 (m, 2H), 6.91 – 6.90 (m, 1H), 6.51 – 6.48 (m, 1H), 5.72 – 5.71 (m, 1H), 3.65 (d,  $J = 15.6$  Hz, 1H), 3.25 (d,  $J = 15.6$  Hz, 1H) ppm.

<sup>13</sup>C{<sup>1</sup>H} NMR (100 MHz, Chloroform-*d*)  $\delta = 175.2, 174.1, 165.2, 134.9, 133.0, 131.7, 129.3, 129.2, 128.8, 128.6, 127.5, 125.8, 125.7, 125.3, 91.2, 82.7, 31.7$  ppm.

**IR** (neat):  $\nu(\text{cm}^{-1})$  3193, 3067, 2759, 1792, 1732, 1640, 1603, 1580, 1496, 1450, 1423, 1330, 1269, 1227, 1207, 1178, 1156, 1093, 1067, 1046, 1026, 976, 851, 765, 736, 695, 651, 625, 587, 504.

**HRMS** (ESI-FT) calcd for  $\text{C}_{22}\text{H}_{17}\text{N}_2\text{O}_3\text{S}^+$  ( $[\text{M}] + \text{H}^+$ ) = 389.0954, found 389.0944.

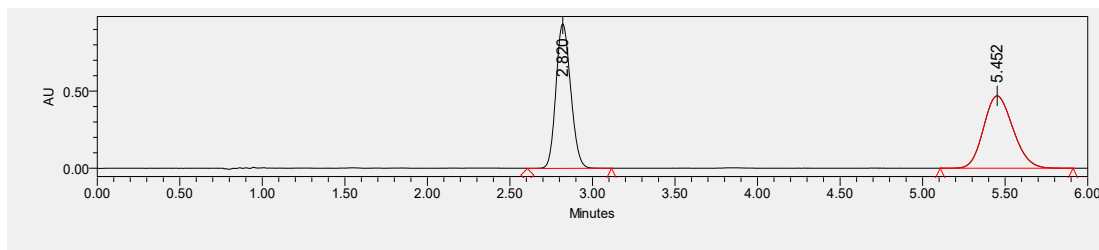

|   | Retention Time | % Area |
|---|----------------|--------|
| 1 | 2.820          | 50.13  |
| 2 | 5.452          | 49.87  |

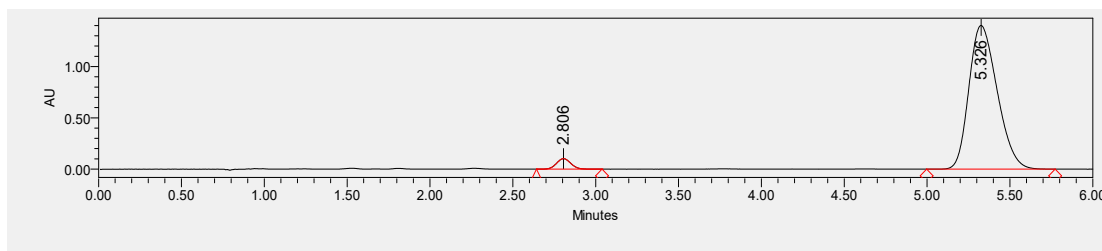

|   | Retention Time | % Area |
|---|----------------|--------|
| 1 | 2.806          | 3.54   |
| 2 | 5.326          | 96.46  |

**3a-(4-Methoxybenzyl)-2,6a-diphenyl-3a,6a-dihydro-4H-pyrrolo[3,4-d]oxazole-4,6(5H)-dione (4ta)**

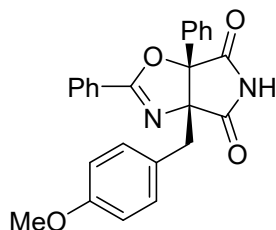

White solid, **M.p.** 95 – 97 °C; 36.3 mg, 88% yield, >95:5 dr, 87% ee.  $[\alpha]_D^{25} = +35.0$  ( $c = 0.60$ , in  $\text{CH}_2\text{Cl}_2$ ).

Dissolved in MeOH for UPC<sup>2</sup>; UPC<sup>2</sup> (Daicel CHIRALPAK OJ-3,  $\text{CO}_2/\text{MeOH} = 80/20$ , flow rate = 1.5 mL/min,  $\lambda = 254$  nm) retention time: 4.3 min, 5.2 min. dr > 95:5 determined by <sup>1</sup>H NMR.

<sup>1</sup>H NMR (400 MHz, Chloroform-*d*)  $\delta = 9.32$  (s, 1H), 8.09 – 8.07 (m, 2H), 7.58 – 7.54 (m, 1H), 7.48 – 7.44 (m, 2H), 7.42 – 7.38 (m, 1H), 7.36 – 7.32 (m, 2H), 7.13 – 7.11 (m, 2H), 6.44 – 6.42 (m, 2H), 6.38 – 6.36 (m, 2H), 3.66 (s, 3H), 3.39 (d,  $J = 14.8$  Hz, 1H), 2.92 (d,  $J = 14.8$  Hz, 1H) ppm.

<sup>13</sup>C{<sup>1</sup>H} NMR (100 MHz, Chloroform-*d*)  $\delta = 175.5, 174.2, 164.0, 158.2, 132.8, 132.0, 131.6, 129.4, 129.1, 128.8, 126.3, 125.8, 125.4, 112.9, 91.3, 83.2, 55.2, 35.7$  ppm.

**IR** (neat):  $\nu(\text{cm}^{-1})$  3193, 3064, 2934, 2836, 2761, 1792, 1733, 1642, 1612, 1581, 1513, 1496, 1450, 1331, 1303, 1251, 1216, 1180, 1112, 1093, 1067, 1030, 975, 827, 766, 737, 696, 643, 589, 551, 507, 430.

**HRMS** (ESI-FT) calcd for  $\text{C}_{25}\text{H}_{21}\text{N}_2\text{O}_4^+$  ( $[\text{M}] + \text{H}^+$ ) = 413.1496, found 413.1493.

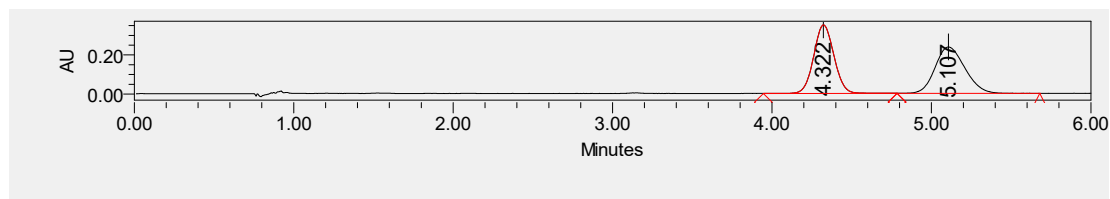

|   | Retention Time | % Area |
|---|----------------|--------|
| 1 | 4.322          | 50.18  |
| 2 | 5.107          | 49.82  |

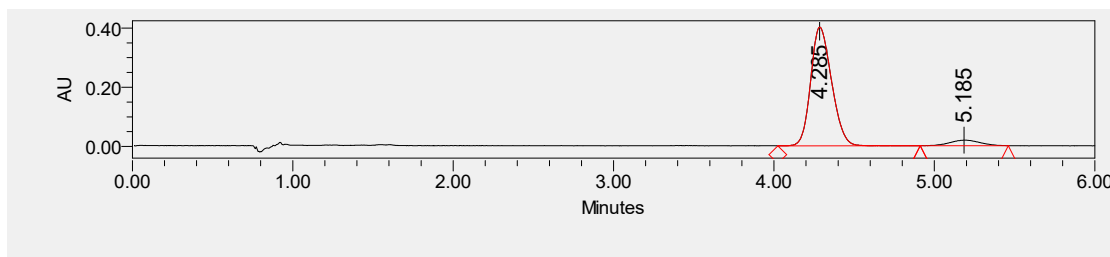

|   | Retention Time | % Area |
|---|----------------|--------|
| 1 | 4.285          | 93.59  |
| 2 | 5.185          | 6.41   |

**3a-(4-Chlorobenzyl)-2,6a-diphenyl-3a,6a-dihydro-4H-pyrrolo[3,4-d]oxazole-4,6(5H)-dione (4ua)**

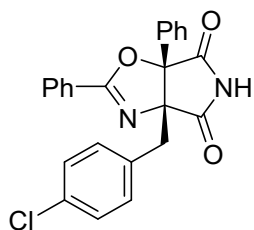

White solid, **M.p.** 94 – 96 °C; 41.5 mg, 99% yield, >95:5 dr, 90% ee.  $[\alpha]_D^{25} = +40.8$  ( $c = 1.15$ , in  $\text{CH}_2\text{Cl}_2$ ).

Dissolved in MeOH for UPC<sup>2</sup>; UPC<sup>2</sup> (Daicel CHIRALPAK **OJ-3**,  $\text{CO}_2/\text{MeOH} = 90/10$ , flow rate = 1.5 mL/min,  $\lambda = 254$  nm) retention time: 13.8 min, 17.4 min. dr > 95:5 determined by <sup>1</sup>H NMR.

<sup>1</sup>H NMR (400 MHz, Chloroform-*d*)  $\delta = 9.70$  (s, 1H), 8.08 – 8.06 (m, 2H), 7.58 – 7.55 (m, 1H), 7.48 – 7.44 (m, 2H), 7.42 – 7.39 (m, 1H), 7.36 – 7.32 (m, 2H), 7.13 – 7.11 (m, 2H), 6.87 – 6.85 (m, 2H), 6.41 – 6.39 (m, 2H), 3.44 (d,  $J = 14.8$  Hz, 1H), 2.87 (d,  $J = 14.8$  Hz, 1H) ppm.

<sup>13</sup>C{<sup>1</sup>H} NMR (100 MHz, Chloroform-*d*)  $\delta = 175.5, 174.2, 164.3, 133.0, 132.5, 132.0, 131.9, 131.8, 129.5, 129.1, 128.9, 127.6, 126.2, 125.5, 91.3, 82.9, 35.8$  ppm.

**IR** (neat):  $\nu(\text{cm}^{-1})$  3198, 3065, 2926, 2762, 1793, 1726, 1641, 1601, 1580, 1493, 1450, 1431, 1409, 1330, 1264, 1214, 1091, 1067, 1050, 1016, 976, 916, 837, 815, 766, 737, 695, 641, 585, 519, 491.

**HRMS** (ESI-FT) calcd for  $\text{C}_{24}\text{H}_{17}^{34.9659}\text{ClN}_2\text{O}_3\text{K}^+$  ( $[\text{M}]+\text{K}^+$ ) = 455.0559, found 455.0548,  $\text{C}_{24}\text{H}_{17}^{36.9659}\text{ClN}_2\text{O}_3\text{K}^+$  ( $[\text{M}]+\text{K}^+$ ) = 457.0530, found 457.0532.

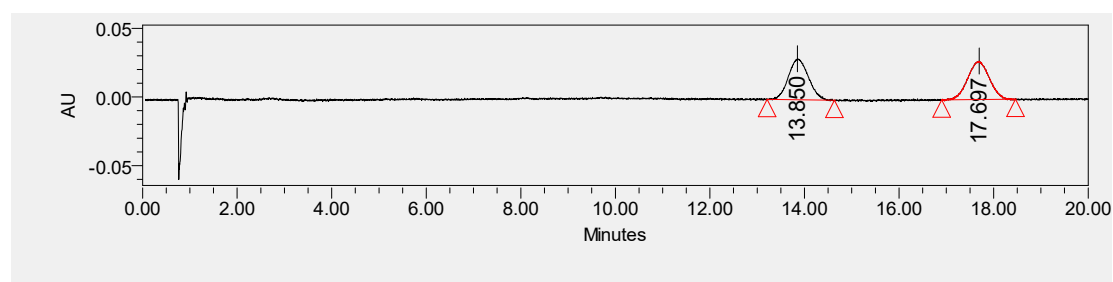

|   | Retention Time | % Area |
|---|----------------|--------|
| 1 | 13.850         | 49.84  |
| 2 | 17.697         | 50.16  |

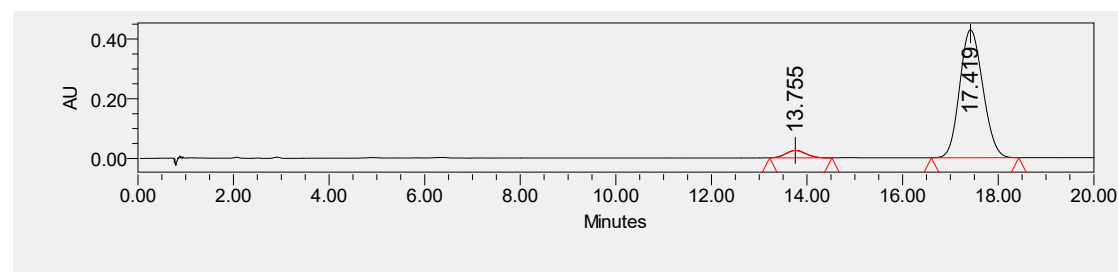

|   | Retention Time | % Area |
|---|----------------|--------|
| 1 | 13.755         | 4.82   |
| 2 | 17.419         | 95.18  |

**3a-(2-Methylbenzyl)-6a-phenyl-2-(*p*-tolyl)-3a,6a-dihydro-4*H*-pyrrolo[3,4-*d*]oxazole-4,6(5*H*)-dione (4va)**

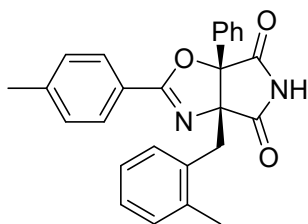

White solid, **M.p.** 102 – 104 °C; 35.7 mg, 87% yield, >95:5 dr, 91% ee.  $[\alpha]_D^{25} = +68.8$  ( $c = 0.65$ , in  $\text{CH}_2\text{Cl}_2$ ).

Dissolved in MeOH for UPC<sup>2</sup>; UPC<sup>2</sup> (Daicel CHIRALPAK OJ-3,  $\text{CO}_2/\text{MeOH} = 90/10$ , flow rate = 1.5 mL/min,  $\lambda = 254$  nm) retention time: 5.4 min, 8.5 min. dr > 95:5 determined by <sup>1</sup>H NMR.

<sup>1</sup>H NMR (400 MHz, Chloroform-*d*)  $\delta = 9.25$  (s, 1H), 7.93 – 7.91 (m, 2H), 7.38 – 7.33 (m, 3H), 7.25 – 7.20 (m, 4H), 6.99 – 6.96 (m, 1H), 6.92 – 6.86 (m, 2H), 6.72 – 6.70 (m, 1H), 3.27 (d,  $J = 15.0$  Hz, 1H), 2.80 (d,  $J = 15.0$  Hz, 1H), 2.40 (s, 3H), 2.00 (s, 3H) ppm.

<sup>13</sup>C{<sup>1</sup>H} NMR (100 MHz, Chloroform-*d*)  $\delta = 175.4, 174.2, 164.1, 143.5, 138.2, 132.9, 132.0, 130.5, 130.1, 129.5, 129.4, 129.1, 128.8, 126.9, 126.3, 125.3, 123.0, 92.1, 83.3, 33.7, 21.8, 20.2$  ppm.

**IR** (neat):  $\nu(\text{cm}^{-1})$  3212, 3064, 2925, 2760, 1792, 1732, 1640, 1573, 1512, 1496, 1450, 1411, 1329, 1265, 1214, 1181, 1116, 1080, 1045, 1019, 973, 829, 729, 696, 644, 537, 467.

**HRMS** (ESI-FT) calcd for  $\text{C}_{26}\text{H}_{23}\text{N}_2\text{O}_3^+$  ( $[\text{M}] + \text{H}^+$ ) = 411.1703, found 411.1710.

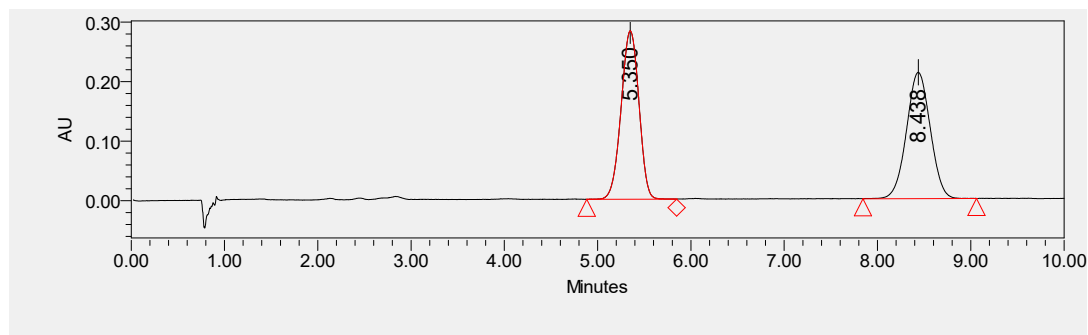

|   | Retention Time | % Area |
|---|----------------|--------|
| 1 | 5.350          | 49.98  |
| 2 | 8.438          | 50.02  |

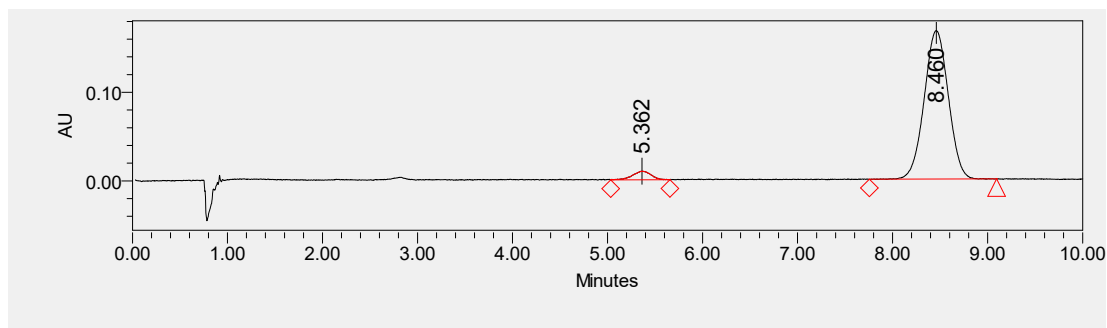

|   | Retention Time | % Area |
|---|----------------|--------|
| 1 | 5.362          | 4.26   |
| 2 | 8.460          | 95.74  |

**3a-(4-Methylbenzyl)-6a-phenyl-2-(*p*-tolyl)-3a,6a-dihydro-4*H*-pyrrolo[3,4-*d*]oxazole-4,6(5*H*)-dione (4wa)**

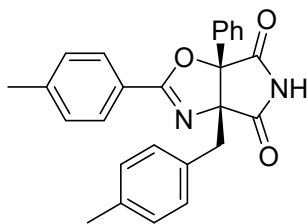

Pale yellow solid, **M.p.** 106 – 108 °C; 40.0 mg, 98% yield, > 95:5 dr, 90% ee.  $[\alpha]^{25}_D = +25.1$  ( $c = 0.54$ , in  $\text{CH}_2\text{Cl}_2$ ).

Dissolved in MeOH for UPC<sup>2</sup>; UPC<sup>2</sup> (Daicel CHIRALPAK OJ-3,  $\text{CO}_2/\text{MeOH} = 90/10$ , flow rate = 1.5 mL/min,  $\lambda = 254$  nm) retention time: 5.4 min, 6.5 min. dr > 95:5 determined by <sup>1</sup>H NMR.

<sup>1</sup>H NMR (400 MHz, Chloroform-*d*)  $\delta = 9.23$  (s, 1H), 7.98 – 7.96 (m, 2H), 7.41 – 7.38 (m, 1H), 7.34 – 7.30 (m, 2H), 7.25 (s, 2H), 7.12 – 7.10 (m, 2H), 6.71 – 6.69 (m, 2H), 6.37 – 6.35 (m, 2H), 3.38 (d,  $J = 14.6$  Hz, 1H), 2.93 (d,  $J = 14.6$  Hz, 1H), 2.42 (s, 3H), 2.16 (s, 3H) ppm.

<sup>13</sup>C{<sup>1</sup>H} NMR (100 MHz, Chloroform-*d*)  $\delta = 175.6, 174.2, 164.2, 143.5, 136.0, 132.0, 130.4, 130.3, 129.5, 129.3, 129.1, 128.7, 128.3, 126.3, 123.0, 91.3, 83.2, 36.3, 21.8, 21.1$  ppm.

**IR** (neat):  $\nu(\text{cm}^{-1})$  3204, 3032, 2922, 2760, 1794, 1734, 1640, 1573, 1514, 1450, 1411, 1329, 1213, 1182, 1092, 1050, 1019, 973, 828, 766, 727, 695, 645, 539, 456,

**HRMS** (ESI-FT) calcd for  $\text{C}_{26}\text{H}_{23}\text{N}_2\text{O}_3^+$  ( $[\text{M}] + \text{H}^+$ ) = 411.1703, found 411.1701.

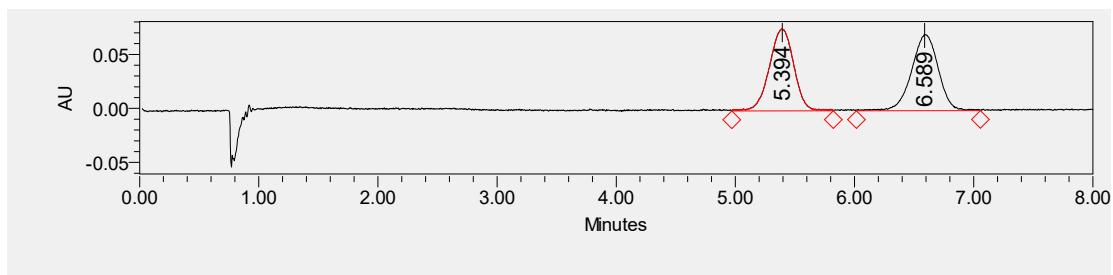

|   | Retention Time | % Area |
|---|----------------|--------|
| 1 | 5.394          | 49.57  |
| 2 | 6.589          | 50.43  |

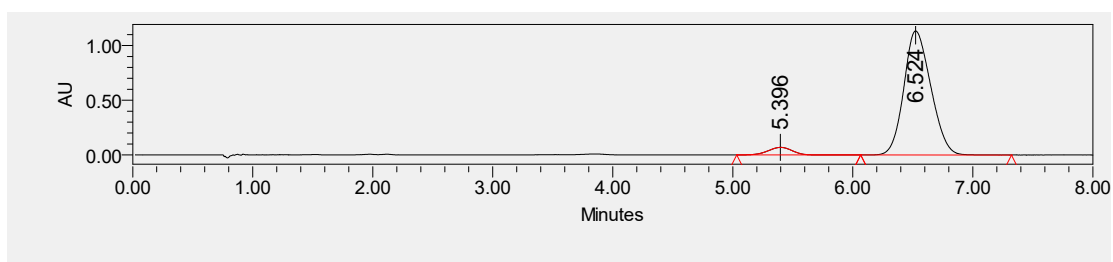

|   | Retention Time | % Area |
|---|----------------|--------|
| 1 | 5.396          | 5.18   |
| 2 | 6.524          | 94.82  |



**3a-(4-Fluorobenzyl)-6a-phenyl-2-(*p*-tolyl)-3a,6a-dihydro-4*H*-pyrrolo[3,4-*d*]oxazole-4,6(5*H*)-dione (4xa)**

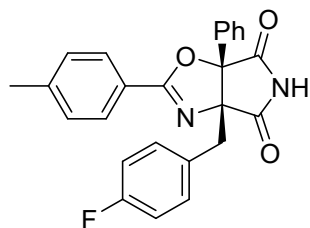

White solid, **M.p.** 93 – 95 °C; 41.0 mg, 98% yield, >95:5 dr, 90% ee.  $[\alpha]_D^{25} = +5.1$  ( $c = 0.73$ , in  $\text{CH}_2\text{Cl}_2$ ).

Dissolved in MeOH for UPC<sup>2</sup>; UPC<sup>2</sup> (Daicel CHIRALPAK OJ-3,  $\text{CO}_2/\text{MeOH} = 90/10$ , flow rate = 1.5 mL/min,  $\lambda = 254$  nm) retention time: 5.4 min, 6.2 min. dr > 95:5 determined by <sup>1</sup>H NMR.

<sup>1</sup>H NMR (400 MHz, Chloroform-*d*)  $\delta = 9.41$  (s, 1H), 7.97 – 7.95 (m, 2H), 7.42 – 7.38 (m, 1H), 7.35 – 7.32 (m, 2H), 7.27 – 7.25 (m, 2H), 7.12 – 7.10 (m, 2H), 6.59 – 6.55 (m, 2H), 6.43 – 6.40 (m, 2H), 3.43 (d,  $J = 14.8$  Hz, 1H), 2.89 (d,  $J = 14.8$  Hz, 1H), 2.42 (s, 3H) ppm.

<sup>13</sup>C{<sup>1</sup>H} NMR (100 MHz, Chloroform-*d*)  $\delta = 175.5$ , 174.2, 164.4, 161.7 (d,  $J = 245.0$  Hz), 143.7, 132.0, 131.9, 129.6, 129.4, 129.2 (d,  $J = 3.2$  Hz), 129.0, 128.8, 126.2, 122.8, 114.3 (d,  $J = 21.1$  Hz), 91.2, 82.9, 35.7, 21.8 ppm.

<sup>19</sup>F{<sup>1</sup>H} NMR (376 MHz, Chloroform-*d*)  $\delta = -116.39$  ppm.

**IR** (neat):  $\nu(\text{cm}^{-1})$  3193, 3066, 2925, 2760, 1793, 1729, 1639, 1606, 1573, 1510, 1450, 1432, 1412, 1328, 1265, 1220, 1182, 1159, 1093, 1049, 1019, 976, 830, 766, 728, 696, 682, 644, 586, 538, 506, 455.

**HRMS** (ESI-FT) calcd for  $\text{C}_{25}\text{H}_{20}\text{FN}_2\text{O}_3^+$  ( $[\text{M}] + \text{H}^+$ ) = 415.1452, found 415.1451.

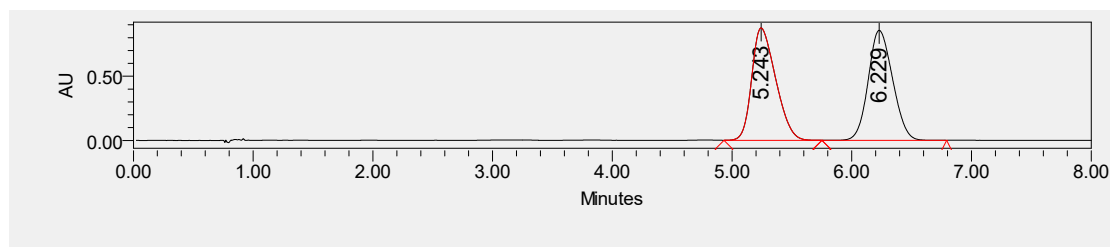

|   | Retention Time | % Area |
|---|----------------|--------|
| 1 | 5.243          | 50.02  |
| 2 | 6.229          | 49.98  |

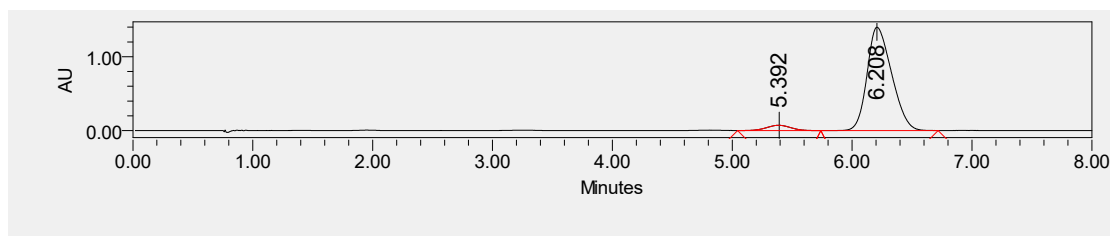

|   | Retention Time | % Area |
|---|----------------|--------|
| 1 | 5.392          | 4.80   |
| 2 | 6.208          | 95.20  |

**3a-(4-Bromobenzyl)-6a-phenyl-2-(*p*-tolyl)-3a,6a-dihydro-4*H*-pyrrolo[3,4-*d*]oxazole-4,6(5*H*)-dione (4ya)**

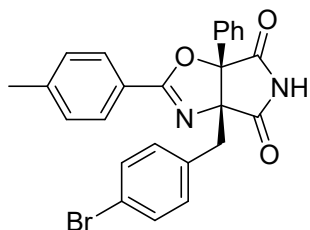

White solid, **M.p.** 136 – 138 °C; 47.1 mg, 99% yield, >95:5 dr, 92% ee.  $[\alpha]_D^{25} = +34.8$  ( $c = 0.82$ , in  $\text{CH}_2\text{Cl}_2$ ).

Dissolved in MeOH for UPC<sup>2</sup>; UPC<sup>2</sup> (Daicel CHIRALPAK OJ-3,  $\text{CO}_2/\text{MeOH} = 80/20$ , flow rate = 1.5 mL/min,  $\lambda = 254$  nm) retention time: 4.5 min, 5.7 min. dr > 95:5 determined by <sup>1</sup>H NMR.

<sup>1</sup>H NMR (400 MHz, Chloroform-*d*)  $\delta = 9.44$  (s, 1H), 7.97 – 7.95 (m, 2H), 7.42 – 7.39 (m, 1H), 7.35 – 7.32 (m, 2H), 7.27 – 7.25 (m, 2H), 7.12 – 7.10 (m, 2H), 7.01 – 6.99 (m, 2H), 6.35 – 6.32 (m, 2H), 3.41 (d,  $J = 14.8$  Hz, 1H), 2.84 (d,  $J = 14.8$  Hz, 1H), 2.42 (s, 3H) ppm.

<sup>13</sup>C{<sup>1</sup>H} NMR (100 MHz, Chloroform-*d*)  $\delta = 175.4, 174.1, 164.4, 143.8, 132.6, 132.2, 132.0, 130.5, 129.6, 129.5, 129.1, 128.9, 126.2, 122.7, 120.7, 91.2, 82.8, 35.9, 21.9$  ppm.

**IR** (neat):  $\nu(\text{cm}^{-1})$  3204, 3065, 2924, 2762, 1793, 1733, 1639, 1573, 1512, 1488, 1450, 1432, 1409, 1328, 1214, 1182, 1076, 1050, 1015, 976, 829, 767, 728, 695, 644, 582, 514, 491, 466.

**HRMS** (ESI-FT) calcd for  $\text{C}_{25}\text{H}_{20}^{78.9183}\text{BrN}_2\text{O}_3^+$  ( $[\text{M}]+\text{H}^+$ ) = 475.0652, found 475.0061,  $\text{C}_{25}\text{H}_{20}^{80.9163}\text{BrN}_2\text{O}_3^+$  ( $[\text{M}]+\text{H}^+$ ) = 477.0631, found 477.0636.

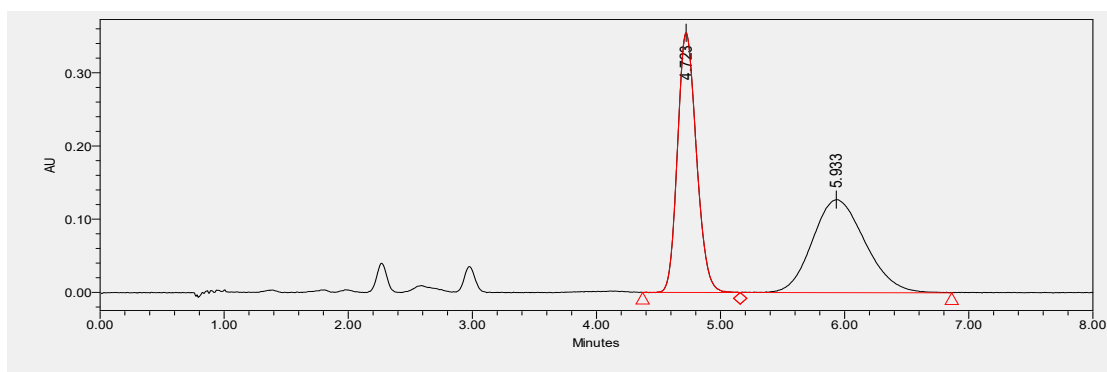

|   | Retention Time | % Area |
|---|----------------|--------|
| 1 | 4.723          | 49.99  |
| 2 | 5.933          | 50.01  |

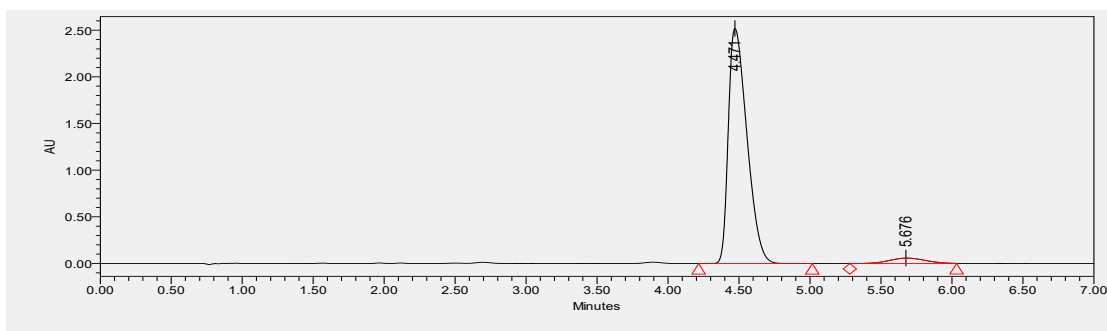

|   | Retention Time | % Area |
|---|----------------|--------|
| 1 | 4.471          | 95.75  |
| 2 | 5.676          | 4.25   |



**3a-Methyl-6a-phenyl-2-(*p*-tolyl)-3a,6a-dihydro-4*H*-pyrrolo[3,4-*d*]oxazole-4,6(5*H*)-dione (4za)**

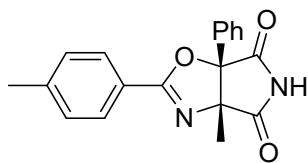

White solid, **M.p.** 172 – 174 °C; 23.2 mg, 73% yield, >95:5 dr, 89% ee.  $[\alpha]^{25}_D = +87.3$  ( $c = 0.40$ , in  $\text{CH}_2\text{Cl}_2$ ).

Dissolved in MeOH for UPC<sup>2</sup>; UPC<sup>2</sup> (Daicel CHIRALPAK **OJ-3**,  $\text{CO}_2/\text{MeOH} = 80/20$ , flow rate = 1.5 mL/min,  $\lambda = 254$  nm) retention time: 1.6 min, 6.6 min. dr > 95:5 determined by <sup>1</sup>H NMR.

**<sup>1</sup>H NMR** (400 MHz, Chloroform-*d*)  $\delta = 9.27$  (s, 1H), 7.99 – 7.97 (m, 2H), 7.46 – 7.39 (m, 3H), 7.31 – 7.26 (m, 4H), 2.42 (s, 3H), 1.17 (s, 3H) ppm.

**<sup>13</sup>C{<sup>1</sup>H} NMR** (100 MHz, Chloroform-*d*)  $\delta = 175.9, 174.0, 164.3, 143.6, 132.4, 129.5, 129.1, 129.0, 125.8, 122.9, 91.5, 80.7, 21.8, 18.8$  ppm.

**IR** (neat):  $\nu(\text{cm}^{-1})$  3202, 3066, 2762, 1793, 1734, 1639, 1574, 1511, 1451, 1411, 1377, 1325, 1229, 1182, 1146, 1118, 1079, 1037, 1003, 967, 830, 770, 728, 697, 631, 451.

**HRMS** (ESI-FT) calcd for  $\text{C}_{19}\text{H}_{17}\text{N}_2\text{O}_3^+$  ( $[\text{M}]+\text{H}^+$ ) = 321.1234, found 321.1234.

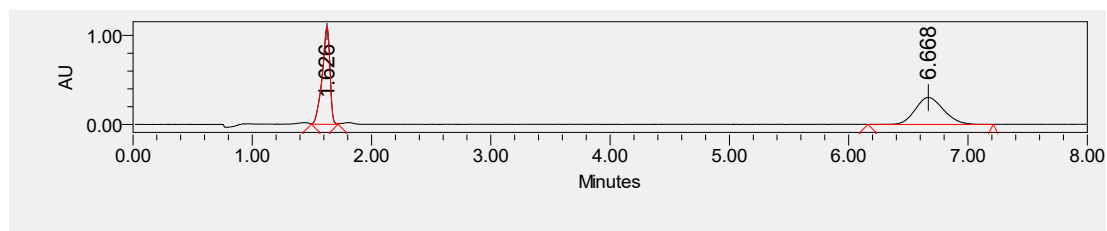

|   | Retention Time | % Area |
|---|----------------|--------|
| 1 | 1.626          | 49.73  |
| 2 | 6.668          | 50.27  |

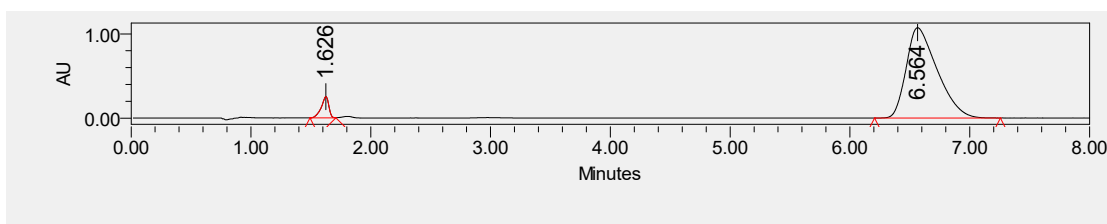

|   | Retention Time | % Area |
|---|----------------|--------|
| 1 | 1.626          | 5.45   |
| 2 | 6.564          | 94.55  |

#### 4-Benzyl-4-(2-nitro-1-phenylethyl)-2-phenyloxazol-5(4H)-one (3aa)

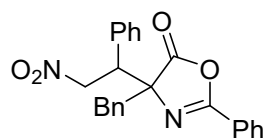

White solid, **M.p.** 117 – 119 °C; 39.8 mg, 99% yield, >95:5 dr, 92% ee.  $[\alpha]_D^{25} = +172.0$  ( $c = 1.38$ , in  $\text{CH}_2\text{Cl}_2$ ).

Dissolved in MeOH for UPC<sup>2</sup>; UPC<sup>2</sup> (Daicel CHIRALPAK **OZ-3**,  $\text{CO}_2/\text{MeOH} = 90/10$ , flow rate = 1.5 mL/min,  $\lambda = 254$  nm) retention time: 1.6 min, 6.6 min. dr > 95:5 determined by <sup>1</sup>H NMR.

**<sup>1</sup>H NMR** (400 MHz, Chloroform-*d*)  $\delta = 7.82 - 7.80$  (m, 2H), 7.56 – 7.53 (m, 3H), 7.45 – 7.33 (m, 5H), 7.11 – 7.10 (m, 3H), 7.05 – 7.04 (M, 2H), 4.83 (dd,  $J = 12.8, 10.8$  Hz, 1H), 4.62 (dd,  $J = 12.8, 4.8$  Hz, 1H), 4.19 (dd,  $J = 10.8, 4.8$  Hz, 1H), 3.05 (d,  $J = 13.2$  Hz, 1H), 2.91 (d,  $J = 13.2$  Hz, 1H) ppm.

**<sup>13</sup>C{<sup>1</sup>H} NMR** (100 MHz, Chloroform-*d*)  $\delta = 178.7, 161.0, 134.4, 133.2, 133.0, 130.3, 129.5, 129.0, 128.9, 128.3, 128.0, 127.6, 125.0, 76.6, 76.2, 50.0, 42.5$  ppm.

**IR** (neat):  $\nu$  ( $\text{cm}^{-1}$ ) 3034, 2925, 1812, 1652, 1555, 1494, 1451, 1377, 1293, 1170, 1104, 1060, 963, 894, 778, 742, 697, 664, 593, 539, 480.

**HRMS** (ESI-FT) calcd for  $\text{C}_{24}\text{H}_{21}\text{N}_2\text{O}_4^+$  ( $[\text{M}] + \text{H}^+$ ) = 401.1496, found 401.1493.

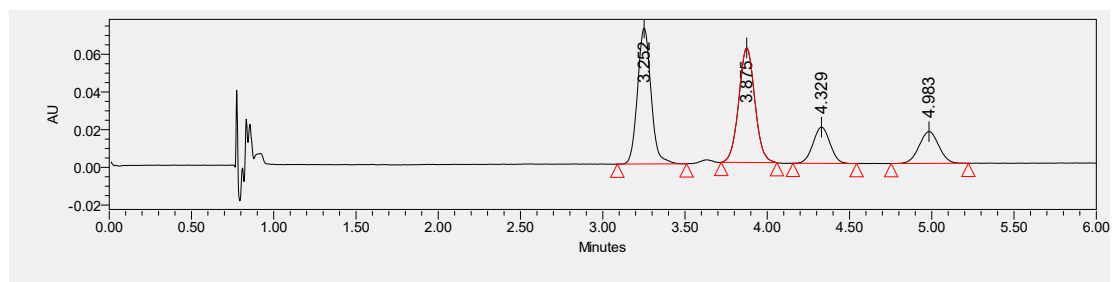

|   | Retention Time | % Area |
|---|----------------|--------|
| 1 | 3.252          | 37.28  |
| 2 | 3.875          | 37.47  |
| 3 | 4.329          | 12.55  |
| 4 | 4.983          | 12.70  |

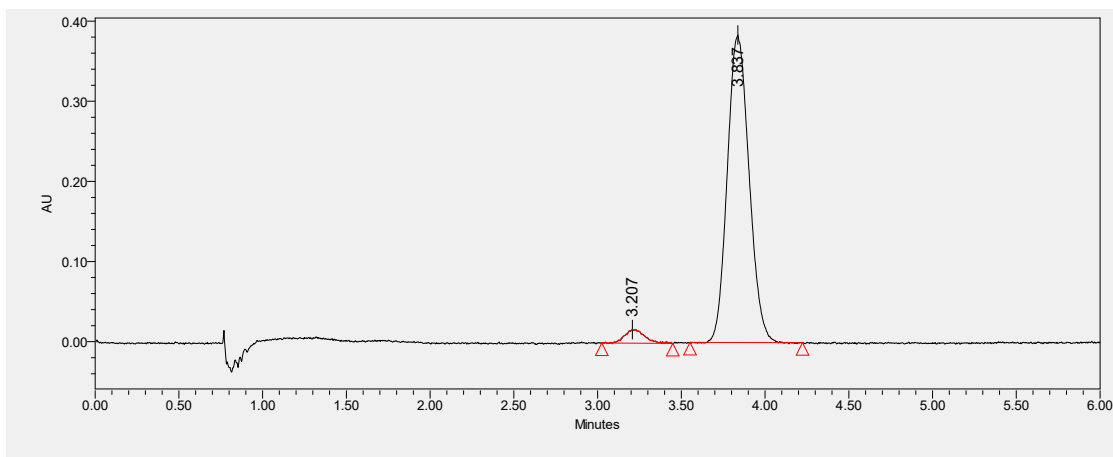

|   | Retention Time | % Area |
|---|----------------|--------|
| 1 | 3.207          | 3.95   |
| 2 | 3.837          | 96.05  |

**3a-Benzyl-4-hydroxy-2,6a-diphenyl-3a,4,5,6a-tetrahydro-6H-pyrrolo[3,4-d]oxazol-6-one (5)**

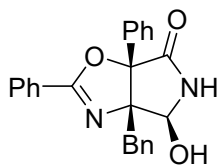

White solid, **M.p.** 93 – 95 °C; 30.7 mg, 80% yield, >95:5 dr, 92% ee.  $[\alpha]_D^{25} = +233.8$  ( $c = 0.23$ , in  $\text{CH}_2\text{Cl}_2$ ).

Dissolved in MeOH for UPC<sup>2</sup>; UPC<sup>2</sup> (Daicel CHIRALPAK **OJ-3**,  $\text{CO}_2/\text{MeOH} = 90/10$ , flow rate = 1.5 mL/min,  $\lambda = 254$  nm) retention time: 9.8 min, 16.4 min. dr > 95:5 determined by <sup>1</sup>H NMR.

<sup>1</sup>H NMR (400 MHz, Chloroform-*d*)  $\delta = 8.12 - 8.11$  (m, 2H), 7.59 – 7.56 (m, 1H), 7.49 – 7.42 (m, 5H), 7.33 – 7.30 (m, 2H), 7.11 – 7.05 (m, 3H), 6.98 (s, 1H), 6.83 – 6.81 (m, 2H), 5.47 (d,  $J = 10.4$  Hz, 1H), 4.10 (d,  $J = 10.4$  Hz, 1H), 2.75 (d,  $J = 14.0$  Hz, 1H), 2.64 (d,  $J = 14.0$  Hz, 1H) ppm.

<sup>13</sup>C{<sup>1</sup>H} NMR (100 MHz, Chloroform-*d*)  $\delta = 171.7, 164.5, 134.5, 133.0, 132.9, 130.7, 129.2, 129.1, 128.9, 128.7, 127.7, 126.8, 126.1, 126.0, 93.5, 83.0, 81.6, 40.6$  ppm.

**IR** (neat):  $\nu(\text{cm}^{-1})$  3240, 3062, 3031, 2924, 1719, 1644, 1604, 1581, 1496, 1450, 1333, 1296, 1257, 1162, 1090, 1069, 1030, 971, 955, 918, 798, 764, 739, 698, 635, 559, 475, 427.

**HRMS** (ESI-FT) calcd for  $\text{C}_{24}\text{H}_{21}\text{N}_2\text{O}_3^+$  ( $[\text{M}]+\text{H}^+$ ) = 385.1547, found 385.1547.

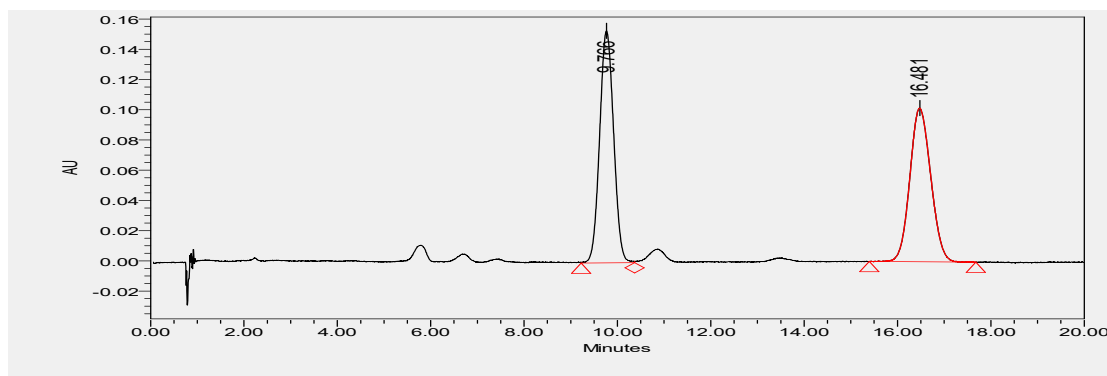

|   | Retention Time | % Area |
|---|----------------|--------|
| 1 | 9.766          | 50.30  |
| 2 | 16.481         | 49.70  |

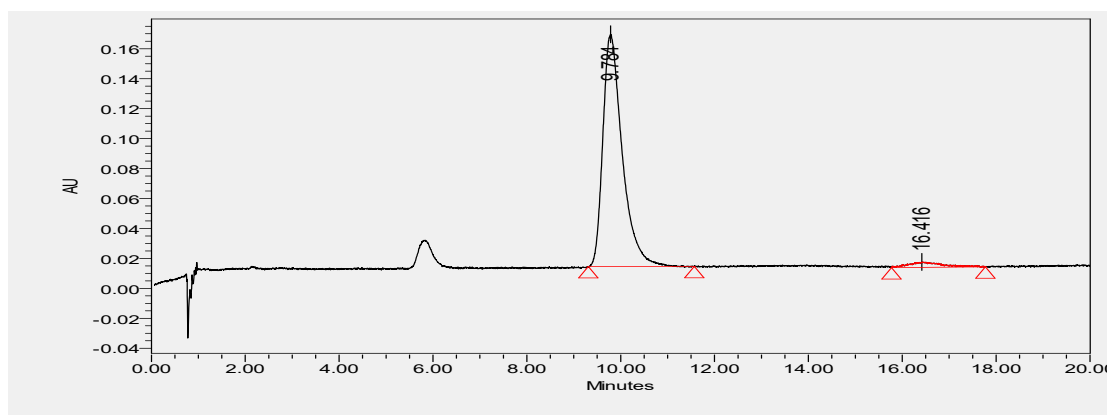

|   | Retention Time | % Area |
|---|----------------|--------|
| 1 | 9.784          | 96.23  |
| 2 | 16.416         | 3.77   |

**3a-Benzyl-5-(but-3-yn-1-yl)-2,6a-diphenyl-3a,6a-dihydro-4H-pyrrolo[3,4-d]oxazole-4,6(5H)-dione (6a)**

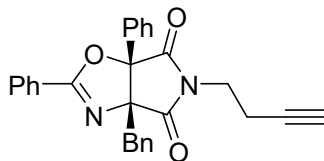

White solid, **M.p.** 133 – 135 °C; 38.3 mg, 88% yield, >95:5 dr, 91% ee.  $[\alpha]_D^{25} = +26.0$  ( $c = 0.87$ , in  $\text{CH}_2\text{Cl}_2$ ).

Dissolved in MeOH for UPC<sup>2</sup>; UPC<sup>2</sup> (Daicel CHIRALPAK **OJ-3**,  $\text{CO}_2/\text{MeOH} = 90/10$ , flow rate = 1.5 mL/min,  $\lambda = 254$  nm) retention time: 2.8 min, 6.3 min. dr > 95:5 determined by <sup>1</sup>H NMR.

<sup>1</sup>H NMR (400 MHz, Chloroform-*d*)  $\delta = 8.10 - 8.08$  (m, 2H), 7.58 – 7.55 (m, 1H), 7.48 – 7.44 (m, 2H), 7.42 – 7.38 (m, 1H), 7.33 – 7.30 (m, 2H), 7.16 – 7.14 (m, 2H), 7.02 – 6.99 (m, 1H), 6.92 – 6.88 (m, 2H), 6.51 – 6.49 (m, 2H), 3.91 – 3.88 (m, 2H), 3.47 (d,  $J = 14.8$  Hz, 1H), 2.98 (d,  $J = 14.8$  Hz, 1H), 2.69 (td,  $J = 6.8, 2.4$  Hz, 2H), 1.93 (t,  $J = 2.4$  Hz, 1H) ppm.

<sup>13</sup>C{<sup>1</sup>H} NMR (100 MHz, Chloroform-*d*)  $\delta = 175.2, 173.8, 163.9, 133.8, 132.8, 132.3, 130.5, 129.3, 129.1, 128.7, 128.7, 127.5, 126.4, 125.9, 90.5, 82.2, 79.8, 71.0, 37.9, 37.1, 17.3$  ppm.

**IR** (neat):  $\nu(\text{cm}^{-1})$  3296, 3063, 3032, 2921, 1790, 1719, 1645, 1603, 1581, 1496, 1450, 1392, 1358, 1331, 1307, 1263, 1192, 1091, 1067, 996, 838, 781, 738, 697, 640, 472.

**HRMS** (ESI-FT) calcd for  $\text{C}_{28}\text{H}_{23}\text{N}_2\text{O}_3^+$  ( $[\text{M}]+\text{H}^+$ ) = 435.1703, found 435.1712.

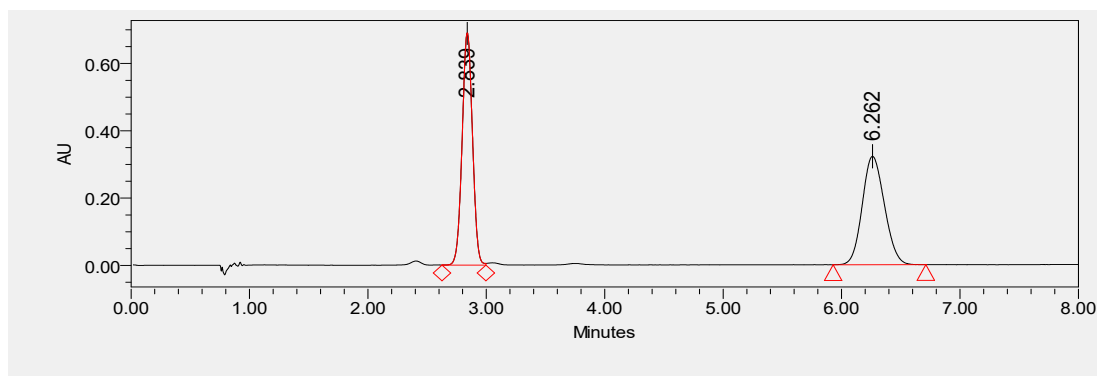

|   | Retention Time | % Area |
|---|----------------|--------|
| 1 | 2.839          | 49.99  |
| 2 | 6.262          | 50.01  |

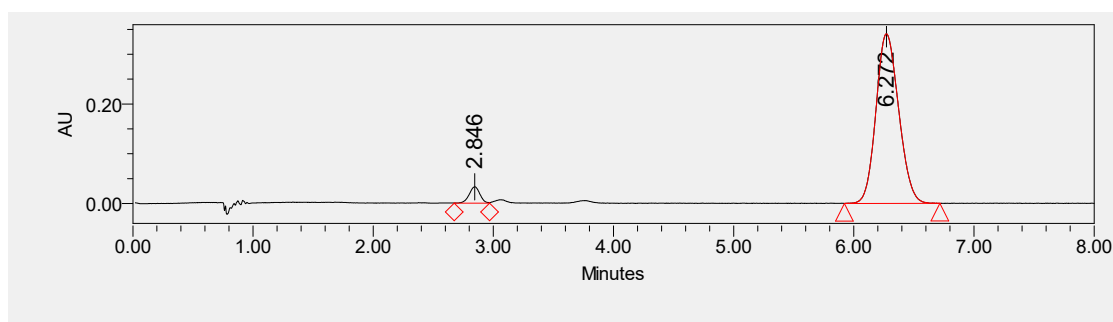

|   | Retention Time | % Area |
|---|----------------|--------|
| 1 | 2.846          | 4.40   |
| 2 | 6.272          | 95.60  |

**3a-Benzyl-5-isopropyl-2,6a-diphenyl-3a,6a-dihydro-4H-pyrrolo[3,4-d]oxazole-4,6(5H)-dione (6b)**

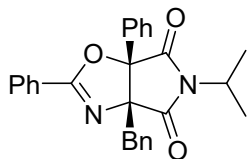

Colorless oil; 35.1 mg, 83% yield, >95:5 dr, 92% ee.  $[\alpha]_{436}^{25} = -6.8$  ( $c = 0.59$ , in  $\text{CH}_2\text{Cl}_2$ ).

Dissolved in MeOH for UPC<sup>2</sup>; UPC<sup>2</sup> (Daicel CHIRALPAK OJ-3,  $\text{CO}_2/\text{MeOH} = 95/5$ , flow rate = 1.5 mL/min,  $\lambda = 254$  nm) retention time: 2.4 min, 3.7 min. dr > 95:5 determined by <sup>1</sup>H NMR.

<sup>1</sup>H NMR (400 MHz, Chloroform-*d*)  $\delta = 8.10 - 8.08$  (m, 2H), 7.59 - 7.55 (m, 1H), 7.48 - 7.45 (m, 2H), 7.41 - 7.38 (m, 1H), 7.34 - 7.30 (m, 2H), 7.05 - 6.98 (m, 3H), 6.91 - 6.87 (m, 2H), 6.49 - 6.47 (m, 2H), 4.57 (m, 1H), 3.40 (d,  $J = 14.4$  Hz, 1H), 2.99 (d,  $J = 14.4$  Hz, 1H), 1.49 (dd,  $J = 6.8, 1.6$  Hz, 6H) ppm.

<sup>13</sup>C{<sup>1</sup>H} NMR (100 MHz, Chloroform-*d*)  $\delta = 175.4, 174.0, 163.8, 133.9, 132.7, 132.6, 130.4, 129.2, 129.1, 128.7, 127.5, 126.4, 126.2, 125.9, 90.1, 81.6, 45.2, 37.0, 19.6, 19.1$  ppm.

IR (neat):  $\nu(\text{cm}^{-1})$  3063, 3032, 2977, 1785, 1715, 1643, 1603, 1581, 1496, 1452, 1397, 1356, 1331, 1228, 1178, 1092, 1066, 1028, 985, 916, 873, 824, 780, 739, 697, 638, 505, 422.

HRMS (ESI-FT) calcd for  $\text{C}_{27}\text{H}_{25}\text{N}_2\text{O}_3^+$  ( $[\text{M}]+\text{H}^+$ ) = 425.1860, found 425.1861.

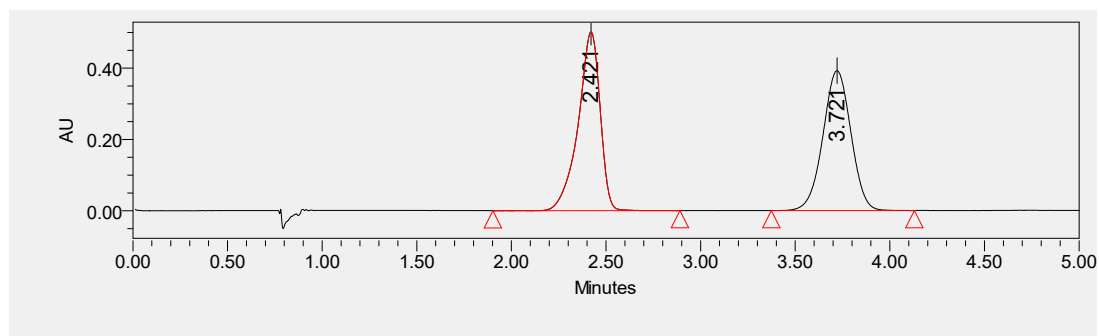

|   | Retention Time | % Area |
|---|----------------|--------|
| 1 | 2.421          | 50.06  |
| 2 | 3.721          | 49.94  |

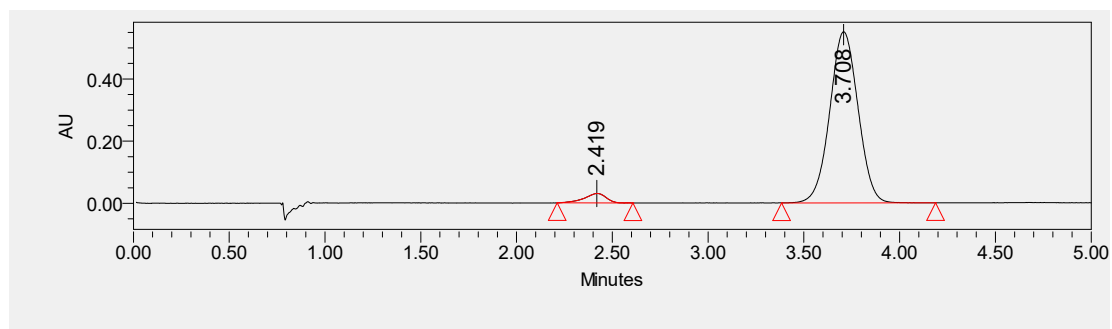

|   | Retention Time | % Area |
|---|----------------|--------|
| 1 | 2.419          | 4.05   |
| 2 | 3.708          | 95.95  |



**Methyl 2-benzamido-2-benzyl-4-nitro-3-phenylbutanoate (7)**

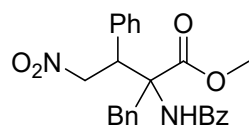

White solid, **M.p.** 74 – 76 °C.

**<sup>1</sup>H NMR** (400 MHz, Chloroform-*d*)  $\delta$  = 7.47 – 7.41 (m, 3H), 7.36 – 7.32 (m, 2H), 7.23 – 7.19 (m, 6H), 7.12 – 7.05 (m, 4H), 6.59 (s, 1H), 5.31 – 5.24 (m, 3H), 4.20 (d, *J* = 13.0 Hz, 1H), 3.89 (s, 3H), 3.37 (d, *J* = 13.0 Hz, 1H) ppm.

**<sup>13</sup>C{<sup>1</sup>H} NMR** (100 MHz, Chloroform-*d*)  $\delta$  = 171.4, 167.8, 135.7, 135.3, 135.1, 131.7, 129.7, 128.9, 128.8, 128.6, 128.6, 128.3, 127.5, 126.8, 68.8, 53.3, 46.8, 38.8 ppm.

**IR** (neat):  $\nu$ (cm<sup>-1</sup>) 3408, 3033, 2954, 1738, 1662, 1554, 1511, 1487, 1443, 1359, 1288, 1233, 1089, 958, 883, 838, 704, 614, 556.

**HRMS** (ESI-FT) calcd for C<sub>25</sub>H<sub>25</sub>N<sub>2</sub>O<sub>5</sub><sup>+</sup> ([M]<sup>+</sup>+H<sup>+</sup>) = 433.1758, found 433.1760.

**Methyl (Z)-6-(acetoxyimino)-4-benzyl-2,5-diphenyl-5,6-dihydro-4H-1,3-oxazine-4-carboxylate (8)**

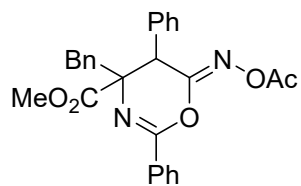

White solid, **M.p.** 97 – 99 °C.

**<sup>1</sup>H NMR** (400 MHz, Chloroform-*d*)  $\delta$  = 8.20 – 8.18 (m, 2H), 7.63 – 7.59 (m, 1H), 7.55 – 7.51 (m, 2H), 7.32 – 7.23 (m, 10H), 4.51 (s, 1H), 3.62 (s, 3H), 3.13 (d, *J* = 13.6 Hz, 1H), 2.67 (d, *J* = 13.6 Hz, 1H), 2.21 (s, 3H) ppm.

**<sup>13</sup>C{<sup>1</sup>H} NMR** (100 MHz, Chloroform-*d*)  $\delta$  = 171.0, 167.7, 154.2, 150.9, 135.6, 134.1, 132.6, 130.9, 129.3, 128.8, 128.7, 128.6, 128.4, 128.0, 127.0, 67.6, 53.2, 45.7, 42.2, 19.5 ppm.

**IR** (neat):  $\nu$ (cm<sup>-1</sup>) 3032, 2952, 1777, 1739, 1669, 1494, 1448, 1367, 1244, 1187, 1126, 1094, 1046, 1000, 963, 919, 830, 750, 699, 540.

**HRMS** (ESI-FT) calcd for C<sub>27</sub>H<sub>25</sub>N<sub>2</sub>O<sub>5</sub><sup>+</sup> ([M]<sup>+</sup>H<sup>+</sup>) = 457.1758, found 457.1763.

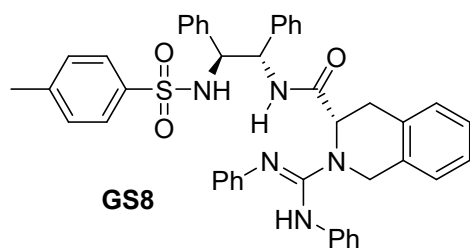

White solid, **M.p.** 107 – 109 °C;  $[\alpha]_D^{25} = -146.6$  ( $c = 0.69$ , in  $\text{CH}_2\text{Cl}_2$ ).

**$^1\text{H}$  NMR** (400 MHz, Chloroform-*d*)  $\delta = 8.82$  (d,  $J = 7.6$  Hz, 1H), 7.47 – 7.45 (m, 2H), 7.24 – 7.22 (m, 3H), 7.19 – 7.12 (m, 6H), 7.07 – 7.00 (m, 5H), 6.97 – 6.94 (m, 5H), 6.84 – 6.83 (m, 6H), 6.79 – 6.77 (m, 1H), 6.43 (s, 1H), 5.76 (s, 1H), 5.14 – 5.10 (m, 1H), 4.92 – 4.91 (m, 1H), 4.65 (d,  $J = 9.6$  Hz, 1H), 4.40 (d,  $J = 16.4$  Hz, 1H), 4.14 (d,  $J = 16.4$  Hz, 1H), 3.40 – 3.36 (m, 1H), 3.09 – 3.03 (m, 1H), 2.25 (s, 3H) ppm.

**$^{13}\text{C}\{^1\text{H}\}$  NMR** (100 MHz, Chloroform-*d*)  $\delta = 173.6, 151.8, 142.7, 138.5, 138.3, 137.8, 133.3, 131.7, 129.5, 129.3, 128.7, 128.1, 128.0, 127.8, 127.6, 127.4, 127.0, 126.8, 126.1, 126.0, 123.0, 64.9, 59.0, 55.4, 46.3, 29.4, 21.5$  ppm.

**IR** (neat):  $\nu(\text{cm}^{-1})$  3030, 1664, 1619, 1580, 1496, 1453, 1403, 1313, 1232, 1157, 1090, 1027, 938, 814, 751, 698, 669, 563.

**HRMS** (ESI-FT) calcd for  $\text{C}_{44}\text{H}_{42}\text{N}_5\text{O}_3\text{S}^+$  ( $[\text{M}] + \text{H}^+$ ) = 720.3003, found 720.3004.

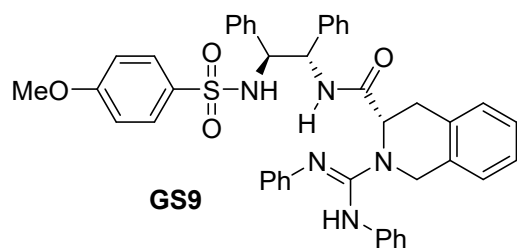

White solid, **M.p.** 116 – 118 °C;  $[\alpha]_{\text{D}}^{25} = -126.1$  ( $c = 0.69$ , in  $\text{CH}_2\text{Cl}_2$ ).

**$^1\text{H}$  NMR** (400 MHz, Chloroform-*d*)  $\delta = 8.79$  (d,  $J = 7.2$  Hz, 1H), 7.49 – 7.47 (m, 2H), 7.13 – 7.11 (m, 9H), 7.07 – 6.94 (m, 8H), 6.85 – 6.78 (m, 7H), 6.69 – 6.66 (m, 2H), 6.41 (s, 1H), 5.79 (s, 1H), 5.14 – 5.10 (m, 1H), 4.98 – 4.97 (m, 1H), 4.64 (d,  $J = 9.6$  Hz, 1H), 4.40 (d,  $J = 16.4$  Hz, 1H), 4.16 (d,  $J = 16.4$  Hz, 1H), 3.69 (s, 3H), 3.40 – 3.36 (m, 1H), 3.09 – 3.04 (m, 1H) ppm.

**$^{13}\text{C}\{^1\text{H}\}$  NMR** (100 MHz, Chloroform-*d*)  $\delta = 173.5, 162.4, 151.8, 138.4, 137.9, 133.3, 133.0, 131.8, 129.5, 128.9, 128.7, 128.1, 127.9, 127.8, 127.6, 127.5, 127.0, 126.1, 126.0, 123.0, 113.8, 64.8, 59.0, 55.6, 55.5, 46.4, 29.4$  ppm.

**IR** (neat):  $\nu(\text{cm}^{-1})$  3030, 1664, 1618, 1580, 1497, 1455, 1408, 1308, 1258, 1153, 1092, 1027, 937, 833, 751, 698, 565.

**HRMS** (ESI-FT) calcd for  $\text{C}_{44}\text{H}_{42}\text{N}_5\text{O}_4\text{S}^+$  ( $[\text{M}] + \text{H}^+$ ) = 736.2952, found 736.2951.

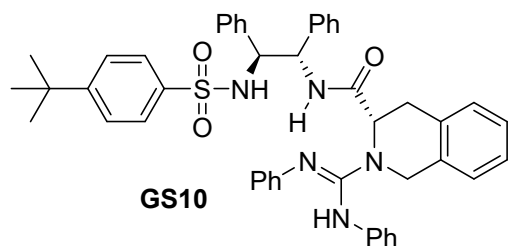

**GS10**

White solid, **M.p.** 127 – 129 °C;  $[\alpha]_{\text{D}}^{25} = -150.3$  ( $c = 0.71$ , in  $\text{CH}_2\text{Cl}_2$ ).

**<sup>1</sup>H NMR** (400 MHz, Chloroform-*d*)  $\delta = 8.82$  (d,  $J = 7.6$  Hz, 1H), 7.48 – 7.45 (m, 2H), 7.23 – 7.11 (m, 11H), 7.07 – 7.03 (m, 2H), 6.99 – 6.89 (m, 6H), 6.85 – 6.79 (m, 7H), 6.42 (s, 1H), 5.79 (s, 1H), 5.16 – 5.11 (m, 1H), 4.89 – 4.88 (m, 1H), 4.68 (d,  $J = 9.6$  Hz, 1H), 4.41 (d,  $J = 16.4$  Hz, 1H), 4.16 (d,  $J = 16.4$  Hz, 1H), 3.38 – 3.34 (m, 1H), 3.07 – 3.01 (m, 1H), 1.23 (s, 9H).

**<sup>13</sup>C{<sup>1</sup>H} NMR** (100 MHz, Chloroform-*d*)  $\delta = 173.5, 155.6, 151.8, 138.3, 138.2, 137.9, 133.3, 131.8, 129.5, 128.7, 128.1, 128.0, 127.8, 127.5, 127.4, 127.0, 126.7, 126.1, 126.0, 125.6, 123.0, 65.0, 58.9, 55.3, 46.4, 35.0, 31.1, 29.5$  ppm.

**IR** (neat):  $\nu(\text{cm}^{-1})$  3031, 2963, 1664, 1619, 1580, 1496, 1454, 1399, 1321, 1233, 1161, 1113, 1086, 1027, 932, 836, 750, 697, 632, 574.

**HRMS** (ESI-FT) calcd for  $\text{C}_{47}\text{H}_{48}\text{N}_5\text{O}_3\text{S}^+$  ( $[\text{M}+\text{H}^+]$ ) = 762.3472, found 762.3467.

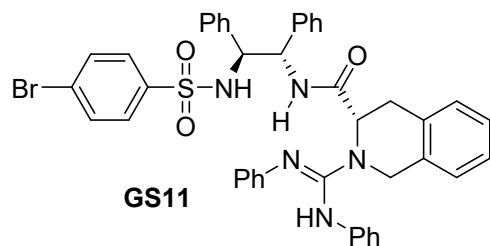

**GS11**

White solid, **M.p.** 129 – 131 °C;  $[\alpha]_D^{25} = -157.7$  ( $c = 0.72$ , in CH<sub>2</sub>Cl<sub>2</sub>).

**<sup>1</sup>H NMR** (400 MHz, Chloroform-*d*)  $\delta = 9.05$  (d,  $J = 7.6$  Hz, 1H), 7.35 – 7.27 (m, 5H), 7.24 – 7.13 (m, 8H), 7.05 – 6.91 (m, 8H), 6.86 – 6.78 (m, 7H), 5.75 (s, 1H), 5.16 – 5.11 (m, 1H), 4.93 – 4.92 (m, 1H), 4.71 (d,  $J = 10.0$  Hz, 1H), 4.38 (d,  $J = 16.4$  Hz, 1H), 4.12 (d,  $J = 16.4$  Hz, 1H), 3.40 – 3.36 (m, 1H), 3.10 – 3.05 (m, 1H) ppm.

**<sup>13</sup>C{<sup>1</sup>H} NMR** (100 MHz, Chloroform-*d*)  $\delta = 173.9, 152.0, 140.5, 138.0, 137.6, 133.2, 131.8, 131.6, 129.6, 128.8, 128.7, 128.3, 128.2, 128.1, 127.8, 127.6, 127.0, 126.7, 126.1, 126.0, 123.2, 65.3, 59.1, 55.3, 46.4, 29.3$  ppm.

**IR** (neat):  $\nu(\text{cm}^{-1})$  3030, 1662, 1618, 1578, 1496, 1453, 1392, 1330, 1234, 1159, 1089, 1068, 1010, 935, 822, 742, 698, 605, 541, 421.

**HRMS** (ESI-FT) calcd for C<sub>43</sub>H<sub>39</sub><sup>78.9183</sup>BrN<sub>5</sub>O<sub>3</sub>S<sup>+</sup> ( $[\text{M}]+\text{H}^+$ ) = 784.1951, found 784.1943, C<sub>43</sub>H<sub>39</sub><sup>80.9163</sup>BrN<sub>5</sub>O<sub>3</sub>S<sup>+</sup> ( $[\text{M}]+\text{H}^+$ ) = 786.1931, found 786.1933.

## 9. Substrate scope limitation

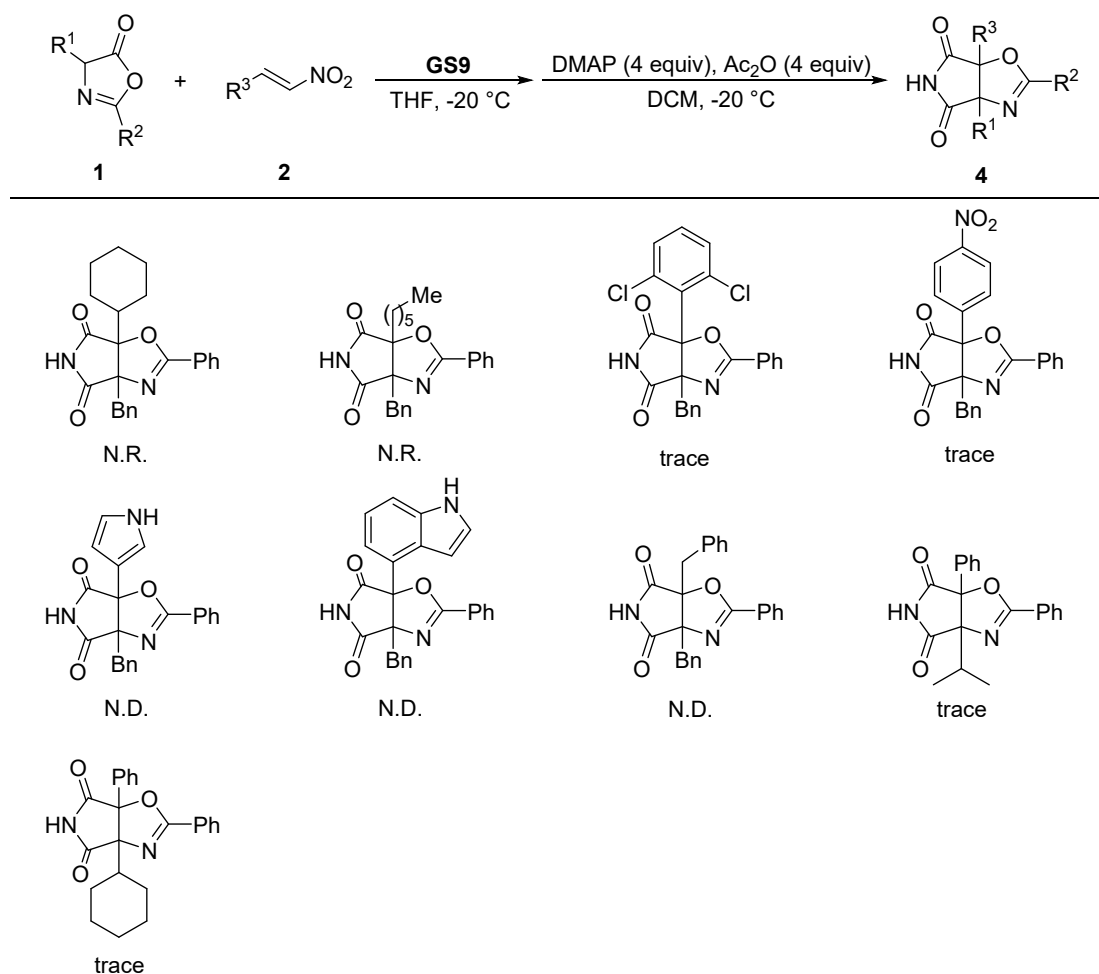

<sup>a</sup>Unless otherwise noted, all reactions were carried out with **1** (0.10 mmol), **2** (0.10 mmol), and **GS9** (10 mol%) in THF (1.0 mL) at  $-20\text{ }^{\circ}\text{C}$ . <sup>b</sup> N.R. = no reaction, N.D. = no detection.

Nitroolefins derived from heptaldehyde and cyclohexanecarboxaldehyde could not react with azlactones under the standard conditions. Dichloro-substituted or nitro-substituted nitroolefins were difficult to undergo Nef-type reactions due to the strong electron-withdrawing nature of the substituent group. Nitroolefins derived from pyrrole-3-carboxaldehyde and indole-4-carboxaldehyde could not give the desired C4 adduct under the standard conditions. Azlactones derived from valine and Cyclohexylglycine failed to give the Michael addition product.

## 10. References

- (1) (a) Dong, S. X.; Liu, X. H.; Chen, X. H.; Mei, F.; Zhang, Y. L.; Gao, B.; Lin, L. L.; Feng, X. M. *J. Am. Chem. Soc.* **2010**, *132*, 10650–10651. (b) Teegardina, K. A.; Weaver, J. D. *Chem. Commun.* **2017**, *53*, 4771–4774.
- (2) (a) Zheng, C. G.; Huang, S.; Liu, Y.; Jiang, C.; Zhang, W.; Fang, G.; Hong, J. Q. *Org. Lett.* **2020**, *22*, 4868–4872. (b) Kyle, A. F.; Jakubec, P.; Cockfield, D. M.; Cleator, E.; Skidmore, J.; Dixon, D. J. *Chem. Commun.* **2011**, *47*, 10037–10039. (c) Gao, S. H.; Tu, Y. Q.; Hu, X. D.; Wang, S. H.; Hua, R. B.; Jiang, Y. J.; Zhao, Y. M.; Fan, X. H.; Zhang, S. Y. *Org. Lett.* **2006**, *8*, 2373–2376. (d) Betke, T.; Rommelmann, P.; Oike, K.; Asano, Y.; Gröger, H. *Angew. Chem. Int. Ed.* **2017**, *56*, 12361–12366. (e) Dhakal, R. C.; Dieter, R. K. *Org. Lett.* **2014**, *16*, 1362–1365.
- (3) (a) Yu, Z. P.; Liu, X. H.; Zhou, L.; Lin, L. L.; Feng, X. M. *Angew. Chem. Int. Ed.* **2009**, *48*, 5195–5198. (b) Dong, S. X.; Liu, X. H.; Zhang, Y. L.; Lin, L. L.; Feng, X. M. *Org. Lett.* **2011**, *13*, 5060–5063.





GS9

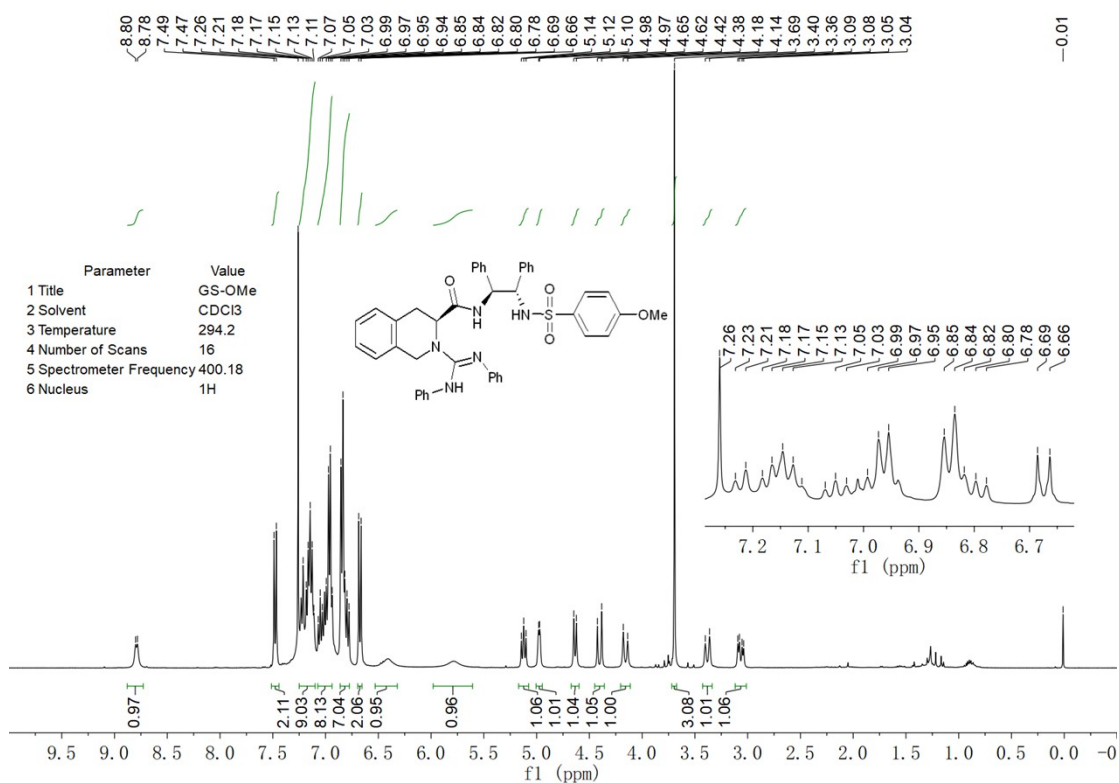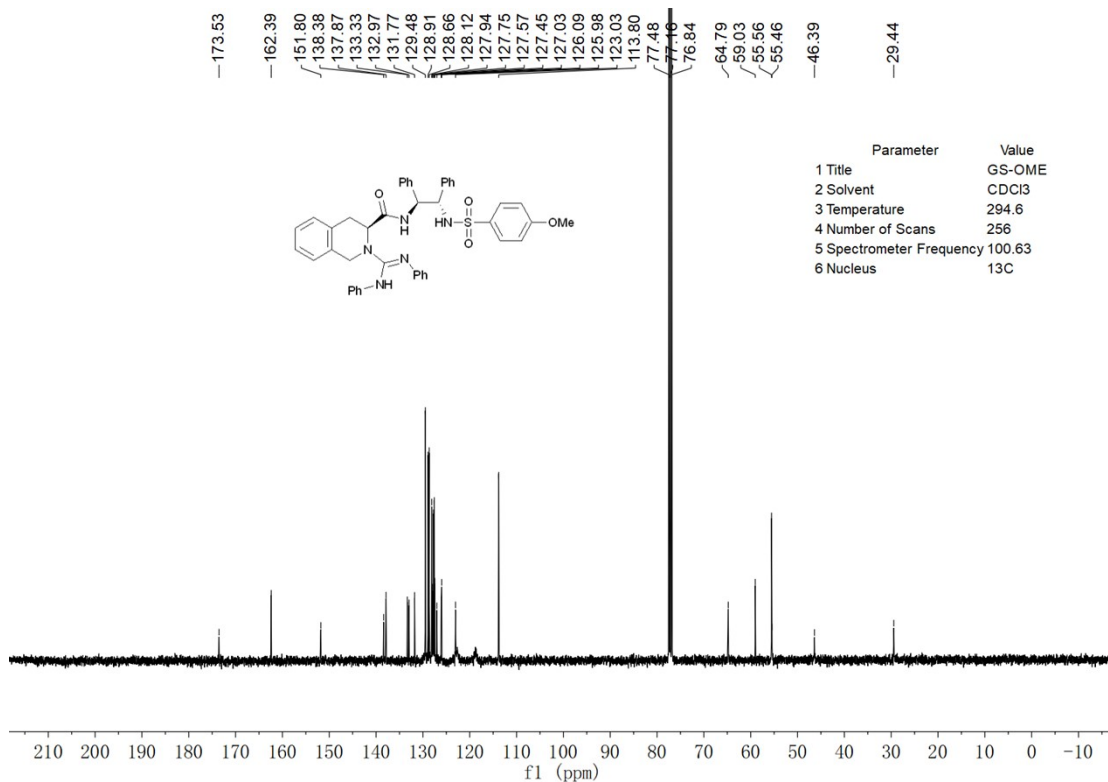

GS10

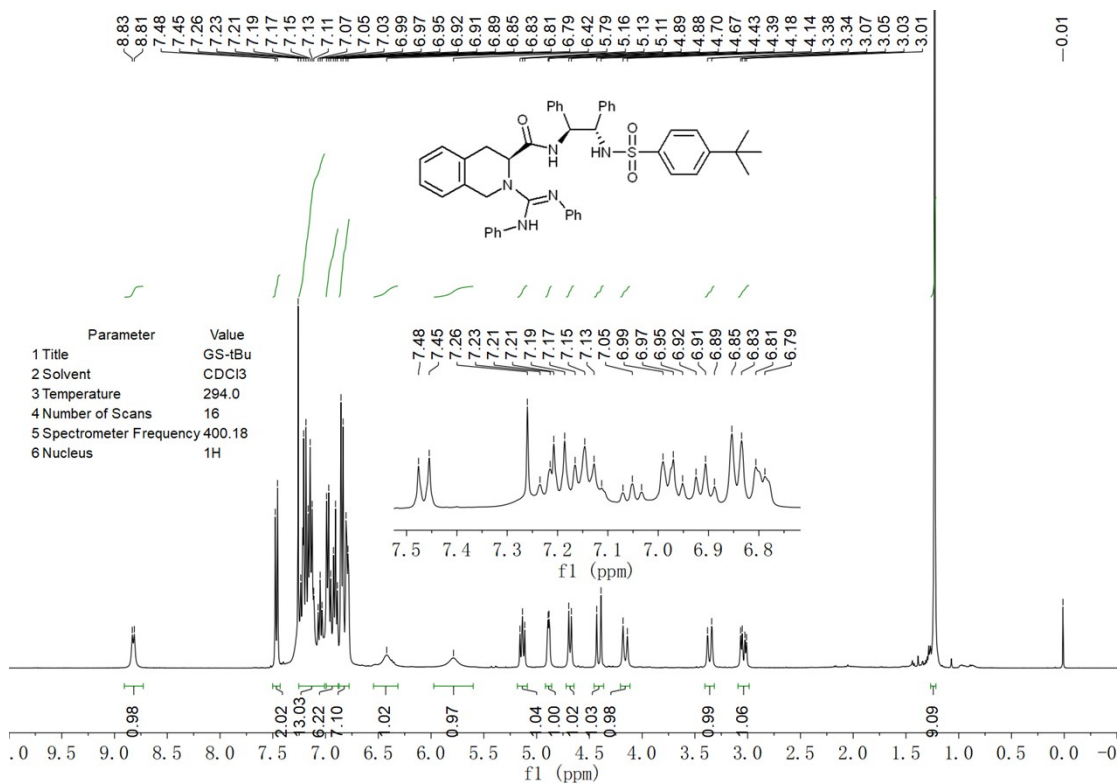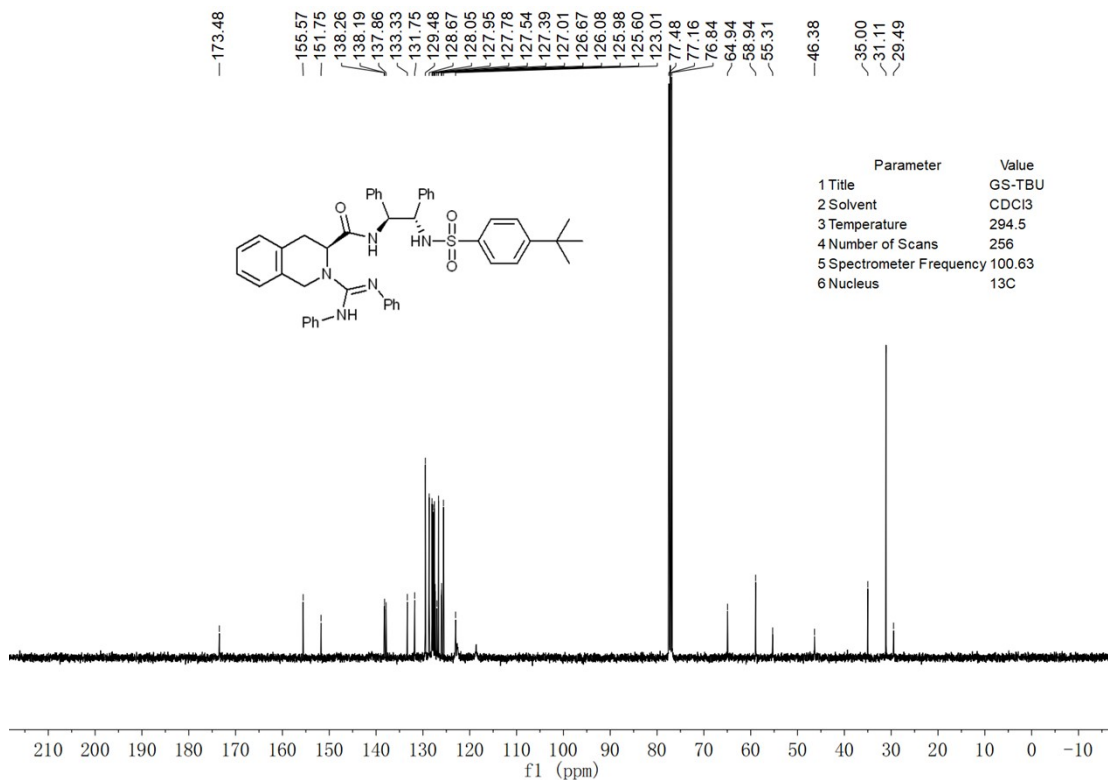

GS11

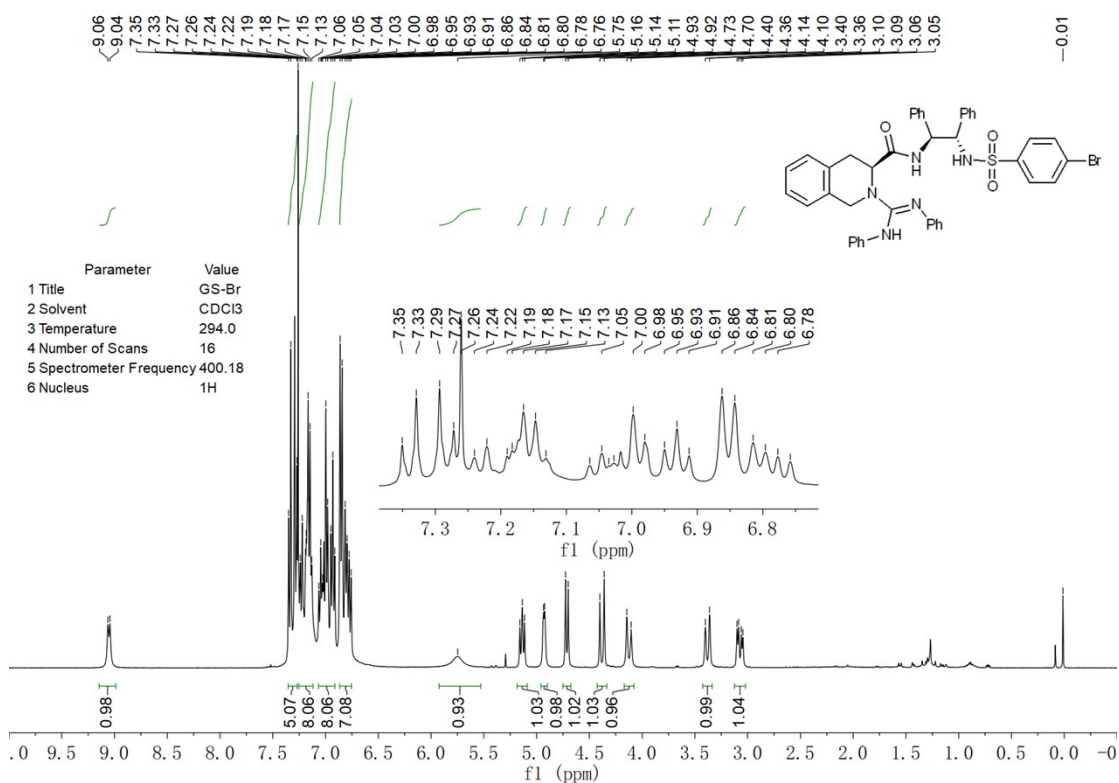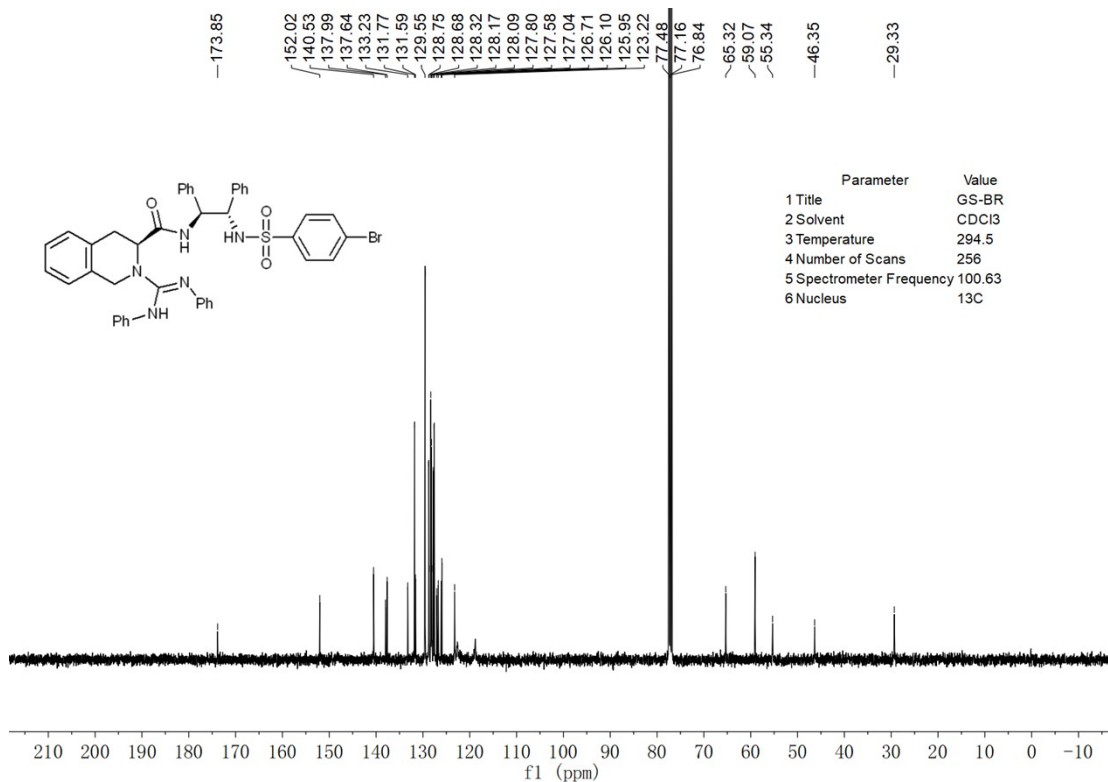

3aa

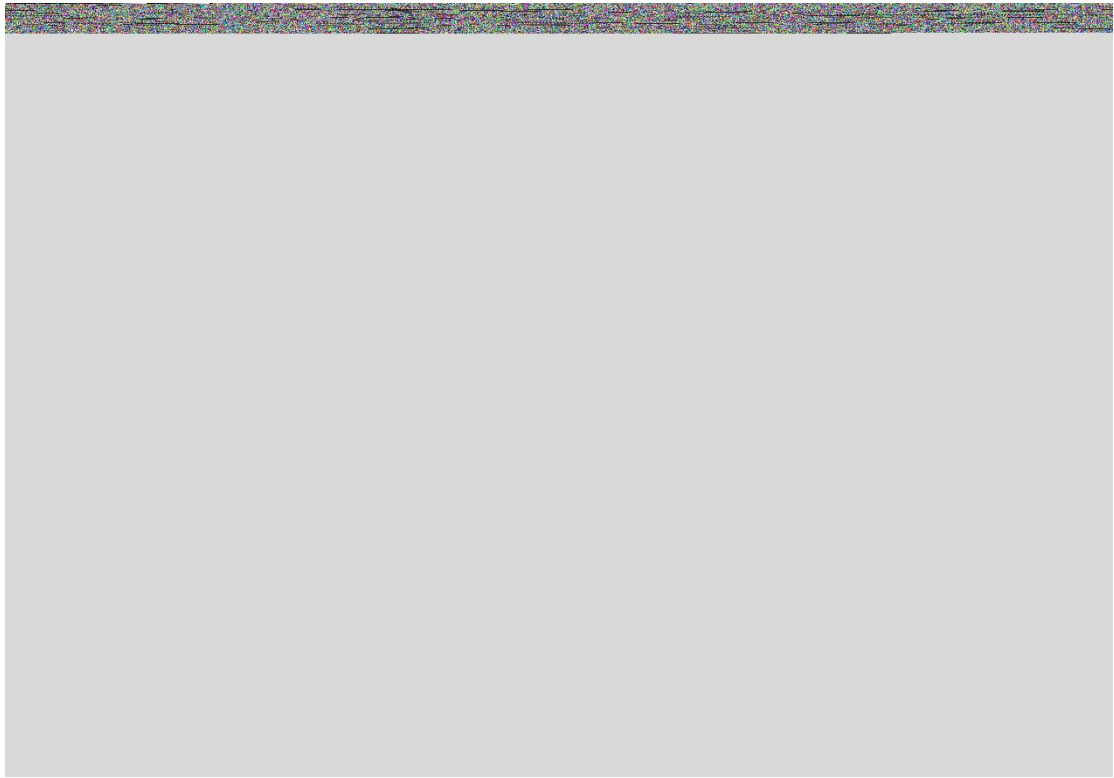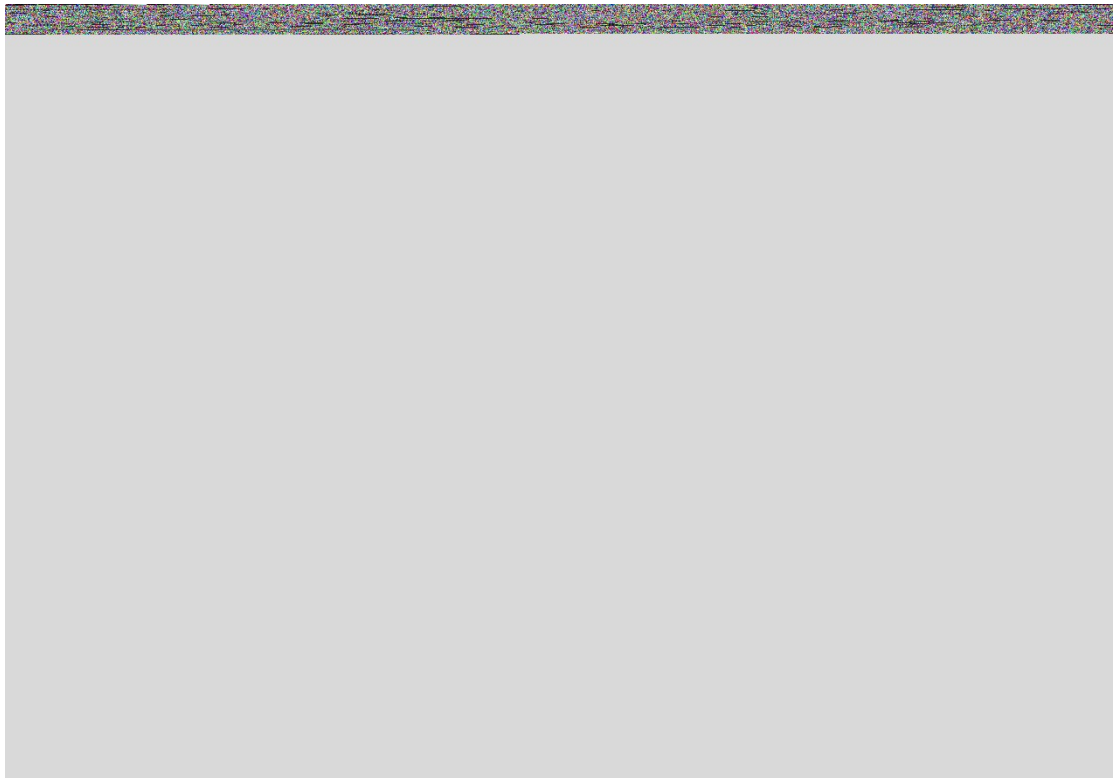

4aa

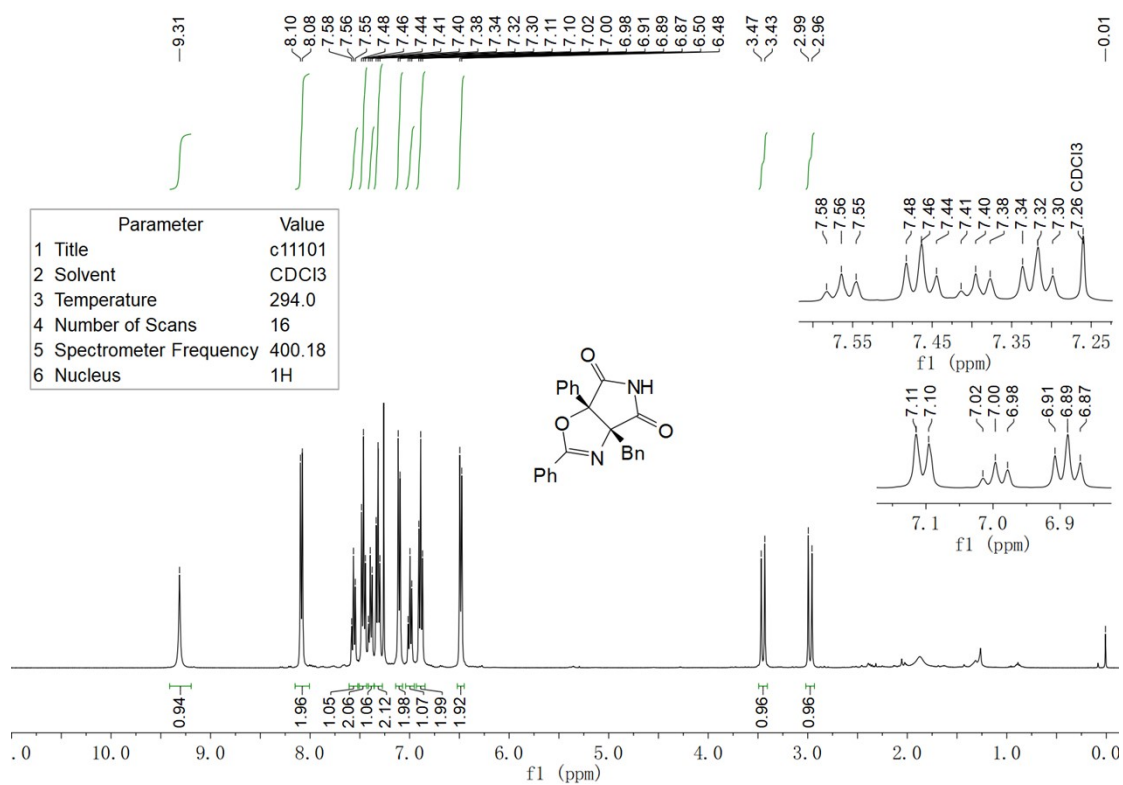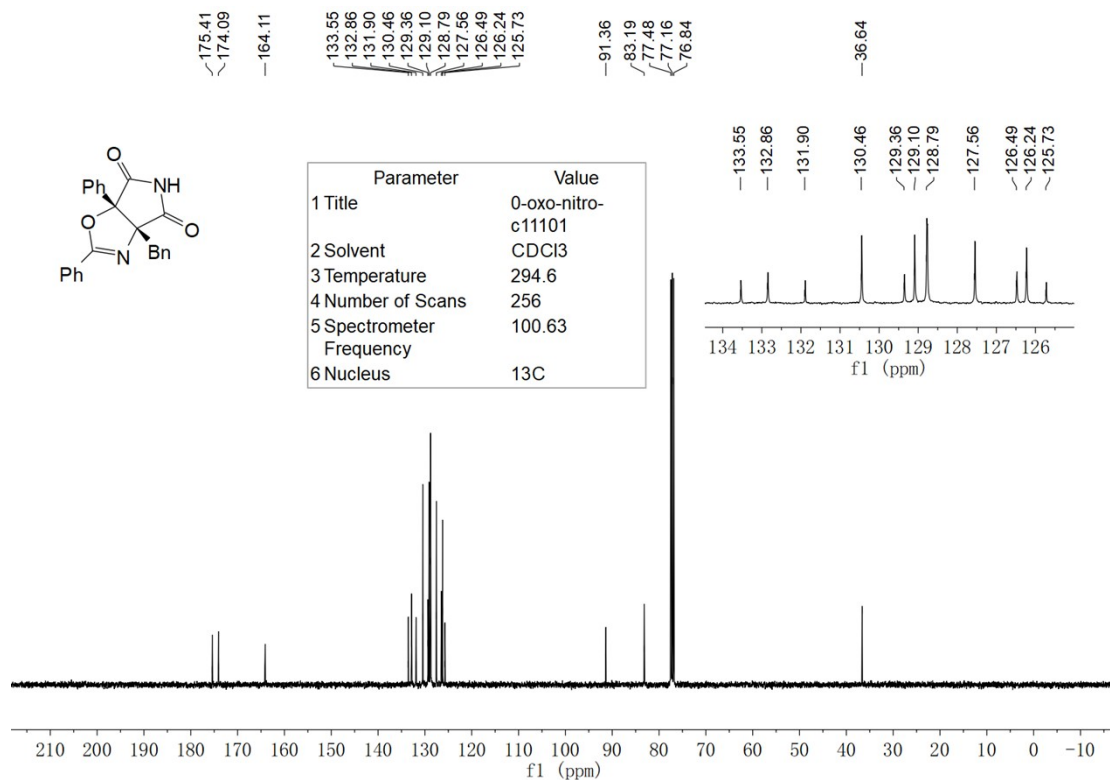

4ab

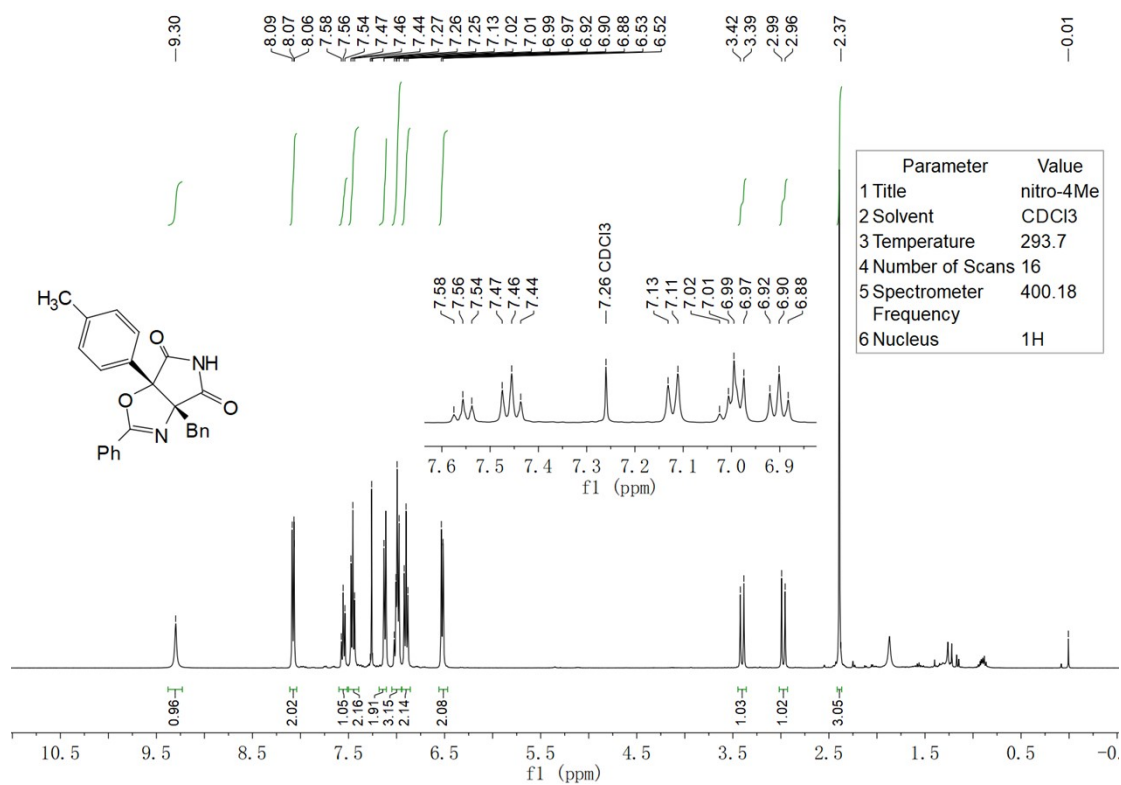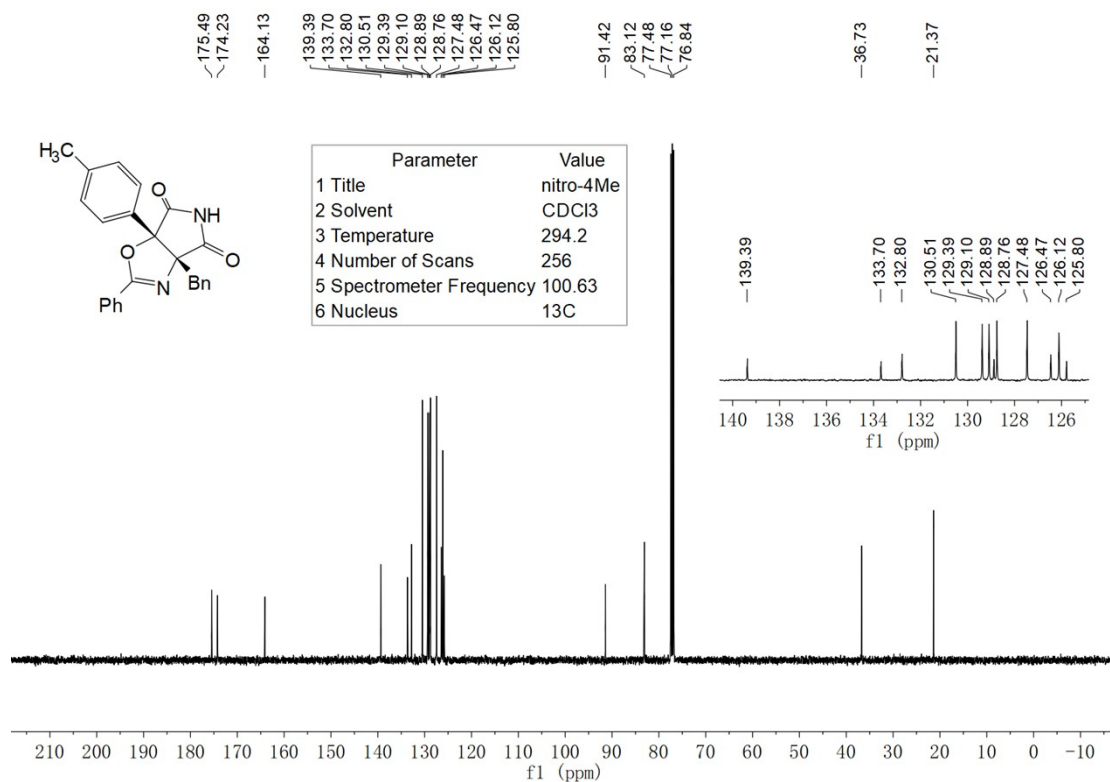







**4ad**

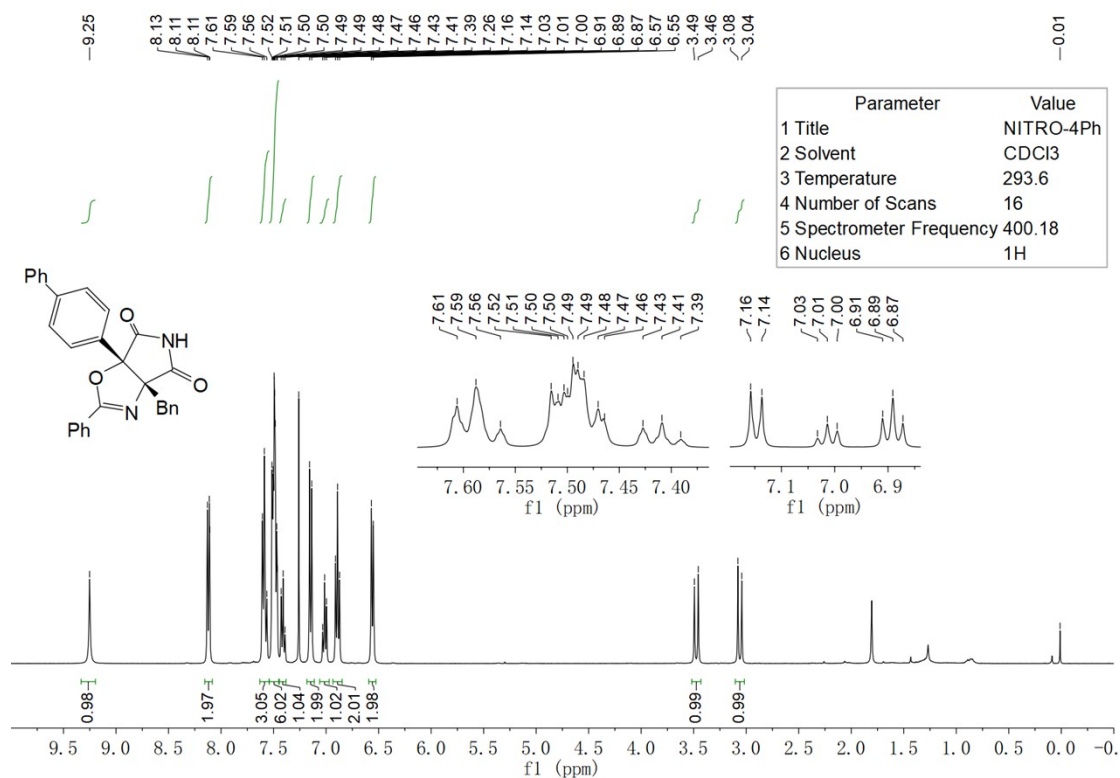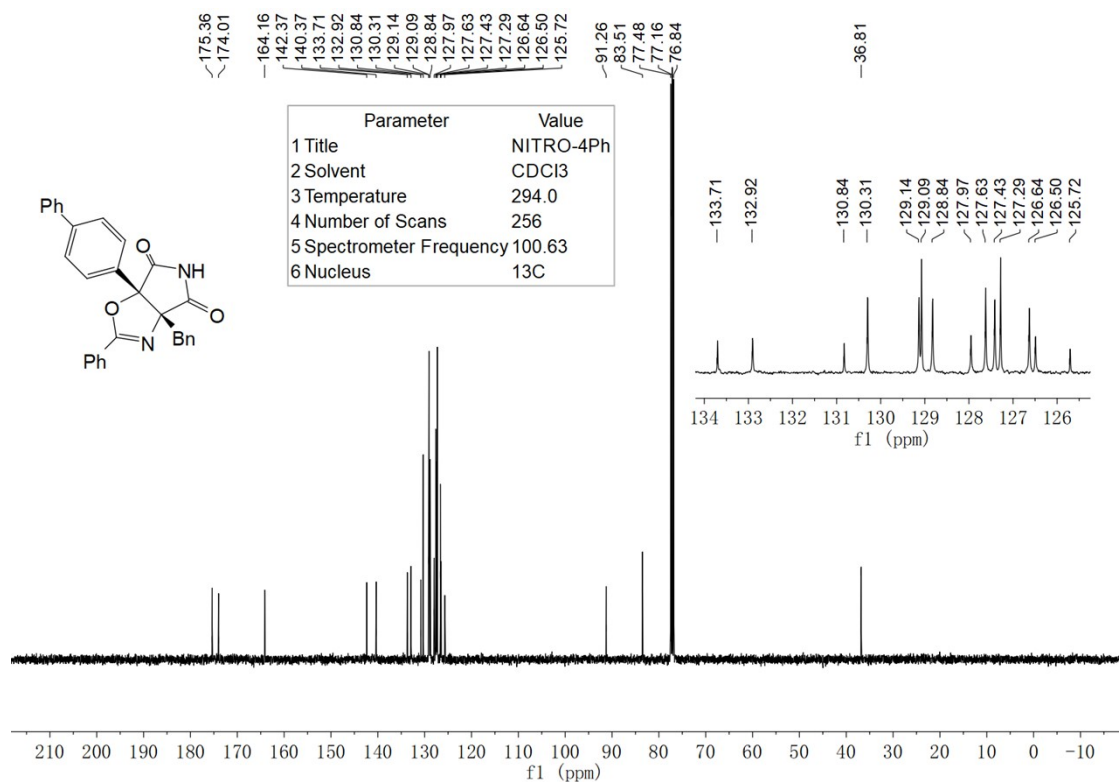

4ae

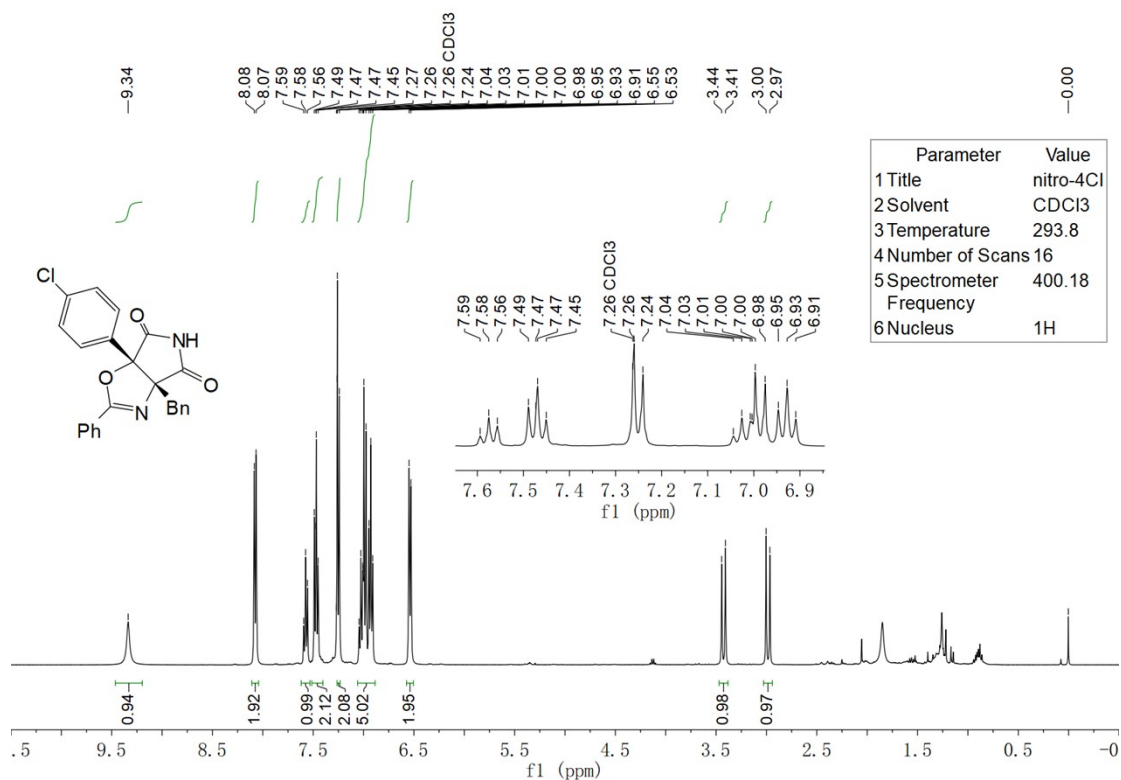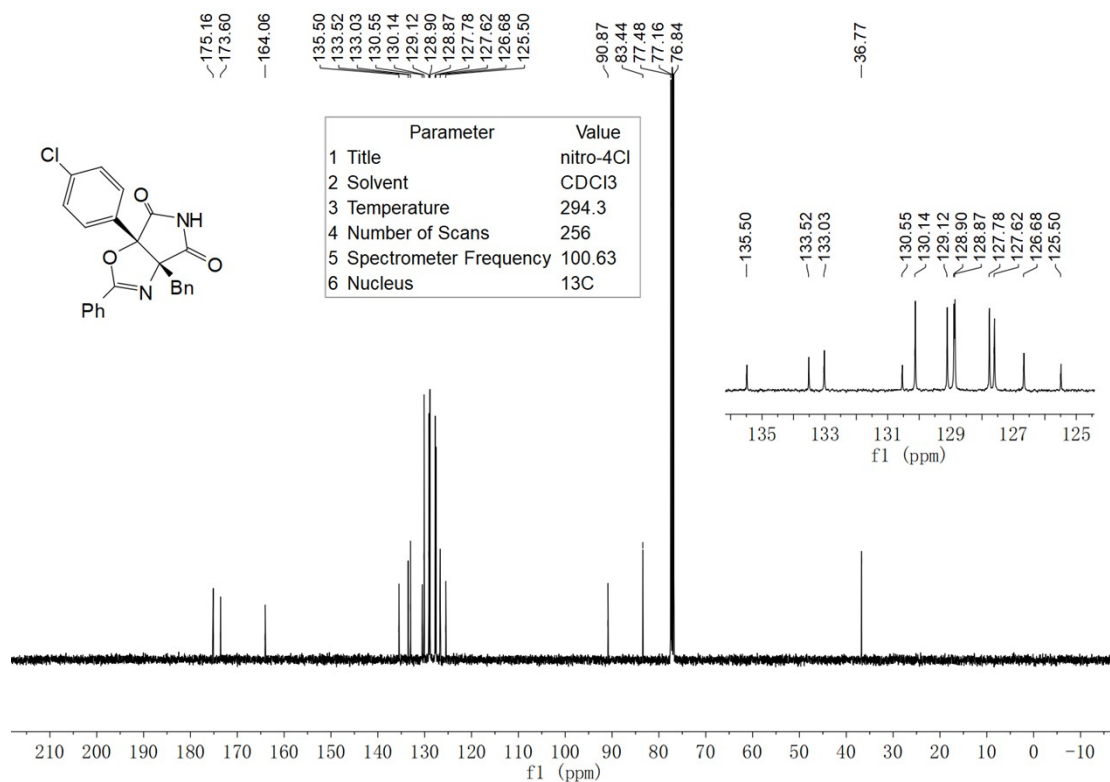

4af

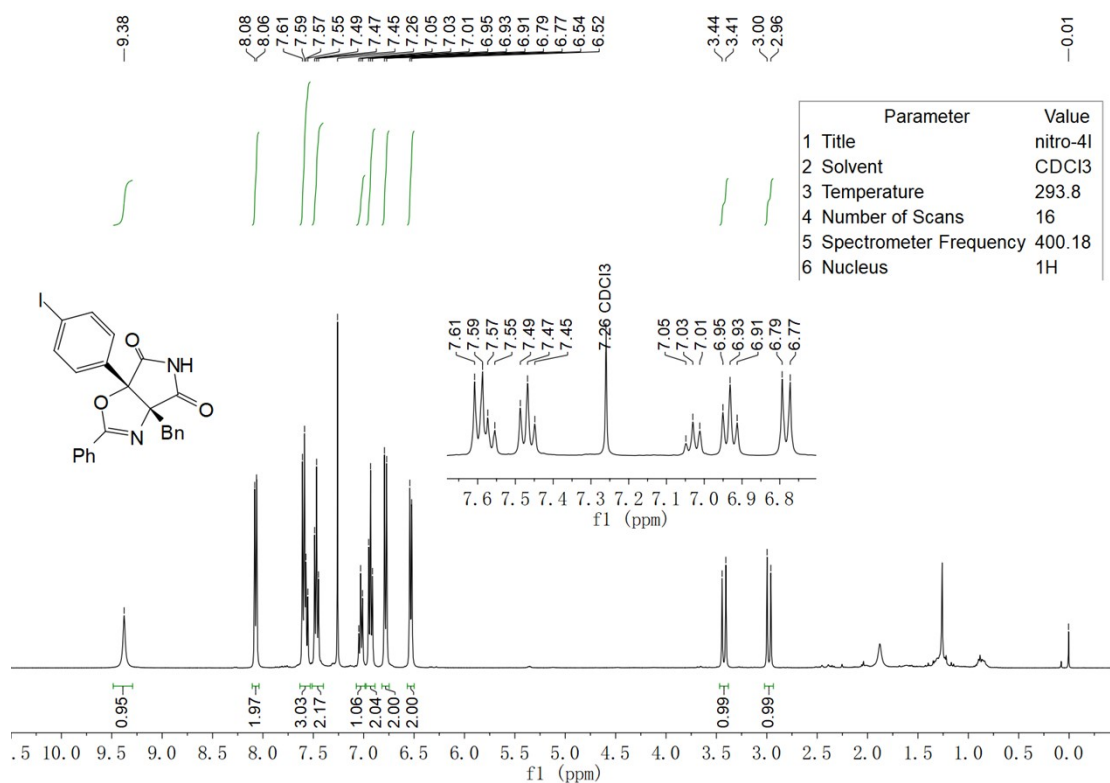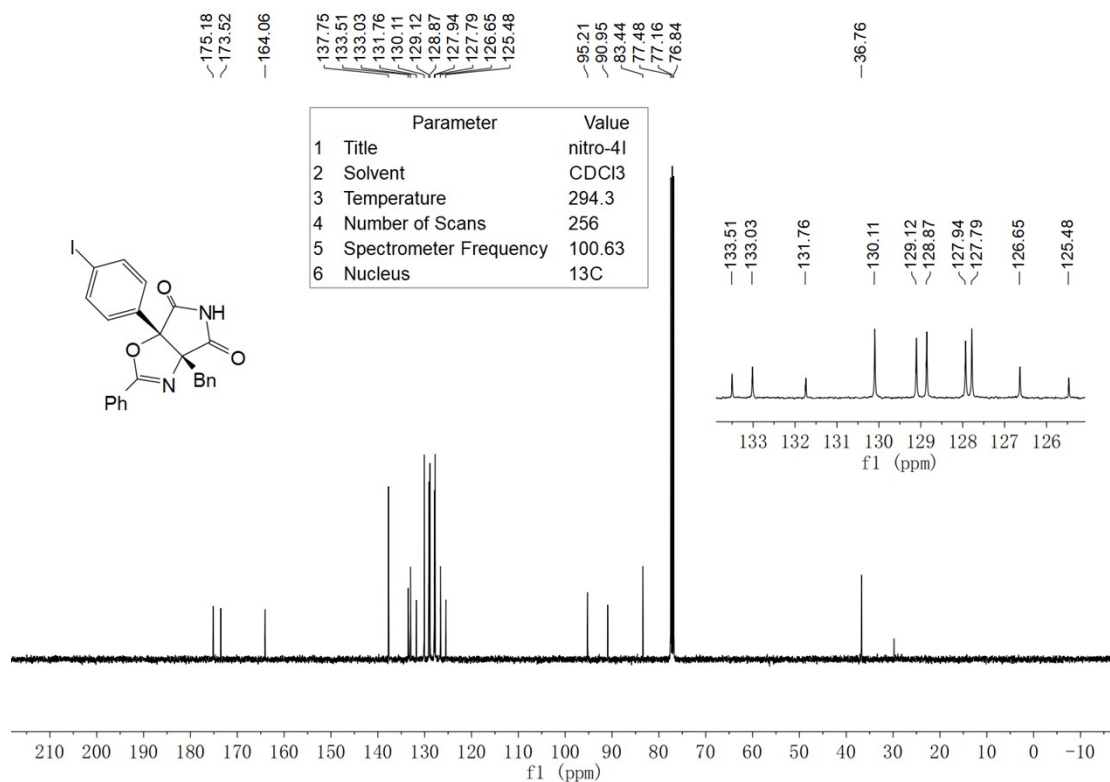

4ag

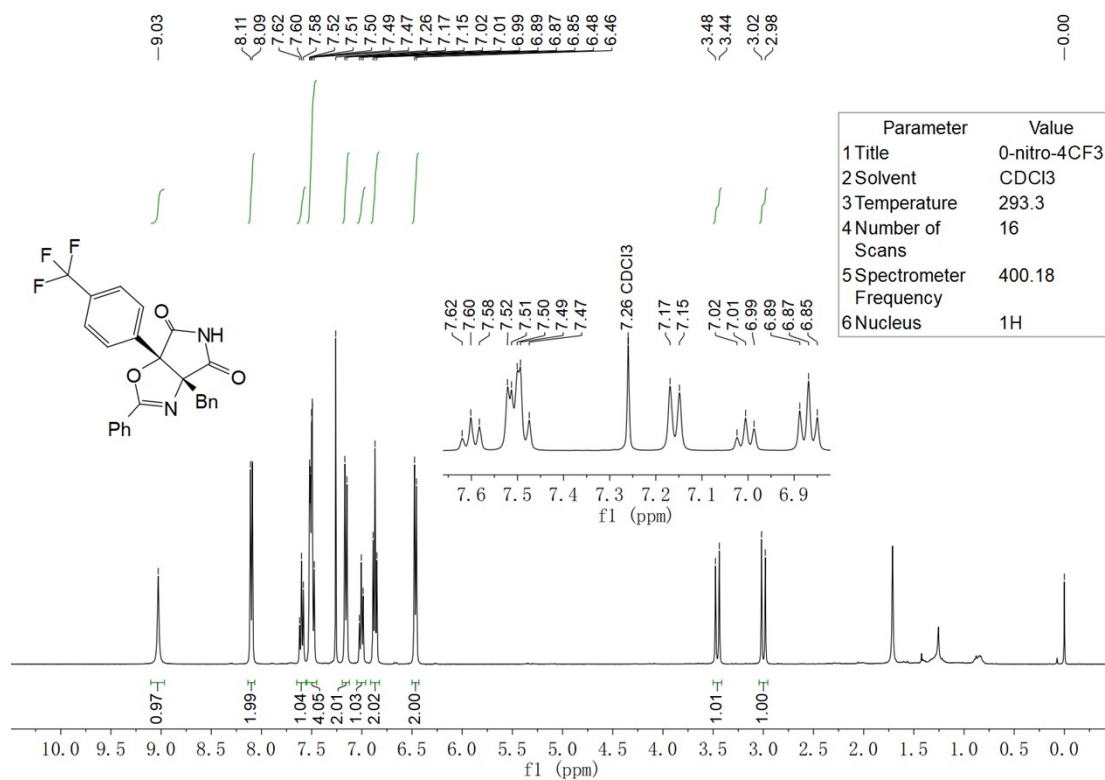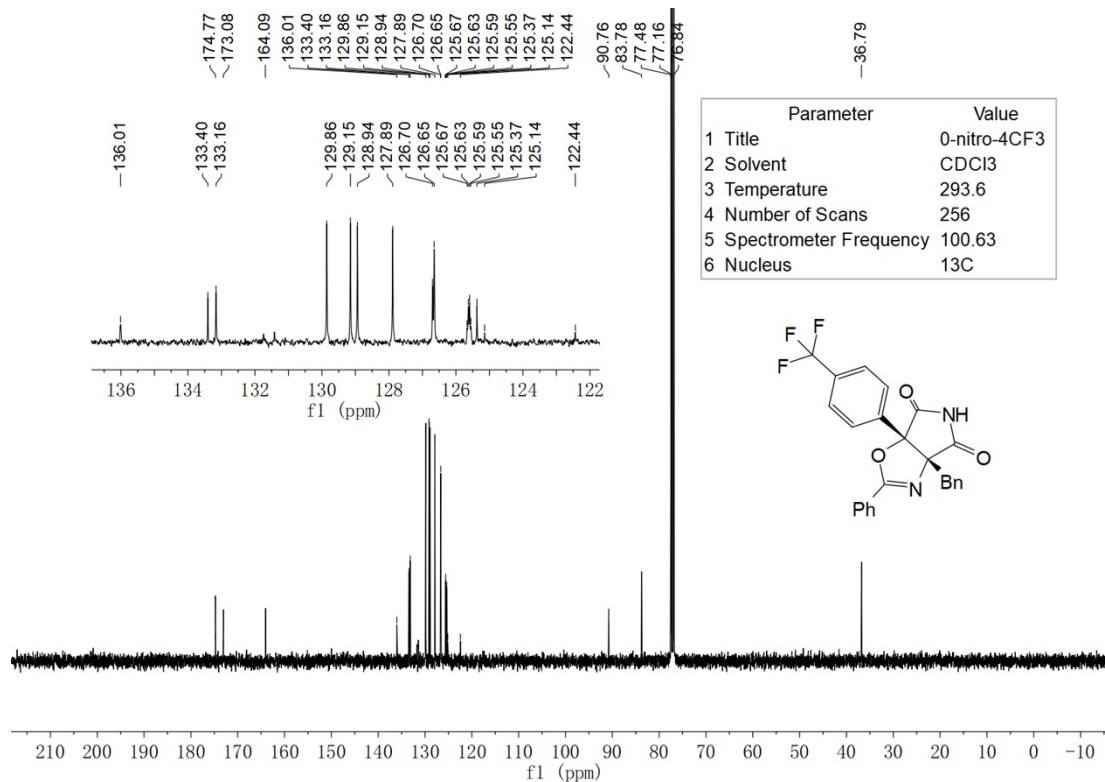

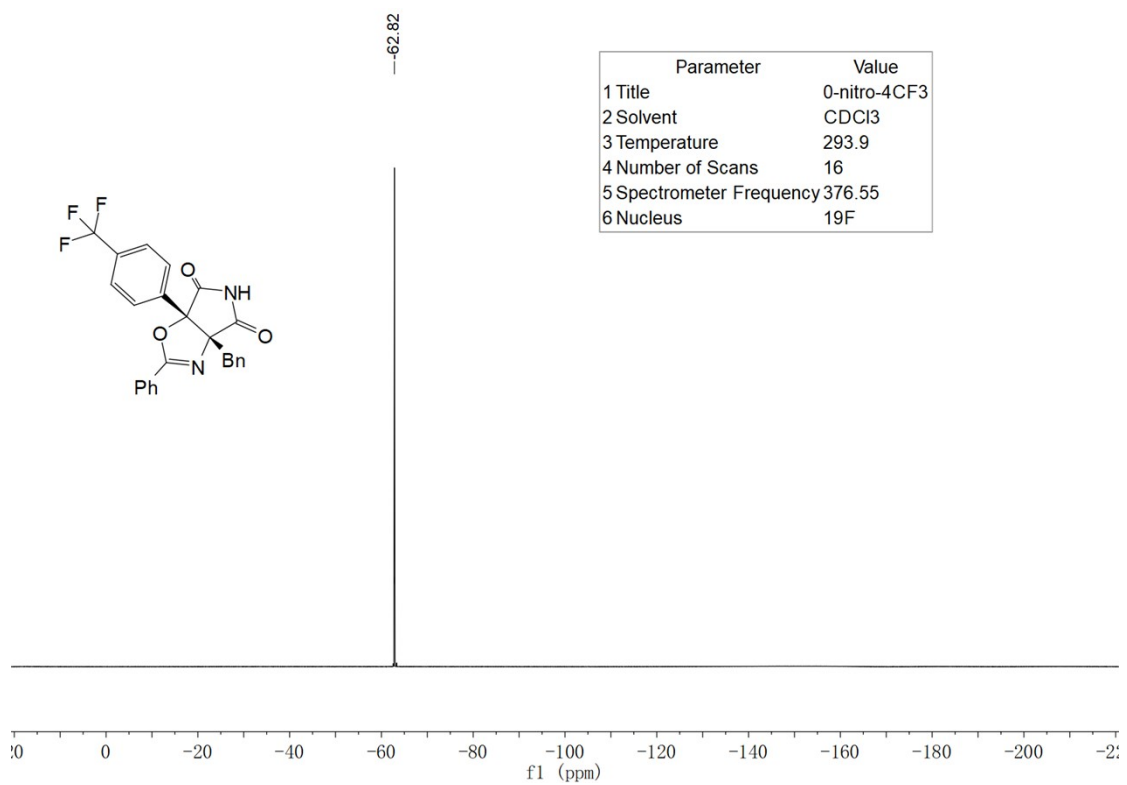

4ah

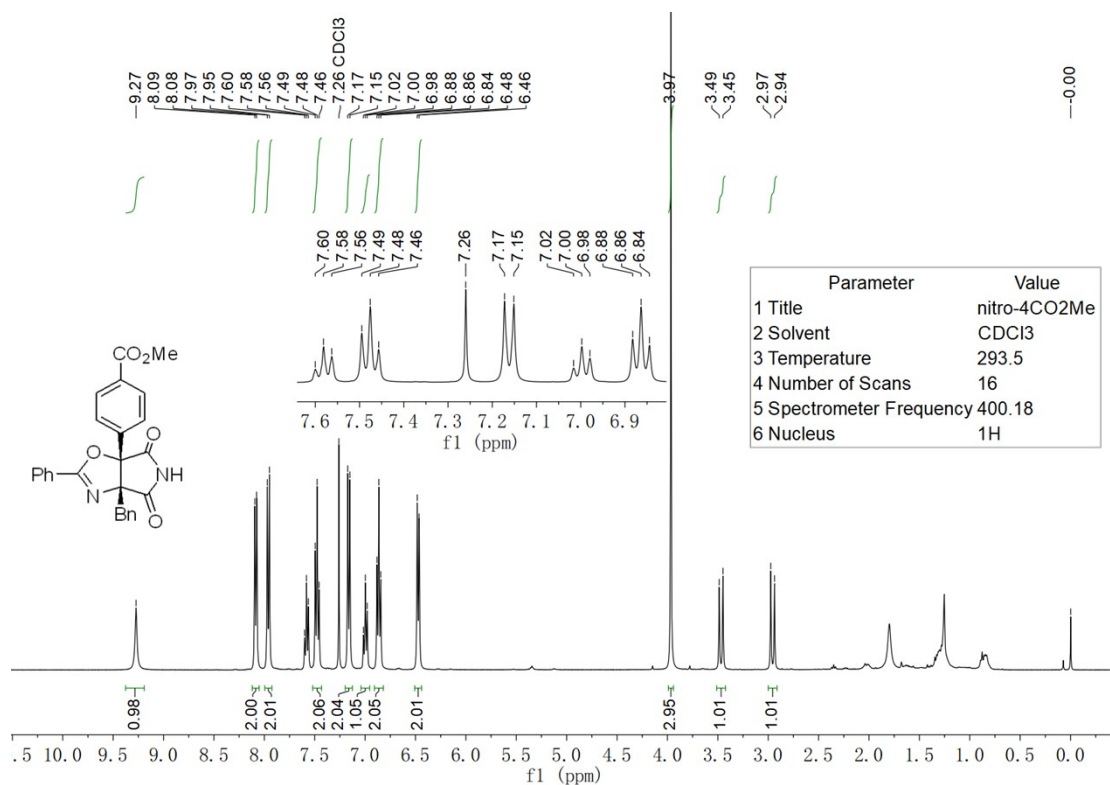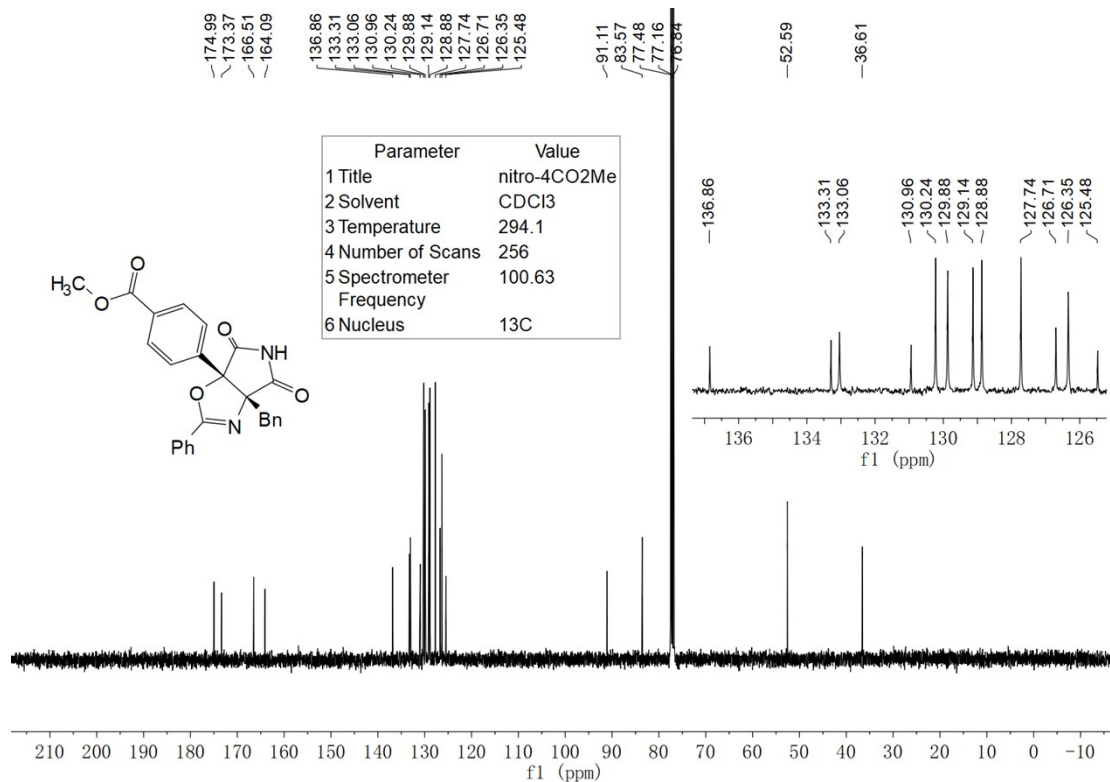



4ai

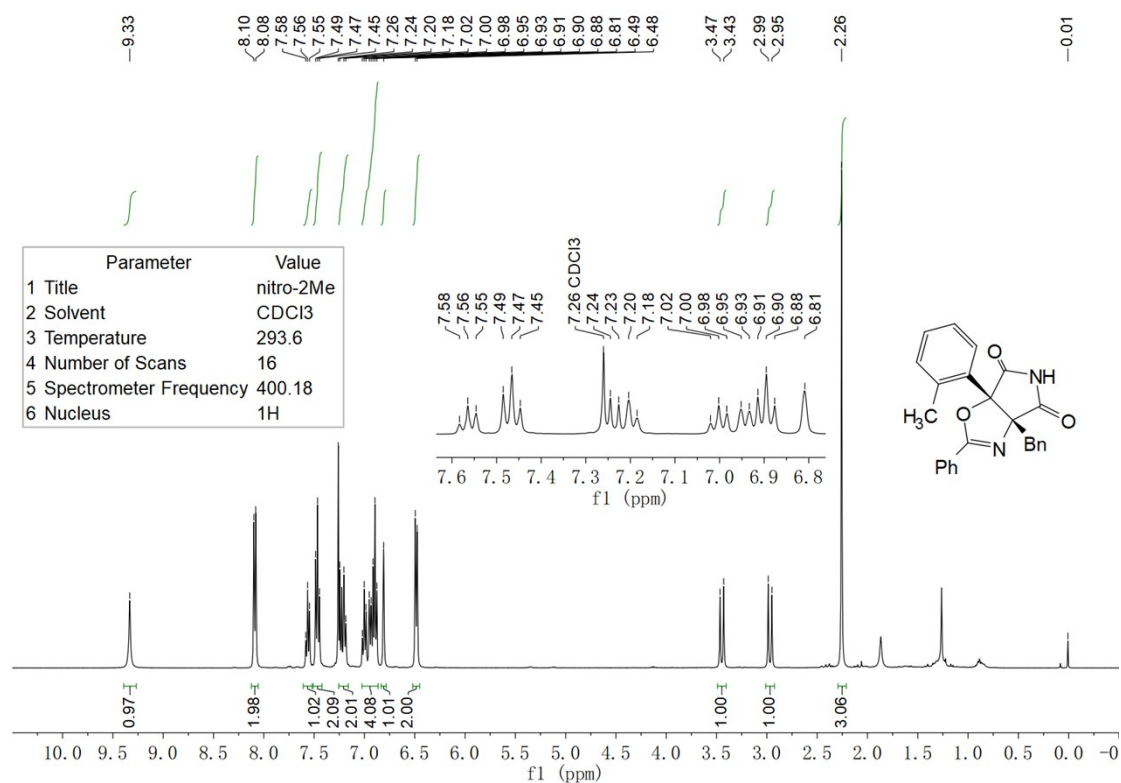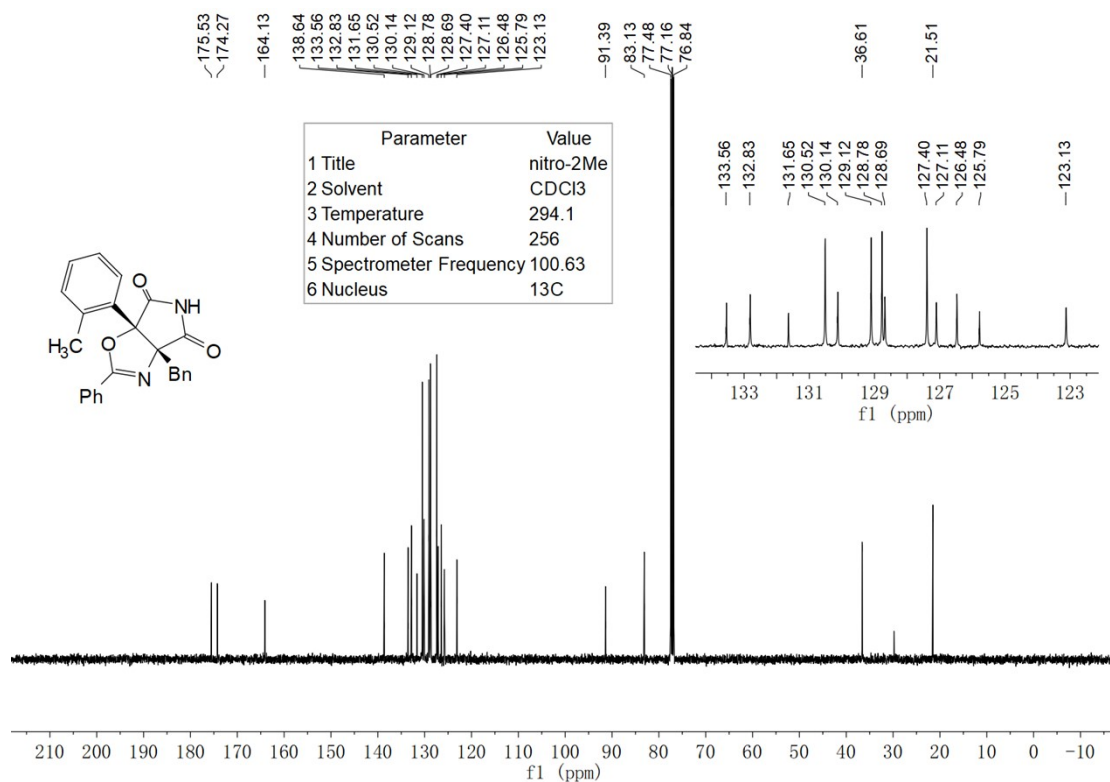

4aj

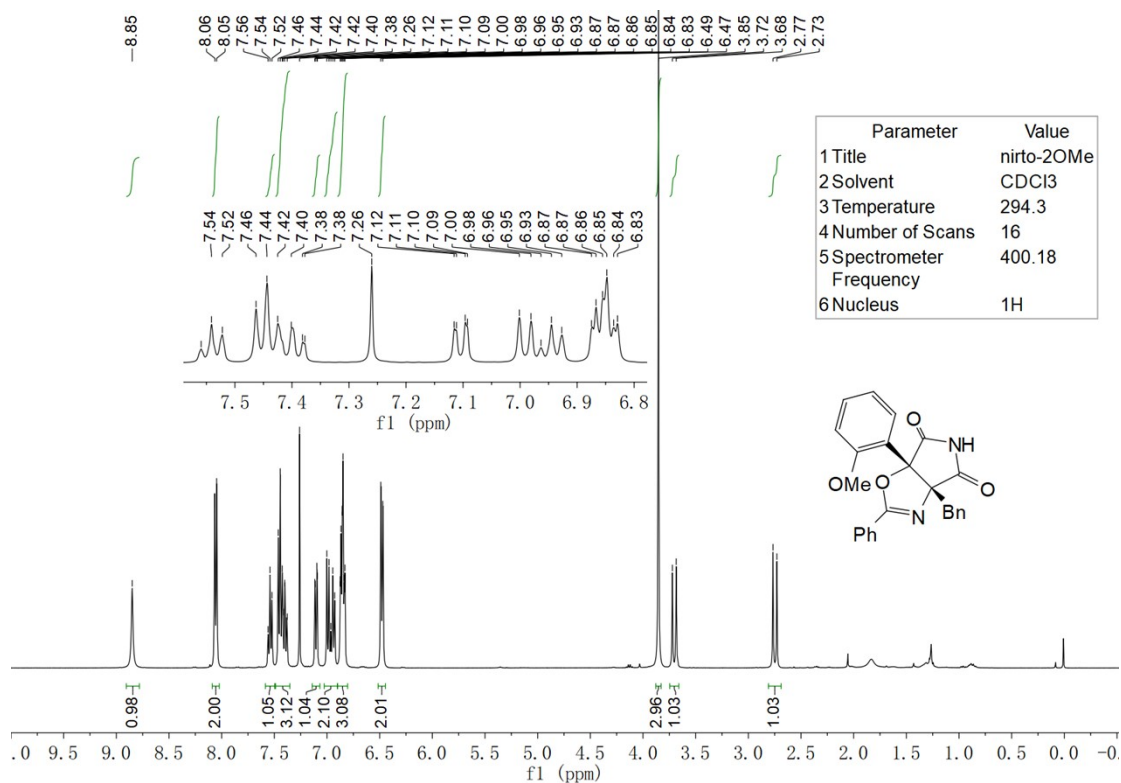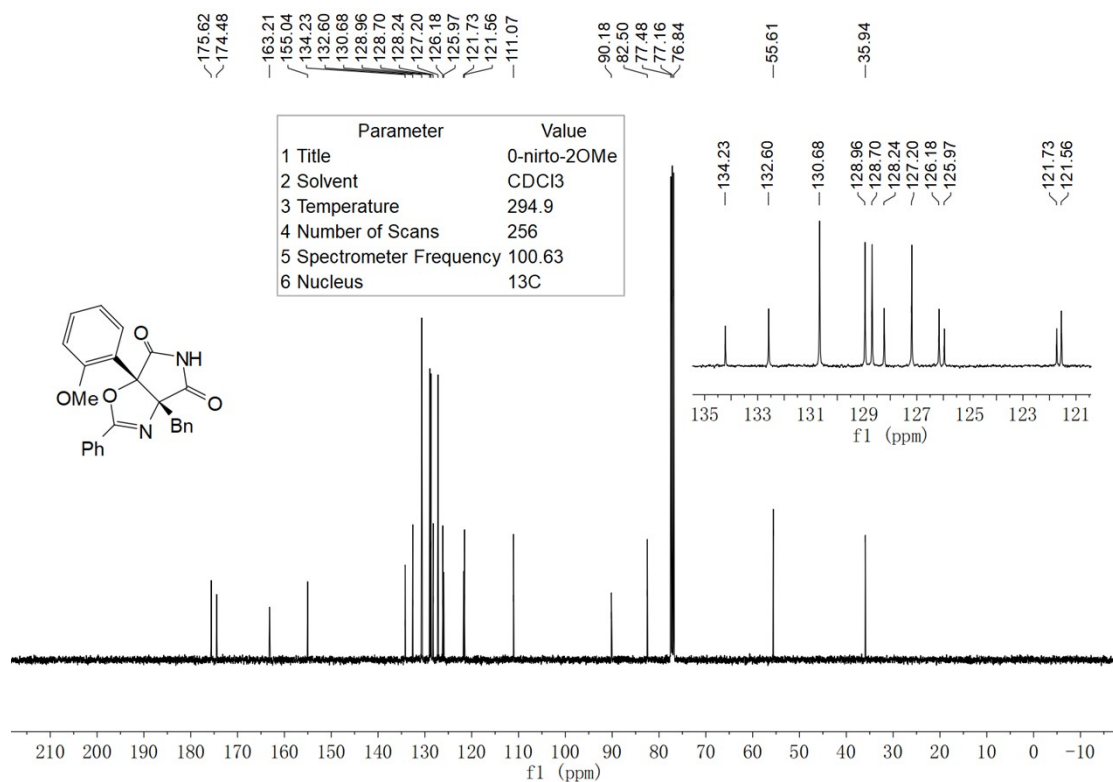



4ak

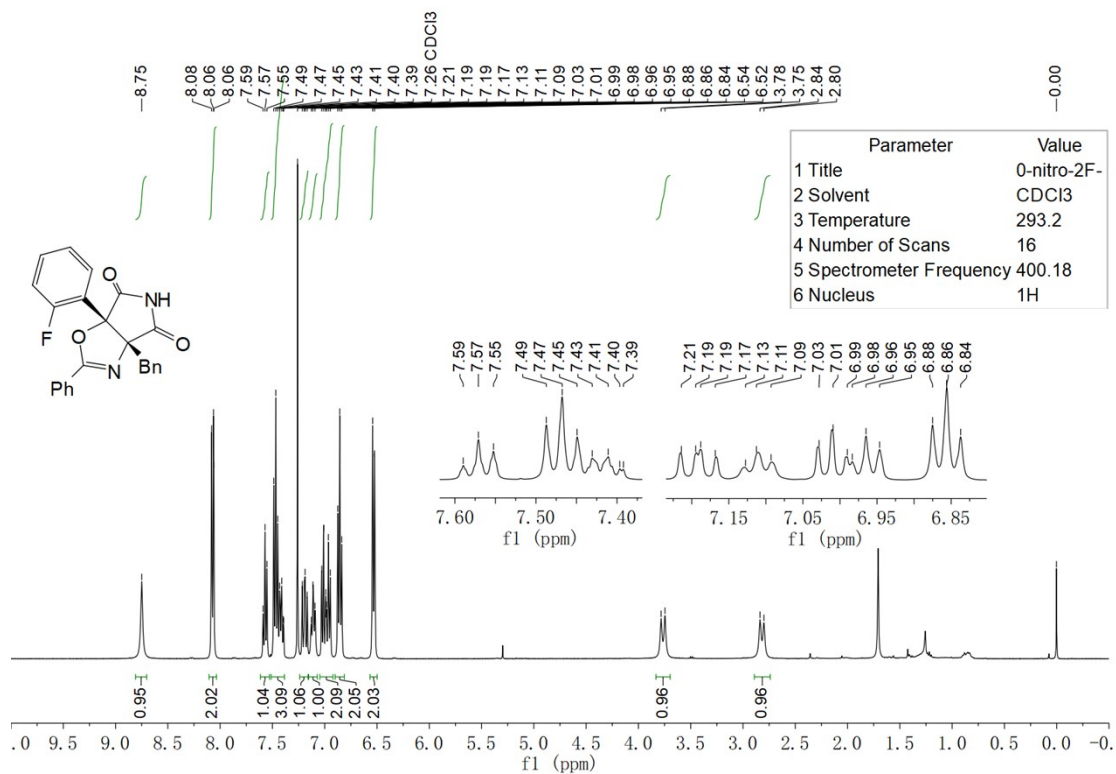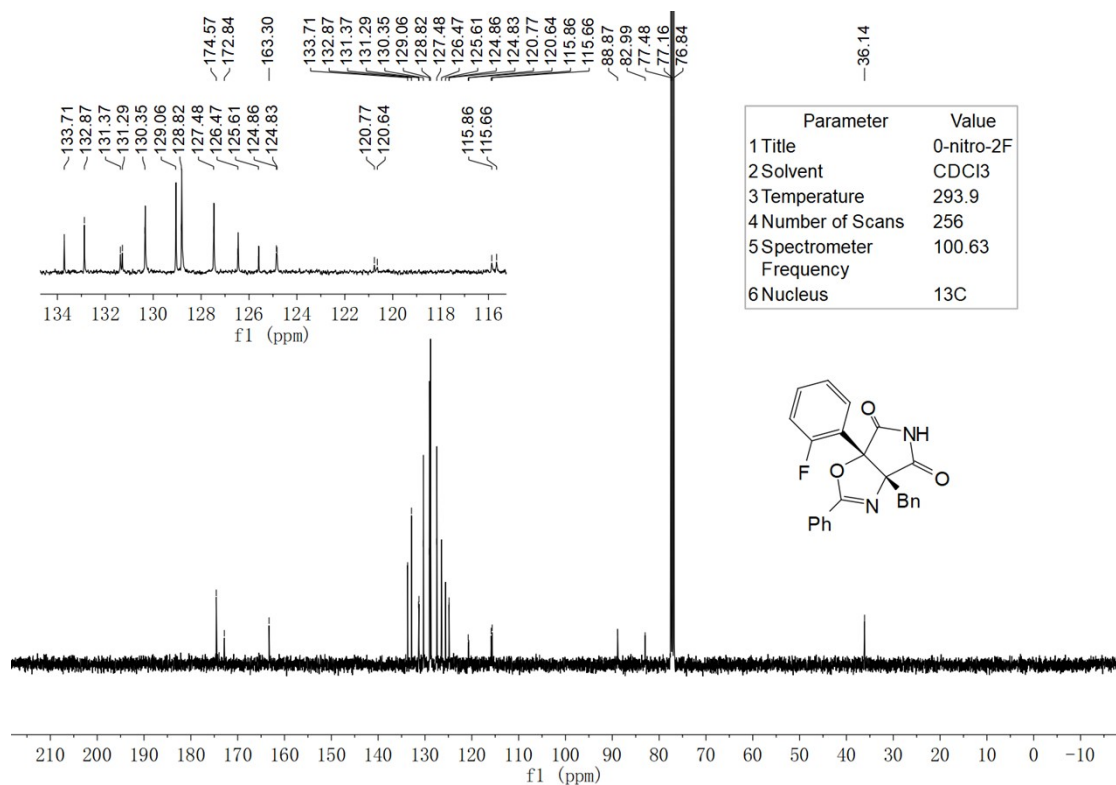

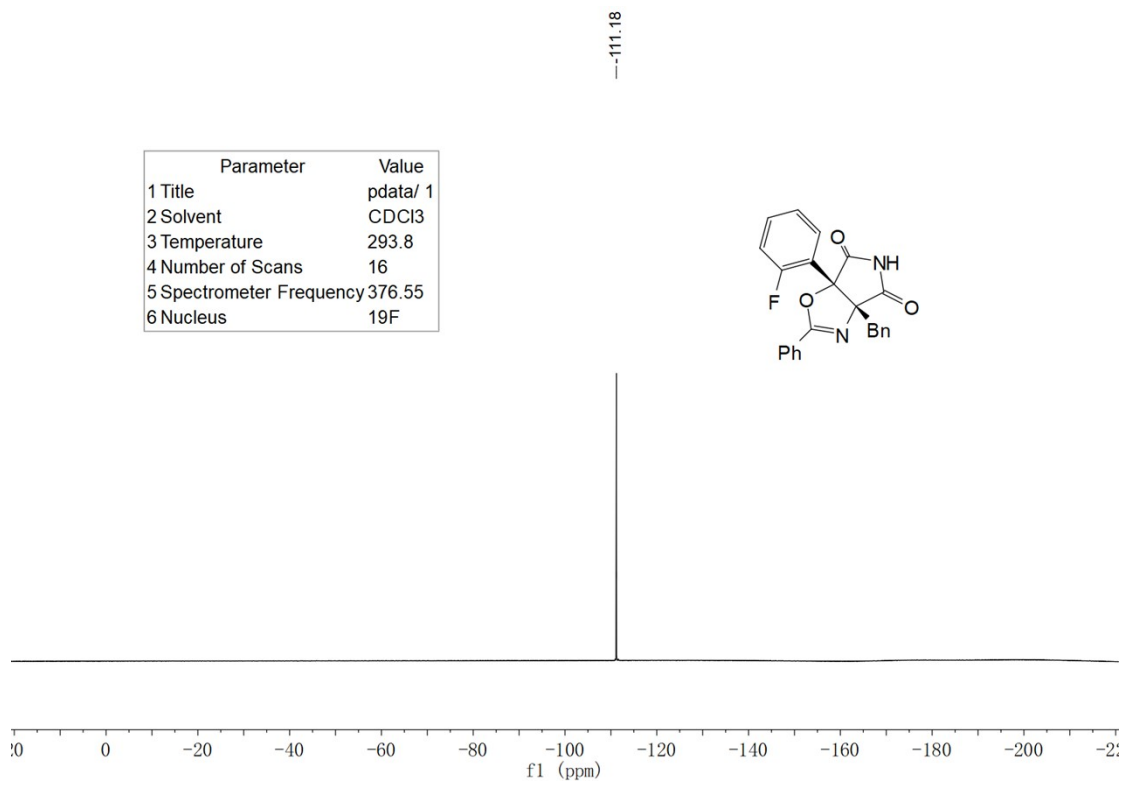

4al

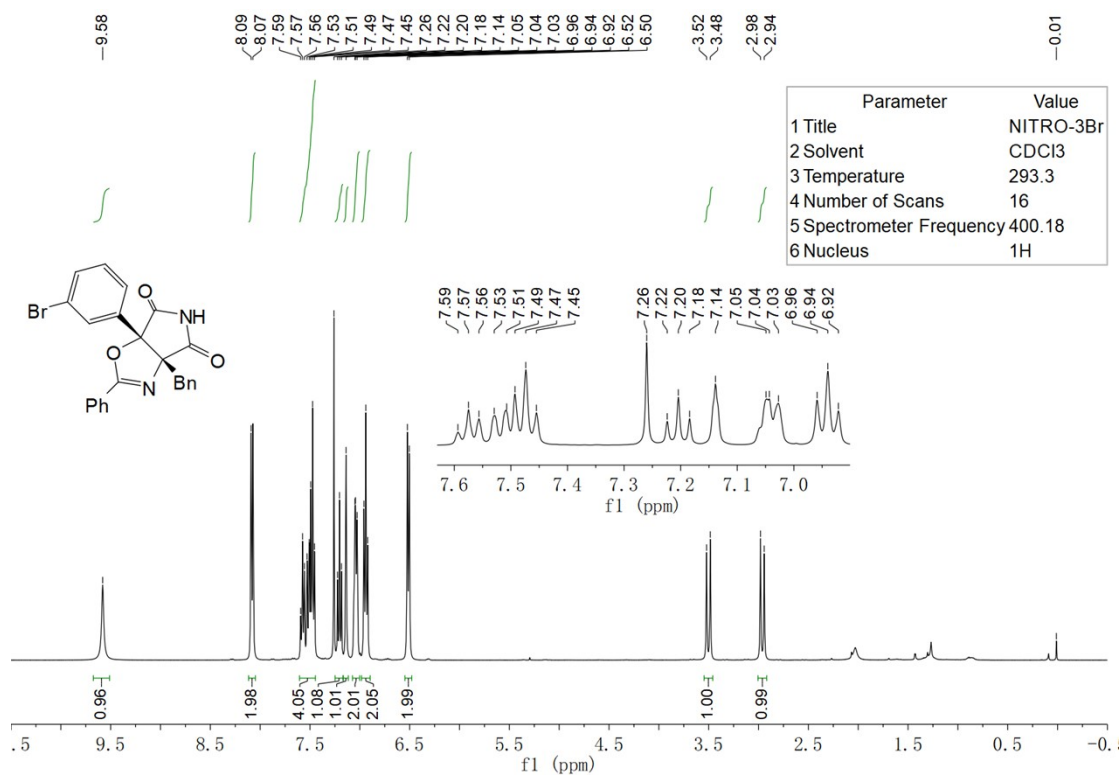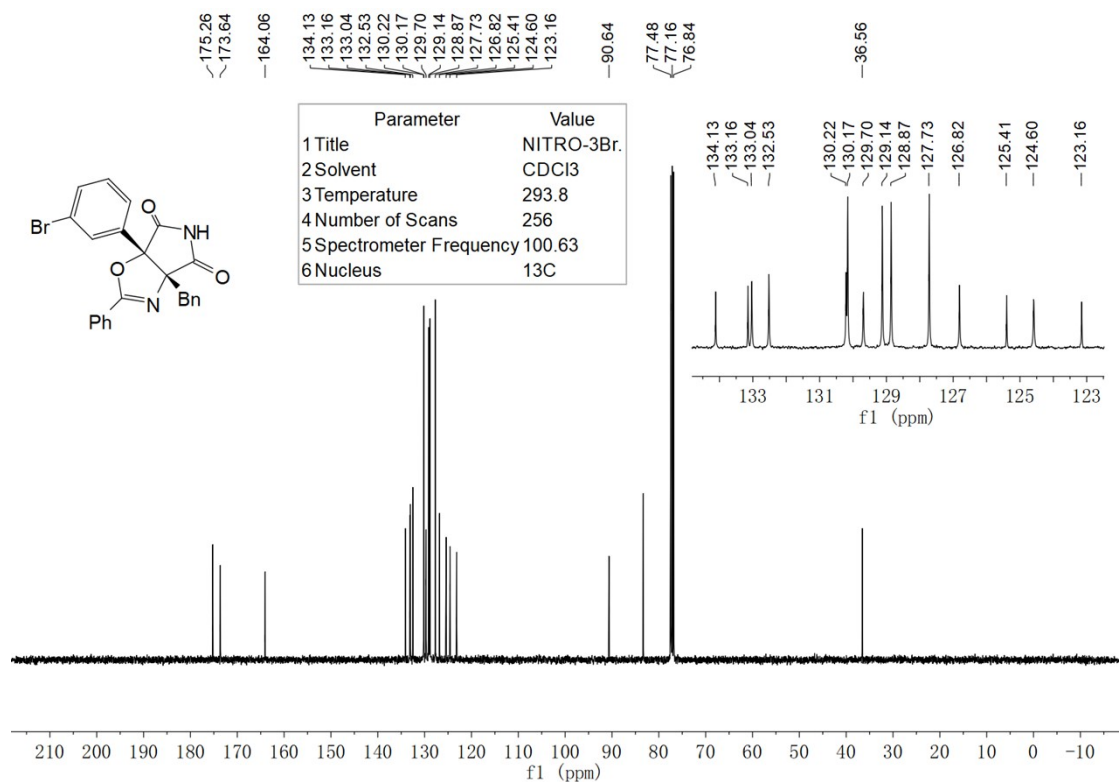

4am

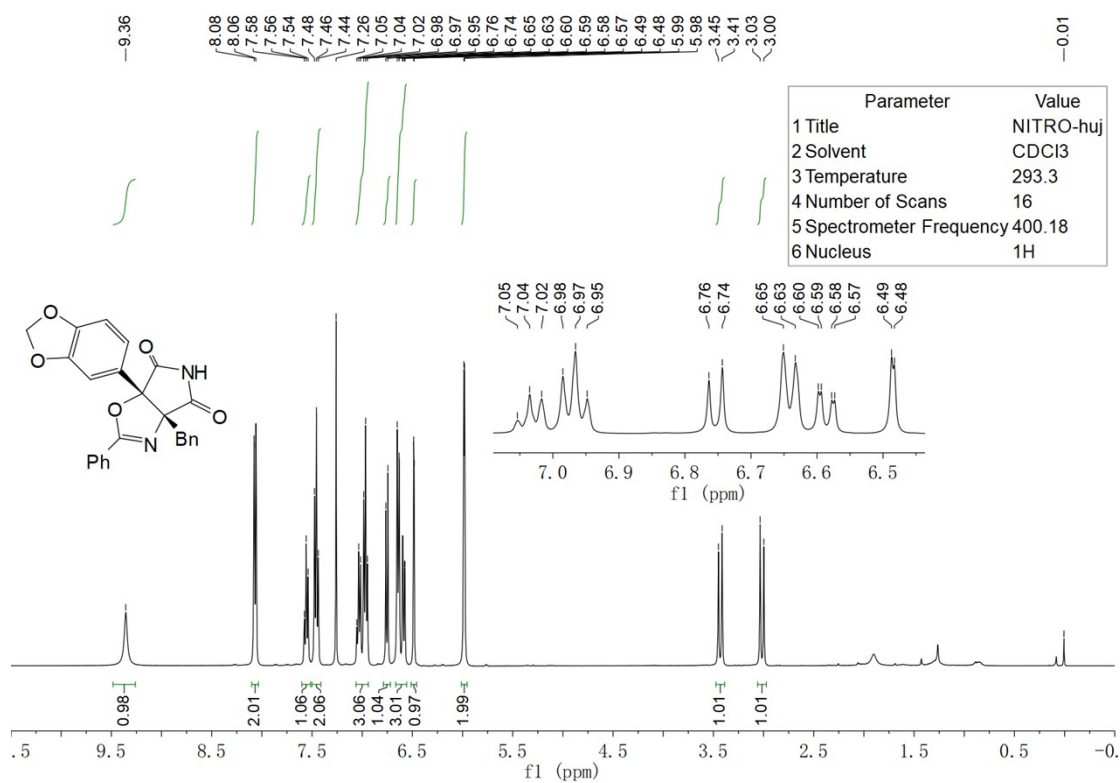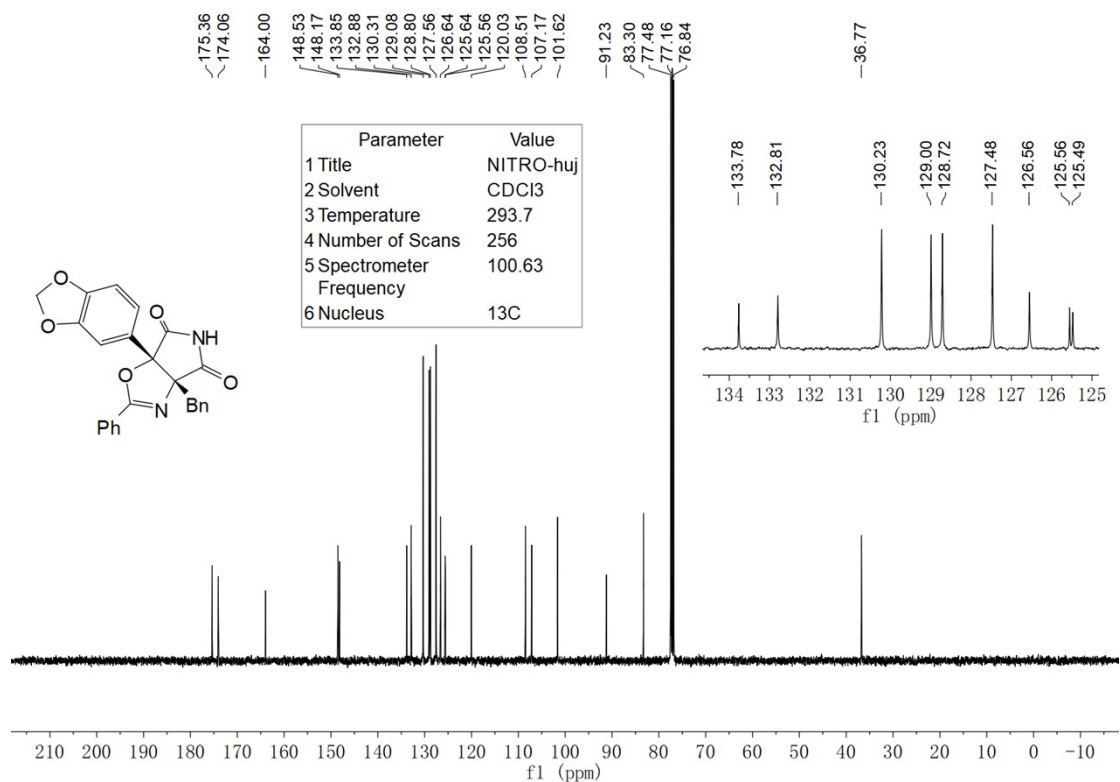

4an

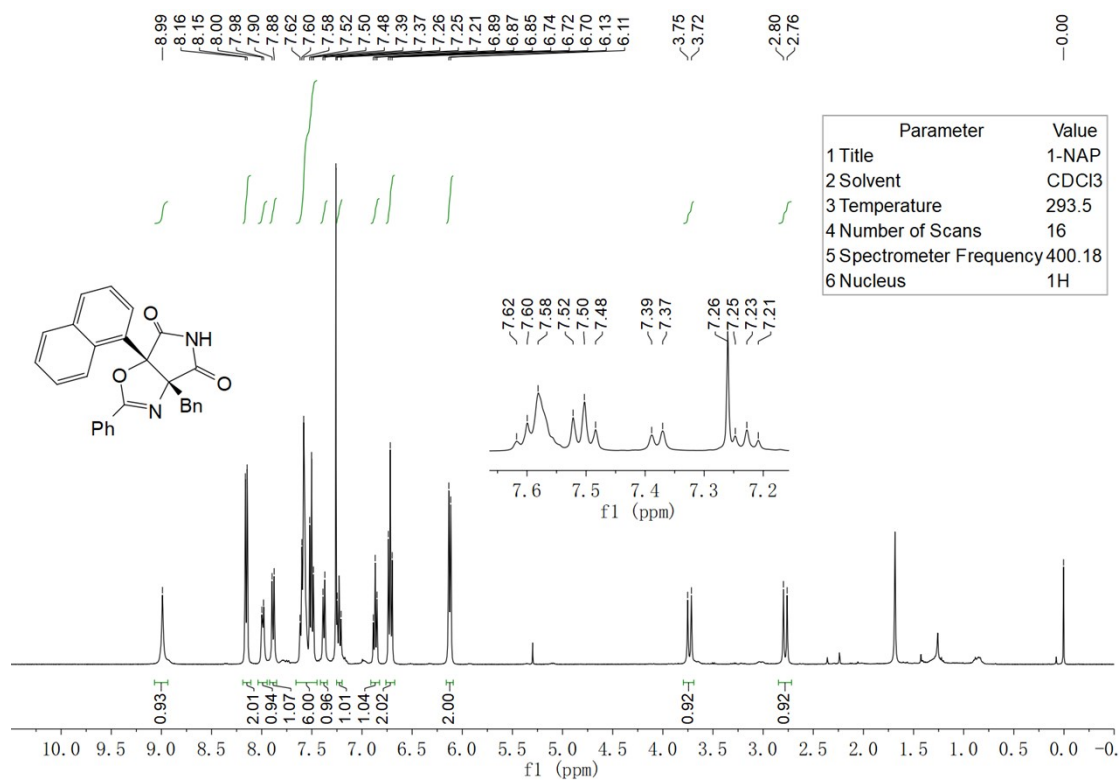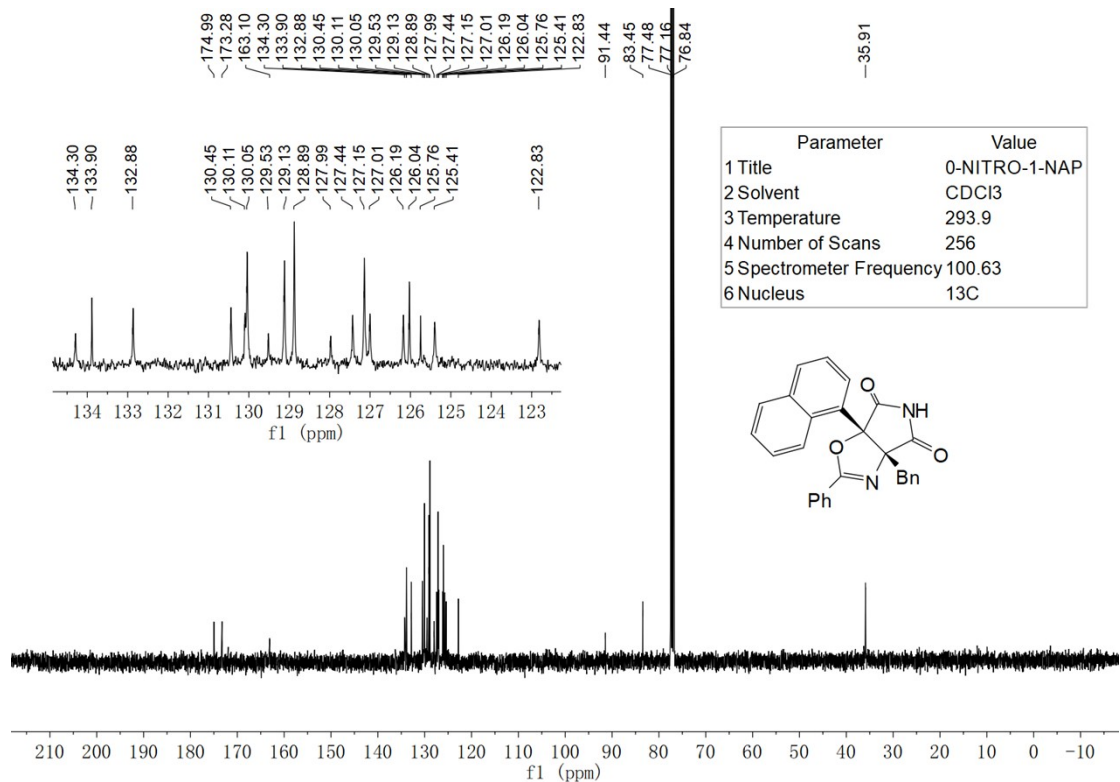

4ao

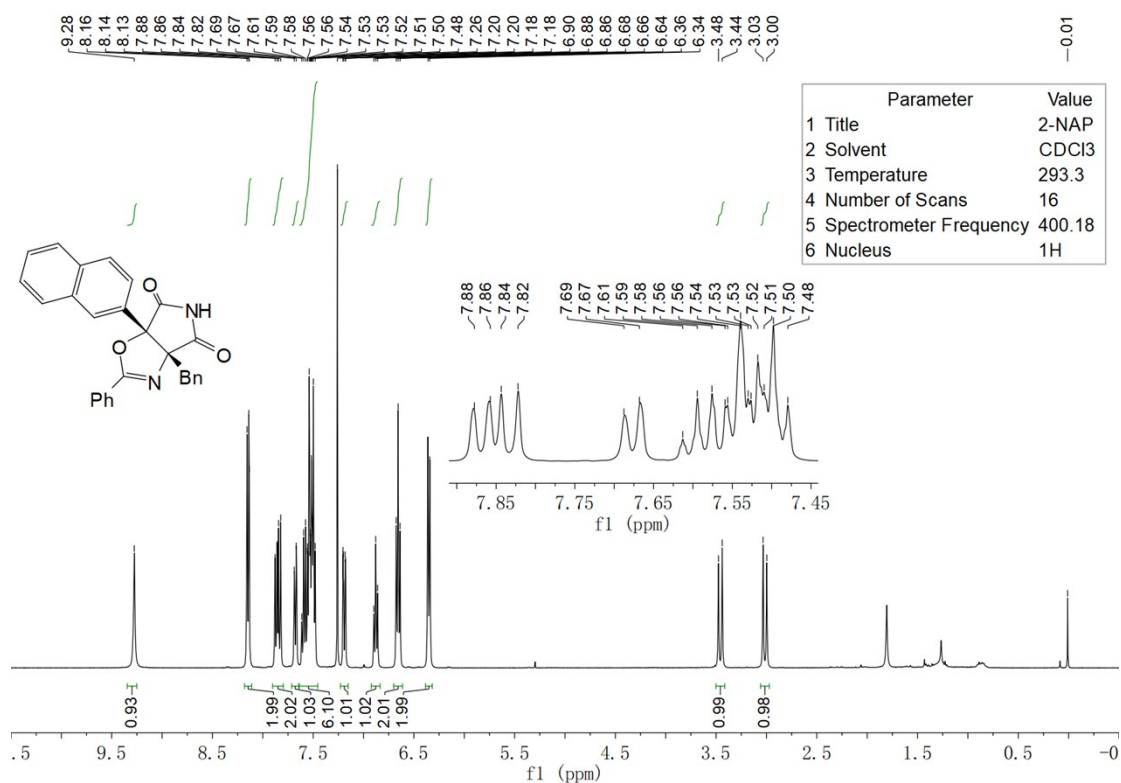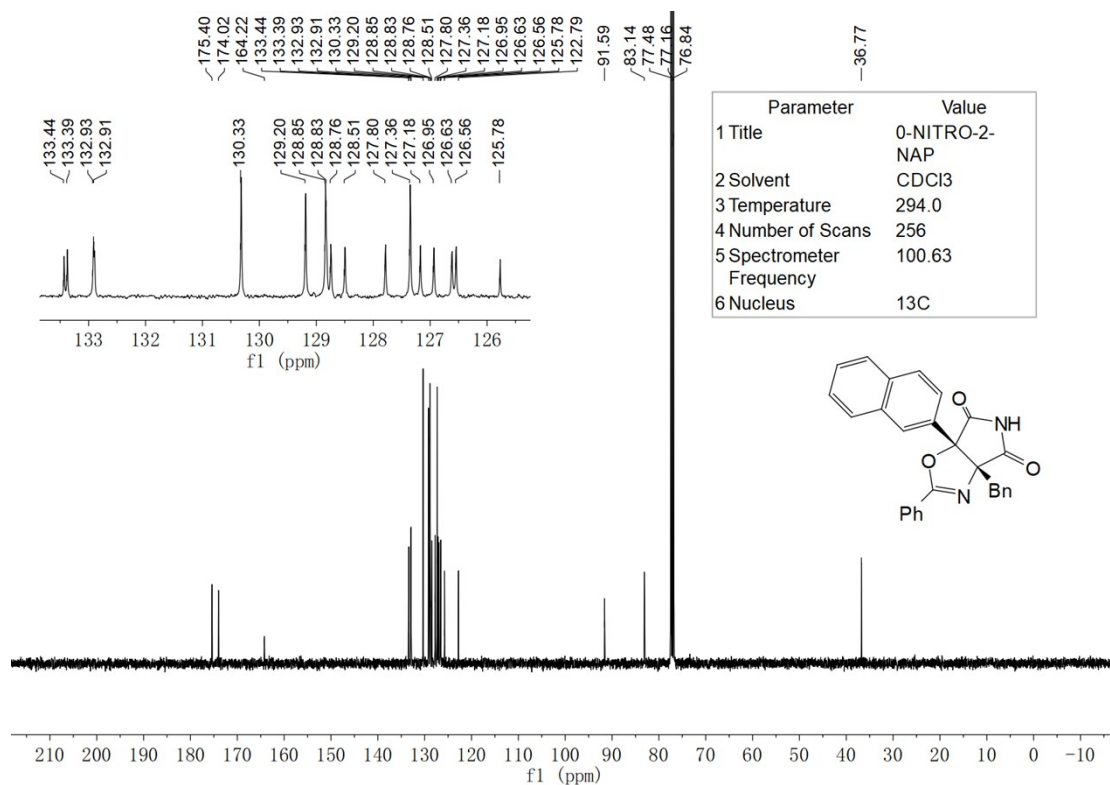



4ap

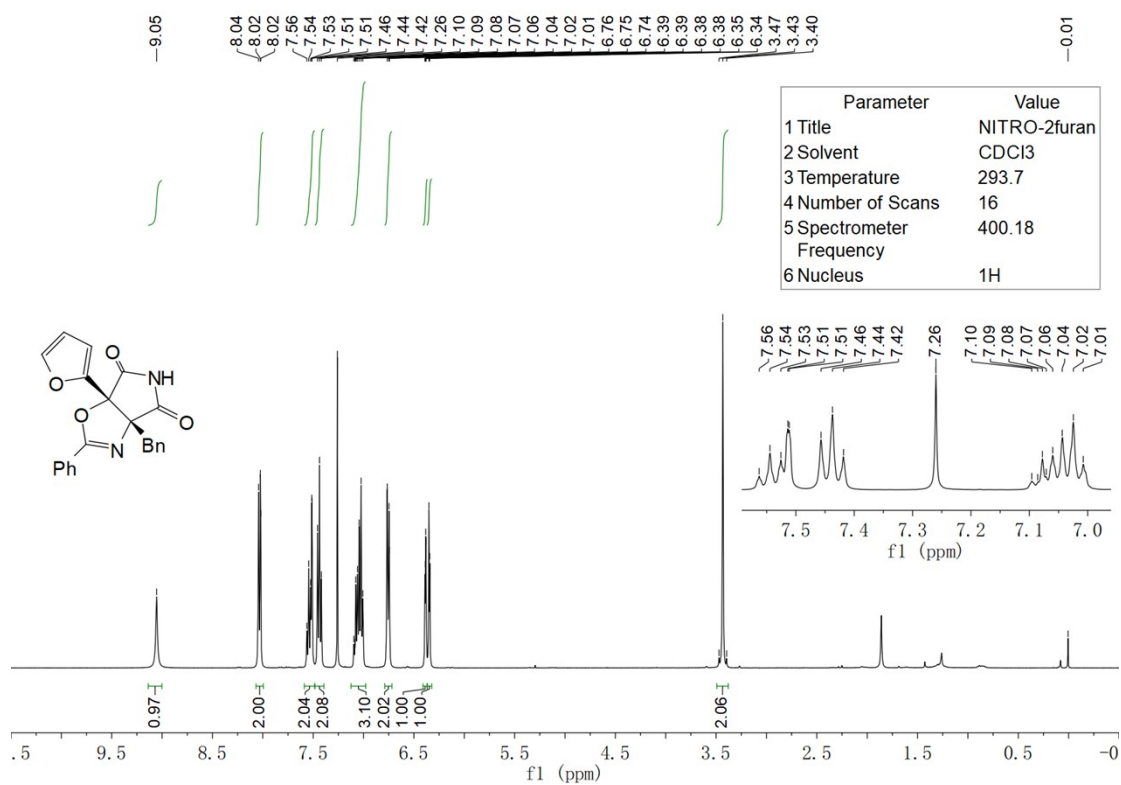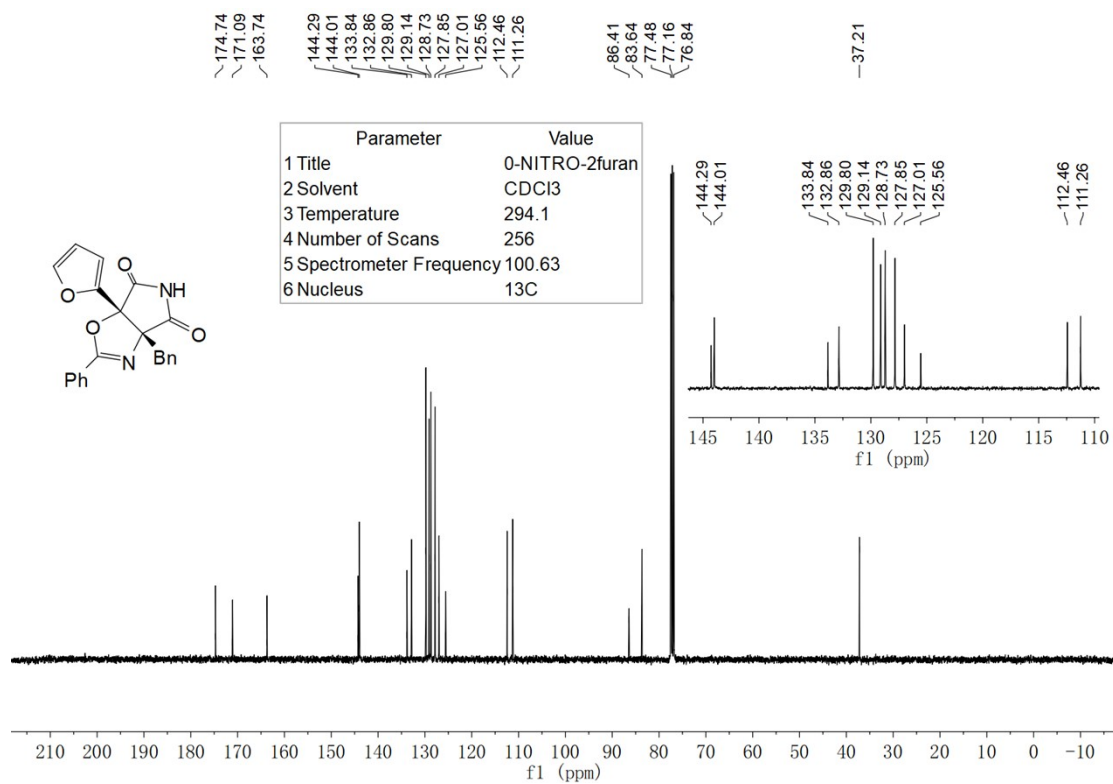

4aq

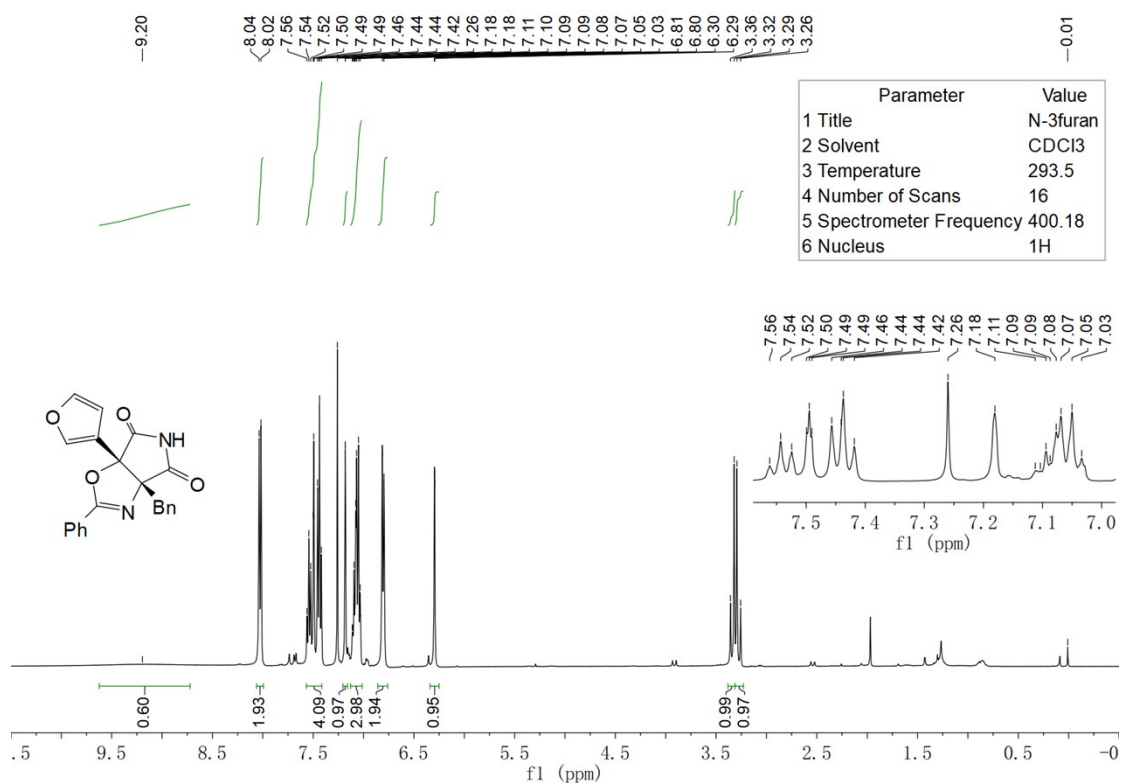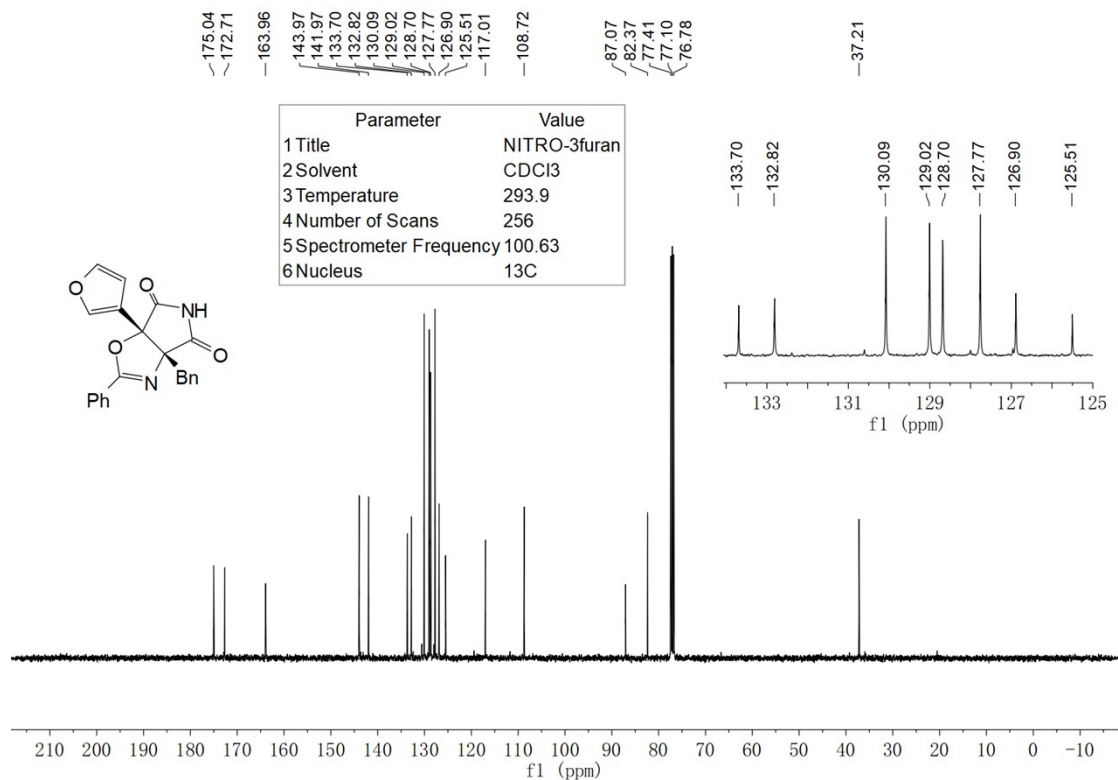



4ar

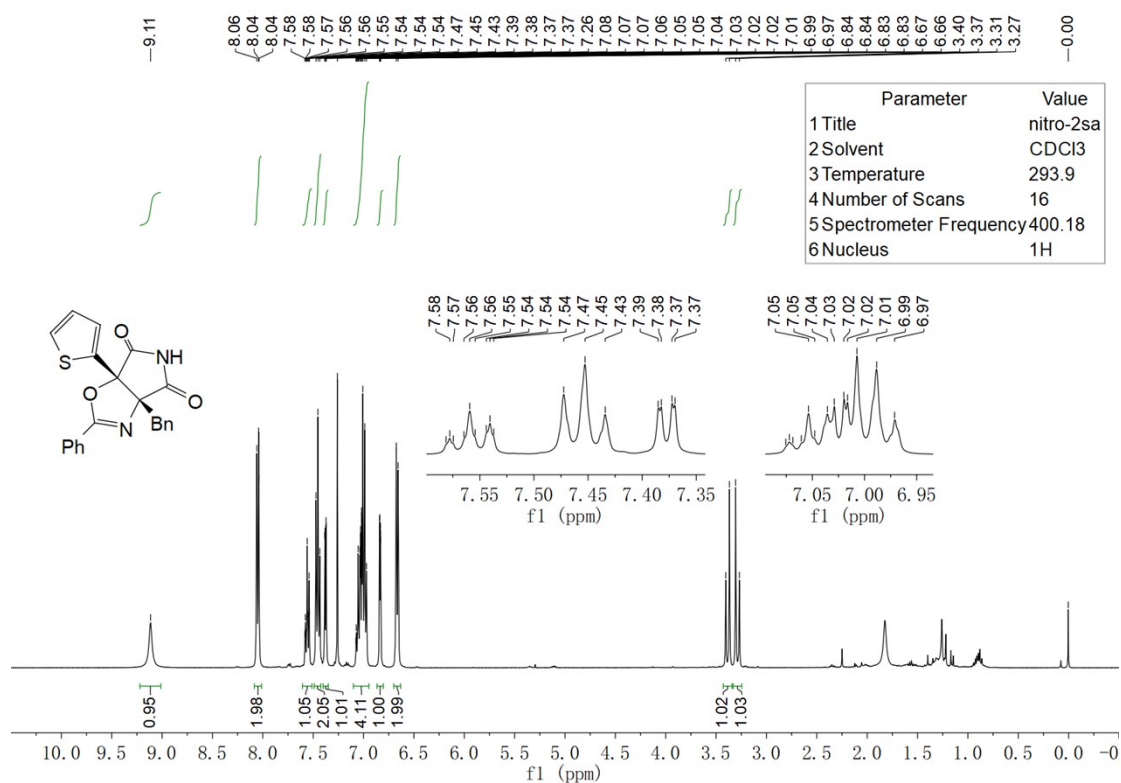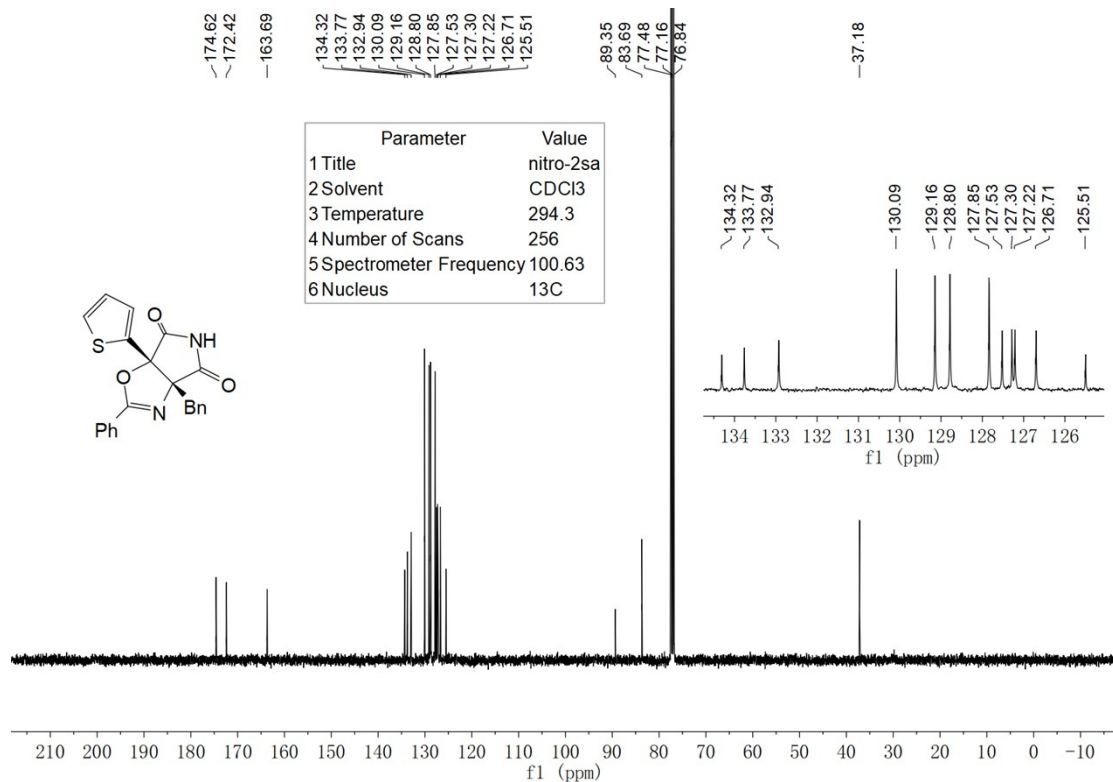

4as

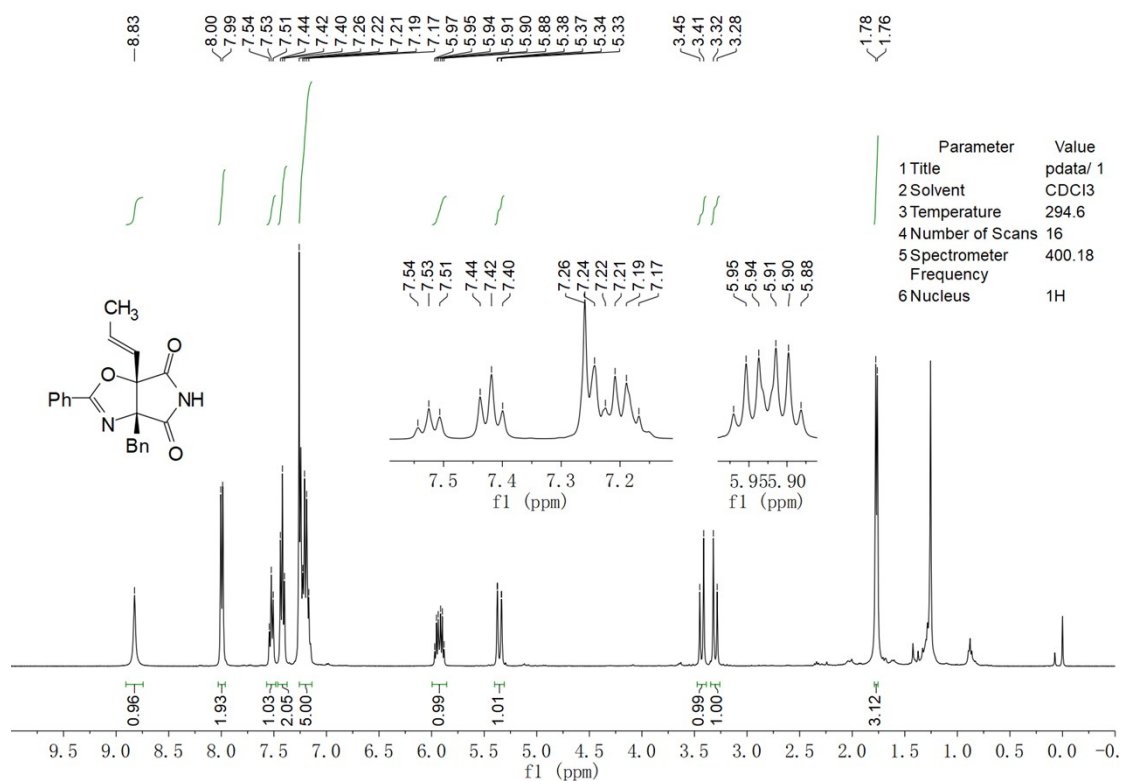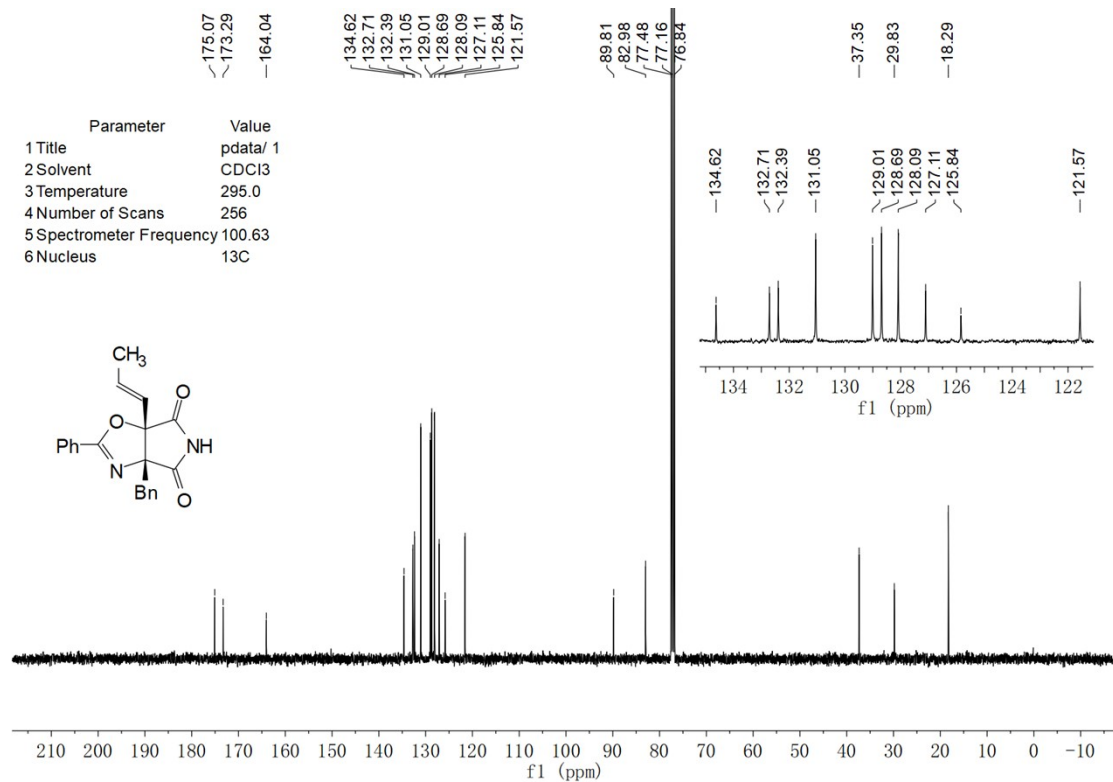

4at

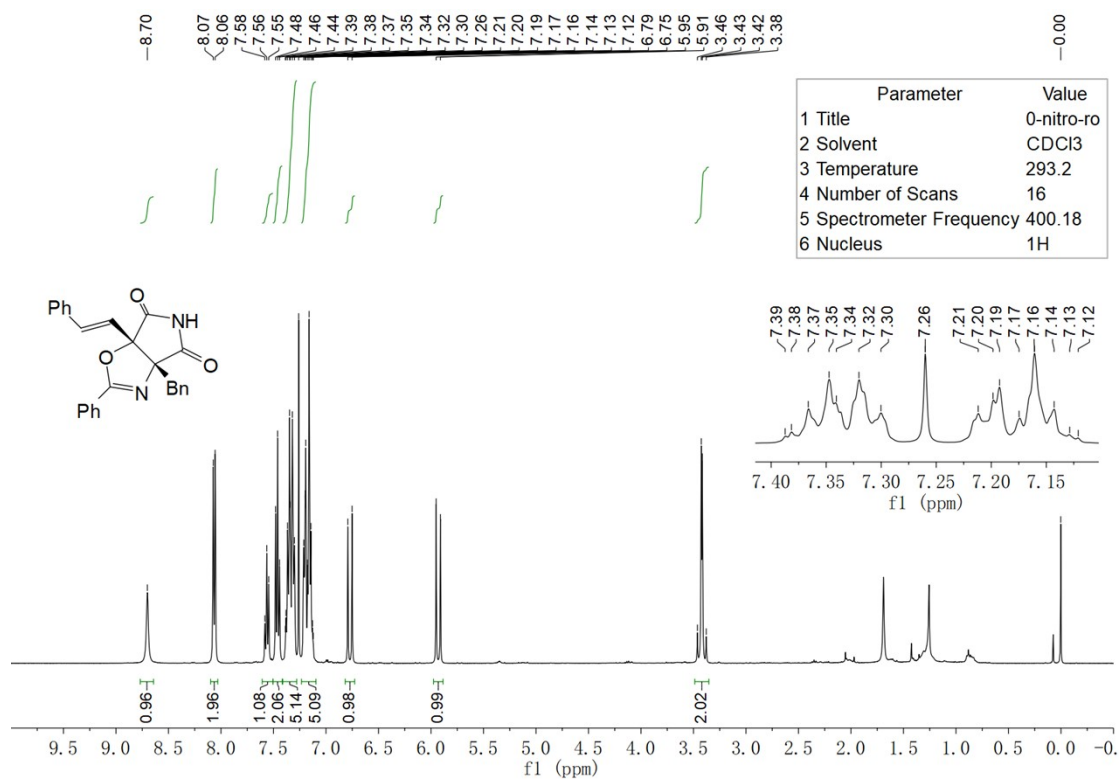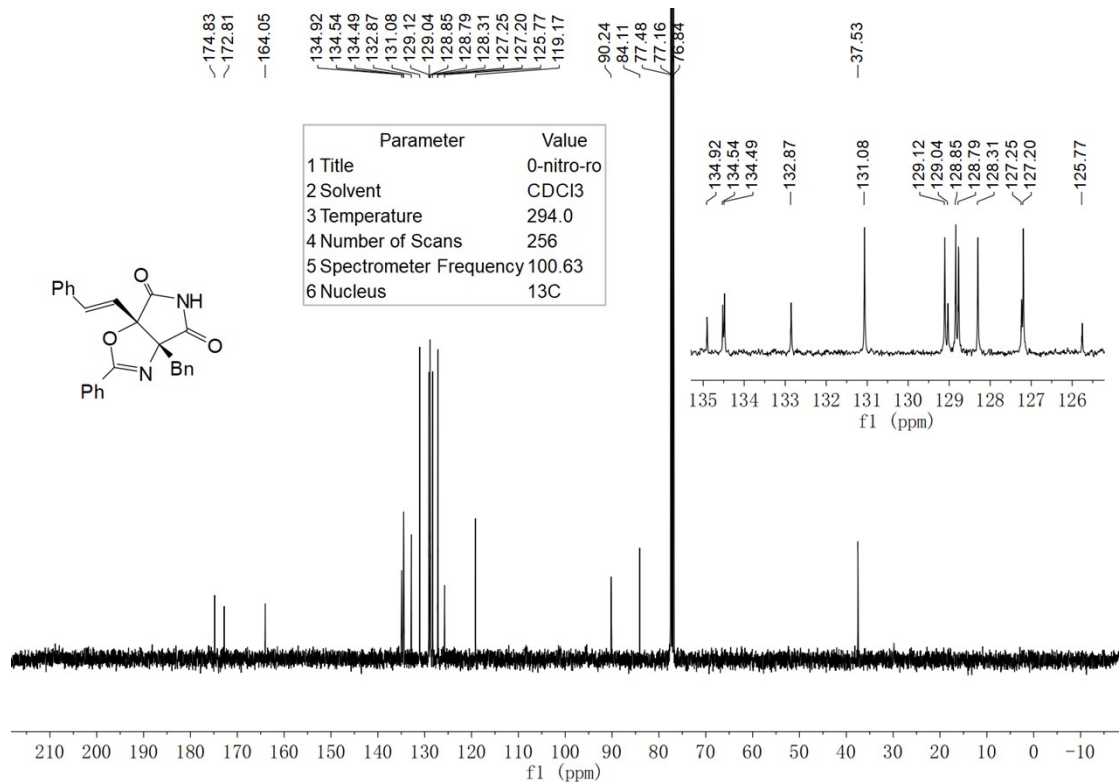



4ca

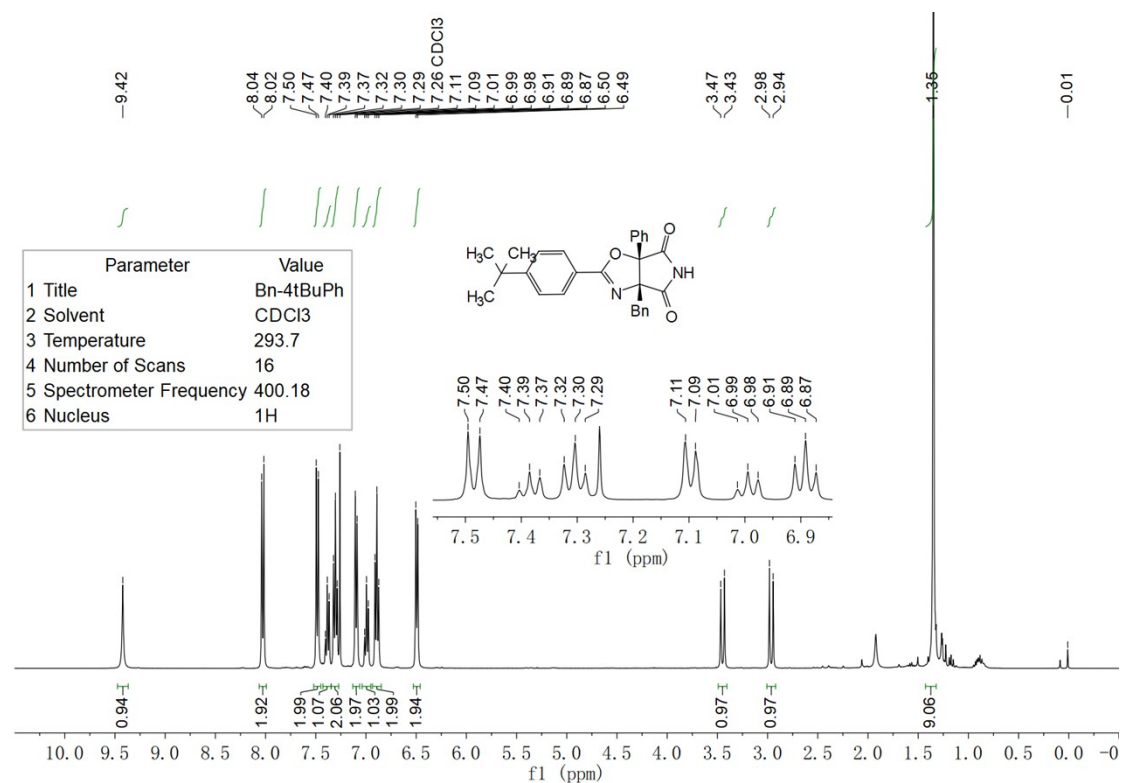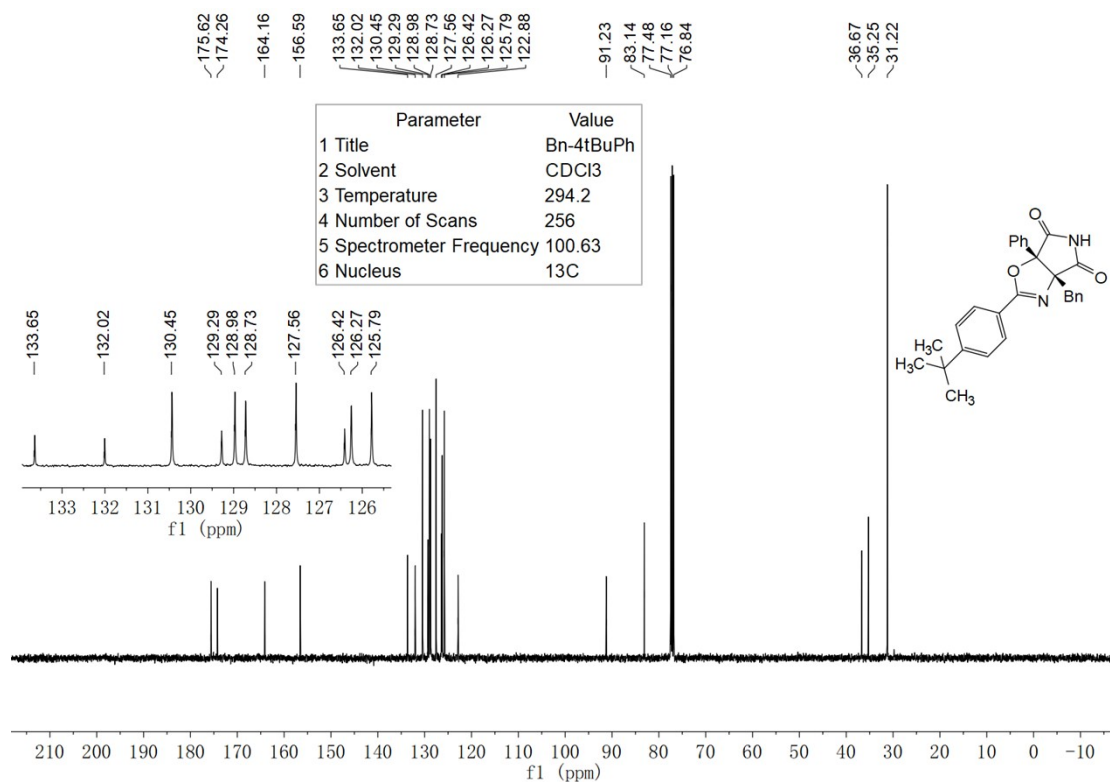

4da

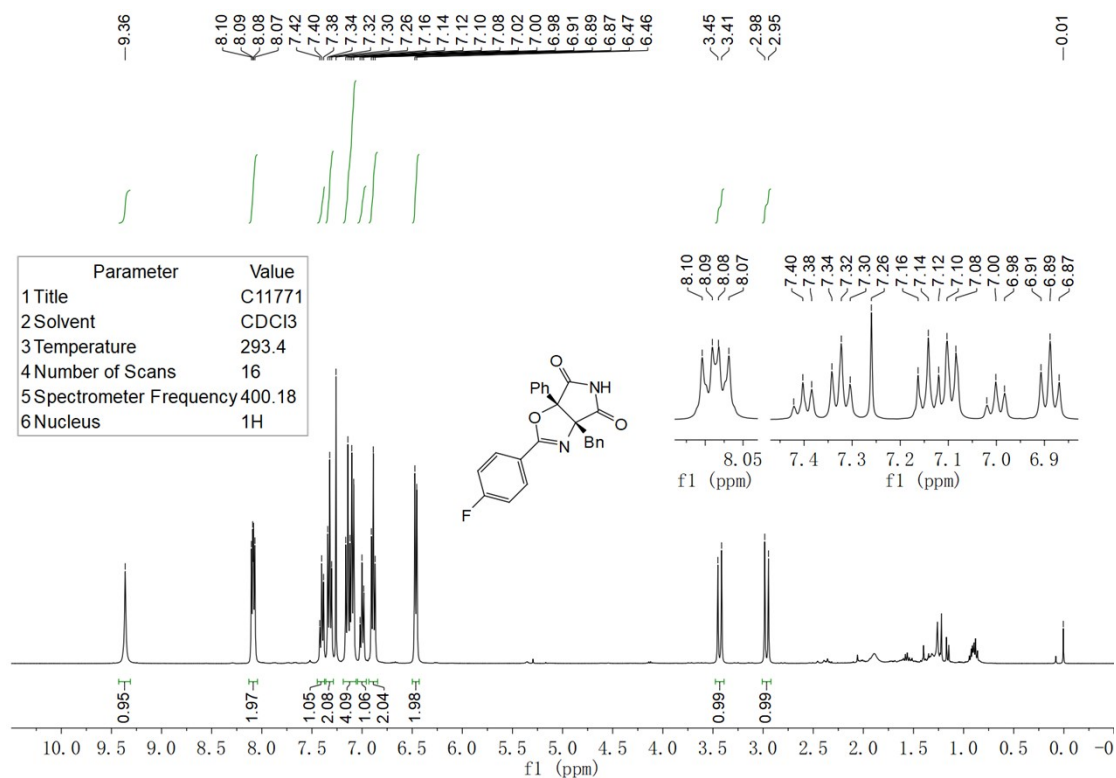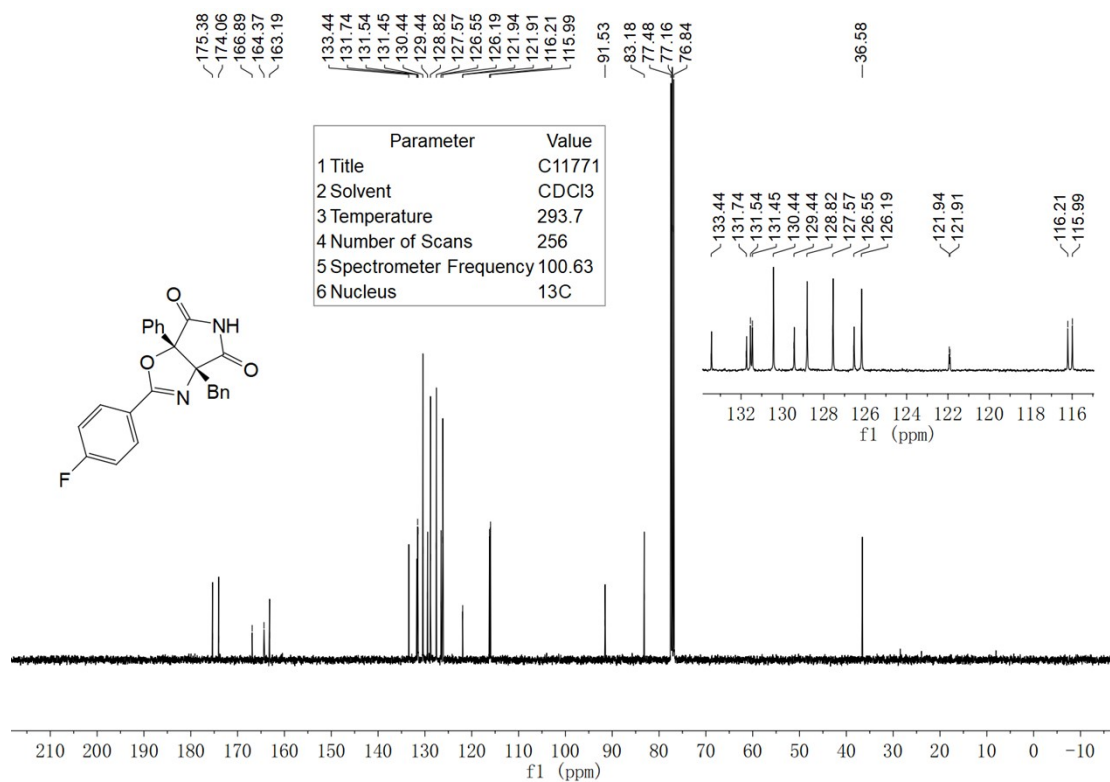



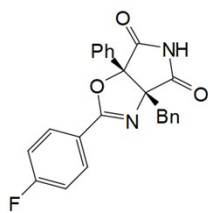

--105.27

| Parameter                | Value     |
|--------------------------|-----------|
| 1 Title                  | 0-11744-F |
| 2 Solvent                | CDCl3     |
| 3 Temperature            | 293.7     |
| 4 Number of Scans        | 16        |
| 5 Spectrometer Frequency | 376.55    |
| 6 Nucleus                | 19F       |

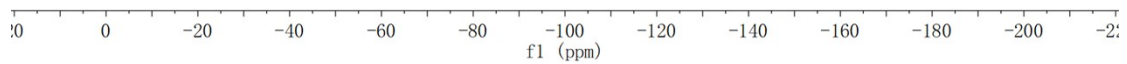

4ea

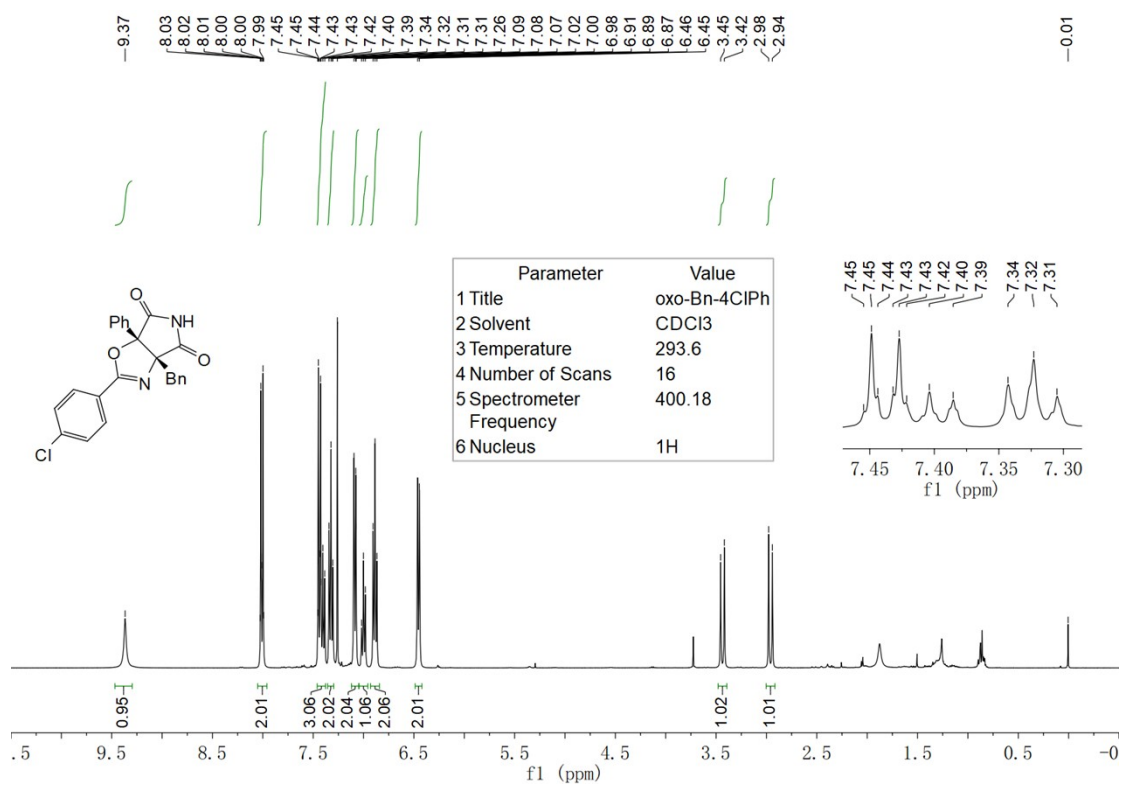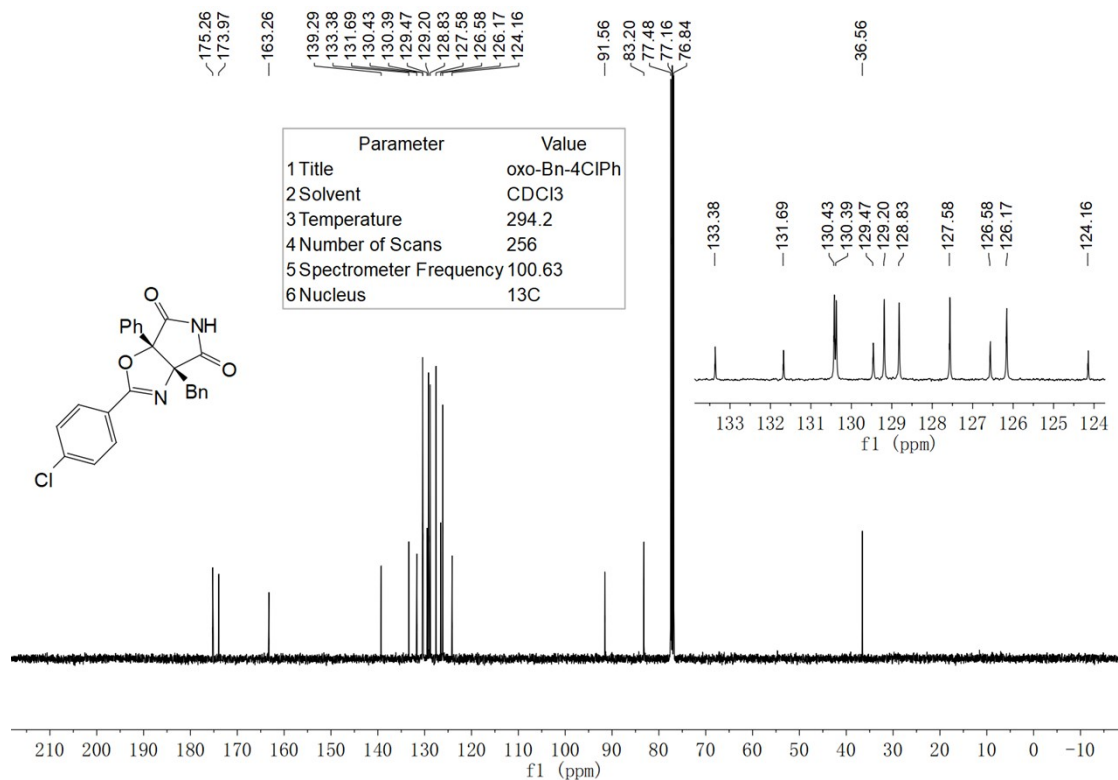



4fa

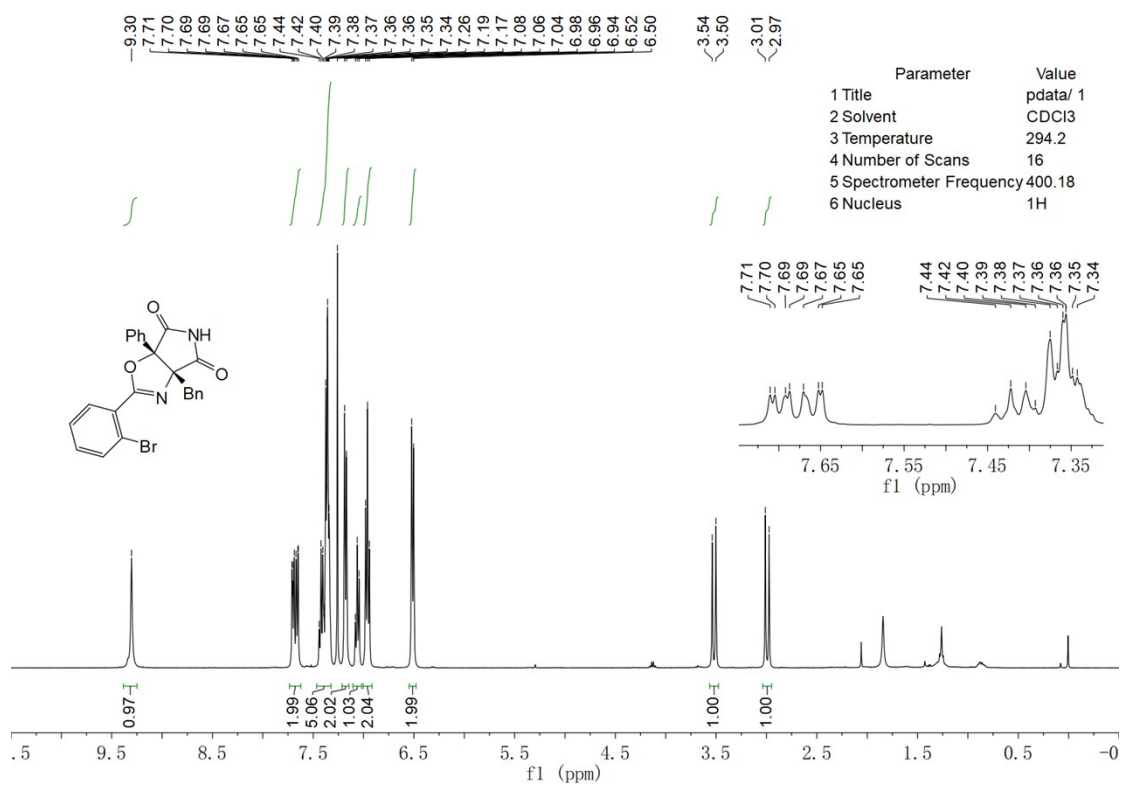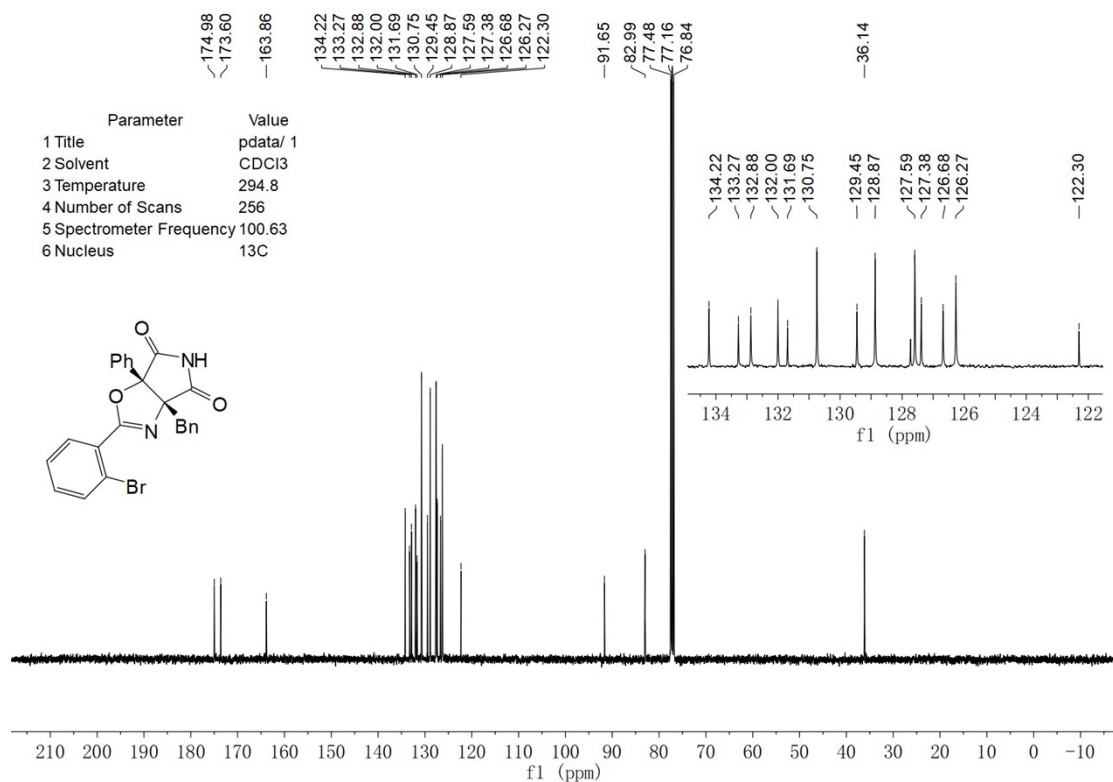

4ga

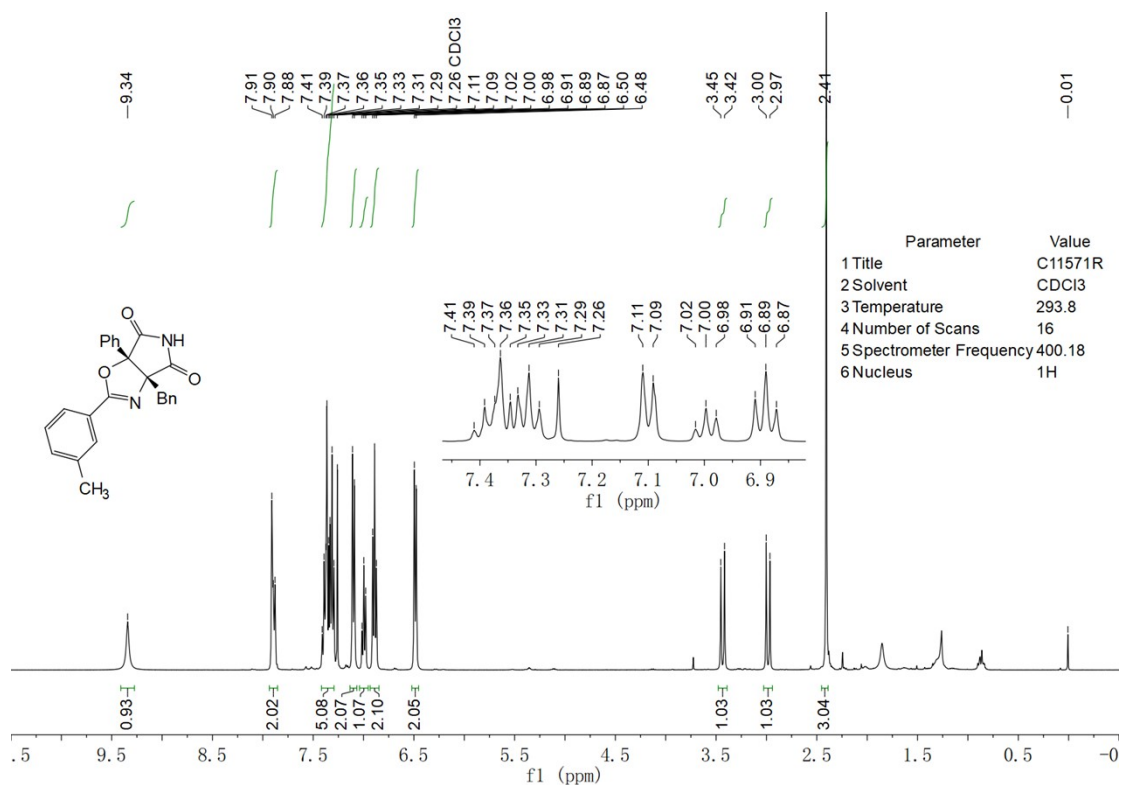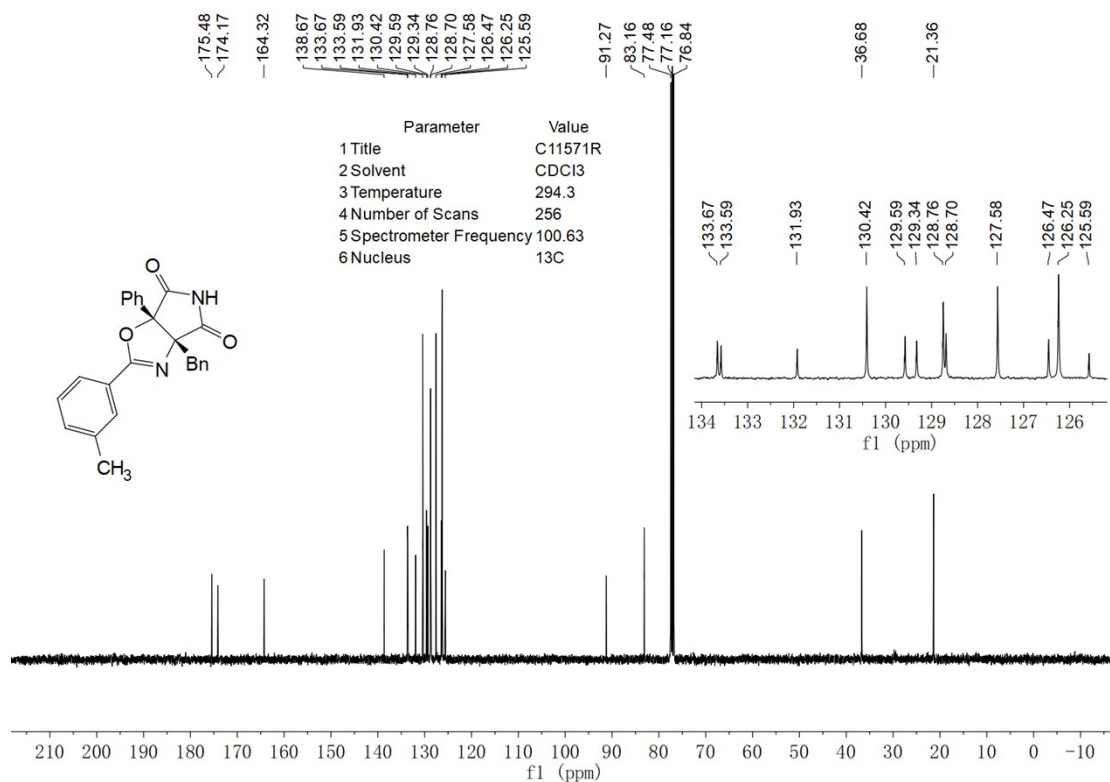

4ha

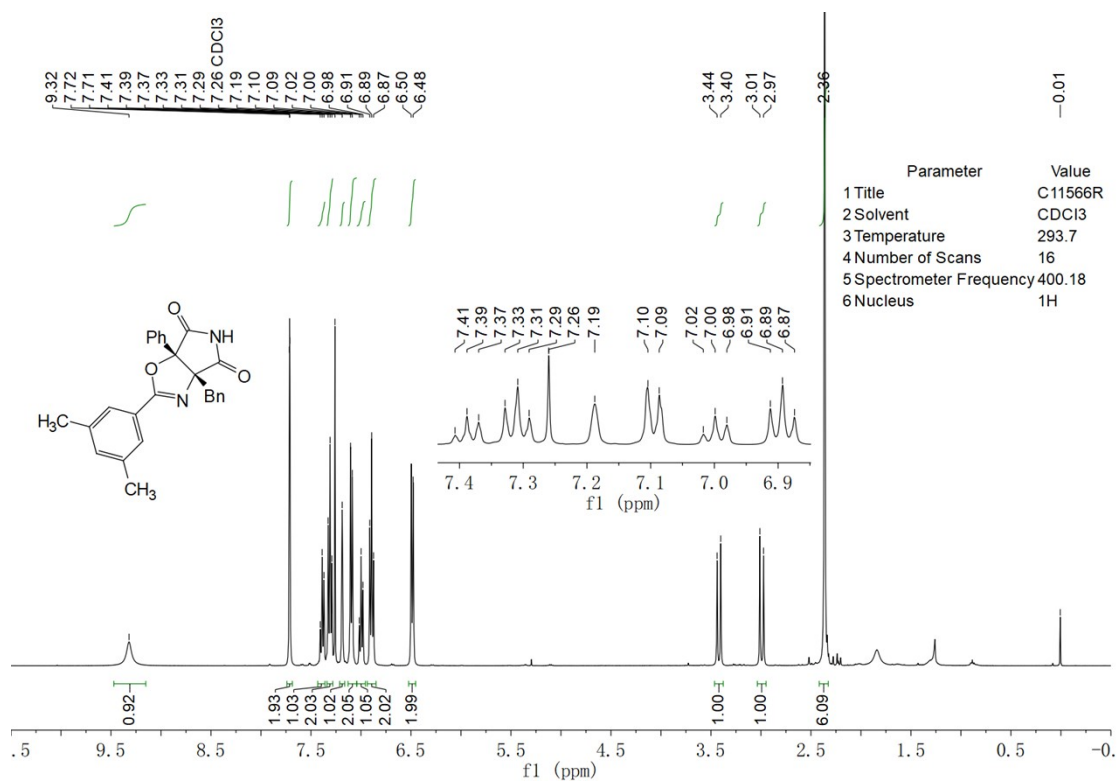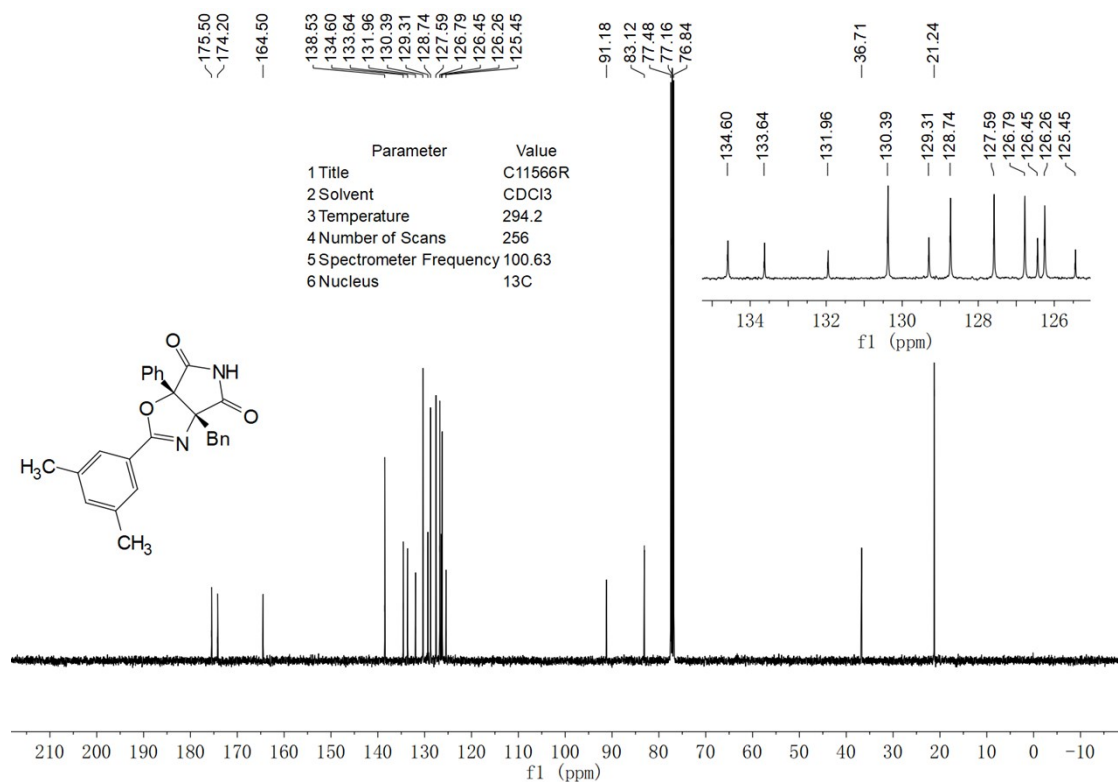

4ia

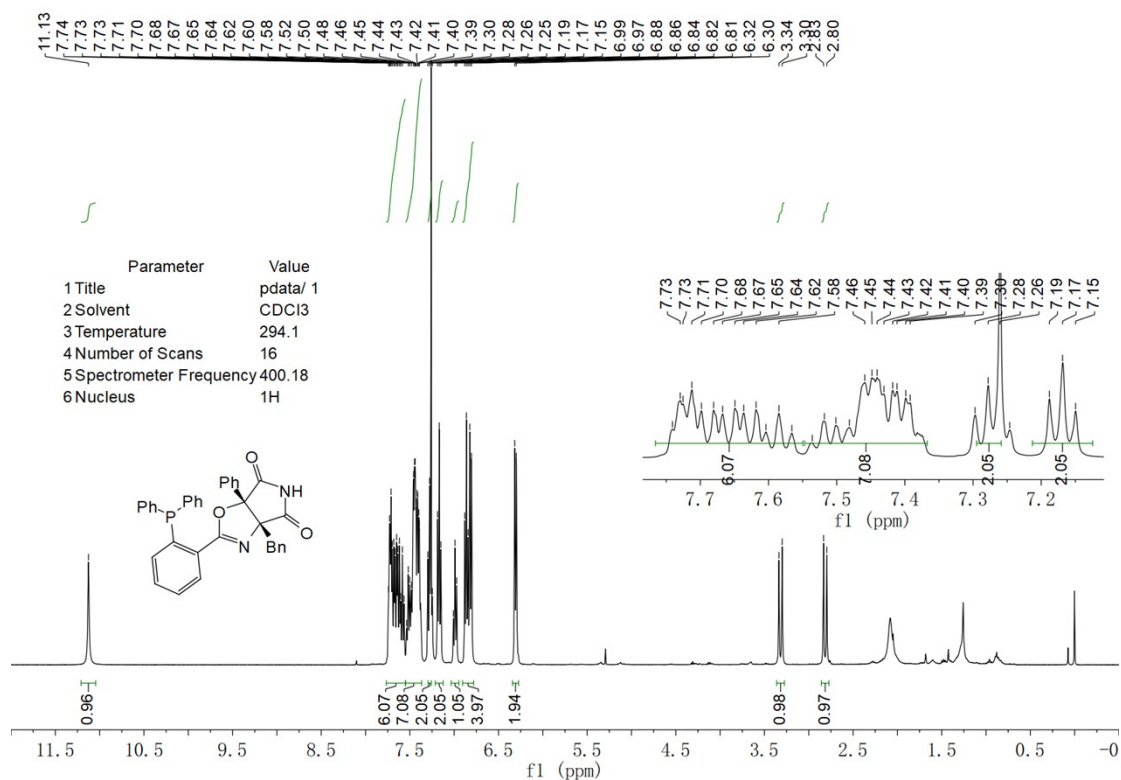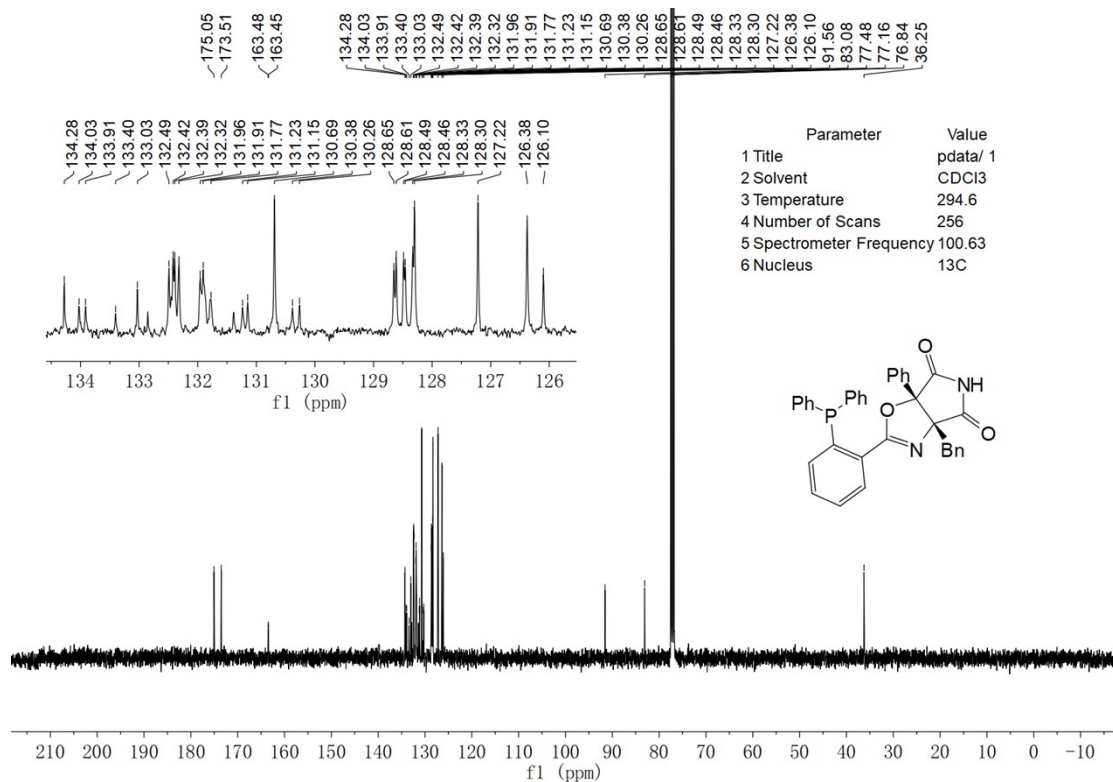

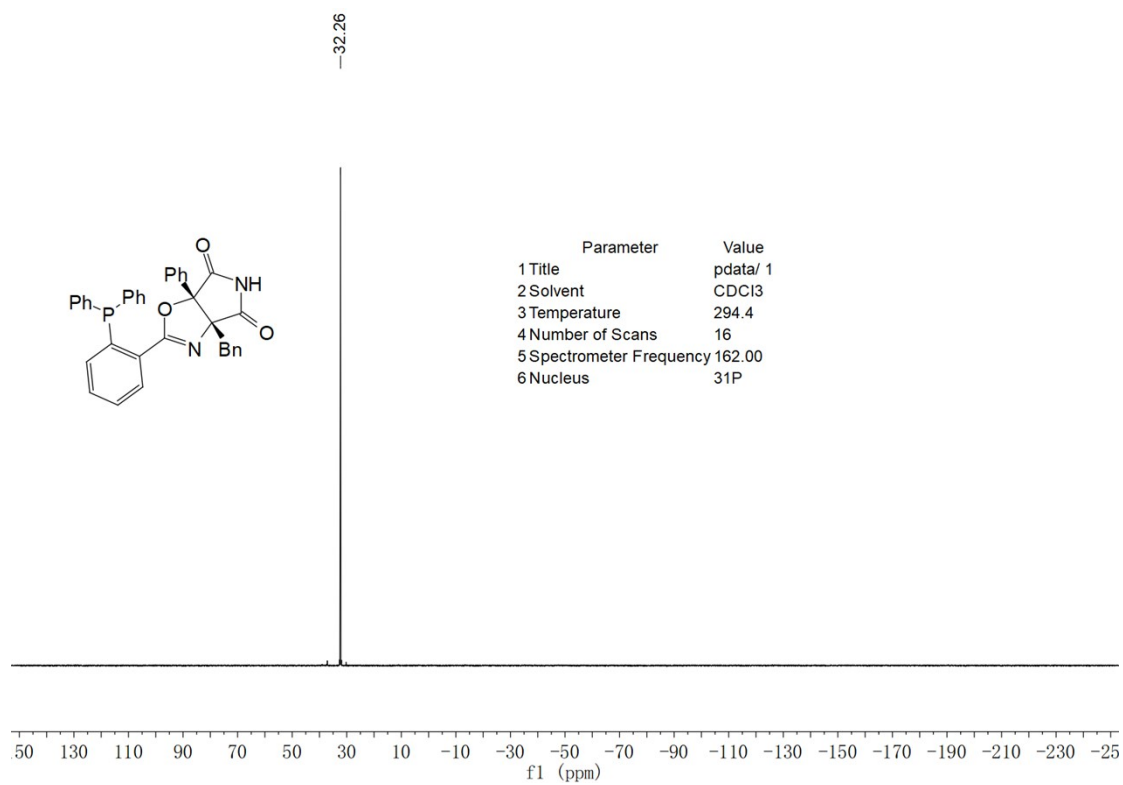

4ja

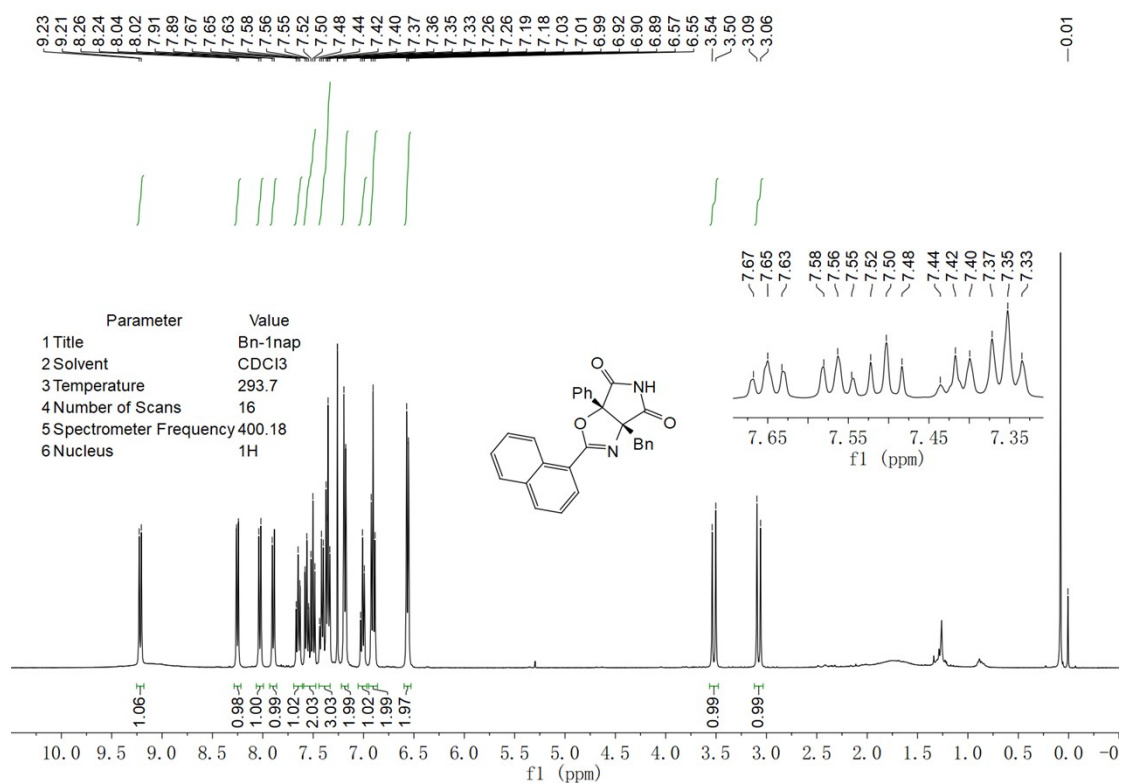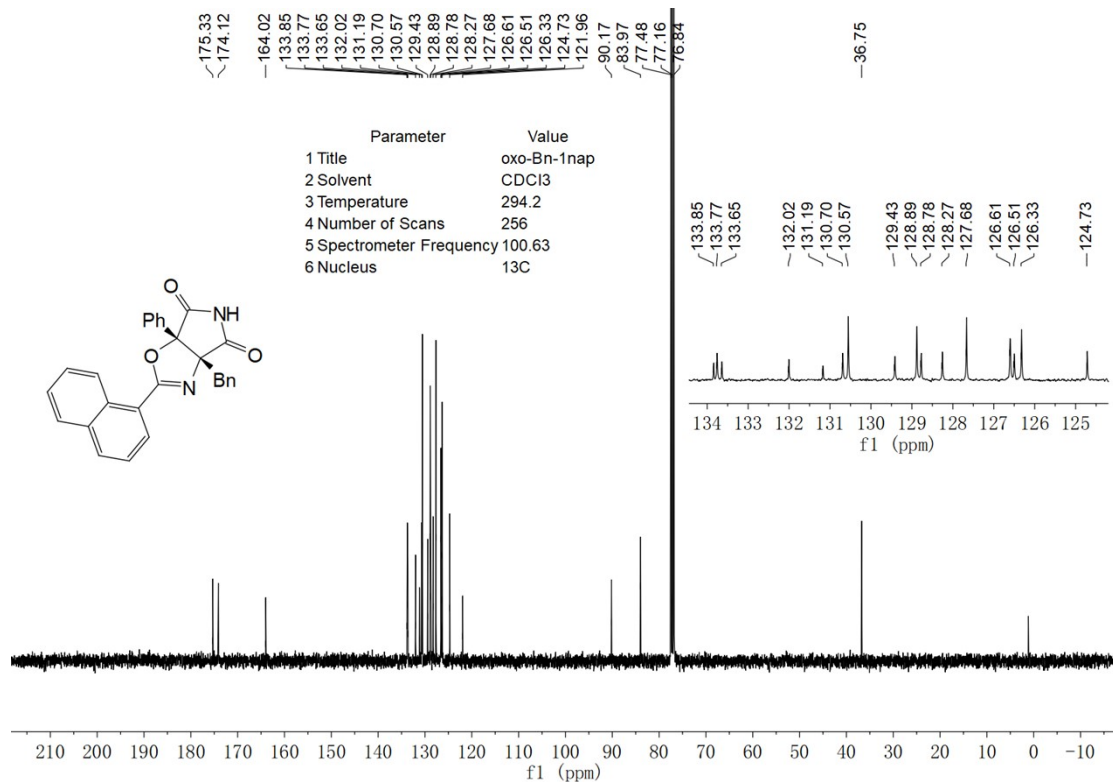



4ka

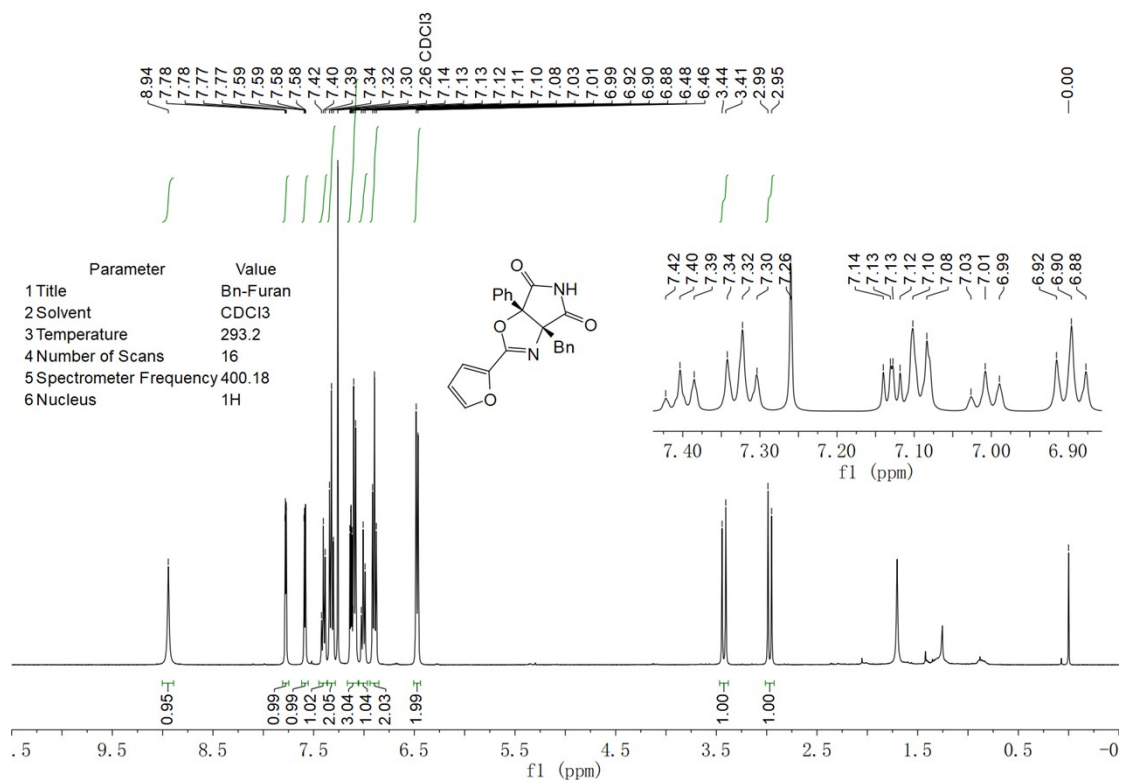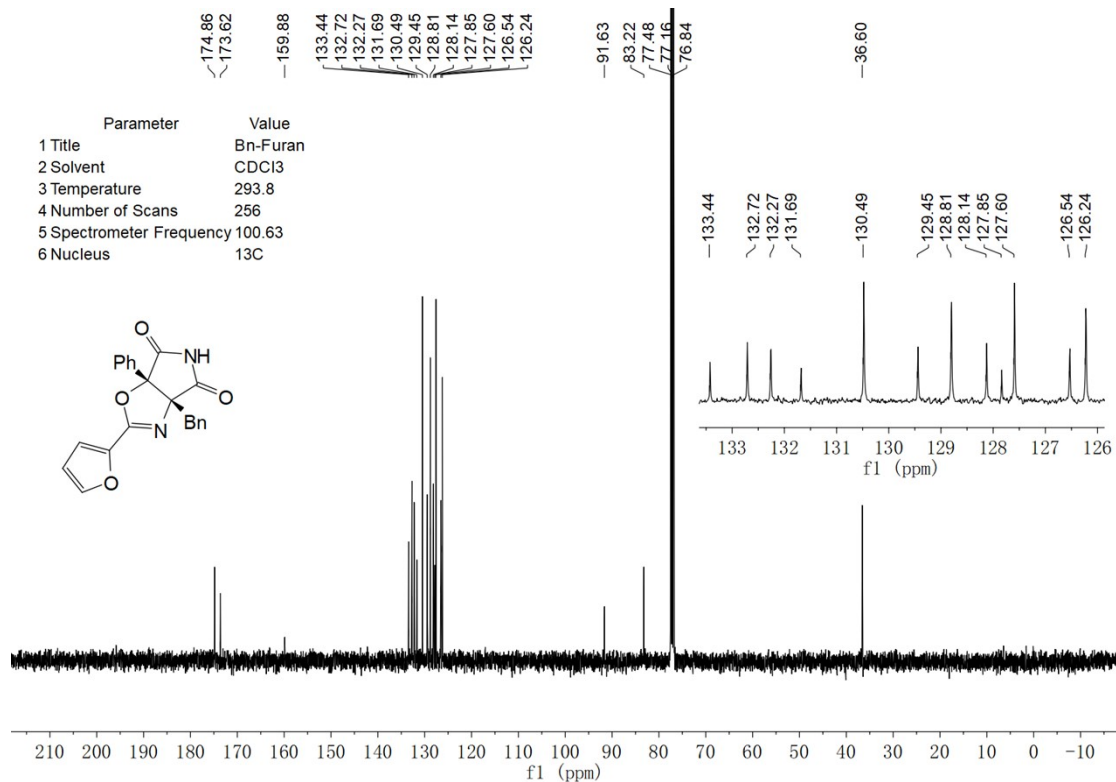

41a

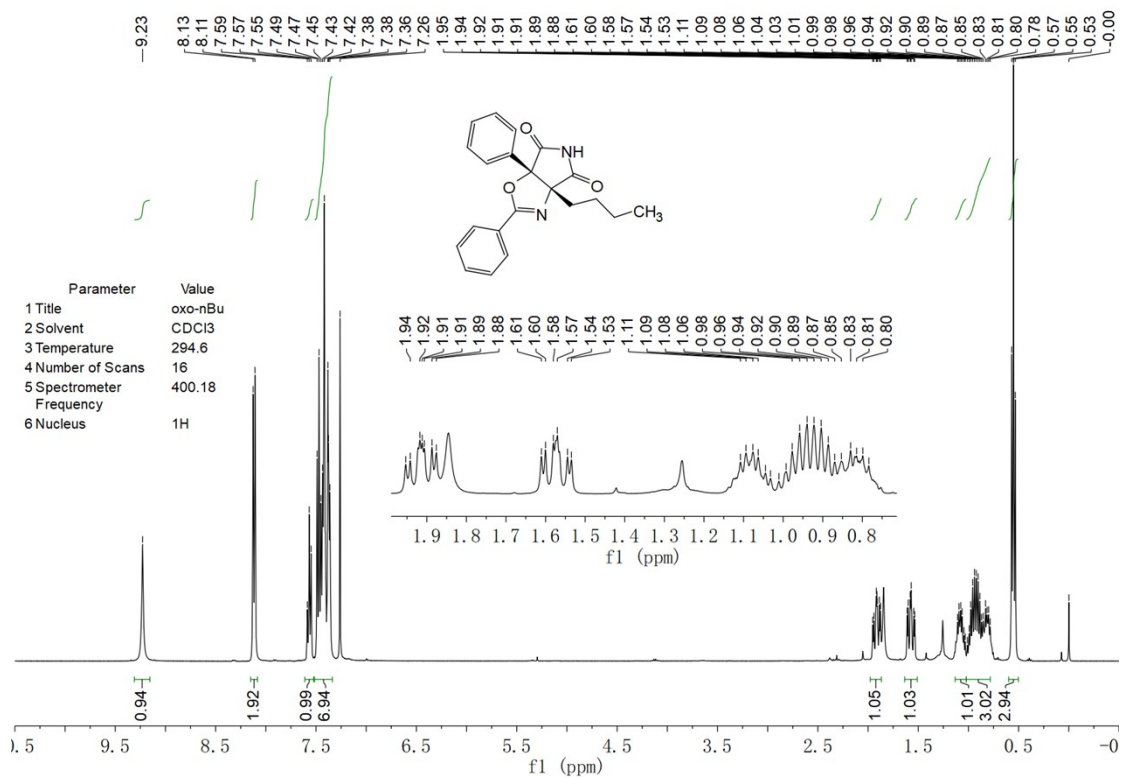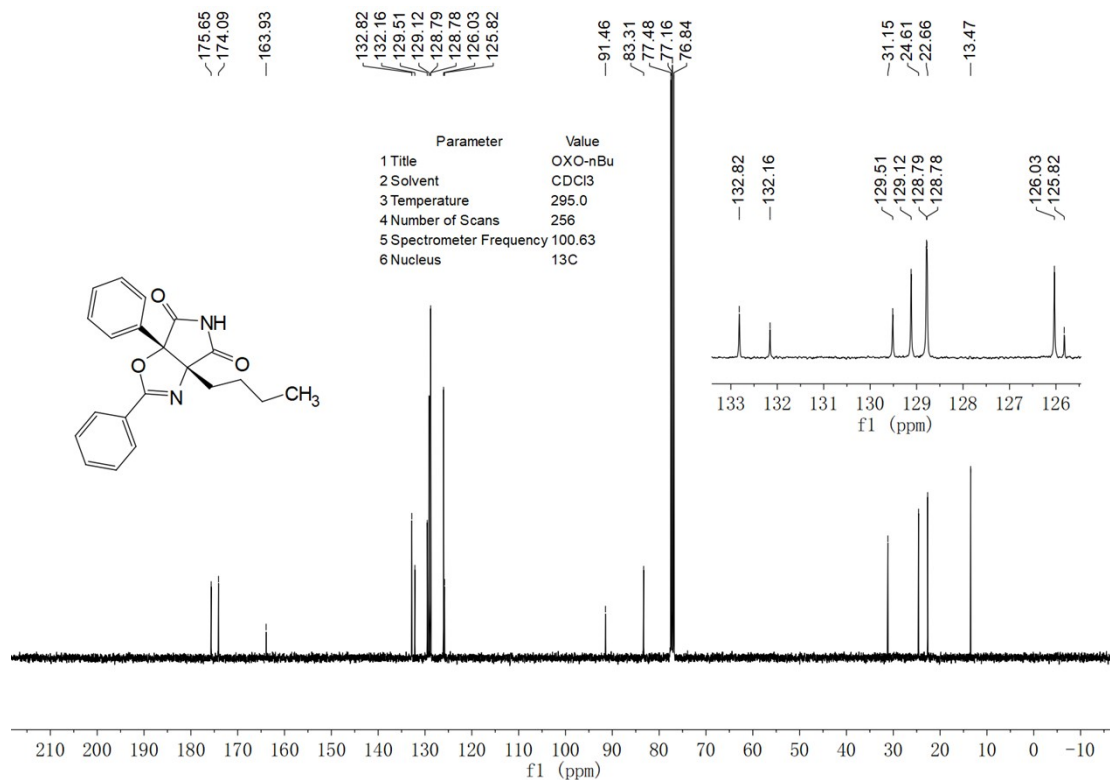





4na

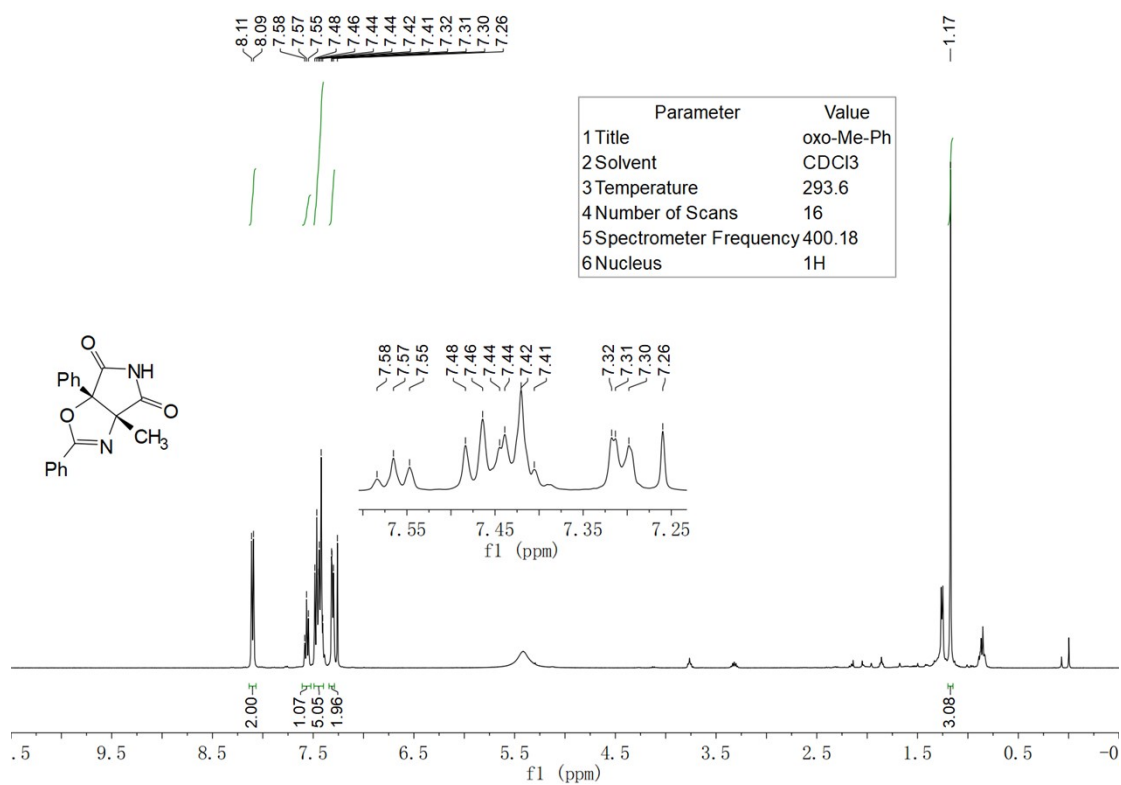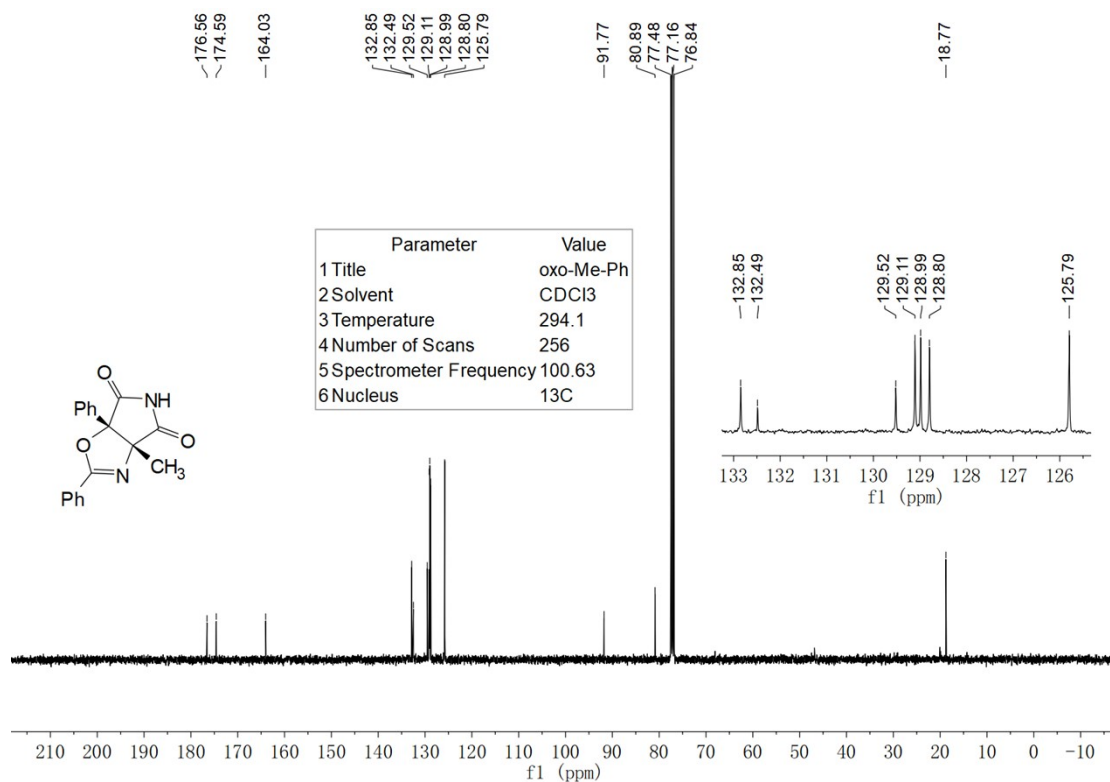

40a

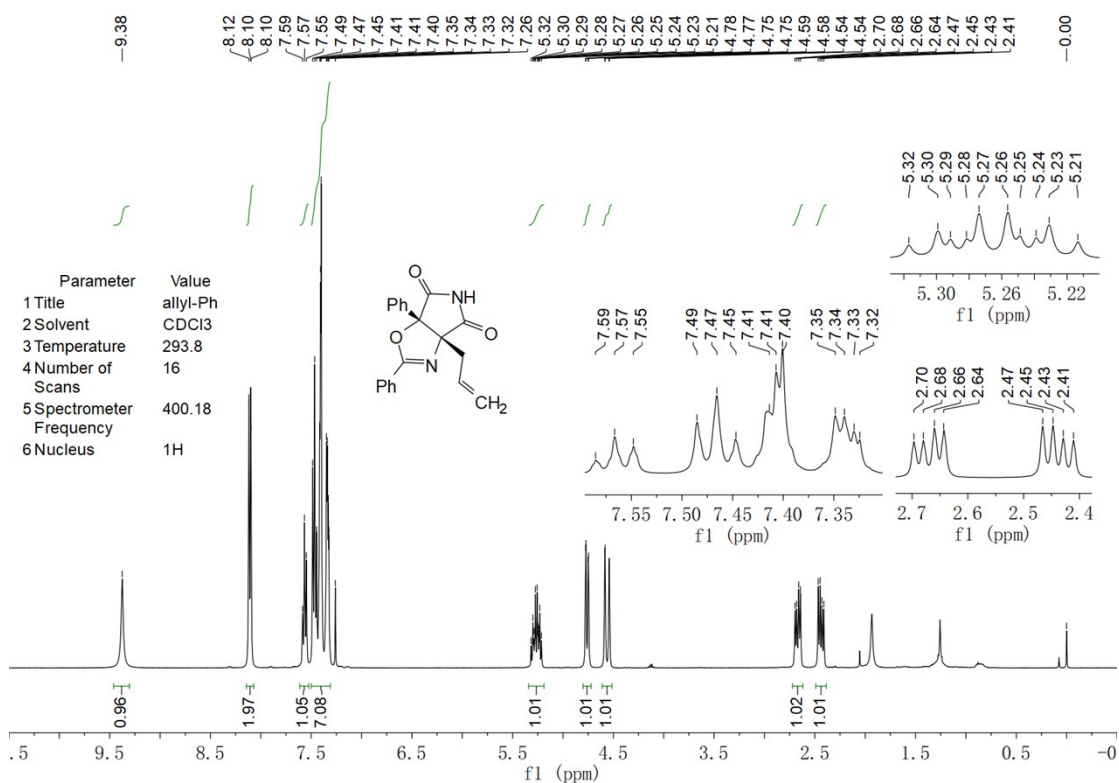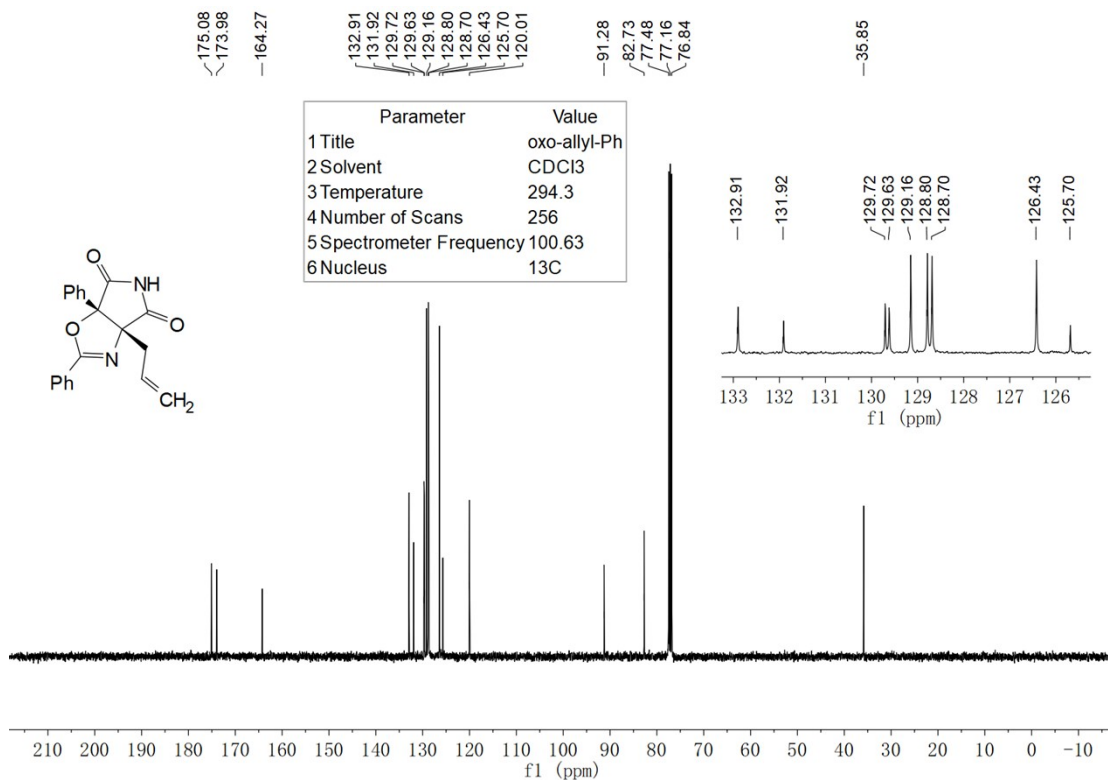

4pa

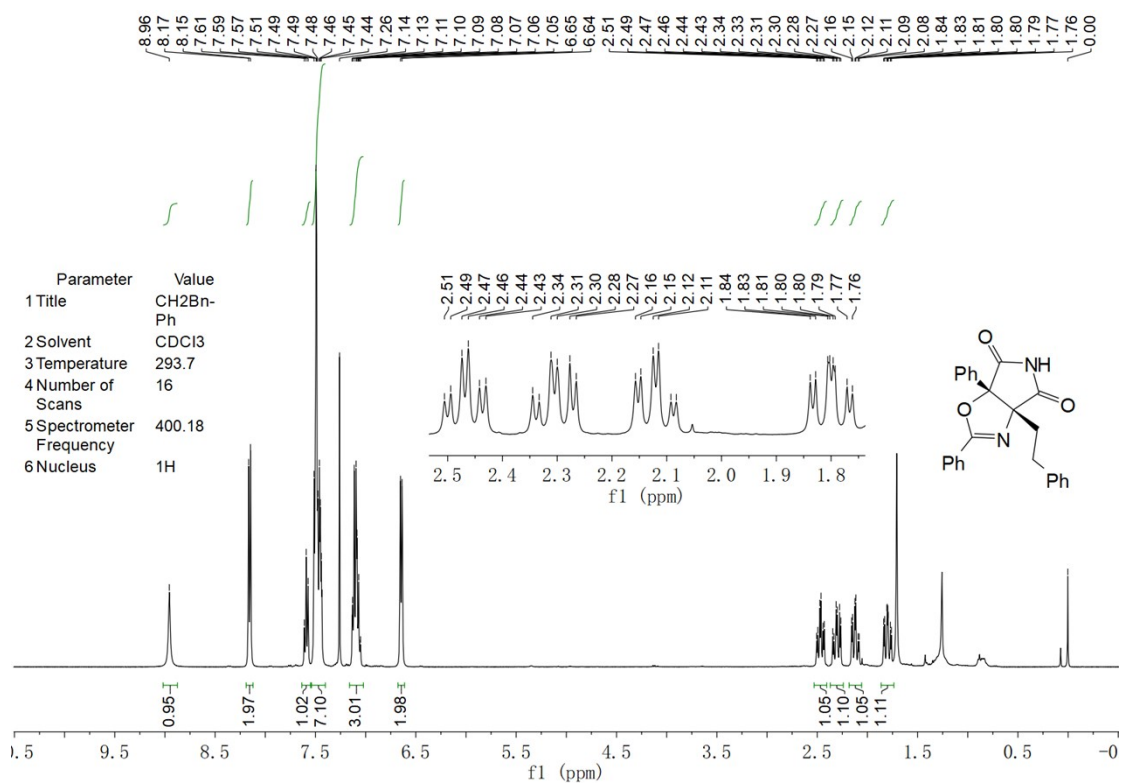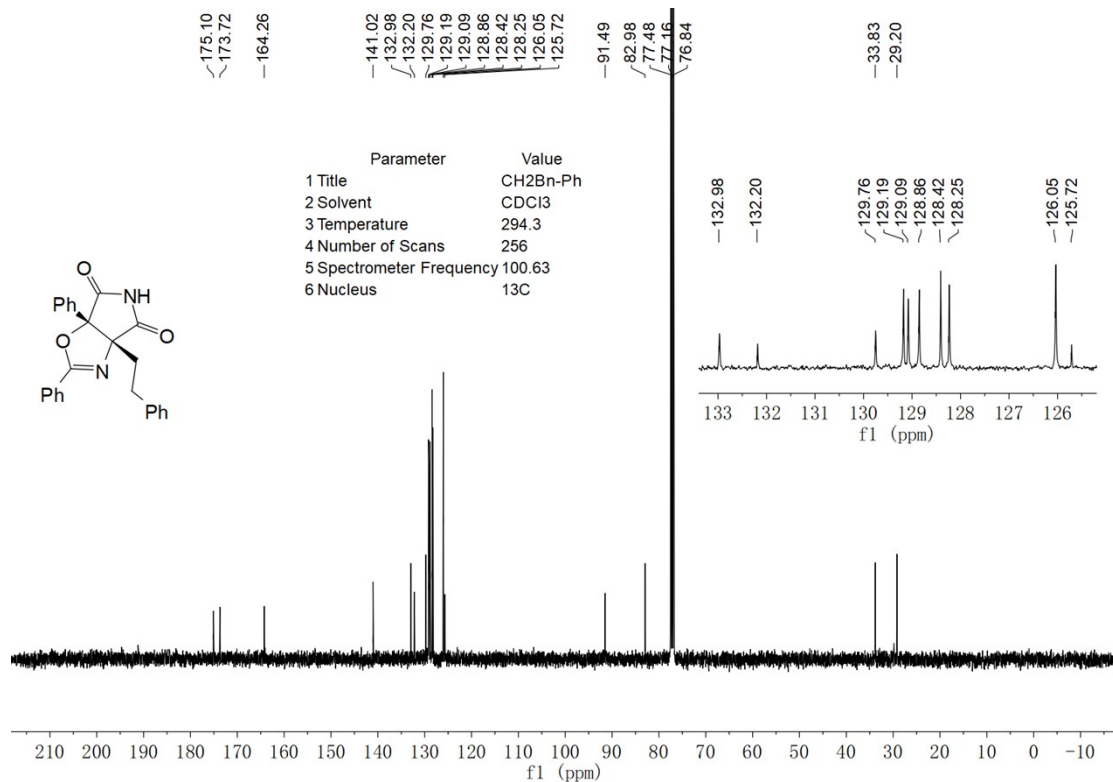

4qa

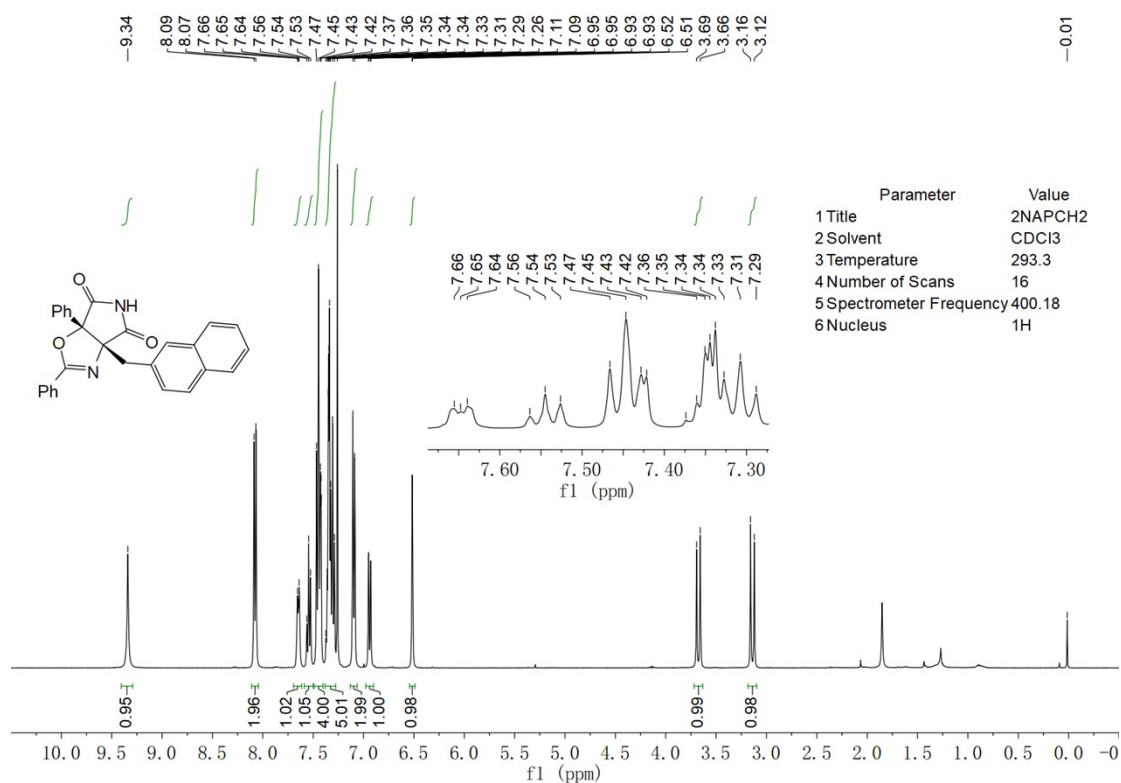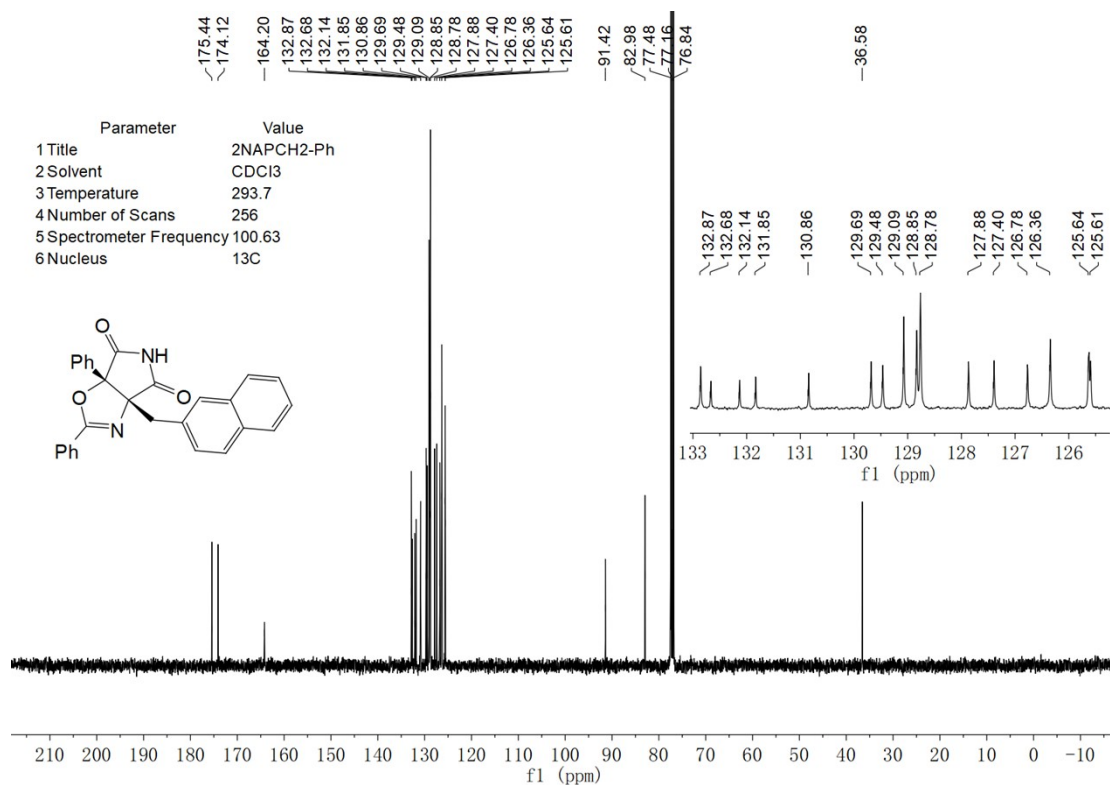

4ra

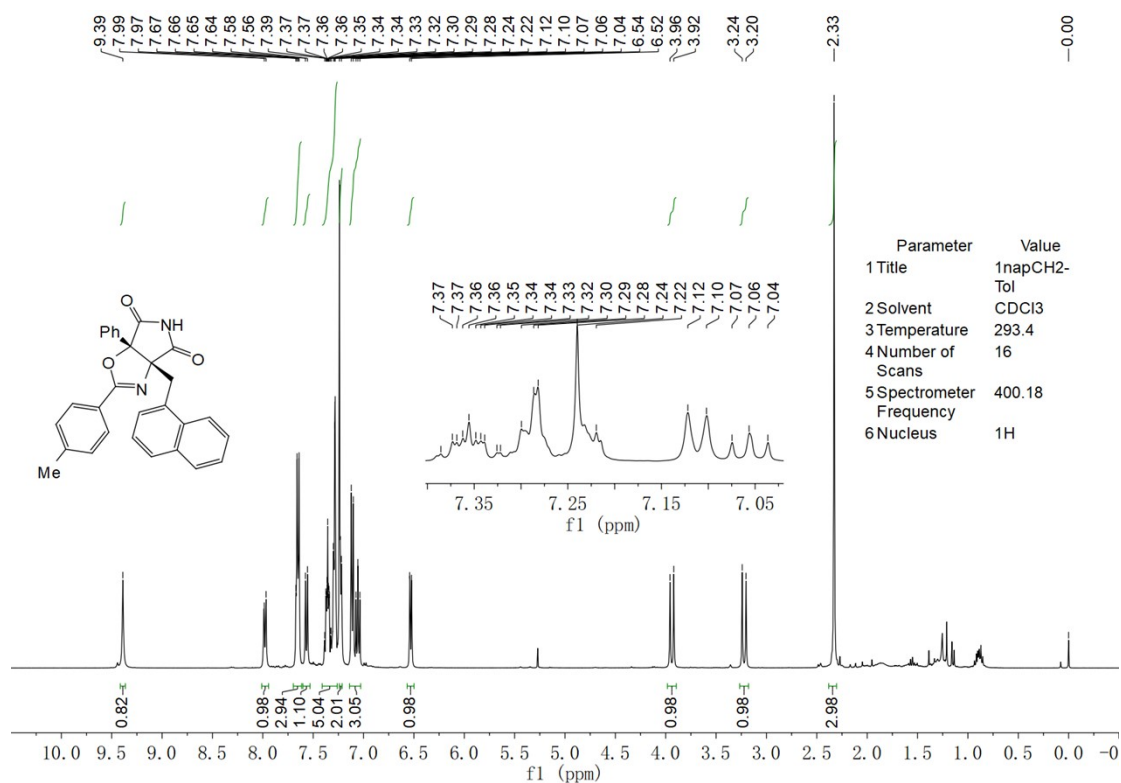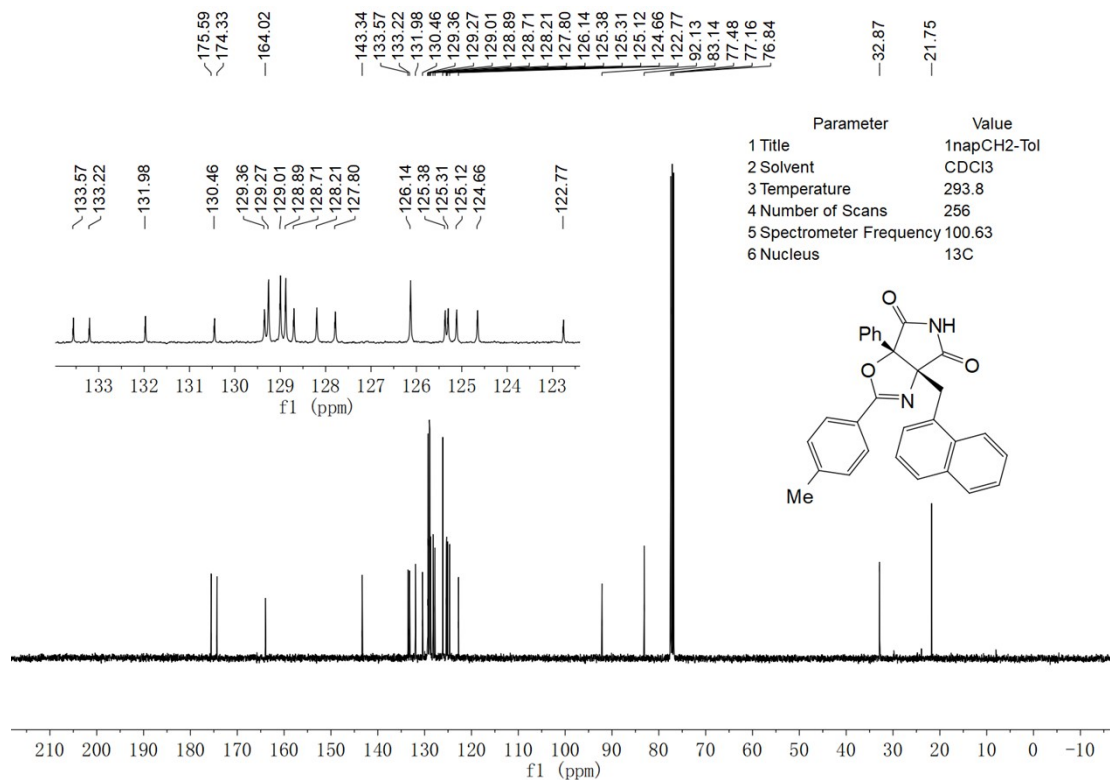



4sa

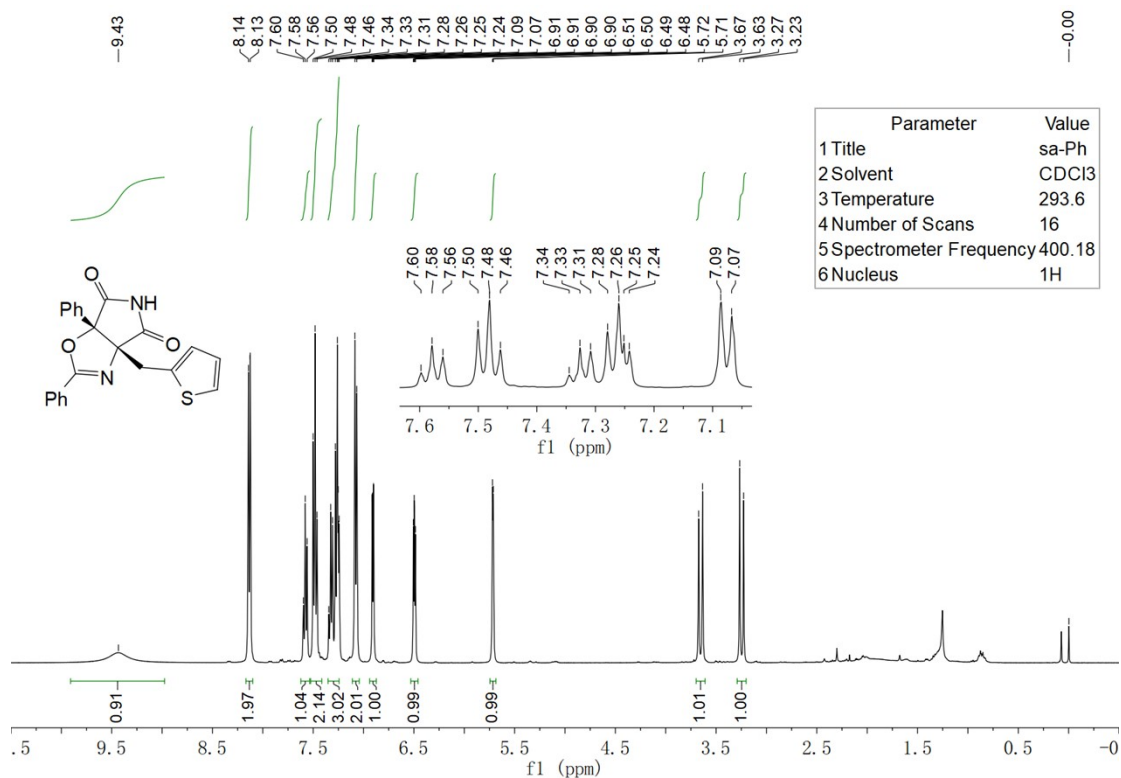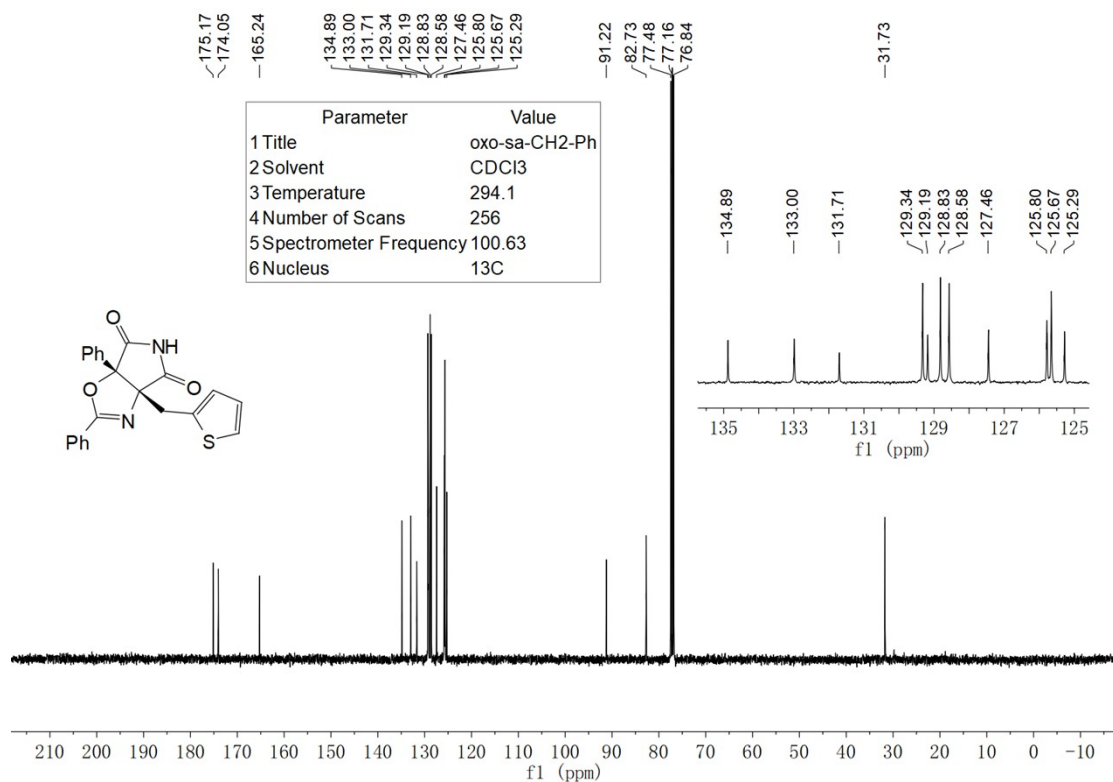

4ta

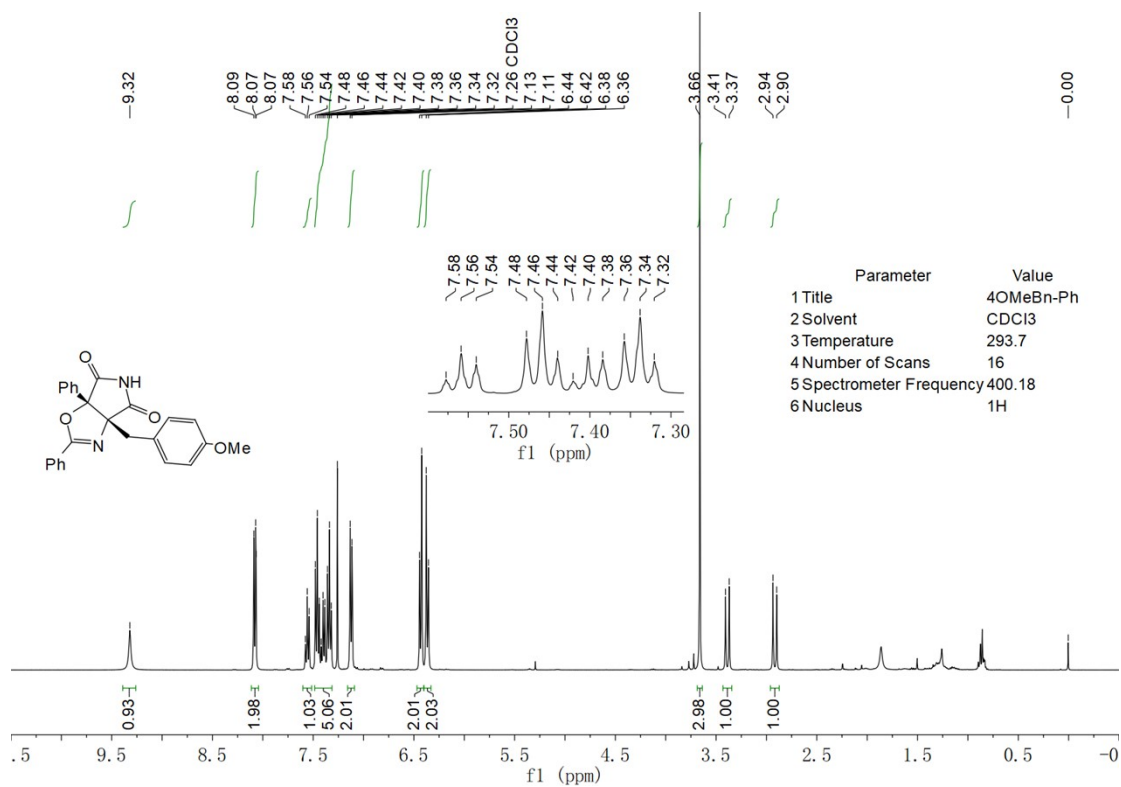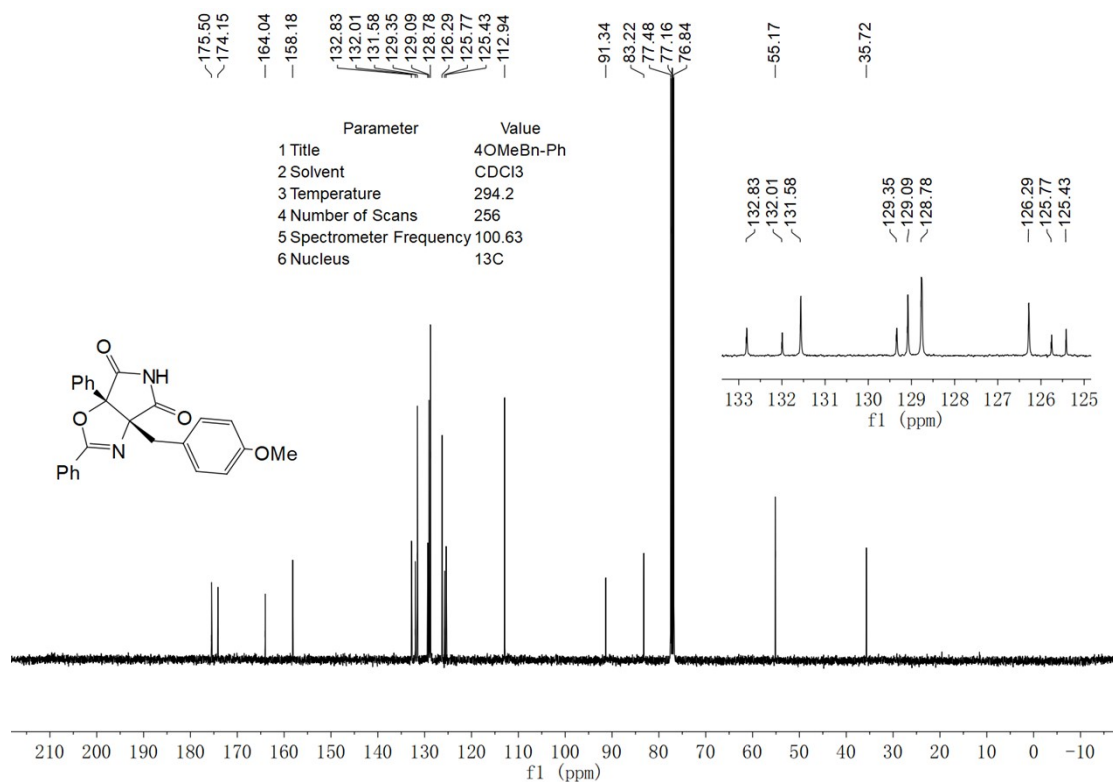



4ua

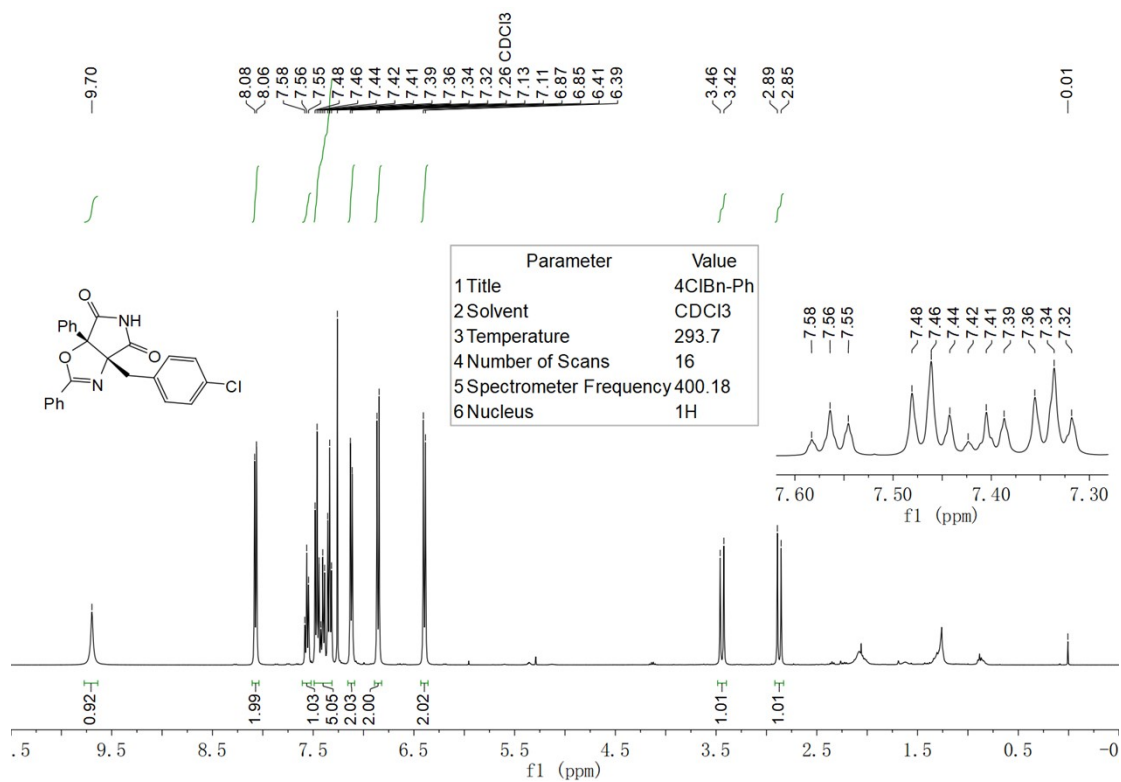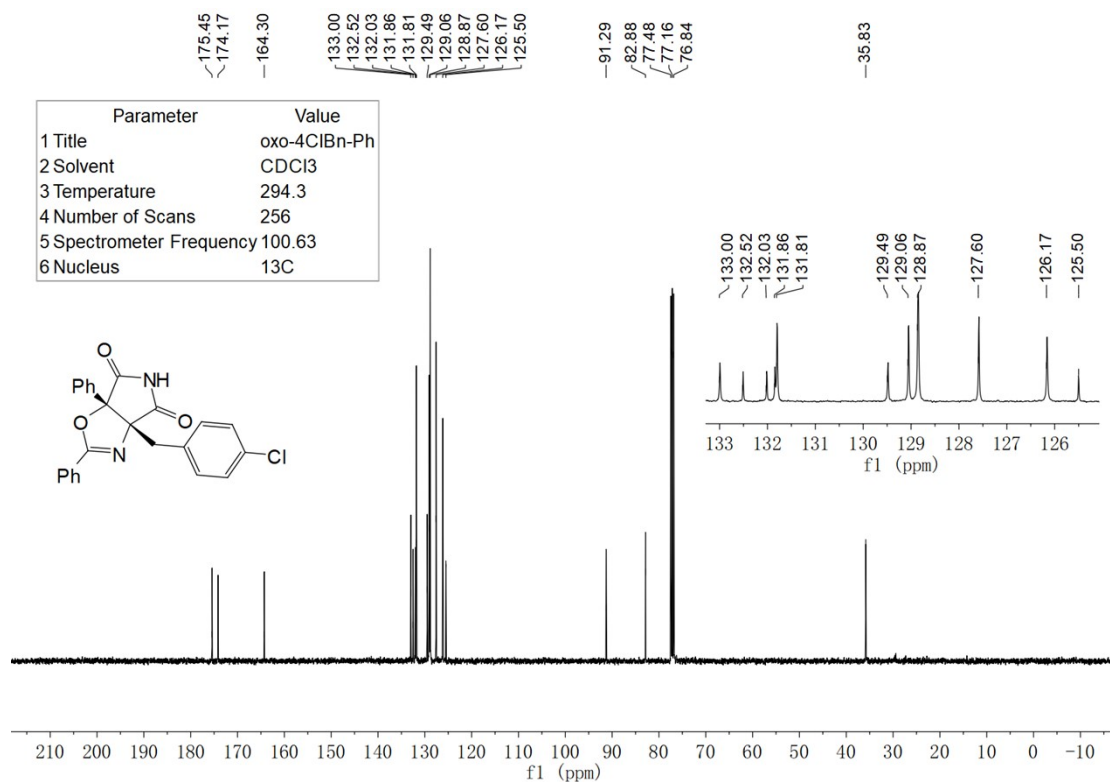

4va

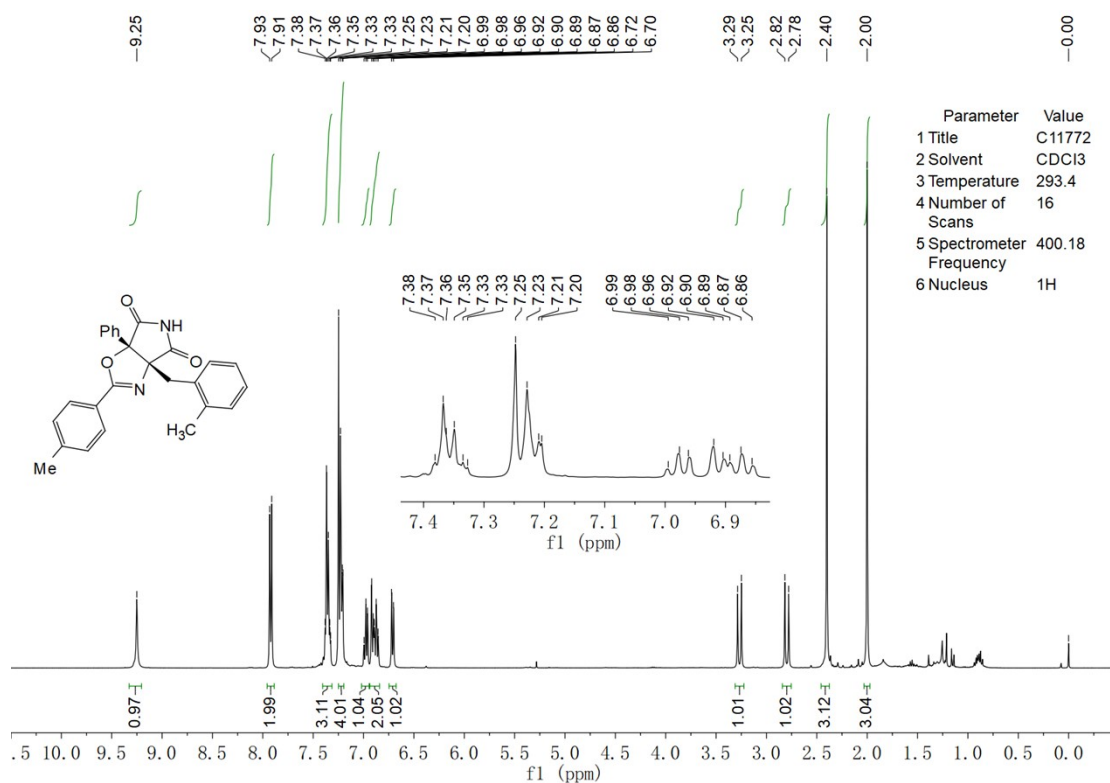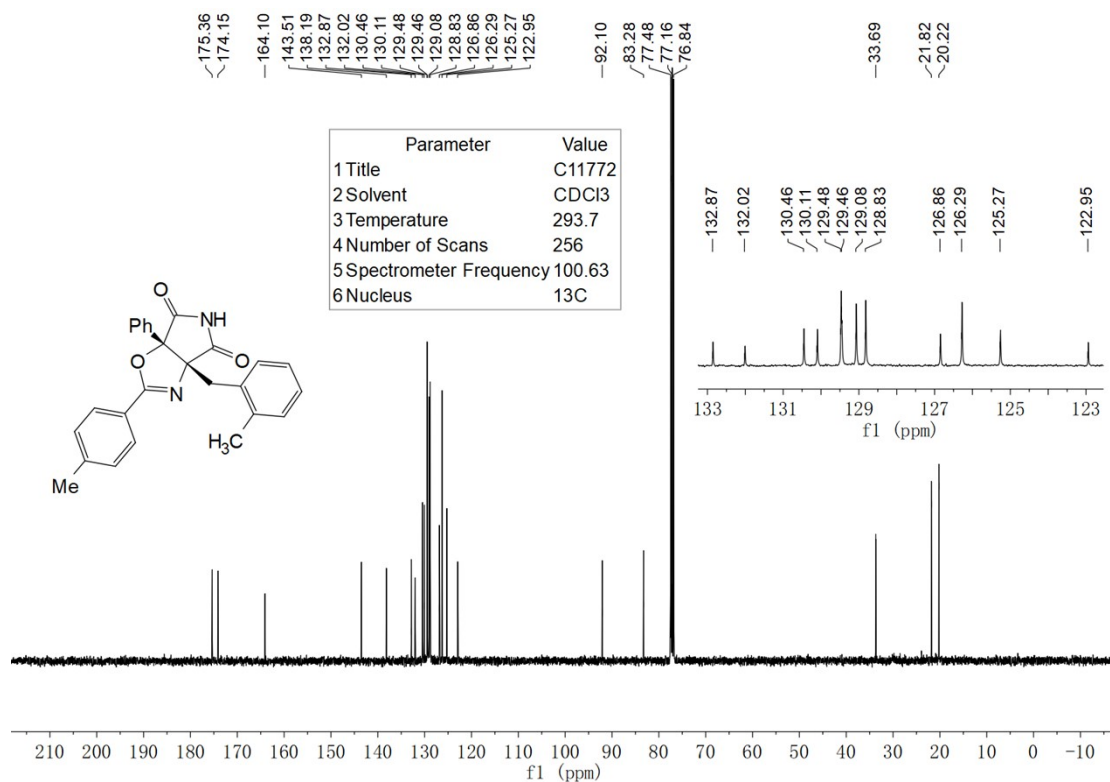

4wa

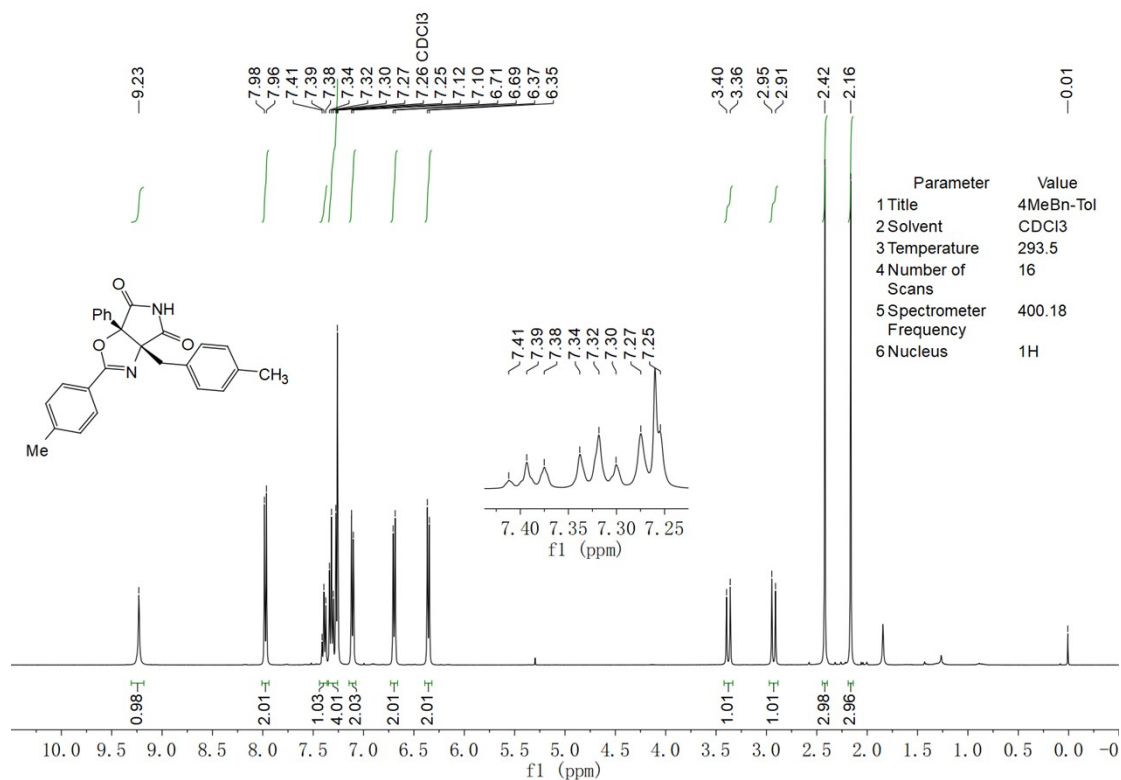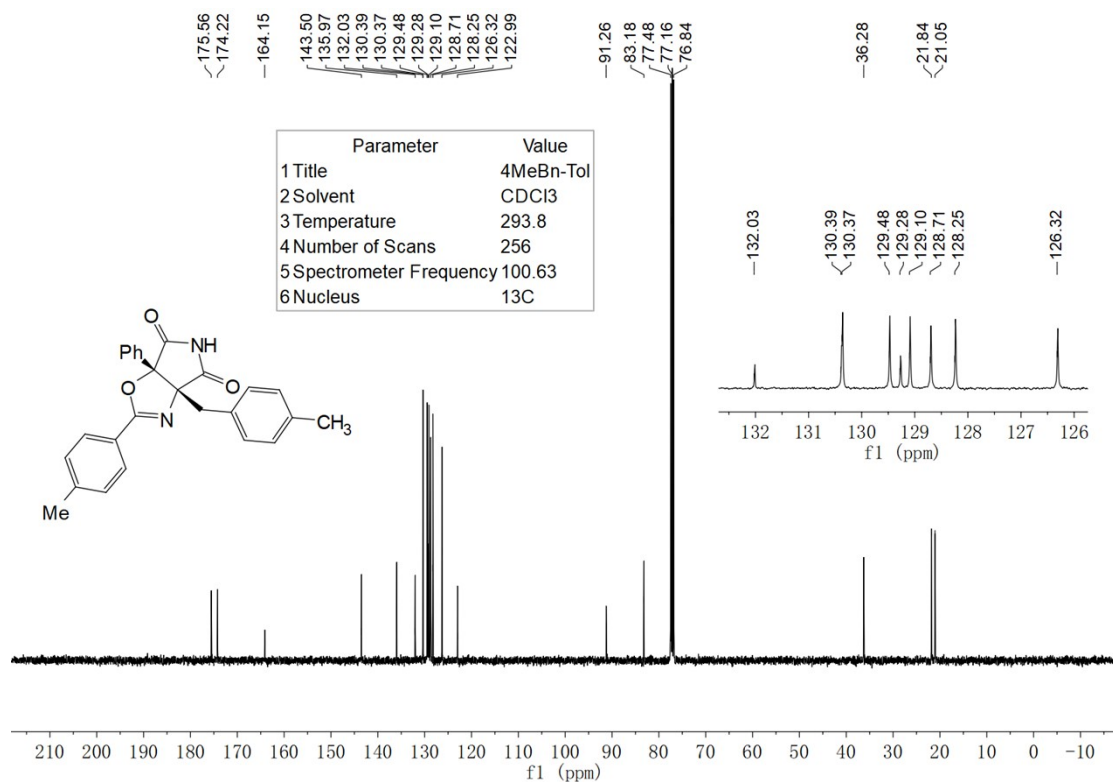

4xa

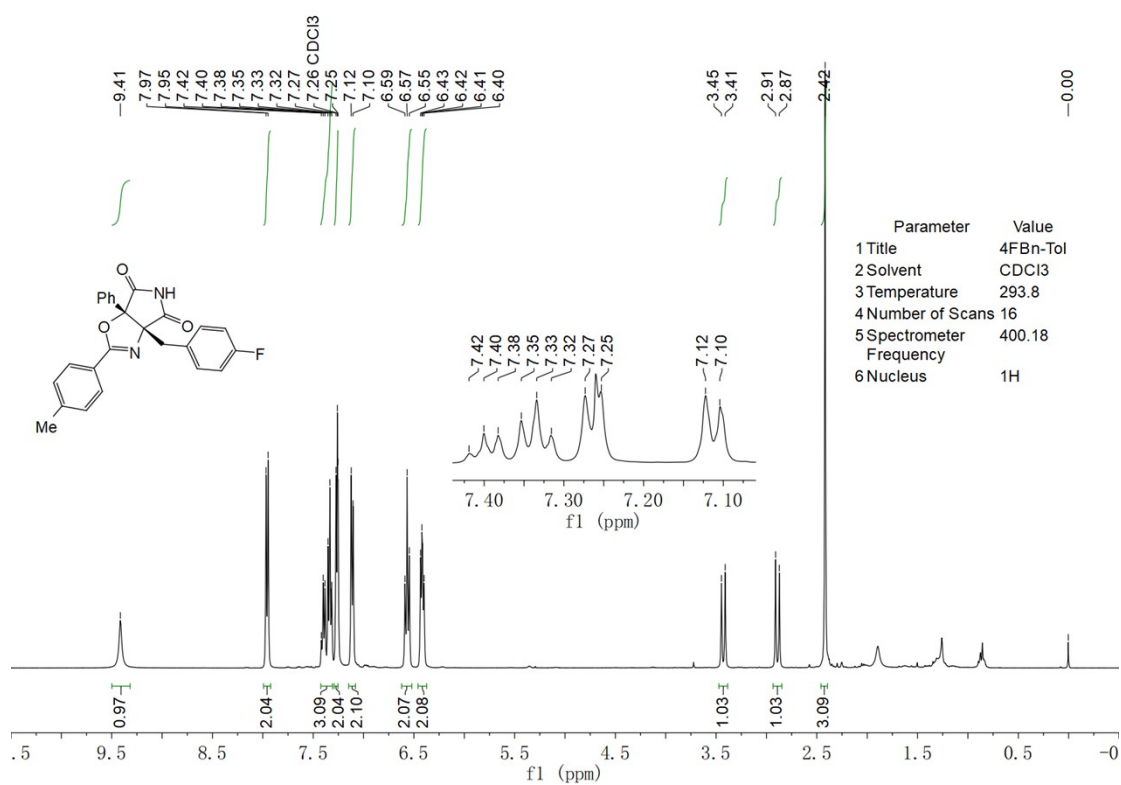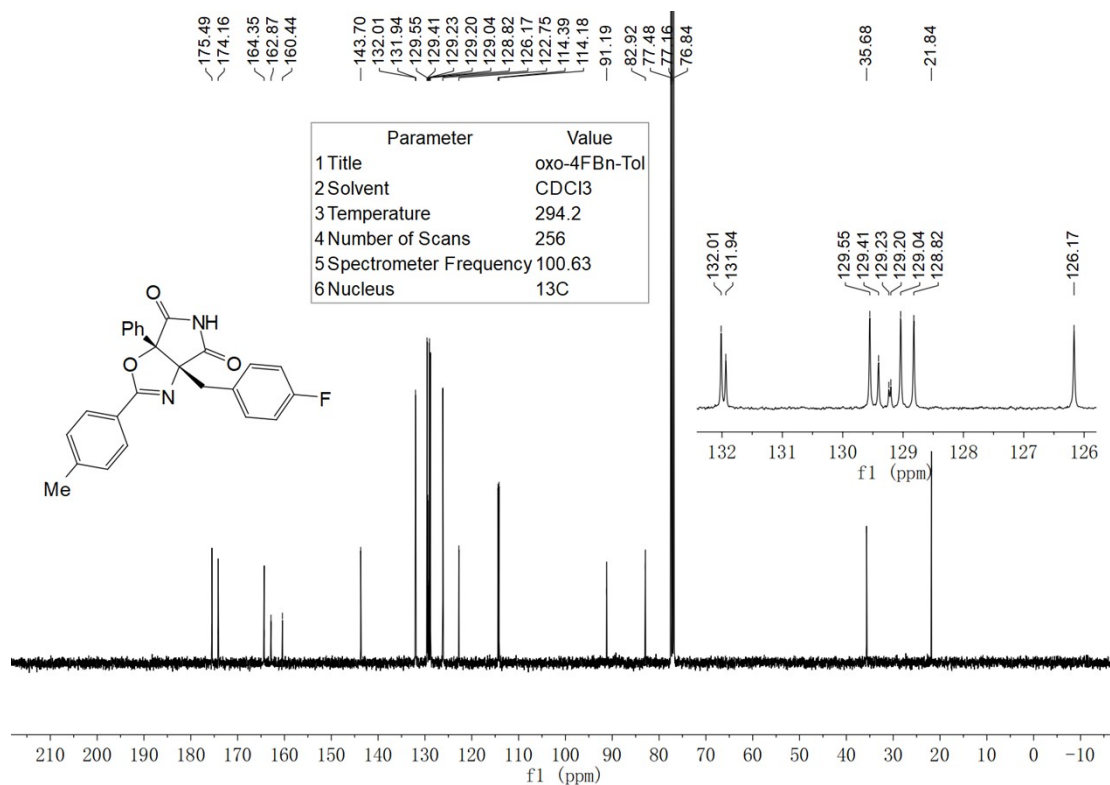

| Parameter                | Value           |
|--------------------------|-----------------|
| 1 Title                  | f-NMR-c11575    |
| 2 Solvent                | CDCl3           |
| 3 Temperature            | 293.7           |
| 4 Number of Scans        | 16              |
| 5 Spectrometer Frequency | 376.55          |
| 6 Nucleus                | <sup>19</sup> F |

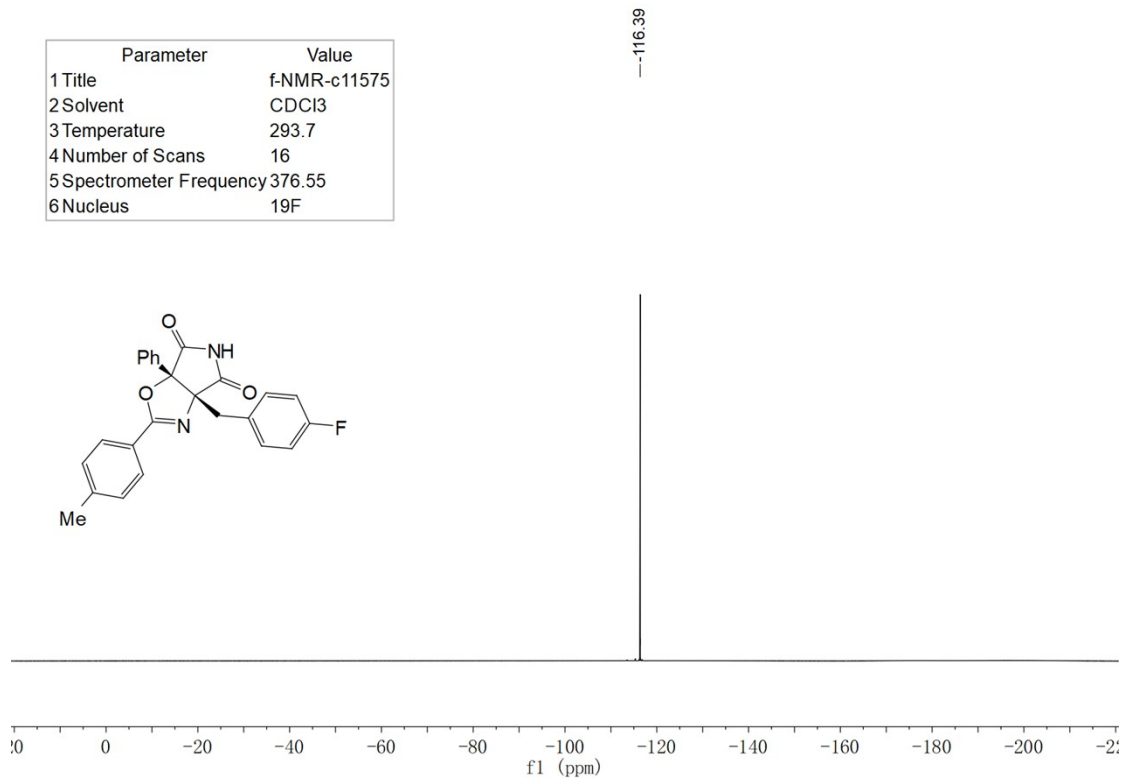

4ya

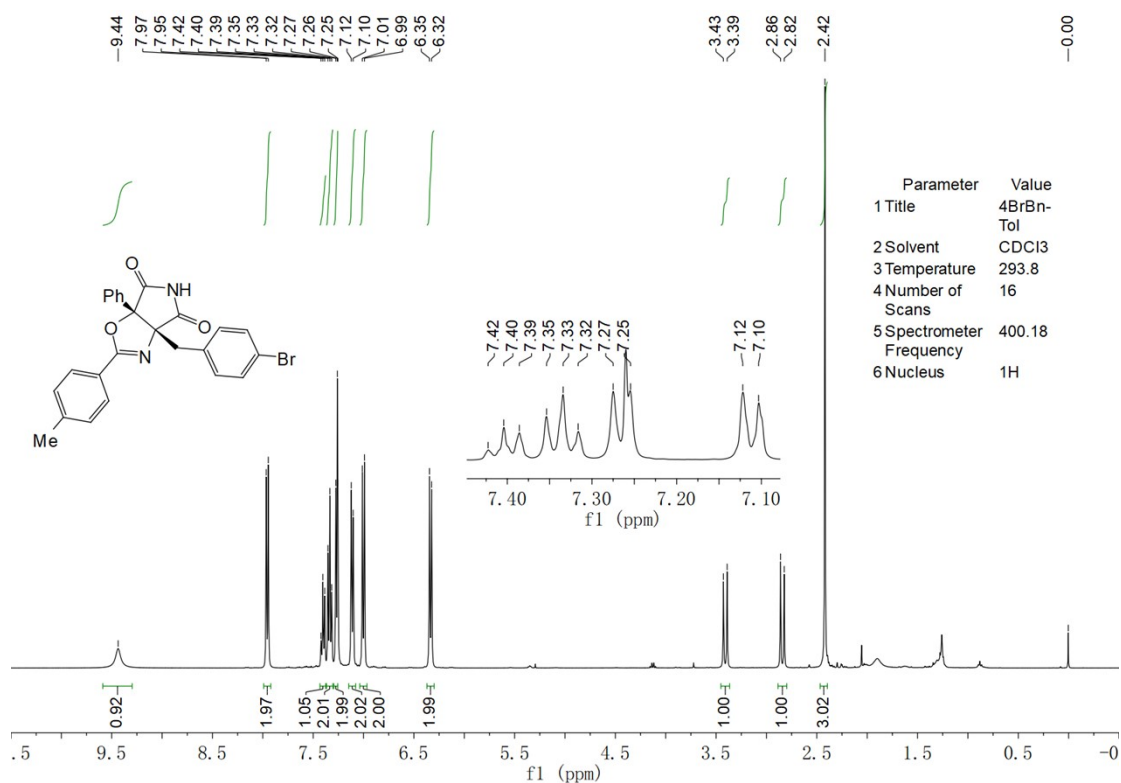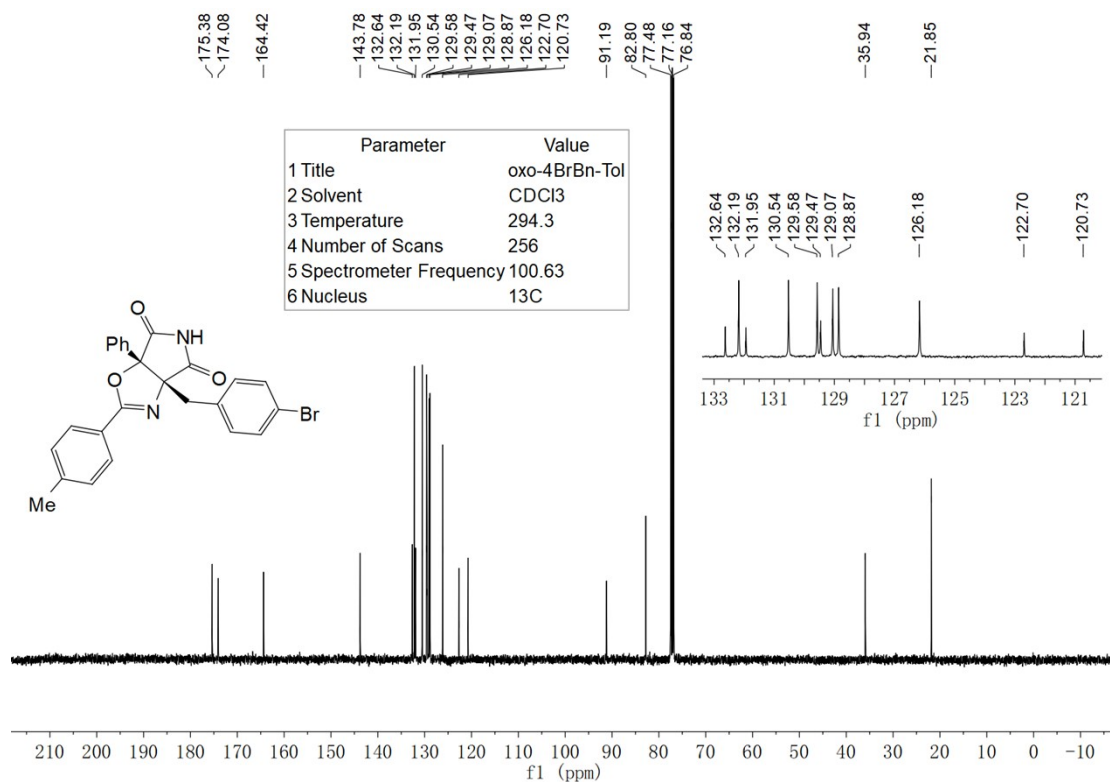

4za

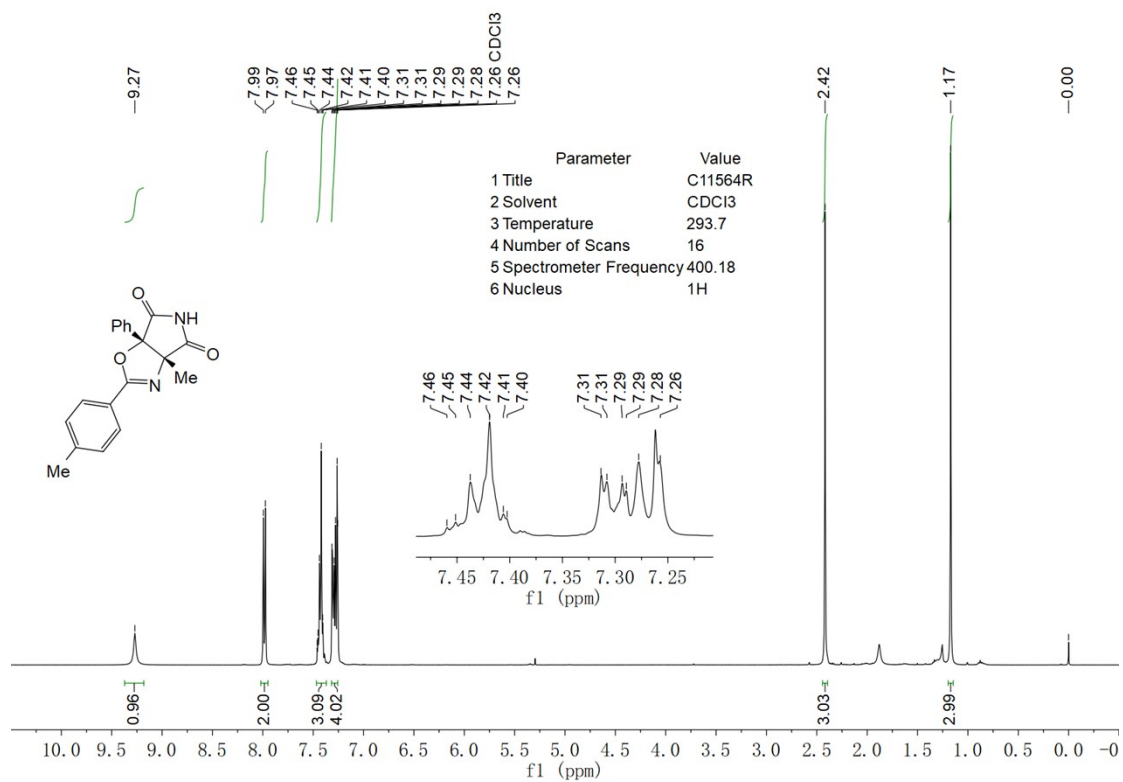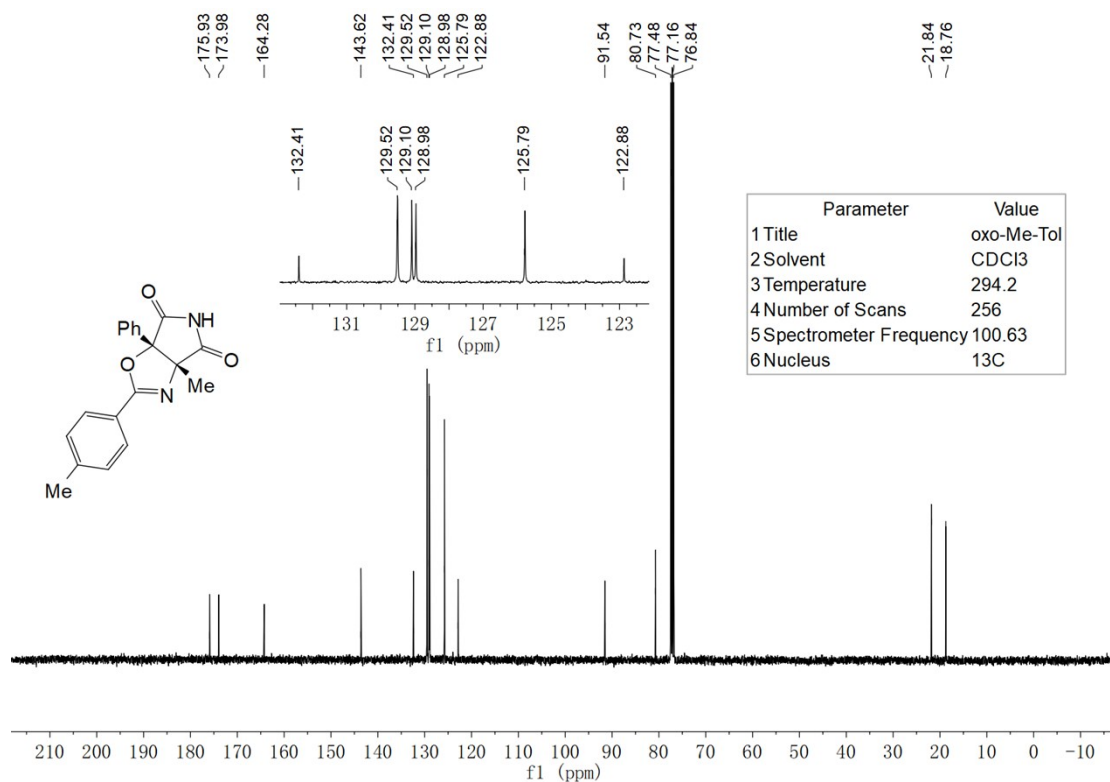



5

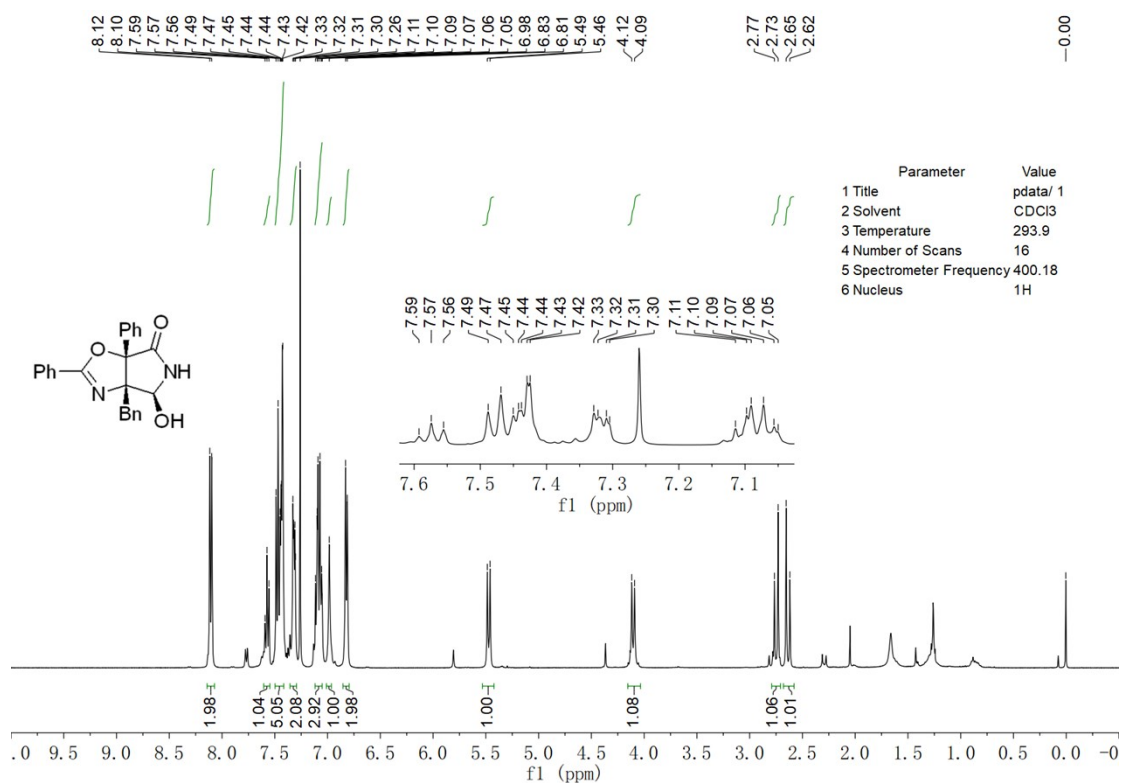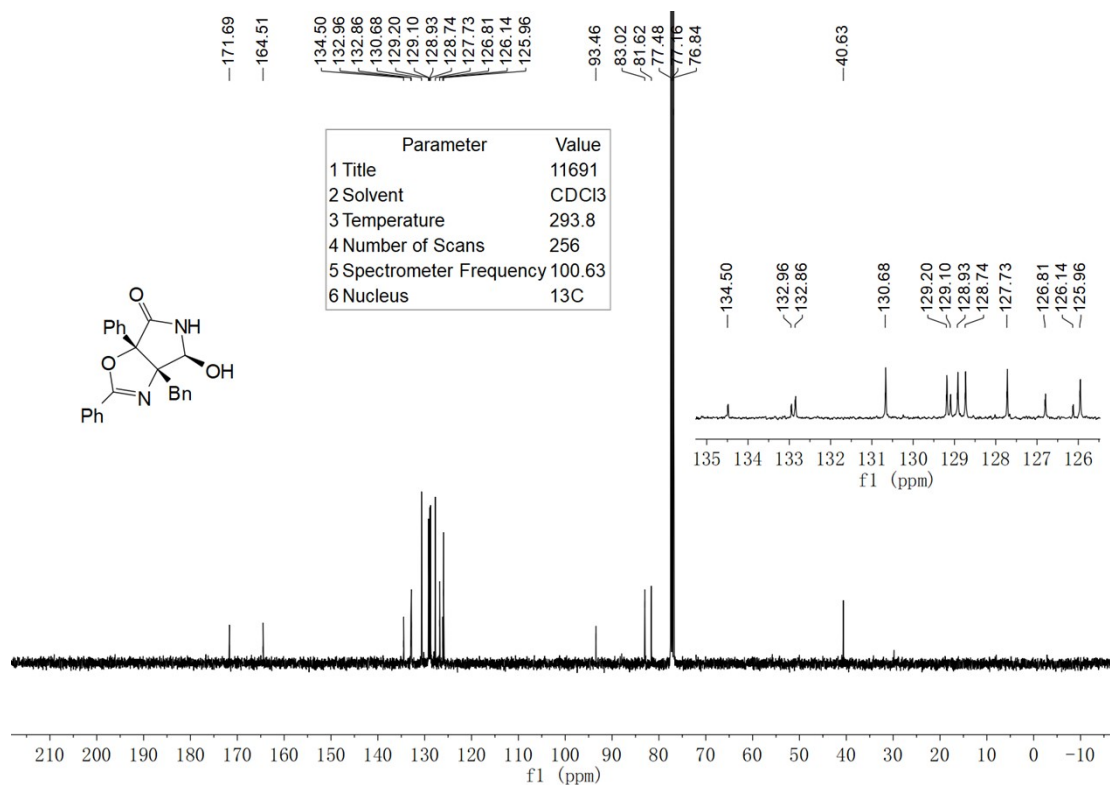



6a

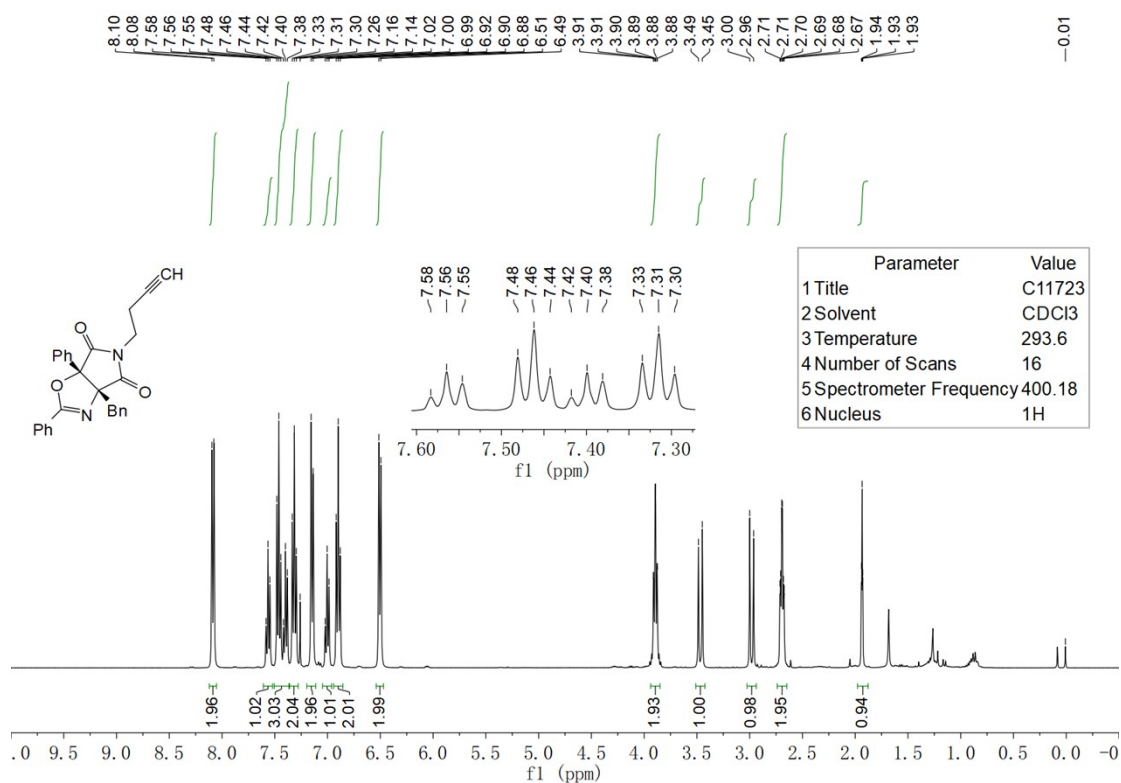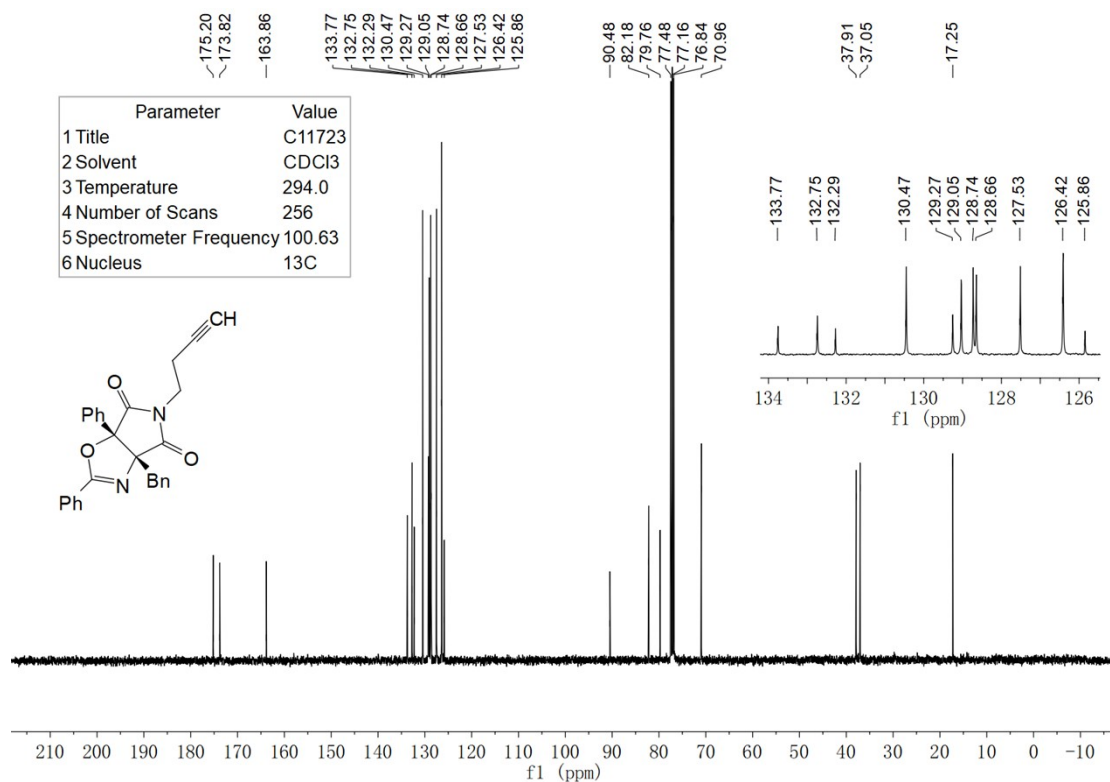

6b

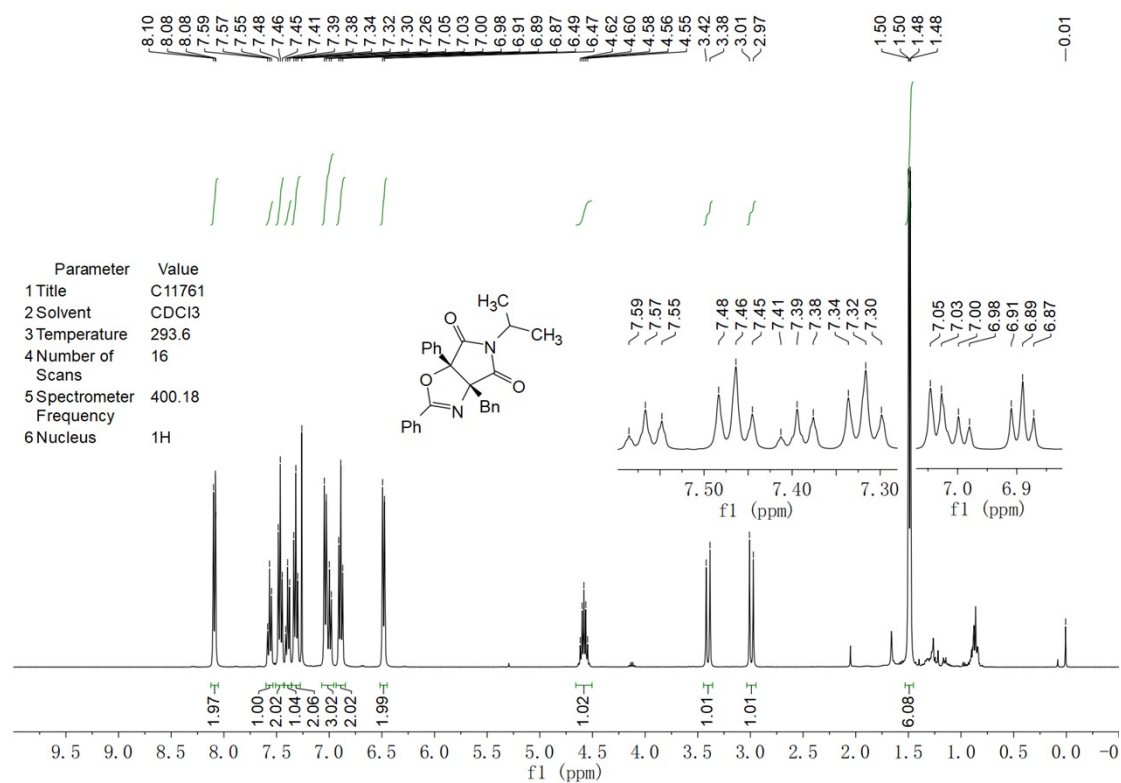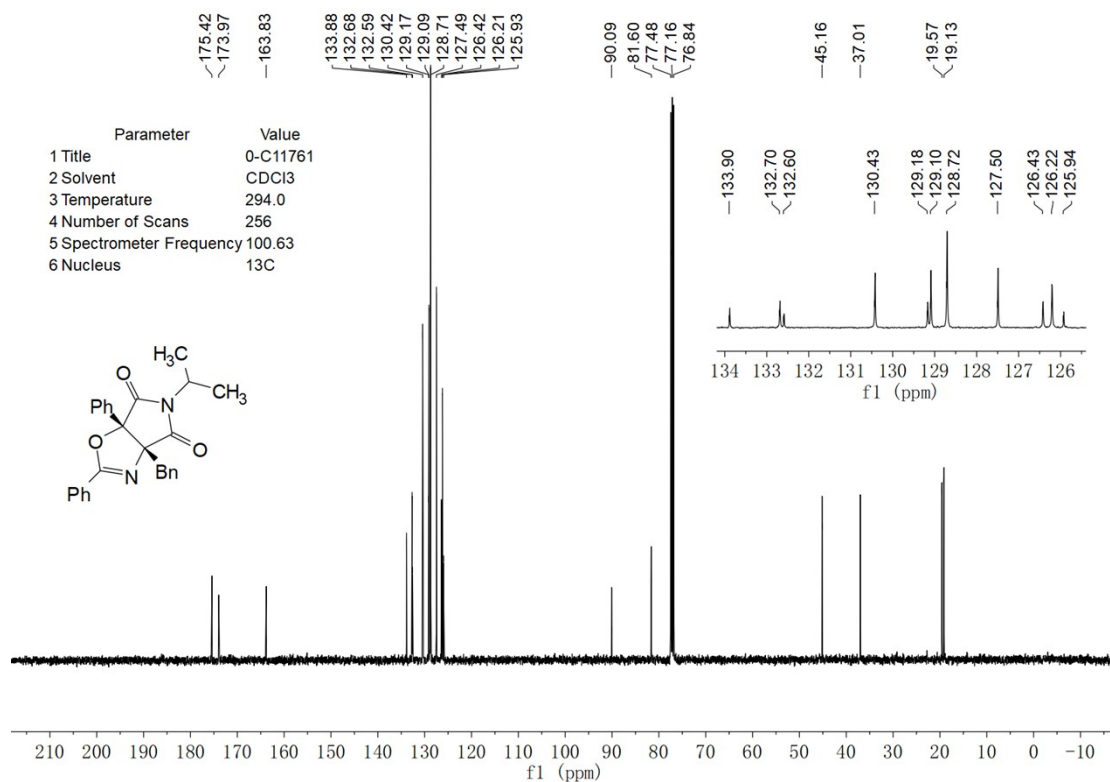

7

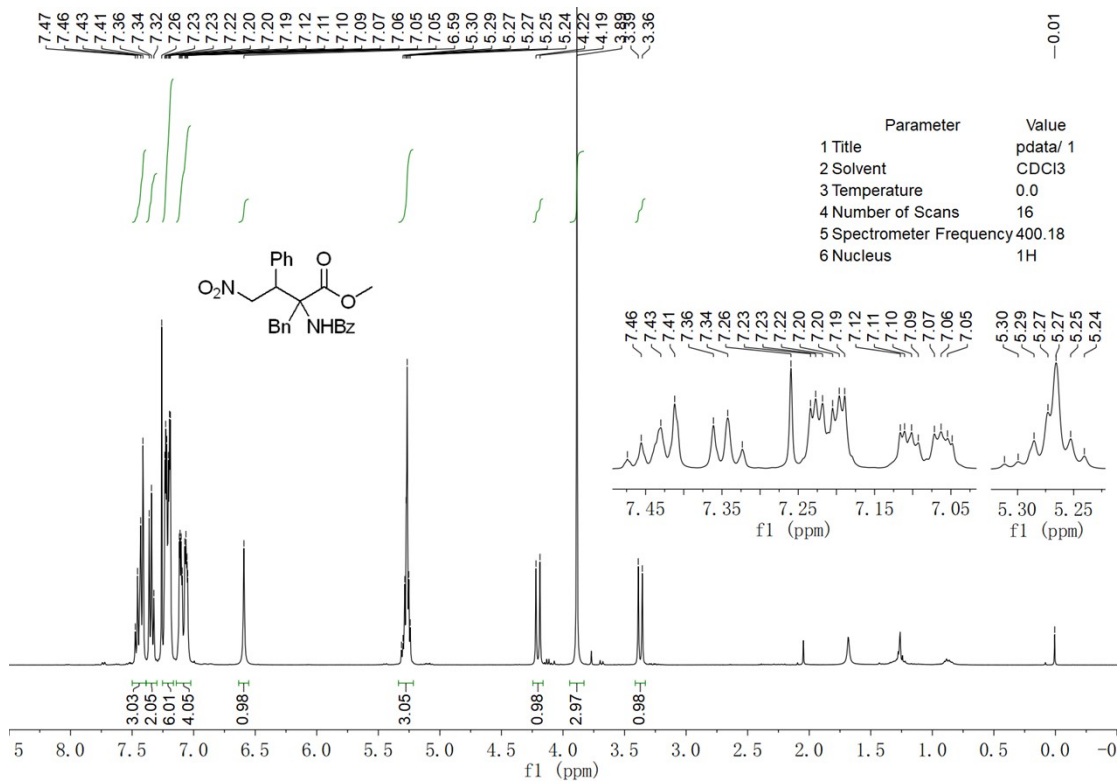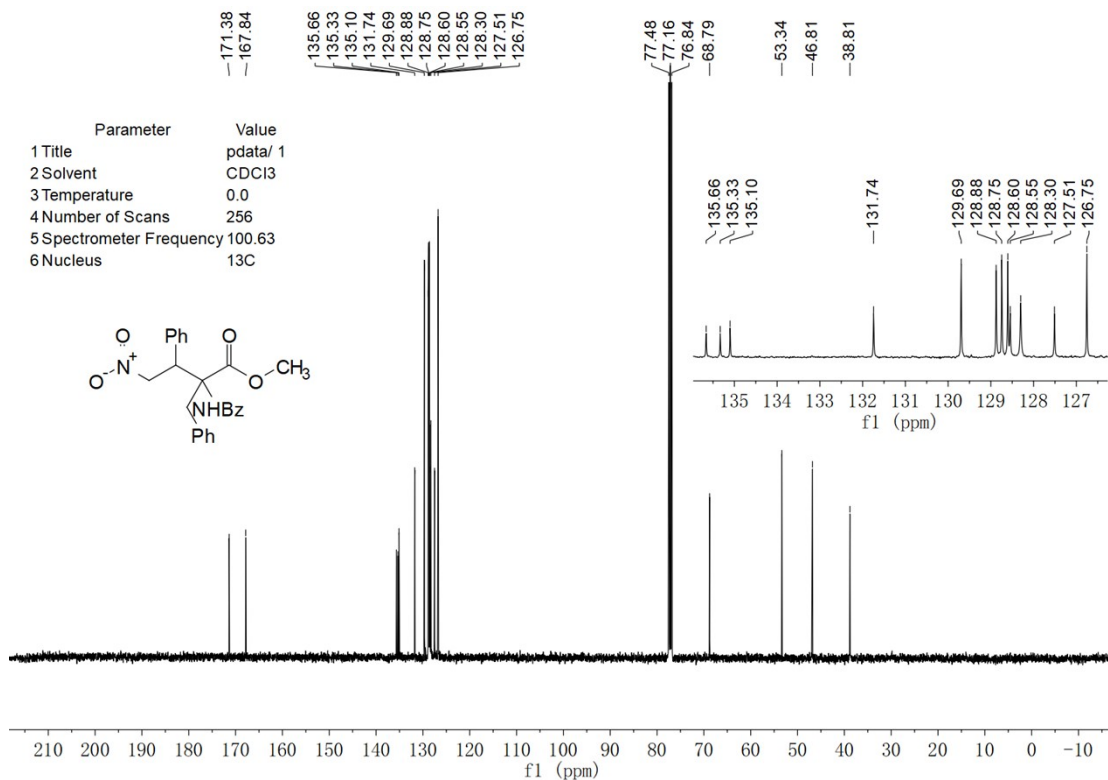

8

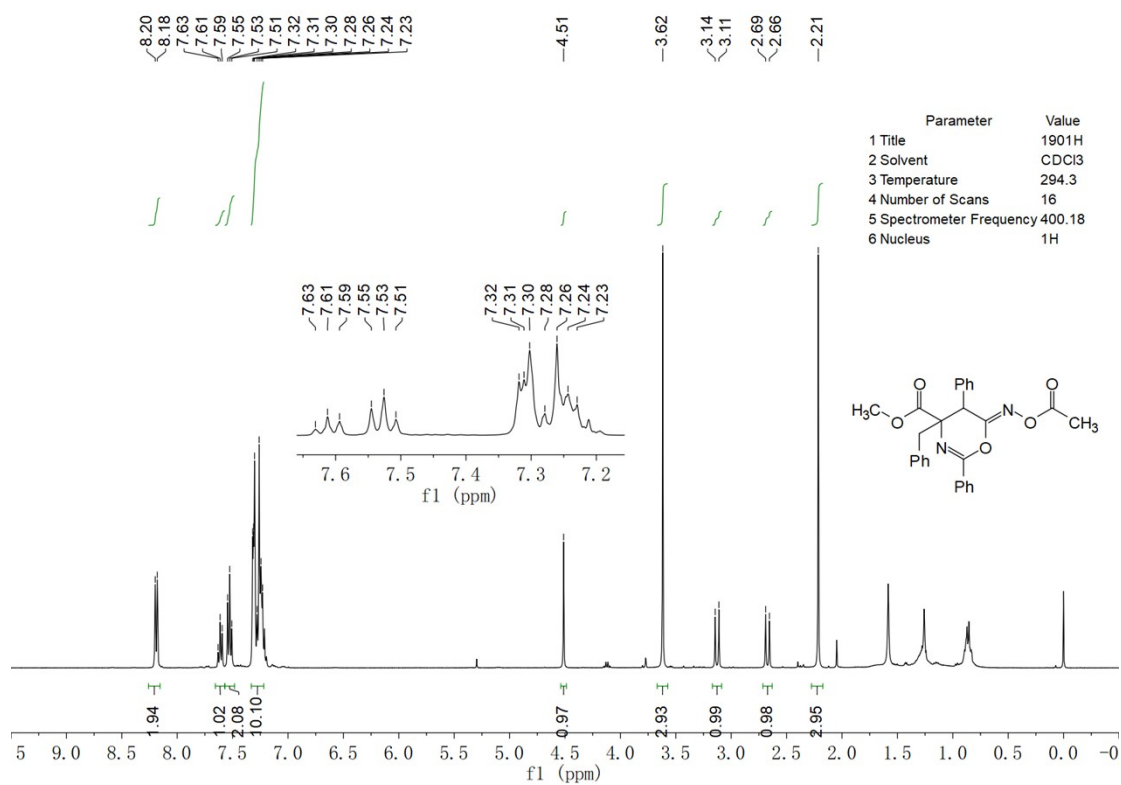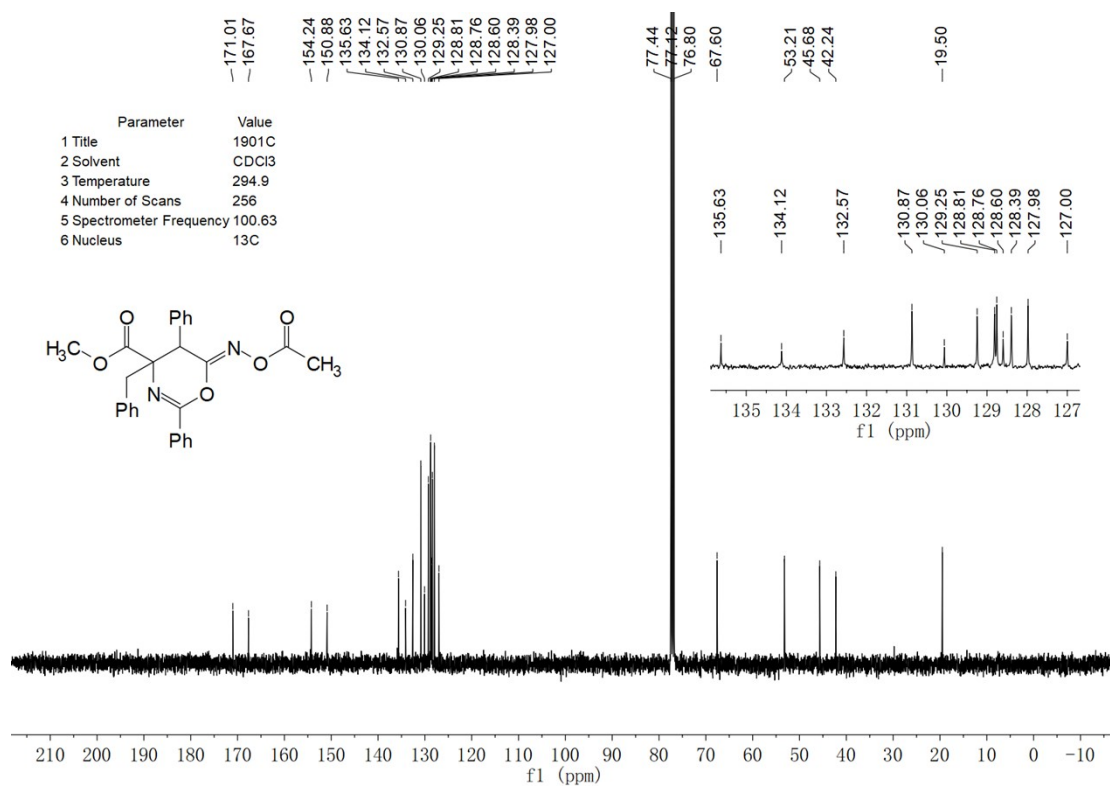

Supplement: d4cc04858j1.pdf [file d4cc04858j1.pdf]
